# Supplementary material for: MCT1 governs a metabolic checkpoint at pachytene during spermatogenesis
Source: Research Square preprint supplement (doi:10.21203/rs.3.rs-9544748/v1), 2026-04-30
Supplement: Supplementary file 1 [file 6ffdad8e4198344f2d39dc09.xlsx]

## Sheet: Fig1
	AMP	Pyruvate	Acetyl-CoA	Glutamate	2OG	Oxaloacetate	Glycine	Succinate	UDP-N-acetylglucosamine	lysine	Aspartate	Glutathione	Arginine	Glutamine	Serine	Methionine	Ornithine	Phenylalanine	Tyrosine	Succinyl-CoA	Cysteine	B-Alanine	Propanoyl-CoA	Glucose-1-phosphate	UMP	Dolichyl phosphate	CDP	Choline	G3P	PRPP	Fumarate	Leucine	IMP	Putrescine	Histidine	GMP	Proline	Malate	Citrate	UDP-glucuronic acid	Valine	Cholesterol	Threonine	3PD	dCMP	Lactate	Hypoxanthine	Glucose	Citrulline
AAACCCAGTACATACC.1	-0.00543429	-0.00132065	-0.0792222	-0.0147222	0.0115943	0.00294415	0.00110097	0.000710294	-0.000271677	0.00115348	-0.00133222	-0.00375745	-0.0011744	0.0079774	-0.00377611	-0.0854469	0.00529262	1.46851e-05	0.000132952	0.00711178	-0.00325633	0.00582224	0.00211228	-0.00575772	0.00408694	2.53217e-05	0.0805107	-0.000325633	-0.00172912	-0.0124607	0.0176461	-0.0890902	-0.00664479	-6.7454e-05	-0.00272197	-0.00639981	1.67266e-06	-3.28645e-05	-0.0175712	0.00274862	1.77771e-05	-0.000837978	8.14907e-09	0.00171492	-3.1665e-08	0.00185048	0.000509068	0.00118686	0.000265954
AAACGAAAGTGGTTAA.1	-0.00969074	-0.000601652	-0.102672	-4.55612e-05	0.0125761	0.00291596	0.00112608	0.00600813	-0.000279774	0.0013332	-0.00140361	-0.00444112	-0.0011418	-0.00791814	-0.00467027	-0.0373968	0.00526154	1.45733e-05	0.000133831	-0.00119007	-0.00390488	0.00584504	0.00215235	-0.00553644	0.00407052	7.19875e-05	0.101866	-0.00035069	-0.00176987	-0.014366	0.0129371	-0.0930011	-0.00938275	-7.61938e-05	-0.002722	-0.0074583	5.32344e-06	-3.53325e-05	-0.0124461	0.00257362	1.74195e-05	0.000112131	8.17818e-09	0.00177021	-1.75787e-07	0.00184709	0.000472575	0.00113844	0.000265663
AAACGCTGTTGGCCGT.1	-0.00499149	-0.00131314	-0.071424	-0.0137973	0.0116341	0.00293569	0.00109728	0.00270267	-0.00026597	0.00115664	-0.00133349	-0.00373669	-0.00117561	0.00821472	-0.00375752	-0.083975	0.00529441	1.47596e-05	0.000132978	0.00633062	-0.00321554	0.00580669	0.00212706	-0.00572562	0.00410235	2.74591e-05	0.0737136	-0.000325089	-0.0016103	-0.0112813	0.0146525	-0.0835204	-0.00672556	-6.64016e-05	-0.002722	-0.00572062	2.27801e-06	-3.62638e-05	-0.0172029	0.00271544	1.88053e-05	-0.000823032	8.11997e-09	0.00159258	-4.63566e-07	0.00185005	0.000505269	0.00118739	0.00026596
AAAGAACCAACAAGAT.1	-0.00384954	-0.00127667	-0.0538667	-0.00482496	0.00565206	0.00290812	0.00108847	0.00243166	-0.000252375	0.00116736	-0.00133414	-0.00368482	-0.00117612	0.00204705	-0.00368275	-0.0615889	0.00529563	1.50427e-05	0.000132961	0.00432038	-0.00313989	0.00578014	0.00208048	-0.00562362	0.00412531	6.21397e-05	0.0454203	-0.000324471	-0.00121266	-0.0084468	0.0115191	-0.0370658	-0.0065054	-6.43358e-05	-0.002722	-0.0038361	-2.32086e-06	-4.4683e-05	-0.00823328	0.00261097	2.3324e-05	-0.00102226	8.11997e-09	0.00119935	-3.03308e-06	0.00184933	0.000440866	0.0011875	0.000265963
AAAGAACGTGCGGCTT.1	-0.0182697	0.000242144	-0.0489512	-0.000228178	0.0177187	0.00291606	0.00113195	0.00718126	-0.000294102	0.00730798	-0.00141871	-0.00604705	-0.0011725	-0.00693837	-0.00728116	-0.0343981	0.00529284	1.60113e-05	0.00013453	-0.00516948	-0.00470125	0.00588983	0.00224636	-0.00543857	0.00404059	6.91563e-05	0.101077	-0.000372557	-0.00170757	-0.0151839	0.0164048	-0.155108	-0.00943535	-8.78103e-05	-0.0027226	-0.0113206	5.96419e-06	-3.59938e-05	-0.0159746	0.00256523	1.3696e-05	0.00170606	8.49832e-09	0.00171537	2.25846e-08	0.001848	0.000541389	0.00105114	0.000265732
AAAGAACGTGCTTCAA.1	-0.0141704	0.000499597	-0.0954144	-0.000407132	0.0146256	0.00298635	0.00116818	0.00255064	-0.000294467	0.00193883	-0.00143542	-0.00452579	-0.00113046	-0.0108486	-0.00617985	-0.0472366	0.0052461	1.67079e-05	0.000134217	0.00275657	-0.00521338	0.00587665	0.00217133	-0.00550164	0.00404387	5.18598e-05	0.0881552	-0.000368668	-0.00206216	-0.0177189	0.0175564	-0.131516	-0.0114431	-8.30154e-05	-0.00272426	-0.00896102	1.78628e-06	-2.08057e-05	-0.0152587	0.0025824	1.43368e-05	0.00196607	9.57516e-09	0.00206878	4.33065e-08	0.00184154	0.000602856	0.00100195	0.000264298
AAAGGATAGCGACAGT.1	-0.0077322	-0.00146113	-0.0955237	-0.00323728	0.015294	0.00311859	0.00110446	0.000877202	-0.000295922	0.00114836	-0.00106265	-0.00407312	-0.00116548	-0.00879764	-0.00405817	-0.029361	0.00527363	3.1963e-05	0.00013311	-0.00146853	-0.00337437	0.00588455	0.00255234	-0.00550403	0.0040547	5.14165e-05	0.0944145	-0.000330402	-0.00216909	-0.0181353	0.021637	-0.0731118	-0.0107529	-8.06755e-05	-0.00272221	-0.0143855	5.99772e-06	-2.67178e-05	-0.0139189	0.00258487	1.54227e-05	0.00170941	1.16415e-08	0.00216543	7.79983e-09	0.00183971	0.000709578	0.00117223	0.000262024
AAAGGTACACGAGAAC.1	-0.00363603	-0.00126648	-0.0503963	-0.00313668	0.00333294	0.00290917	0.00107814	0.00471742	-0.000251518	0.00116985	-0.00133455	-0.00364317	-0.0011761	0.000980577	-0.00367899	-0.0387172	0.00529616	1.45733e-05	0.000133	0.00434025	-0.00312262	0.00577662	0.00208678	-0.00559409	0.00412879	6.97672e-05	0.0378259	-0.000324389	-0.00111768	-0.00779056	0.00934989	-0.0224418	-0.00593441	-6.4268e-05	-0.002722	-0.00428575	9.89065e-07	-4.86653e-05	-0.0060057	0.00258107	2.47695e-05	-0.00106995	8.14907e-09	0.00110784	-8.20938e-06	0.0018502	0.000472262	0.00118758	0.000265963
AAAGGTAGTGTACATC.1	-0.0035475	-0.00127045	-0.04772	-0.00160076	0.00407632	0.0029137	0.0010769	0.00465564	-0.000249724	0.00117061	-0.00133494	-0.00362519	-0.00117617	-0.000137635	-0.00367298	-0.0374657	0.0052964	1.44579e-05	0.000133023	0.00340949	-0.00311512	0.00577163	0.00209224	-0.00558573	0.00413375	7.53999e-05	0.0323246	-0.000324449	-0.00109186	-0.00736022	0.00906785	-0.0131875	-0.00625303	-6.42948e-05	-0.002722	-0.00400689	-1.97627e-06	-4.98779e-05	-0.00572407	0.00257263	2.51718e-05	-0.00108566	8.14907e-09	0.0010821	-8.85385e-06	0.00185052	0.000454754	0.0011876	0.000265963
AAAGGTATCTCTGCCA.1	-0.00325055	-0.00126829	-0.026417	0.000380849	-0.00135003	0.00290593	0.001074	0.00588907	-0.000247784	0.00117452	-0.0013324	-0.00357423	-0.00117612	-0.000977535	-0.00366335	-0.0205025	0.00529678	1.48527e-05	0.000133077	0.00260991	-0.0030941	0.00576422	0.00208339	-0.00557144	0.00414056	0.000131743	-0.000308178	-0.000324277	-0.00100102	-0.00617919	0.0068002	0.0202288	-0.00707857	-6.38287e-05	-0.002722	-0.00279818	-4.02518e-06	-5.16437e-05	0.00173455	0.00255829	2.88039e-05	-0.00108606	8.14907e-09	0.00100046	-1.44625e-05	0.00185695	0.000416026	0.00118811	0.000265956
AAAGTCCAGTCACTAC.1	-0.00347296	-0.00126432	-0.0533188	-6.9038e-05	0.000361262	0.00291187	0.00106887	0.0051094	-0.00025199	0.00117154	-0.00132425	-0.00366827	-0.00117611	-0.00129602	-0.00367708	-0.0435761	0.00529661	1.48043e-05	0.000132989	0.0033167	-0.00310903	0.00576251	0.0021673	-0.00558718	0.00412743	0.000110533	0.0169558	-0.000324784	-0.00113541	-0.00703094	0.00784547	-0.00550845	-0.00774454	-6.46912e-05	-0.00270424	-0.00300515	-3.79048e-06	-5.03119e-05	-0.000570029	0.00257812	2.68593e-05	-0.00105373	8.14907e-09	0.0011335	-9.87458e-06	0.00184448	0.000414535	0.00118758	0.000265963
AAATGGACAATTTCGG.1	-0.00369255	-0.00124827	-0.0448795	-0.00333238	0.00418621	0.00291065	0.00107699	0.00542543	-0.000250175	0.00116896	-0.00133782	-0.00362403	-0.00117616	0.00130819	-0.0036805	-0.0344296	0.0052961	1.45808e-05	0.00013301	0.00391841	-0.00313437	0.00577827	0.00208372	-0.00558651	0.00412788	7.16373e-05	0.0333369	-0.00032456	-0.0011085	-0.00764012	0.00946952	-0.0328723	-0.00586989	-6.44415e-05	-0.00272207	-0.00476691	2.85916e-06	-4.94607e-05	-0.00701675	0.00257384	2.39089e-05	-0.00109167	8.14907e-09	0.00109726	-9.48156e-06	0.00184833	0.000513122	0.00118759	0.000265941
AACAAAGGTATGAGAT.1	-0.00499646	-0.00113716	-0.10029	0.00112386	0.00433408	0.00290576	0.00108979	0.00497695	-0.000268633	0.00149849	-0.00133722	-0.00420125	-0.00114265	-0.00433891	-0.00421125	-0.0356961	0.00526155	1.45435e-05	0.000133364	0.00200174	-0.0032517	0.00579212	0.00212998	-0.00555378	0.00411769	0.000117417	0.0627086	-0.000336094	-0.00132994	-0.00939538	0.00927869	-0.0498357	-0.00775622	-6.81734e-05	-0.00272267	-0.00543958	1.16974e-06	-4.64413e-05	-0.00365549	0.00255877	2.43597e-05	-0.000784796	8.14907e-09	0.00133148	-7.20075e-06	0.00185571	0.000427097	0.00117773	0.00026533
AACAAAGGTCGAATGG.1	-0.00899457	-0.00143052	-0.0465335	-0.0168403	0.0194528	0.00307596	0.00115223	-1.10809e-05	-0.000285573	0.00110698	-0.00137631	-0.00353459	-0.00116439	0.00514064	-0.00388613	-0.0692064	0.00527792	1.69501e-05	0.000132829	0.0176189	-0.00349491	0.00586786	0.00226763	-0.00591727	0.00404634	3.32017e-06	0.0584114	-0.000330118	-0.00219022	-0.0171504	0.0255354	-0.136614	-0.00366781	-7.19382e-05	-0.00272195	-0.0125401	1.22897e-05	-2.22866e-05	-0.0333781	0.00291307	1.22683e-05	-0.00121993	1.86265e-09	0.00218286	2.07219e-08	0.00184852	0.000734359	0.0011871	0.000265885
AACAAAGTCGTCTAAG.1	-0.00901621	-0.00192622	-0.0404811	-0.026632	0.00361716	0.00336456	0.00132957	0.00302729	-0.000290493	0.00106093	-0.00139493	-0.0032053	-0.00117566	0.0119783	-0.00407889	-0.0857855	0.00528538	2.44007e-05	0.000132995	0.0518695	-0.00383346	0.00588052	0.00245882	-0.00586651	0.00403589	-2.61404e-05	0.0121759	-0.000333762	-0.00295371	-0.0196038	0.0312959	-0.136291	-0.00731949	-7.77079e-05	-0.00272206	-0.0131293	1.42921e-05	-1.59619e-05	-0.0596782	0.00286764	1.19326e-05	-0.00192089	-4.88944e-08	0.00293942	2.41445e-07	0.00202759	0.00113356	0.00120328	0.000265952
AACACACCATGTGACT.1	-0.00444256	-0.00129722	-0.0672326	-0.0129616	0.0119879	0.00292017	0.00110417	0.00199655	-0.000259983	0.00115984	-0.00133801	-0.00366791	-0.00117493	0.00857748	-0.00373194	-0.0921594	0.00529422	1.5866e-05	0.000132883	0.00583213	-0.00320065	0.00579453	0.00209219	-0.00565568	0.00411373	3.34159e-05	0.0607136	-0.000325082	-0.00143511	-0.0100098	0.0138603	-0.072758	-0.00625047	-6.58038e-05	-0.002722	-0.00479177	2.19978e-06	-3.95048e-05	-0.0171894	0.00264329	2.01277e-05	-0.000950899	8.03266e-09	0.0014187	-1.54483e-06	0.00185286	0.000472412	0.00118717	0.000265963
AACCACAGTATAGCTC.1	-0.00398627	-0.00140929	-0.0508495	-0.00803668	0.00860327	0.00305117	0.001099	0.0043909	-0.000251145	0.0011668	-0.00129824	-0.00361418	-0.00117609	0.00528751	-0.00368353	-0.0586789	0.00529651	1.45026e-05	0.000132989	0.00491468	-0.00317502	0.00579558	0.00213498	-0.00559747	0.0041123	4.88795e-05	0.0387174	-0.000324903	-0.00118786	-0.00831948	0.0121497	-0.0415723	-0.00600974	-6.49138e-05	-0.002722	-0.00427055	8.27014e-07	-4.90304e-05	-0.0142273	0.00258427	2.15806e-05	-0.00112557	8.09086e-09	0.00117324	-7.17328e-06	0.00185128	0.000532001	0.00118753	0.000265837
AACCACATCCAGGACC.1	-0.00709558	-0.00143995	-0.094901	-0.00744722	0.0152273	0.00308291	0.00109282	-0.000661726	-0.000283706	0.00113688	-0.00127259	-0.00389674	-0.0011577	-0.00258977	-0.00388879	-0.0489692	0.00527582	2.15918e-05	0.000133101	0.00397031	-0.00332818	0.0058606	0.00217033	-0.0056674	0.00405427	3.06182e-05	0.0947371	-0.000332644	-0.00199068	-0.0159263	0.0224602	-0.0848206	-0.00880158	-7.48706e-05	-0.00271987	-0.0102973	3.81842e-06	-2.4166e-05	-0.020927	0.00266922	1.60076e-05	-0.000122443	8.84756e-09	0.00198939	5.07571e-08	0.00184439	0.000634655	0.0011749	0.000265449
AACCACATCTGGGCGT.1	-0.00335034	-0.00125846	-0.037502	-0.00176042	-0.00111397	0.00290714	0.00106845	0.00490793	-0.000252075	0.00117351	-0.00132896	-0.00365114	-0.00117617	0.000263911	-0.00367011	-0.0275023	0.00529658	1.45398e-05	0.000132987	0.00342076	-0.00309983	0.00576213	0.00208096	-0.005575	0.00413533	0.00011879	0.0246555	-0.000324389	-0.00110768	-0.00714958	0.00787733	0.0111946	-0.00706609	-6.44395e-05	-0.002713	-0.00286572	-3.63961e-06	-4.95687e-05	0.000943929	0.0025631	2.76566e-05	-0.00106055	8.14907e-09	0.00110396	-1.1188e-05	0.00184349	0.000414461	0.00118777	0.000265962
AACCATGGTTCACCGG.1	-0.00348485	-0.00126731	-0.035733	-0.00217154	0.00351563	0.00292055	0.00108405	0.00582796	-0.000248739	0.00117019	-0.00133497	-0.00358427	-0.00117153	0.000359198	-0.00367771	-0.0392388	0.00529138	1.44616e-05	0.000133028	0.00432932	-0.00314095	0.00577616	0.00209286	-0.00559466	0.00413017	7.74451e-05	0.0299787	-0.000324486	-0.00109757	-0.00738242	0.00899744	-0.0205706	-0.00611684	-6.42665e-05	-0.002722	-0.00432554	1.76951e-06	-4.75831e-05	-0.00676149	0.00258191	2.46093e-05	-0.00109827	8.09086e-09	0.00108702	-1.10238e-05	0.00184635	0.000507981	0.00118766	0.00026588
AACCATGTCCGTACGG.1	-0.060908	0.00840837	0.0677699	-0.00509366	-0.0134423	0.00495399	0.000556896	0.0276065	-0.00193699	0.00513428	-0.00342843	-0.00359599	0.000851218	-0.03842	-0.0270107	0.019497	0.00275969	0.000475686	0.000136359	-0.0116788	-0.0188334	0.0107039	0.0077887	-0.00430545	0.00133446	-0.000520792	-0.0936047	-0.000530859	-0.00531144	-0.0459903	0.0813717	0.497861	-0.0324006	-0.00020041	-0.00272407	-0.0674236	0.000533164	0.000218434	-0.00565308	0.00293082	-9.81763e-05	0.0101021	8.40111e-07	0.00542611	0.00065288	0.0016987	0.00611722	0.000208017	0.000129493
AACCCAACAGACCTGC.1	-0.00412291	-0.00132889	-0.0366009	-0.011365	0.00648505	0.00297843	0.00109793	0.00635639	-0.000250664	0.0011646	-0.00133362	-0.00360059	-0.00117611	0.00846856	-0.00371307	-0.0537948	0.00529618	1.47112e-05	0.000132989	0.00541741	-0.00317084	0.00579177	0.00216168	-0.00559713	0.00411618	4.45377e-05	0.0394161	-0.00032506	-0.00120107	-0.00846092	0.0113596	-0.0522606	-0.00572847	-6.50873e-05	-0.002722	-0.00532168	4.02518e-06	-4.74975e-05	-0.0129746	0.00258435	2.08616e-05	-0.00109316	8.11997e-09	0.00118655	-8.02474e-06	0.00185328	0.000566661	0.00118749	0.00026595
AACCTTTCAAGGCTTT.1	-0.0180373	0.001133	-0.0503828	-0.0041459	0.0294301	0.00346981	0.00125487	0.00148492	-0.000297509	0.00140622	-0.00129127	-0.00391745	-0.00102931	-0.016186	-0.00567115	-0.013165	0.00509768	2.99998e-05	0.000134623	-0.00989939	-0.00674139	0.00593159	0.00250411	-0.00538239	0.00403109	1.01831e-05	0.0827917	-0.000370888	-0.00264779	-0.025917	0.0346953	-0.094536	-0.0152565	-0.000112162	-0.00272491	-0.0296659	1.25077e-05	-1.56034e-05	-0.0272908	0.00267652	1.20658e-05	0.00563186	1.32713e-08	0.00261881	1.47615e-05	0.00180213	0.00200053	0.00107002	0.000250064
AACGAAAAGACTAAGT.1	-0.00345058	-0.00126497	-0.0445644	-0.00223932	0.000543831	0.00291355	0.00107192	0.00456952	-0.000253754	0.00117198	-0.00133086	-0.00366744	-0.00117617	0.000381876	-0.0036739	-0.0337571	0.0052964	1.44951e-05	0.000132989	0.00414967	-0.00311677	0.00577487	0.00208026	-0.0055839	0.00413024	8.77418e-05	0.0311945	-0.000324389	-0.00111372	-0.00752107	0.00876461	-0.00330076	-0.00662208	-6.42483e-05	-0.0027216	-0.00352752	-2.35997e-06	-4.80879e-05	-0.00222453	0.00257118	2.6457e-05	-0.00107643	8.14907e-09	0.00110624	-9.56189e-06	0.00184269	0.00043802	0.00118751	0.000265962
AACGAAAAGACTCCGC.1	-0.00360265	-0.00127742	-0.0416501	-0.00331487	0.00458602	0.00291751	0.00109488	0.00565597	-0.000249288	0.00116936	-0.00132644	-0.00354901	-0.00117614	0.0010012	-0.00368259	-0.0435576	0.00529587	1.45994e-05	0.000132982	0.00414726	-0.00313177	0.00578151	0.002081	-0.0055974	0.00412508	7.09332e-05	0.0342518	-0.000324508	-0.00113007	-0.00784271	0.00962461	-0.0319841	-0.00584728	-6.43794e-05	-0.00272247	-0.00444856	5.55906e-06	-4.83524e-05	-0.00671589	0.00258375	2.34842e-05	-0.00110064	8.14907e-09	0.00111948	-9.56724e-06	0.00184642	0.000505775	0.00118755	0.000265801
AACGAAACAACCACAT.1	-0.00947338	-0.00109782	-0.0148877	-0.0107509	0.00451239	0.00309054	0.00152181	0.0107879	-0.000273164	0.0010941	-0.00134379	-0.00339229	-0.00117579	0.000985535	-0.00397731	-0.105086	0.00529133	1.72891e-05	0.000132889	0.0284031	-0.00385602	0.00585736	0.00245897	-0.00589818	0.00405668	1.72292e-06	0.066748	-0.000328502	-0.00173204	-0.0146898	0.0229283	-0.155636	-0.0024542	-7.12833e-05	-0.002722	-0.0150888	9.16794e-06	-2.22418e-05	-0.0332029	0.00289942	1.20453e-05	-0.00152573	-3.86499e-08	0.00172631	-2.56347e-07	0.00184989	0.000898719	0.00118602	0.000265909
AACGGGACATCCGAGC.1	-0.0106526	-0.000719316	-0.0871324	0.000311561	0.0114601	0.00291646	0.00112489	0.00620872	-0.000280887	0.00165307	-0.00140068	-0.00479119	-0.00115844	-0.00794437	-0.00457705	-0.0338216	0.00527814	1.44877e-05	0.000134183	-0.00171451	-0.00376793	0.00585442	0.00210387	-0.00550796	0.00406523	7.60388e-05	0.103861	-0.0003537	-0.00182226	-0.0143934	0.0133453	-0.103405	-0.00961323	-7.91388e-05	-0.00272201	-0.00896472	5.12879e-06	-3.65265e-05	-0.00921822	0.00256311	1.63e-05	0.000122495	8.17818e-09	0.00182805	-3.44589e-08	0.00185131	0.000483856	0.00113495	0.000265628
AACTTCTAGCGTGTTT.1	-0.0089819	-0.00149833	-0.0104383	-0.00698184	0.00590027	0.00328438	0.00214069	0.0124173	-0.000261044	0.00112795	-0.00124166	-0.00364517	-0.00117594	-0.00182225	-0.00377143	-0.120746	0.0052922	1.49049e-05	0.00013301	0.0271983	-0.00333397	0.00584618	0.00273267	-0.00577211	0.00405541	4.275e-06	0.057184	-0.000326363	-0.00152909	-0.0133744	0.0192275	-0.111692	-0.00431546	-6.86538e-05	-0.00272209	-0.0156101	3.82029e-06	-2.06996e-05	-0.0317093	0.00277022	1.215e-05	-0.00156762	-6.28643e-09	0.00152394	-1.50851e-06	0.0018407	0.00123294	0.0011875	0.000265652
AAGAACAAGTTGCCTA.1	-0.0148924	0.000882434	-0.0871683	0.000368172	0.0215349	0.00301957	0.00120851	0.00108136	-0.000296747	0.0016128	-0.00138768	-0.00444924	-0.00112566	-0.0137381	-0.00620346	-0.040085	0.00523449	1.75536e-05	0.000134487	-0.000465007	-0.00573966	0.00589319	0.00220451	-0.00546207	0.004036	4.37554e-05	0.0935921	-0.000371305	-0.00216284	-0.0197147	0.022282	-0.15121	-0.0129154	-8.95588e-05	-0.00272237	-0.0127432	1.5609e-06	-2.30931e-05	-0.0186022	0.00259227	1.36923e-05	0.00408537	9.1386e-09	0.00217856	1.13551e-06	0.00182344	0.000894472	0.000933304	0.00026219
AAGACTCAGATCCAAA.1	-0.0211039	0.000998034	-0.0694102	-0.00421517	0.020696	0.00311367	0.0012402	-0.00155004	-0.000298218	0.00168096	-0.00139082	-0.00407017	-0.000661858	-0.0150377	-0.0147774	-0.0262279	0.00475967	1.62683e-05	0.000136565	0.00447524	-0.00624533	0.00588563	0.00248	-0.00537875	0.00402384	1.15093e-05	0.053606	-0.000398358	-0.00279541	-0.0250463	0.0303616	-0.15481	-0.0229251	-0.000102768	-0.00272381	-0.00872436	7.22613e-06	-7.83149e-06	-0.0285044	0.00266252	1.2021e-05	0.00822454	1.00117e-08	0.0028642	1.33319e-05	0.00182316	0.000866055	0.00057657	0.000258885
AAGCCATAGACTGGGT.1	-0.0141861	0.00203659	-0.0770574	-0.00136097	0.0221929	0.00302691	0.00119861	-0.000576144	-0.000297027	0.00150547	-0.00145197	-0.00418338	-0.0011163	-0.0137384	-0.00568825	-0.0238657	0.00521212	2.82954e-05	0.000133783	-0.00303439	-0.00696676	0.00590605	0.00234512	-0.00547875	0.00403451	2.90163e-05	0.105348	-0.000353908	-0.00215077	-0.0211466	0.0263925	-0.139119	-0.0146816	-9.13525e-05	-0.00272272	-0.0214224	6.08456e-06	-2.49483e-05	-0.0227188	0.00260975	1.29752e-05	0.00393492	1.25729e-08	0.00216672	2.88431e-06	0.0018023	0.00156255	0.00108162	0.000258382
AAGCCATAGACTTGTC.1	-0.00525861	-0.00135615	-0.0674322	-0.0103989	0.0089019	0.00297131	0.00108747	0.00521158	-0.000271071	0.00115484	-0.00133897	-0.00368785	-0.00117603	0.00465312	-0.0037997	-0.0821382	0.00529361	1.53668e-05	0.000133282	0.0109199	-0.00320801	0.00581585	0.00221129	-0.00574841	0.00409409	2.16961e-05	0.0515627	-0.000325395	-0.00176378	-0.0114175	0.0135959	-0.0723263	-0.00605544	-6.65704e-05	-0.00272212	-0.00608891	2.86847e-07	-3.58988e-05	-0.0181781	0.00274019	1.78199e-05	-0.000996012	7.85803e-09	0.00174745	-6.49598e-07	0.00185701	0.000583217	0.00118776	0.000265962
AAGCCATTCTGACAGT.1	-0.0155202	-0.000286564	-0.0861492	0.00172213	0.00800852	0.00301659	0.00112729	0.00250904	-0.000298059	0.00371943	-0.00130455	-0.00569958	-0.00115607	-0.00882222	-0.01302	-0.0573062	0.00527462	1.4849e-05	0.000134882	0.00651503	-0.00432033	0.0058728	0.00301016	-0.00545132	0.00404974	6.92159e-05	0.087322	-0.000365822	-0.00185051	-0.0147697	0.0173651	-0.145479	-0.00892152	-8.33706e-05	-0.00272358	-0.00902656	3.33041e-06	-2.57995e-05	-0.0164567	0.00256263	1.30581e-05	0.00106873	8.14907e-09	0.00185219	-4.3097e-07	0.00184689	0.000504553	0.00108754	0.00026506
AAGCGTTGTCTACATG.1	-0.00362868	-0.00124301	-0.057533	-0.000497108	0.00389615	0.00290795	0.00108208	0.00407576	-0.000252781	0.00117072	-0.00133249	-0.0036342	-0.00117605	-0.00192563	-0.00367664	-0.0383519	0.00529592	1.4443e-05	0.000132984	0.00272047	-0.00313912	0.00577016	0.00208541	-0.00560972	0.00413487	7.74004e-05	0.0509597	-0.000324322	-0.00112832	-0.00805086	0.00975937	-0.0124351	-0.0062031	-6.41168e-05	-0.002722	-0.00366238	-2.62447e-06	-4.92074e-05	-0.00491491	0.00259653	2.54959e-05	-0.00104496	8.14907e-09	0.00111748	-5.60377e-06	0.00183751	0.000430256	0.0011876	0.000265963
AAGGAATTCACCTGGG.1	-0.00318104	-0.00128448	-0.0239107	0.000707394	-0.00113169	0.00290416	0.00107058	0.00593754	-0.000247627	0.00117483	-0.00133544	-0.00359268	-0.00117616	-0.00121637	-0.00366193	-0.0132329	0.00529685	1.45286e-05	0.000133082	0.00233321	-0.00308935	0.00576368	0.00208791	-0.0055692	0.00414132	0.000136092	-0.00149249	-0.000324262	-0.00100376	-0.00611396	0.00670693	0.0226872	-0.00705405	-6.37858e-05	-0.002722	-0.00278783	-4.10899e-06	-5.16381e-05	0.00161514	0.00255594	2.90908e-05	-0.00109034	8.14907e-09	0.00100548	-1.51368e-05	0.00187527	0.000412285	0.00118864	0.000265941
AAGTCGTTCAAATAGG.1	-0.0038758	-0.00125663	-0.059047	-0.00340597	0.00349929	0.00290437	0.00107729	0.00330834	-0.000254286	0.00116761	-0.00133869	-0.00370075	-0.00117613	0.000443963	-0.00368719	-0.0472007	0.00529584	1.45063e-05	0.000133	0.0044608	-0.00313044	0.00577666	0.00213958	-0.00560506	0.004129	6.74073e-05	0.0541502	-0.000324471	-0.00120756	-0.00865087	0.0106869	-0.0305067	-0.00557837	-6.44736e-05	-0.002722	-0.00431323	1.49012e-06	-4.6609e-05	-0.00579336	0.00259221	2.38158e-05	-0.00102378	8.14907e-09	0.00119379	-5.17699e-06	0.00184462	0.000444636	0.00118767	0.000265963
AAGTGAAAGGAGTATT.1	-0.00369766	-0.00125192	-0.0577896	-0.00154364	0.00372756	0.00290777	0.0010834	0.00378082	-0.000252725	0.0011698	-0.00133298	-0.00363889	-0.00117608	-0.000962785	-0.00367566	-0.0426627	0.00529588	1.44504e-05	0.000132998	0.00326692	-0.00313524	0.0057718	0.00209234	-0.00561079	0.00413334	6.99628e-05	0.0486619	-0.000324337	-0.00114556	-0.00813599	0.0101228	-0.0181061	-0.00608226	-6.41686e-05	-0.002722	-0.00369692	-2.19606e-06	-4.79389e-05	-0.00531134	0.00259759	2.49669e-05	-0.00103556	8.14907e-09	0.0011343	-5.24218e-06	0.00183969	0.00043036	0.00118759	0.000265963
AAGTTCGCAACCGCTG.1	-0.0181312	0.000442322	-0.053822	7.11409e-05	0.0135275	0.00294778	0.00113727	0.00675115	-0.000293227	0.00509761	-0.00141535	-0.00564748	-0.00117031	-0.00834337	-0.0111241	-0.0365337	0.00528714	1.63726e-05	0.00013461	-0.00143553	-0.00500697	0.00590133	0.00260027	-0.00542875	0.00403684	5.65927e-05	0.0869431	-0.00038155	-0.00179444	-0.0158803	0.0167004	-0.171116	-0.00982338	-9.11015e-05	-0.00272285	-0.0107055	5.82449e-06	-3.16836e-05	-0.0156185	0.00257871	1.25812e-05	0.00282484	8.67294e-09	0.00180352	2.18861e-08	0.00184769	0.000593349	0.000988952	0.00026451
AAGTTCGCACACGGAA.1	-0.0104144	-0.00135343	-0.0268034	-0.0144094	0.0141549	0.00309304	0.00119569	0.00346555	-0.000282401	0.00108933	-0.00136578	-0.00341626	-0.00117417	0.0030498	-0.00397862	-0.0820305	0.00528758	2.04965e-05	0.000132723	0.0238237	-0.00362254	0.00587084	0.00240808	-0.0060215	0.00404517	-9.6485e-07	0.0632869	-0.000330379	-0.0020336	-0.0166379	0.0249669	-0.148364	-0.00136976	-7.35878e-05	-0.00272157	-0.0158364	1.1025e-05	-2.19755e-05	-0.0344703	0.00302155	1.20476e-05	-0.00138972	-1.90921e-08	0.00202567	6.40284e-09	0.00185169	0.000856593	0.00118491	0.000265839
AAGTTCGGTACGATGG.1	-0.00756127	-0.00168337	-0.0808505	-0.0114192	0.0144007	0.0032706	0.00109996	-0.00658678	-0.000295185	0.00110698	-0.00128067	-0.00383293	-0.00116327	-0.00342699	-0.00389034	-0.0518074	0.00527722	2.94168e-05	0.000132751	0.0169853	-0.0033805	0.005881	0.00224423	-0.005778	0.00404146	8.74139e-06	0.0578013	-0.000330424	-0.00256509	-0.0206578	0.0322457	-0.109131	-0.0089391	-7.69822e-05	-0.00272091	-0.0142853	9.58704e-06	-1.53263e-05	-0.0284831	0.00280748	1.24117e-05	0.00010718	1.13796e-08	0.00254786	1.43284e-06	0.00185858	0.00082095	0.00118577	0.000265747
AATAGAGAGAATCGTA.1	-0.00514117	-0.00131758	-0.104082	-0.00152777	0.00844545	0.00301677	0.00108485	0.00155551	-0.000281712	0.00116014	-0.00114272	-0.0040457	-0.00117455	-0.00535997	-0.00397346	-0.0353407	0.00529405	2.51215e-05	0.000133406	0.00222853	-0.00326211	0.00583808	0.00215667	-0.00554721	0.00408504	7.41873e-05	0.0822781	-0.000325641	-0.00167067	-0.0129597	0.0133587	-0.034534	-0.00847771	-7.15879e-05	-0.00272233	-0.00738555	9.94653e-07	-3.88008e-05	-0.00270996	0.00257756	2.08877e-05	0.00036389	9.77889e-09	0.00167034	-7.59959e-07	0.0018234	0.000476137	0.00118177	0.000265378
AATAGAGAGGAAGAAC.1	-0.00702243	-0.000829521	-0.0883824	0.000399726	0.00615573	0.00291011	0.00110829	0.00682555	-0.000273955	0.00143039	-0.00136018	-0.00417778	-0.00116976	-0.00585531	-0.00431796	-0.027965	0.00528842	1.45584e-05	0.000133861	-0.000826103	-0.003588	0.00582253	0.00207883	-0.00553925	0.00409147	0.000100382	0.0895441	-0.000342866	-0.00149313	-0.0116067	0.0102353	-0.0674567	-0.0100796	-7.20118e-05	-0.0027224	-0.00791845	5.81914e-06	-4.16655e-05	-0.00451732	0.00256507	2.02265e-05	-0.000541102	8.17818e-09	0.00149334	-1.16369e-06	0.00185138	0.00047195	0.00115377	0.000265434
AATCACGGTCCCTAAA.1	-0.00392035	-0.00127776	-0.0329883	-0.0119748	0.00404601	0.00293581	0.00109169	0.00641562	-0.000250844	0.0011651	-0.00134415	-0.00359878	-0.00117614	0.00908126	-0.00372974	-0.0487183	0.00529618	1.52364e-05	0.000132978	0.00633794	-0.00315676	0.00578597	0.00211533	-0.00561538	0.00412116	4.97028e-05	0.0402253	-0.000324858	-0.00118586	-0.00846785	0.0112172	-0.0544872	-0.00553993	-6.48559e-05	-0.00272216	-0.00535929	5.32996e-06	-4.82779e-05	-0.0104025	0.00260174	2.08896e-05	-0.00106967	8.11997e-09	0.00117171	-7.98772e-06	0.00184845	0.000548825	0.00118753	0.000265954
AATCACGTCTCTGAGA.1	-0.0158842	-7.20117e-05	-0.0786716	-0.000249523	0.0181789	0.00293634	0.00112451	0.00587666	-0.000292895	0.00194481	-0.00137193	-0.00463521	-0.00116641	-0.0094249	-0.00623765	-0.0289412	0.00528665	1.47112e-05	0.000134425	-0.00280529	-0.00447889	0.00587761	0.00217236	-0.00545247	0.00404401	5.1396e-05	0.102428	-0.000365777	-0.00193402	-0.0162747	0.0170306	-0.153624	-0.0111477	-8.42274e-05	-0.002722	-0.0113321	5.87944e-06	-2.6891e-05	-0.019075	0.00257443	1.34297e-05	0.00189948	8.20728e-09	0.00194227	2.04891e-08	0.00184733	0.000546694	0.00102006	0.000265492
AATCGACGTTCATCGA.1	-0.00425532	-0.00126669	-0.0468509	-0.00806614	0.00518642	0.00291141	0.00108545	0.00439958	-0.000254041	0.00116453	-0.00134358	-0.00366023	-0.00117606	0.00495153	-0.00370464	-0.0512026	0.00529585	1.45845e-05	0.000132974	0.00598256	-0.00315578	0.0057838	0.00216947	-0.00559539	0.00412264	5.48661e-05	0.0507056	-0.000324747	-0.00125337	-0.00875303	0.0112759	-0.052902	-0.00545186	-6.49487e-05	-0.002722	-0.00528264	5.34579e-07	-4.6907e-05	-0.0100367	0.00258324	2.16831e-05	-0.00106946	8.09086e-09	0.00123639	-5.88456e-06	0.00184835	0.0005005	0.00118737	0.000265963
AATCGTGGTATCTCGA.1	-0.0035765	-0.00127835	-0.047102	-0.000452668	0.000525889	0.00292055	0.00107416	0.00547495	-0.000254564	0.00117338	-0.0013271	-0.00370566	-0.00117593	-0.000916537	-0.00372239	-0.0378094	0.00529646	1.44392e-05	0.000133369	0.0024629	-0.00310796	0.00577752	0.00207926	-0.00556575	0.00412888	0.000123443	0.0191097	-0.000324434	-0.0011414	-0.00708194	0.00739524	0.0111535	-0.0074933	-6.42949e-05	-0.002722	-0.0033552	-1.27591e-06	-5.05969e-05	-0.00024119	0.00255531	2.68295e-05	-0.00104072	8.14907e-09	0.00114184	-1.09421e-05	0.00185592	0.000414848	0.0011872	0.000265896
AATGACCAGAGGTCAC.1	-0.00328876	-0.00125689	-0.0366711	-0.00157857	-0.00124095	0.00290501	0.00107094	0.00512856	-0.000250083	0.00117366	-0.00132938	-0.00362317	-0.00117617	0.000344818	-0.00367282	-0.0277313	0.00529655	1.4957e-05	0.000133008	0.00339395	-0.0031004	0.00576314	0.00208222	-0.00557451	0.00413753	0.000119517	0.0165727	-0.000324359	-0.00107823	-0.006857	0.00776247	0.00989491	-0.00693214	-6.44834e-05	-0.00271636	-0.00280629	-3.46452e-06	-4.97326e-05	0.000779063	0.00256194	2.77422e-05	-0.00104895	8.14907e-09	0.00107363	-1.19181e-05	0.00184371	0.000415504	0.00118823	0.000265962
AATGGAAAGATGAATC.1	-0.0224743	0.00126278	-0.0535056	-0.00136838	0.0265892	0.00308342	0.00115377	0.00217895	-0.000298399	0.00211897	-0.0012732	-0.00461812	-0.00106808	-0.0165842	-0.00964854	-0.0223177	0.00514855	1.62981e-05	0.000135258	-0.00340791	-0.00613968	0.00590206	0.00233282	-0.00524104	0.00402859	2.0748e-05	0.101363	-0.000388136	-0.00264639	-0.0244175	0.027806	-0.193491	-0.0193522	-9.85567e-05	-0.00272199	-0.0168923	9.68389e-06	-4.48897e-06	-0.0308487	0.00259774	1.2028e-05	0.00278051	1.08266e-08	0.00274309	1.10478e-05	0.0018455	0.00065355	0.000612585	0.00025247
AATGGAACACCAACAT.1	-0.005514	-0.00134213	-0.045802	-0.0139171	0.0194413	0.00295533	0.00110423	0.00305539	-0.000259642	0.00116046	-0.00134377	-0.00359548	-0.00117235	0.00896222	-0.00371504	-0.0747936	0.0052916	1.44504e-05	0.00013298	0.00991928	-0.00319316	0.00579863	0.00210773	-0.00578013	0.00410768	3.04645e-05	0.0494091	-0.000324702	-0.00147302	-0.0105062	0.0144972	-0.0719381	-0.00808186	-6.49529e-05	-0.002722	-0.00658229	-2.31527e-06	-4.16767e-05	-0.0286807	0.00276762	1.92113e-05	-0.00123389	7.68341e-09	0.0014513	-6.5309e-07	0.00184657	0.000634462	0.00118688	0.000265962
AATGGAACATCATCCC.1	-0.0389415	0.00617322	0.0179404	-0.00558726	0.0056541	0.00431135	0.00138906	0.00430375	-0.0005337	0.00253074	-0.00114982	-0.00418071	-0.000773486	-0.0278647	-0.0173708	0.0113668	0.00470294	3.6642e-05	0.000135947	-0.00675504	-0.0139707	0.00653061	0.0037883	-0.00482853	0.0036824	-5.51045e-05	-0.00256954	-0.000448367	-0.00458543	-0.0377998	0.0596634	0.073721	-0.0324982	-0.000165507	-0.00272196	-0.0364048	0.00200451	1.99699e-05	-0.0180237	0.00274415	-1.00806e-05	0.0132911	1.77883e-07	0.0044756	0.000199383	0.0016919	0.00320089	0.000702354	0.00021521
AATGGAAGTGAGACGT.1	-0.00370985	-0.00125244	-0.0544957	-0.00146268	0.00424925	0.00290983	0.00108579	0.00346635	-0.000253198	0.00116966	-0.00133254	-0.00364628	-0.00117608	-0.0010396	-0.00367858	-0.0457114	0.00529577	1.44653e-05	0.000132989	0.00324307	-0.00314173	0.00577226	0.00208188	-0.0056172	0.00413266	7.06818e-05	0.048148	-0.000324329	-0.00114674	-0.00813848	0.0103459	-0.0207141	-0.00630603	-6.40923e-05	-0.002722	-0.00358453	-2.61143e-06	-4.79929e-05	-0.00575727	0.00260407	2.47508e-05	-0.00103708	8.14907e-09	0.00113479	-4.40027e-06	0.0018393	0.000431001	0.00118759	0.000265963
AATGGAATCGCTCTAC.1	-0.00375371	-0.00133881	-0.0469213	-0.00567301	0.00668437	0.00298051	0.00108929	0.00489421	-0.000250842	0.00116795	-0.00131626	-0.00360781	-0.00117611	0.00307282	-0.00368426	-0.0530091	0.00529642	1.45622e-05	0.000132982	0.00449868	-0.00314891	0.00578911	0.00211003	-0.0055932	0.00411865	5.99604e-05	0.0384165	-0.000324821	-0.00116563	-0.00818315	0.0112315	-0.0385724	-0.00590746	-6.48228e-05	-0.002722	-0.00424972	2.20723e-06	-4.82425e-05	-0.0111903	0.00257987	2.24523e-05	-0.00111755	8.11997e-09	0.00115305	-7.92043e-06	0.00184944	0.000515044	0.00118755	0.000265898
AATGGCTAGTGCAACG.1	-0.00330765	-0.00123772	-0.0363575	0.000509517	7.0828e-05	0.00290478	0.00107295	0.00597516	-0.000249471	0.00117407	-0.00133289	-0.00362054	-0.00117615	-0.00158311	-0.00367589	-0.0167927	0.00529681	1.47372e-05	0.000133034	0.00232354	-0.00311931	0.00576657	0.00209138	-0.00557148	0.00413824	0.000126407	0.0204595	-0.000324635	-0.00106134	-0.00669805	0.00699514	0.0152832	-0.00681675	-6.40217e-05	-0.00272201	-0.00312467	-4.01959e-06	-5.00027e-05	-1.31428e-05	0.00256057	2.83383e-05	-0.0010884	8.14907e-09	0.00105885	-1.34381e-05	0.00185603	0.000418335	0.00118735	0.000265956
AATGGCTGTTGTCATG.1	-0.00407734	-0.00126779	-0.0737888	-0.00544611	0.00425458	0.00291323	0.00107969	0.00259325	-0.000259063	0.00116605	-0.00133766	-0.00372022	-0.0011759	0.00185815	-0.00369786	-0.0573398	0.00529572	1.45808e-05	0.000132989	0.00627368	-0.0031464	0.00578491	0.00211516	-0.00563668	0.00412226	6.27488e-05	0.0567519	-0.000324694	-0.00130608	-0.00929284	0.0117476	-0.04074	-0.00625527	-6.54059e-05	-0.00272206	-0.00449374	2.58163e-06	-4.25614e-05	-0.00823978	0.0026245	2.31639e-05	-0.00101405	8.14907e-09	0.00129058	-2.7963e-06	0.00183869	0.000453249	0.00118765	0.000265962
AATGGCTTCCAAGCTA.1	-0.00345802	-0.00124885	-0.059404	0.000443981	-0.000188951	0.0029122	0.00107389	0.00515637	-0.000253639	0.00117289	-0.00132077	-0.00368468	-0.00117605	-0.00200642	-0.00369638	-0.0350772	0.0052966	1.51023e-05	0.000133079	0.00266898	-0.0031191	0.00577589	0.00208477	-0.00556895	0.00413101	0.000124207	0.0266069	-0.000324635	-0.00114221	-0.00725089	0.00766788	0.00675204	-0.00717822	-6.52206e-05	-0.00272133	-0.00314042	-3.28384e-06	-4.966e-05	0.000839561	0.00255992	2.72468e-05	-0.0010071	8.14907e-09	0.00114071	-9.09809e-06	0.00184567	0.000412494	0.00118738	0.000265962
AATTCCTAGAGTATAC.1	-0.00591411	-0.00136084	-0.0943149	-0.0113676	0.0114617	0.00297992	0.00108611	0.000387822	-0.000274833	0.00115069	-0.00131098	-0.00389419	-0.00117214	0.00364841	-0.00380619	-0.0638252	0.00529101	1.57095e-05	0.000133095	0.0062311	-0.0032539	0.00583705	0.00212917	-0.00574046	0.00407277	3.15066e-05	0.0917138	-0.000326512	-0.00177191	-0.013595	0.0186303	-0.0840159	-0.00771065	-6.87299e-05	-0.00272161	-0.00825939	1.38953e-06	-3.03332e-05	-0.0176128	0.00273535	1.79298e-05	-0.000536613	8.14907e-09	0.00176509	8.14907e-09	0.00184833	0.00054878	0.00118531	0.000265865
AATTCCTAGTAATCCC.1	-0.0118931	-3.86122e-05	-0.0711172	0.000993273	0.00926189	0.00293374	0.00110449	0.00631686	-0.000281884	0.00712473	-0.0013542	-0.00514951	-0.0011744	-0.00659471	-0.00775597	-0.0399009	0.00529471	1.50092e-05	0.00013422	-0.0017828	-0.00441441	0.00586712	0.00230053	-0.00544538	0.00405601	8.88947e-05	0.0863673	-0.00034528	-0.00153458	-0.0127249	0.013507	-0.139434	-0.0092378	-7.84608e-05	-0.00272227	-0.00948587	4.54672e-06	-4.04939e-05	-0.00976837	0.00255982	1.54413e-05	0.00125181	8.41101e-09	0.00153507	-6.01402e-07	0.00185066	0.000450402	0.00110542	0.000265611
AATTCCTTCCACGTCT.1	-0.00360202	-0.00127809	-0.0396874	-0.00409978	0.00453641	0.00292466	0.00108676	0.00590856	-0.000250014	0.0011692	-0.00133564	-0.00358688	-0.00117403	0.00189732	-0.00368592	-0.0419167	0.00529387	1.45212e-05	0.000133002	0.00416722	-0.00313972	0.00578026	0.0021044	-0.00559808	0.00412649	6.9486e-05	0.0355141	-0.000324598	-0.00113317	-0.00777084	0.00973472	-0.0303974	-0.00591987	-6.4463e-05	-0.002722	-0.00466308	3.97488e-06	-4.73186e-05	-0.00823224	0.00258554	2.38121e-05	-0.00109306	8.11997e-09	0.00112116	-9.6939e-06	0.00184536	0.000519767	0.0011876	0.000265894
AATTTCCCAAACTCTG.1	-0.00373979	-0.00124268	-0.0516711	-0.000984846	0.00365852	0.00290655	0.00108373	0.00410144	-0.00025178	0.00117072	-0.00133135	-0.00360409	-0.00117615	-0.00133528	-0.00366747	-0.0396182	0.00529626	1.4443e-05	0.000133008	0.00279592	-0.00313872	0.00577108	0.0020876	-0.00560027	0.00413426	7.12424e-05	0.04413	-0.000324307	-0.0011241	-0.00791696	0.0101176	-0.0112885	-0.00592695	-6.41942e-05	-0.002722	-0.00393669	-2.45683e-06	-4.89596e-05	-0.00510886	0.00258705	2.55853e-05	-0.00106554	8.14907e-09	0.00111539	-6.79214e-06	0.00184054	0.000444517	0.00118759	0.000265963
AATTTCCTCATTGAGC.1	-0.00396624	-0.00129966	-0.0353521	-0.0125287	0.00564734	0.00293602	0.00108848	0.00674114	-0.000249893	0.00116662	-0.00133994	-0.0036113	-0.00117609	0.00996472	-0.00370887	-0.0438191	0.005296	1.49794e-05	0.000133002	0.00506549	-0.0031337	0.00578513	0.00213885	-0.00559784	0.00412177	4.86653e-05	0.0348884	-0.000324747	-0.00117049	-0.00815497	0.0100655	-0.050812	-0.00577276	-6.48458e-05	-0.00272203	-0.00534698	4.17791e-06	-4.74006e-05	-0.0112824	0.0025848	2.20053e-05	-0.0010832	8.14907e-09	0.00115761	-8.61892e-06	0.0018536	0.00055176	0.00118728	0.000265956
AATTTCCTCTAGACCA.1	-0.00715136	-0.00145621	-0.0897219	-0.032218	0.0215963	0.00302558	0.0011487	0.00147078	-0.000274924	0.00113422	-0.00133647	-0.00350386	-0.0011756	0.0249334	-0.00379459	-0.106764	0.00529251	1.53817e-05	0.000132963	0.0157053	-0.00341459	0.00584067	0.00227554	-0.00586399	0.0040731	3.9665e-06	0.0415207	-0.000329239	-0.00194501	-0.0127051	0.0209192	-0.123393	-0.0067791	-6.93958e-05	-0.00272218	-0.0070248	3.78117e-06	-3.23001e-05	-0.0392438	0.00285051	1.4564e-05	-0.000905087	7.10133e-09	0.00193111	-9.96515e-08	0.00187401	0.000635043	0.00118738	0.000265947
ACAACCAAGACATCCT.1	-0.00454454	-0.00125856	-0.0452376	-0.00588797	0.0091974	0.00290666	0.001088	0.00302802	-0.000254236	0.00115991	-0.00134252	-0.00371128	-0.00117613	0.00182147	-0.00370243	-0.0625957	0.00529542	1.48155e-05	0.00013293	0.00573352	-0.00317606	0.00578598	0.0021357	-0.00563028	0.004121	4.31892e-05	0.064531	-0.000324806	-0.00138193	-0.00975365	0.0131205	-0.071351	-0.0050101	-6.51608e-05	-0.002722	-0.0056147	-8.47504e-07	-4.38541e-05	-0.0131241	0.0026203	1.9392e-05	-0.00105798	7.68341e-09	0.00136281	-2.84496e-06	0.00185387	0.000486746	0.0011874	0.000265963
ACAAGCTAGGCCCACT.1	-0.00593951	-0.00147052	-0.10469	-0.0079987	0.0139908	0.00308423	0.00107853	0.000322515	-0.000286389	0.00114219	-0.00115048	-0.00404369	-0.00117028	-0.00222899	-0.00386153	-0.0357066	0.00528948	2.25268e-05	0.00013312	0.00391645	-0.00324411	0.00585279	0.00217639	-0.00562243	0.00406348	4.34034e-05	0.0874577	-0.000326833	-0.00197224	-0.0162918	0.0204311	-0.0778908	-0.00937766	-7.19588e-05	-0.00272191	-0.0110006	4.58024e-06	-2.78763e-05	-0.0167445	0.00262822	1.61473e-05	0.000211265	9.08039e-09	0.00196973	7.45058e-09	0.00184529	0.000549436	0.00118029	0.000265624
ACAAGCTCAATAAGGT.1	-0.00320706	-0.00126582	-0.0256811	0.000653909	-0.000917201	0.00290403	0.00107113	0.00593644	-0.000247799	0.00117476	-0.0013321	-0.00358844	-0.00117615	-0.00124035	-0.00366315	-0.0138696	0.00529687	1.45957e-05	0.000133069	0.00232625	-0.00308949	0.00576392	0.00208395	-0.00556928	0.00414106	0.000135893	0.00171351	-0.000324285	-0.00100832	-0.0061862	0.00672624	0.0219653	-0.00700617	-6.37979e-05	-0.002722	-0.00281394	-4.10154e-06	-5.15189e-05	0.00141668	0.00255615	2.90088e-05	-0.00108898	8.14907e-09	0.00100937	-1.49244e-05	0.00185721	0.000412226	0.00118776	0.000265948
ACAAGCTCACTGGCGT.1	-0.00390162	-0.00125257	-0.0400362	-0.00485629	0.00430848	0.00291324	0.00108311	0.00511261	-0.000252647	0.00116719	-0.00134277	-0.00363538	-0.00117612	0.00237306	-0.00369322	-0.0406028	0.00529601	1.45249e-05	0.000132985	0.00446586	-0.00314317	0.00578206	0.00212263	-0.00558914	0.00412438	6.78618e-05	0.0408207	-0.000324717	-0.00117147	-0.00810156	0.0105184	-0.0402028	-0.00575744	-6.47395e-05	-0.00272203	-0.00493145	1.44355e-06	-4.79184e-05	-0.00800359	0.00257692	2.30148e-05	-0.00108944	8.14907e-09	0.00115757	-8.00448e-06	0.00184291	0.000514284	0.00118755	0.000265956
ACAAGCTGTTTAGAGA.1	-0.00409821	-0.00128493	-0.0284508	-0.0151248	0.00483894	0.00293895	0.001095	0.00735643	-0.000250298	0.00116352	-0.00134879	-0.00361006	-0.00117614	0.0121939	-0.00373092	-0.0497808	0.00529587	1.50092e-05	0.000132987	0.00578616	-0.00316296	0.00578793	0.00214506	-0.00560561	0.00411957	4.46886e-05	0.0405656	-0.000325149	-0.00121674	-0.00851114	0.0110489	-0.0582988	-0.00562444	-6.50774e-05	-0.00272203	-0.00586551	4.31947e-06	-4.75161e-05	-0.0118307	0.00259278	2.08113e-05	-0.00106827	8.14907e-09	0.00120156	-7.52555e-06	0.00185222	0.00059095	0.00118745	0.000265962
ACACAGTTCCATCTCG.1	-0.0268061	0.00299289	-0.0451462	-0.00478774	0.0160623	0.00315326	0.00126264	-0.0018979	-0.000302966	0.00237333	-0.00134088	-0.00421587	-0.000768504	-0.0168623	-0.0208125	-0.00970828	0.00486838	1.77659e-05	0.000137351	0.00580022	-0.00842926	0.00594513	0.00299166	-0.00518471	0.00401766	1.39792e-05	0.0446212	-0.000406606	-0.0030449	-0.0274119	0.0334326	-0.132799	-0.0250144	-0.000111888	-0.00272516	-0.0162475	5.87367e-05	-9.08552e-06	-0.0212413	0.00267953	1.14534e-05	0.0134583	1.39989e-08	0.003046	2.67248e-05	0.00180164	0.00152756	0.000446764	0.000259552
ACACGCGGTAGCGTAG.1	-0.0179779	-3.44496e-06	-0.0677451	0.000529679	0.0140741	0.00298023	0.0011427	0.0045993	-0.000295803	0.00388204	-0.00136188	-0.00540401	-0.0011667	-0.00981596	-0.011629	-0.0427593	0.00528135	1.527e-05	0.000134841	0.00180073	-0.0046104	0.00589364	0.00269128	-0.00540943	0.00403744	5.22919e-05	0.088702	-0.00038263	-0.00194397	-0.0166471	0.0182403	-0.162547	-0.00926664	-8.92817e-05	-0.00272257	-0.0105253	6.13742e-06	-2.56263e-05	-0.019232	0.00257163	1.25477e-05	0.00197898	8.44011e-09	0.00195783	1.46683e-08	0.00184904	0.000556007	0.000993042	0.00026387
ACACTGAAGCGCCTCA.1	-0.0162541	0.000390883	-0.0554313	0.000820019	0.0116566	0.00292111	0.00112281	0.00749239	-0.000288886	0.00858646	-0.00139982	-0.00595812	-0.00117375	-0.00695661	-0.00887488	-0.0402895	0.00529421	1.61789e-05	0.000134259	-0.00301353	-0.00485173	0.00589365	0.00234739	-0.00543886	0.00404171	7.28462e-05	0.0888625	-0.000368586	-0.00161264	-0.0140689	0.0149757	-0.164489	-0.0095983	-8.72794e-05	-0.00272234	-0.0101133	4.78141e-06	-3.7523e-05	-0.0131094	0.00256123	1.36271e-05	0.00209512	8.44011e-09	0.00161657	-9.77889e-09	0.00184872	0.000509173	0.00105979	0.000265718
ACAGAAAAGCATGGGT.1	-0.00353865	-0.00122636	-0.0388427	-0.000777308	0.00371895	0.00291058	0.00107404	0.00537109	-0.000248848	0.00117034	-0.00133752	-0.00362089	-0.00117617	-0.000903945	-0.00366966	-0.0292683	0.00529615	1.44504e-05	0.000133023	0.00343998	-0.00314854	0.00577241	0.00208098	-0.00558274	0.00413299	8.68458e-05	0.0291342	-0.000324329	-0.00107873	-0.00729941	0.00878367	-0.0155515	-0.00612152	-6.40472e-05	-0.002722	-0.00451022	-1.51247e-06	-4.99897e-05	-0.00562447	0.00256978	2.52314e-05	-0.00109795	8.09086e-09	0.00106924	-1.09568e-05	0.0018471	0.000501499	0.00118761	0.000265867
ACAGAAACACAATTCG.1	-0.0100905	-0.00084512	-0.00827609	-0.0107826	-0.00066109	0.0030587	0.00165982	0.0127677	-0.000274534	0.00108635	-0.00133991	-0.00343109	-0.0011758	0.000913879	-0.00407043	-0.106584	0.00529189	1.83694e-05	0.000132905	0.0335703	-0.0040224	0.00586164	0.00275067	-0.00589444	0.00405465	9.89065e-07	0.0662291	-0.000329217	-0.00169666	-0.0146931	0.0234962	-0.159399	-0.0026456	-7.24029e-05	-0.002722	-0.0160641	8.80193e-06	-2.33054e-05	-0.0364421	0.00290259	1.19638e-05	-0.00160691	-3.86499e-08	0.00169152	-4.50062e-07	0.00184641	0.000852034	0.00118659	0.000265898
ACAGCCGCATTGCCTC.1	-0.00358284	-0.00127732	-0.0464265	-0.00281636	0.00344981	0.00291513	0.00107875	0.00455081	-0.000249305	0.00117057	-0.00133513	-0.0036244	-0.00117615	0.00121536	-0.00367253	-0.0398953	0.00529643	1.45026e-05	0.000133025	0.00385585	-0.00311353	0.00577123	0.00210779	-0.0055844	0.00413423	7.44984e-05	0.0280774	-0.000324426	-0.00109091	-0.00722248	0.00898941	-0.013617	-0.00645489	-6.43664e-05	-0.002722	-0.00392842	-2.36742e-06	-5.01052e-05	-0.00537857	0.00257127	2.48812e-05	-0.00108613	8.14907e-09	0.00108149	-9.47784e-06	0.00185339	0.000457898	0.00118758	0.000265963
ACAGCCGTCTGCTGAA.1	-0.00405043	-0.0013307	-0.0355738	-0.0108916	0.00640374	0.00296358	0.00109721	0.00688578	-0.000249855	0.00116659	-0.00133659	-0.00358489	-0.00117574	0.008242	-0.00371102	-0.052358	0.00529563	1.46963e-05	0.000133006	0.00490895	-0.00314846	0.0057875	0.00215281	-0.00559843	0.00411966	4.46923e-05	0.0348496	-0.000324843	-0.00118233	-0.00820343	0.0101568	-0.0476849	-0.00577941	-6.49041e-05	-0.00272203	-0.00543639	5.22099e-06	-4.60315e-05	-0.0119807	0.00258579	2.17799e-05	-0.00109057	8.14907e-09	0.00116926	-9.08645e-06	0.00185473	0.000561908	0.00118744	0.000265954
ACAGGGAGTCACTACA.1	-0.00365555	-0.00124928	-0.0482903	-0.000604815	0.0037141	0.00290719	0.00107974	0.00466559	-0.000250057	0.00117138	-0.00133289	-0.00360107	-0.00117616	-0.00131972	-0.00366623	-0.0356715	0.00529648	1.44392e-05	0.000133011	0.0026254	-0.00313124	0.00577046	0.00208631	-0.00558919	0.00413493	8.05259e-05	0.037256	-0.000324314	-0.00109163	-0.00752352	0.00928686	-0.0050225	-0.00615844	-6.41772e-05	-0.002722	-0.00412674	-2.44007e-06	-5.0107e-05	-0.00477055	0.00257601	2.59988e-05	-0.00108408	8.14907e-09	0.00108447	-8.96025e-06	0.00184847	0.000465676	0.0011876	0.000265963
ACATCCCCAAGAGTAT.1	-0.00335747	-0.00122682	-0.0426437	-0.00108199	0.00179622	0.00290697	0.00107456	0.00560211	-0.000248767	0.00117277	-0.00133335	-0.00362099	-0.00117617	-0.000138249	-0.00367759	-0.0226843	0.00529671	1.451e-05	0.000133052	0.00305986	-0.00313737	0.00576898	0.00208533	-0.00557259	0.00413601	0.0001033	0.0175819	-0.000324344	-0.00105013	-0.00684533	0.00746381	0.00531048	-0.00653762	-6.3939e-05	-0.00272201	-0.00349794	-3.85568e-06	-4.90639e-05	-0.00253442	0.00255965	2.74815e-05	-0.00108439	8.14907e-09	0.0010455	-1.31249e-05	0.0018542	0.000448853	0.00118759	0.000265956
ACATCCCTCAAAGCCT.1	-0.00471516	-0.0014142	-0.0284763	-0.0119272	0.00670555	0.00304933	0.0011238	0.00747323	-0.000250639	0.00116323	-0.00133044	-0.00356213	-0.00117597	0.00900096	-0.00372686	-0.0692858	0.00529565	1.46143e-05	0.000133015	0.00552339	-0.00318553	0.0057974	0.00221756	-0.00559755	0.0041095	2.95881e-05	0.036058	-0.000325283	-0.00122818	-0.0084272	0.0109831	-0.0513308	-0.00585827	-6.51038e-05	-0.002722	-0.00585499	4.57093e-06	-4.16338e-05	-0.0140435	0.00258652	2.03978e-05	-0.00110272	8.14907e-09	0.00121562	-9.02824e-06	0.00185624	0.000583693	0.00118728	0.000265954
ACATCCCTCTTGCAGA.1	-0.0344608	0.00179841	0.0300134	-0.00713486	0.0073421	0.00452769	0.0013888	0.00109444	-0.000434587	0.00145651	-0.000949418	-0.003823	-0.000948557	-0.0234904	-0.0113214	0.00508242	0.00495183	3.61912e-05	0.000135051	-0.00222792	-0.00938346	0.00623002	0.0054317	-0.00488839	0.00380921	-3.12701e-05	0.00707063	-0.000404386	-0.00404654	-0.0351067	0.0539494	0.0293821	-0.0234818	-0.000161231	-0.00272191	-0.0346334	1.48695e-05	3.88594e-07	-0.012426	0.00272526	2.62633e-06	0.0120292	8.42847e-08	0.00368014	0.000112914	0.00174302	0.00289011	0.000881485	0.000235789
ACATCGACAAGCTACT.1	-0.00422855	-0.00124889	-0.0373695	-0.00484452	0.00598688	0.00290667	0.0010854	0.00393179	-0.000252265	0.00116301	-0.00134202	-0.00368451	-0.00117614	0.00143518	-0.00370067	-0.050941	0.00529579	1.46851e-05	0.000132969	0.00551709	-0.00315337	0.00578221	0.00214995	-0.00560035	0.00412439	5.67287e-05	0.0580854	-0.000324821	-0.00127022	-0.00907241	0.0116833	-0.0599056	-0.00506756	-6.49421e-05	-0.00272207	-0.00509334	-2.06754e-07	-4.63352e-05	-0.00929639	0.00258899	2.07592e-05	-0.00106699	8.03266e-09	0.00125321	-5.38747e-06	0.00184404	0.000466347	0.00118743	0.000265963
ACATGCAAGGTCGTAG.1	-0.0034157	-0.00123591	-0.0378009	-0.000173988	0.00275718	0.00291305	0.00107555	0.00560116	-0.000248561	0.00117217	-0.00133666	-0.00361614	-0.00117617	-0.00114345	-0.00366881	-0.0241399	0.00529673	1.4443e-05	0.000133032	0.00279867	-0.00313747	0.00576716	0.0020813	-0.0055773	0.00413781	0.00010673	0.0216133	-0.00032427	-0.00106154	-0.00693752	0.00770147	0.00424612	-0.00648707	-6.38972e-05	-0.002722	-0.00400546	-3.79421e-06	-4.84567e-05	-0.00346717	0.00256415	2.70158e-05	-0.00109014	8.14907e-09	0.00105673	-1.29277e-05	0.00185193	0.000463903	0.00118761	0.000265956
ACCAAACTCGGACCAC.1	-0.00393591	-0.00127901	-0.056093	-0.0072518	0.00245457	0.00291048	0.00108353	0.00408404	-0.000252451	0.00116762	-0.00134159	-0.00362754	-0.00117615	0.00476702	-0.0036921	-0.0513388	0.00529609	1.49012e-05	0.000132985	0.00640628	-0.00313638	0.00577759	0.00215975	-0.0055961	0.00412843	6.20727e-05	0.0419838	-0.000324471	-0.00118276	-0.00809707	0.0103017	-0.0387053	-0.00596502	-6.4604e-05	-0.00272201	-0.00463796	-1.06171e-07	-4.83114e-05	-0.00724673	0.00258256	2.30297e-05	-0.00107836	8.09086e-09	0.00116883	-6.8699e-06	0.00185221	0.000468433	0.00118747	0.000265963
ACCAACAAGGAACGCT.1	-0.00606956	-0.000842601	-0.0964881	0.000655031	0.0056863	0.00290776	0.00109789	0.00643814	-0.000268825	0.00120672	-0.00134714	-0.00399647	-0.0011584	-0.00524693	-0.00417215	-0.0328953	0.0052777	1.451e-05	0.000133555	0.000678708	-0.00356455	0.0058081	0.00208912	-0.00554439	0.00410284	0.000105493	0.0793548	-0.000336101	-0.00147399	-0.0105626	0.00926437	-0.0456631	-0.0100704	-6.88892e-05	-0.00272206	-0.00796327	3.93949e-06	-4.36567e-05	-0.00568372	0.00256471	2.23182e-05	-0.000771202	8.14907e-09	0.00147503	-2.2999e-06	0.0018525	0.00045909	0.00116492	0.00026547
ACCATTTAGCAATAAC.1	-0.00353999	-0.00127137	-0.0520771	-0.00236671	0.000693392	0.002915	0.00107511	0.00425557	-0.000257607	0.00117125	-0.00133129	-0.00369413	-0.0011761	8.03787e-05	-0.00367767	-0.0396568	0.00529628	1.44839e-05	0.000132976	0.00487342	-0.00312959	0.00577978	0.00207995	-0.00559485	0.00412598	8.21538e-05	0.0364254	-0.000324449	-0.00116153	-0.00797354	0.00932422	-0.00928611	-0.00678129	-6.44178e-05	-0.00272195	-0.00369433	-2.35625e-06	-4.70057e-05	-0.00309289	0.00258221	2.59727e-05	-0.00106497	8.14907e-09	0.00115279	-7.74581e-06	0.00184492	0.000449151	0.00118737	0.000265962
ACCCAAAGTGGAGGTT.1	-0.00879741	-0.000569127	-0.0958842	8.02181e-05	0.00847117	0.00291414	0.00111278	0.00615641	-0.000279731	0.00172141	-0.0013471	-0.00426657	-0.00117233	-0.0061795	-0.00496452	-0.02767	0.00528888	1.46516e-05	0.000134105	-0.000748513	-0.00387872	0.00583645	0.00211138	-0.00551116	0.00407913	9.18862e-05	0.0909799	-0.000346696	-0.00156994	-0.0123364	0.0117438	-0.0828448	-0.00835066	-7.39905e-05	-0.00272209	-0.00832185	5.96745e-06	-4.01009e-05	-0.00741515	0.00256301	1.84141e-05	-9.79714e-05	8.17818e-09	0.00156996	-1.13179e-06	0.00185157	0.000452697	0.00113665	0.000264792
ACCCTCAAGAAGTCTA.1	-0.00332449	-0.00125892	-0.0414581	-0.000712743	-0.00081289	0.00290614	0.00107143	0.00522175	-0.00025051	0.00117322	-0.00132771	-0.00363702	-0.00117616	-0.000619991	-0.00367297	-0.0341885	0.00529651	1.48937e-05	0.000132989	0.0032152	-0.0031026	0.00574099	0.00209345	-0.0055742	0.00413589	0.000119762	0.0184849	-0.000324426	-0.00109431	-0.00697019	0.00767232	0.00645852	-0.00722432	-6.46621e-05	-0.00269172	-0.00271691	-3.62098e-06	-5.00046e-05	0.000549763	0.00256264	2.75038e-05	-0.00104538	8.14907e-09	0.00109038	-1.15419e-05	0.00184362	0.000413209	0.00118772	0.000265962
ACCCTCAAGTCGGCCT.1	-0.00350887	-0.00126049	-0.0544796	-0.000572236	0.000274202	0.00291804	0.00107019	0.00424844	-0.000258313	0.00117177	-0.00132495	-0.00373578	-0.00117603	-0.00175905	-0.00368737	-0.0314229	0.00529647	1.5039e-05	0.000132963	0.00359012	-0.00311086	0.00578127	0.00208333	-0.00558667	0.00412663	0.000114182	0.0444347	-0.000324866	-0.00119505	-0.00806228	0.0088753	-9.23276e-05	-0.00714747	-6.53203e-05	-0.00272165	-0.00329444	-3.31737e-06	-4.66686e-05	-0.000486225	0.00257653	2.639e-05	-0.00101236	8.14907e-09	0.00118974	-7.60029e-06	0.00183959	0.000421092	0.0011875	0.000265954
ACCCTCAGTGTTCCAA.1	-0.00422947	-0.00133678	-0.0353288	-0.011092	0.00664857	0.00299331	0.00110109	0.0060722	-0.000250779	0.00116353	-0.00133373	-0.00360371	-0.00117613	0.00808524	-0.00371652	-0.0564847	0.00529619	1.48192e-05	0.000132987	0.00585704	-0.00318858	0.00579473	0.00216726	-0.00559551	0.00411381	4.07361e-05	0.0400541	-0.000325186	-0.00121464	-0.00856848	0.0118726	-0.0534078	-0.00574629	-6.51544e-05	-0.002722	-0.00551814	3.62471e-06	-4.75124e-05	-0.0137515	0.00258298	2.04984e-05	-0.00109703	8.11997e-09	0.00119968	-7.86083e-06	0.00185481	0.00058727	0.00118748	0.000265945
ACCCTCATCTGCGGCA.1	-0.0253647	0.00284185	-0.0136623	-0.00468231	0.0223264	0.00361947	0.00126851	0.00147988	-0.000308638	0.00177059	-0.00103061	-0.00418007	-0.000896156	-0.0203826	-0.00824025	-0.00715381	0.00495508	3.29539e-05	0.00013536	-0.0113183	-0.00895587	0.0059692	0.00316458	-0.00526723	0.00400039	1.36038e-05	0.0453256	-0.000396116	-0.00329421	-0.0305627	0.0418014	-0.0647353	-0.0194838	-0.000137799	-0.00272202	-0.0303494	1.18744e-05	-1.26681e-05	-0.0138424	0.00270863	1.16862e-05	0.00962115	1.93249e-08	0.00318576	5.69322e-05	0.00177164	0.0023565	0.00091844	0.000248579
ACCCTTGAGTCAGAGC.1	-0.00347784	-0.00126414	-0.0403359	-0.000653189	0.00319993	0.00291587	0.00107394	0.00525435	-0.000249091	0.00117183	-0.00133424	-0.00363901	-0.00117617	-0.000792291	-0.00366997	-0.0292386	0.00529665	1.44504e-05	0.000133019	0.00261064	-0.00311238	0.00576929	0.00209243	-0.00558327	0.00413596	9.63062e-05	0.028213	-0.000324396	-0.00108009	-0.00708614	0.00819819	-0.000377476	-0.00657167	-6.41795e-05	-0.002722	-0.00386015	-3.52226e-06	-5.05634e-05	-0.00386888	0.0025702	2.62894e-05	-0.00109412	8.14907e-09	0.00107228	-1.06662e-05	0.00185131	0.000461072	0.00118761	0.000265963
ACCCTTGCATTCGGGC.1	-0.00755665	-0.00146631	-0.0892595	-0.0348123	0.0152567	0.00304928	0.00115041	0.00137895	-0.000280955	0.00111941	-0.00133377	-0.00349522	-0.00117589	0.0255589	-0.0038974	-0.0947286	0.00529149	1.8239e-05	0.000132969	0.022242	-0.00349174	0.00585662	0.00222599	-0.00583407	0.00405918	3.15561e-06	0.0400484	-0.000331273	-0.00207554	-0.0146731	0.0235021	-0.139986	-0.00676047	-7.0927e-05	-0.00272221	-0.00805747	8.17701e-06	-2.64589e-05	-0.0383467	0.00282356	1.3357e-05	-0.000543248	6.40284e-09	0.0020649	8.3819e-09	0.00185394	0.000687614	0.00118578	0.000265962
ACCTACCGTGGTCTTA.1	-0.00338143	-0.00126447	-0.0355914	0.000109116	-0.000940139	0.00290373	0.00107879	0.00574304	-0.000248432	0.00118219	-0.00133197	-0.00363743	-0.00117566	-0.000862133	-0.0036761	-0.0217649	0.00529631	1.44653e-05	0.000133108	0.00260292	-0.00310567	0.00576703	0.00207952	-0.00556216	0.00413821	0.000128914	0.00539017	-0.000324441	-0.00102783	-0.0063959	0.00701687	0.0170457	-0.00708338	-6.39581e-05	-0.002722	-0.00279187	-3.20934e-06	-5.14537e-05	0.00161597	0.00255539	2.86475e-05	-0.00107804	8.14907e-09	0.00102969	-1.40711e-05	0.00185736	0.000411972	0.00118729	0.000265963
ACCTGAAAGATAACGT.1	-0.00371863	-0.00127393	-0.0485974	-0.00248412	0.00358983	0.00291427	0.00108713	0.00407999	-0.00025156	0.00117091	-0.00133285	-0.00360286	-0.00117597	0.000638571	-0.003671	-0.0515284	0.00529615	1.4443e-05	0.00013301	0.00335368	-0.00312688	0.00577252	0.00209046	-0.00559917	0.0041326	7.12201e-05	0.0326601	-0.000324374	-0.00110434	-0.00744021	0.0094269	-0.00932285	-0.00669819	-6.42607e-05	-0.002722	-0.00371227	-3.0417e-06	-4.95855e-05	-0.00494981	0.00258587	2.52798e-05	-0.00107473	8.14907e-09	0.00109457	-7.26688e-06	0.00184978	0.000459269	0.00118759	0.000265963
ACCTGAACAAACTCGT.1	-0.00400981	-0.0012606	-0.032164	-0.0119854	0.00395471	0.0029236	0.00109149	0.00611669	-0.000250826	0.00116435	-0.00134558	-0.00361602	-0.00117615	0.00898718	-0.00372879	-0.0486975	0.005296	1.52476e-05	0.000132978	0.00644308	-0.00316164	0.0057842	0.00211836	-0.00561069	0.00412267	4.96581e-05	0.0434585	-0.000324903	-0.00120244	-0.00859017	0.011258	-0.057209	-0.00539956	-6.48922e-05	-0.00272216	-0.00548312	4.47035e-06	-4.81494e-05	-0.0100587	0.00259753	2.08691e-05	-0.00106259	8.11997e-09	0.00118734	-7.27619e-06	0.00184875	0.000544354	0.00118749	0.000265963
ACCTGAACAGACAAAT.1	-0.00384682	-0.00127952	-0.0529967	-0.00492254	0.00655635	0.00290754	0.00108761	0.00227161	-0.000253615	0.00116704	-0.00133558	-0.00369558	-0.00117605	0.00191909	-0.00368309	-0.0666228	0.00529548	1.53072e-05	0.000132928	0.00445825	-0.00314152	0.00578192	0.0020801	-0.00562263	0.00412372	6.27432e-05	0.0486626	-0.000324575	-0.0012534	-0.00868319	0.0118012	-0.0391983	-0.00657312	-6.455e-05	-0.002722	-0.00397876	-2.31713e-06	-4.43663e-05	-0.00932932	0.00261019	2.30819e-05	-0.00102936	8.11997e-09	0.0012393	-2.55438e-06	0.0018509	0.000445157	0.00118744	0.000265963
ACCTGTCGTCCGGTCA.1	-0.0124879	-0.00119726	-0.0761942	-0.00671368	0.0135212	0.00310404	0.00112021	0.00336194	-0.00029426	0.00115208	-0.00130034	-0.00463916	-0.0011458	-0.00507451	-0.00494759	-0.0547643	0.00526204	2.51941e-05	0.000133717	0.00811302	-0.00371686	0.00588775	0.00239509	-0.00560144	0.00403624	1.33719e-05	0.0662497	-0.000344103	-0.00210484	-0.0184077	0.0229041	-0.110971	-0.00980902	-7.89089e-05	-0.00272248	-0.011568	6.76606e-06	-2.19811e-05	-0.0205644	0.0026263	1.29156e-05	0.00228563	9.54606e-09	0.00209244	6.44941e-08	0.00183576	0.000704959	0.00115688	0.000265336
ACGATCAAGACGACTG.1	-0.00588713	-0.00135184	-0.0524628	-0.0176973	0.0194171	0.00296036	0.00110735	0.00305167	-0.000259762	0.00115857	-0.00134648	-0.00360031	-0.00117164	0.0126085	-0.00372309	-0.0862035	0.00529071	1.44541e-05	0.000132978	0.0101016	-0.00320505	0.00580279	0.00211583	-0.00572824	0.00410322	2.79685e-05	0.0496993	-0.000324598	-0.00151325	-0.0106374	0.0150218	-0.0726154	-0.00793537	-6.49221e-05	-0.002722	-0.00712708	-1.82912e-06	-4.10024e-05	-0.0298113	0.00271559	1.87773e-05	-0.00123982	7.68341e-09	0.00149166	-7.44127e-07	0.00185003	0.000676021	0.00118699	0.000265962
ACGATCACATTGAGGG.1	-0.00382533	-0.00131088	-0.0453846	-0.0038971	0.00603277	0.00293974	0.00108925	0.00402107	-0.000253088	0.00116843	-0.00132544	-0.00362627	-0.00117613	0.00124475	-0.00368037	-0.0598123	0.00529628	1.44616e-05	0.000132991	0.005581	-0.00314268	0.00578568	0.00209019	-0.00560695	0.00412175	6.26799e-05	0.0387656	-0.000324612	-0.00121726	-0.00825993	0.0109946	-0.0374552	-0.00622483	-6.48443e-05	-0.002722	-0.00437805	-8.73581e-07	-4.70392e-05	-0.0101363	0.00259382	2.31601e-05	-0.00112234	8.09086e-09	0.00120491	-5.87921e-06	0.00185212	0.000513628	0.00118752	0.000265934
ACGATCATCGTCGGGT.1	-0.0046606	-0.0013157	-0.0822324	-0.00564302	0.00840987	0.00298312	0.00106975	0.00353187	-0.000270053	0.00116283	-0.00125638	-0.00379515	-0.00117593	0.000129119	-0.00375833	-0.0702911	0.00529466	1.6015e-05	0.000133228	0.00533914	-0.00319897	0.00581085	0.00213734	-0.00562671	0.00409696	5.4894e-05	0.0584735	-0.000325119	-0.00158004	-0.0113236	0.0118758	-0.0375947	-0.00630857	-6.61796e-05	-0.00272143	-0.00565687	-1.08965e-06	-3.42838e-05	-0.00781879	0.00262743	2.06418e-05	-0.000971172	8.14907e-09	0.00156915	-7.79517e-07	0.00185113	0.000473812	0.00118627	0.000265945
ACGGGTCTCATTGCGA.1	-0.0130593	-0.000103028	-0.0916282	0.000140607	0.0159807	0.00297674	0.00113949	0.00488222	-0.000292433	0.00157229	-0.00142913	-0.00458824	-0.00113405	-0.0100069	-0.00622467	-0.0358813	0.00525014	1.63838e-05	0.000134351	-0.00045835	-0.00455475	0.00587614	0.00227361	-0.00550383	0.00404562	5.21857e-05	0.0910753	-0.000356277	-0.00191226	-0.0164096	0.0167081	-0.137174	-0.0110476	-8.13858e-05	-0.00272242	-0.0100617	3.62471e-06	-2.88505e-05	-0.0163795	0.00258718	1.4361e-05	0.00254988	8.84756e-09	0.00191158	1.16997e-08	0.00182876	0.000666633	0.00106008	0.000264432
ACGGGTCTCCAGCACG.1	-0.00387005	-0.00129071	-0.0476482	-0.00463014	0.00655953	0.00291615	0.00109902	0.00295462	-0.000254563	0.0011676	-0.00134011	-0.00361063	-0.00117566	0.00178115	-0.00368936	-0.0816914	0.00529551	1.45882e-05	0.000133	0.00614456	-0.00316146	0.00578022	0.00208267	-0.00564666	0.00412649	6.05881e-05	0.0358292	-0.000324531	-0.0012318	-0.00843241	0.0113662	-0.0344565	-0.0072226	-6.49686e-05	-0.00272204	-0.00419474	-2.92063e-06	-4.42602e-05	-0.0112291	0.00263377	2.29105e-05	-0.00114416	7.97445e-09	0.00121723	-3.77442e-06	0.00185376	0.000475124	0.00118753	0.000265963
ACGGGTCTCGGCTCTT.1	-0.0144784	-0.000138125	-0.0822808	0.000293029	0.0158415	0.00296408	0.00113311	0.004397	-0.000292501	0.00203259	-0.00139182	-0.00509665	-0.00114393	-0.00963746	-0.00699495	-0.0369453	0.00526058	1.6097e-05	0.000134682	-0.000327678	-0.00447459	0.00587948	0.00224853	-0.00547306	0.00404377	5.82766e-05	0.090525	-0.000360651	-0.00192128	-0.0164033	0.0168129	-0.136458	-0.0108335	-8.31145e-05	-0.00272274	-0.00950625	3.8892e-06	-2.83867e-05	-0.0158829	0.00257267	1.40667e-05	0.00246524	8.64384e-09	0.00192121	1.30385e-08	0.00184094	0.000576854	0.0010455	0.000264628
ACGGTCGCAGCGAACA.1	-0.0143371	0.000795653	-0.0728836	-0.00180738	0.0239908	0.00308238	0.00119854	0.000881518	-0.000297388	0.00144387	-0.00139063	-0.00413467	-0.00111601	-0.014018	-0.00526023	-0.0232962	0.00520097	2.89157e-05	0.000133777	-0.0041264	-0.0058125	0.00591172	0.00237381	-0.00546291	0.00403303	2.49222e-05	0.101733	-0.000353677	-0.00224832	-0.0218113	0.026807	-0.128374	-0.0131968	-9.40294e-05	-0.00272239	-0.0236078	6.34789e-06	-2.12416e-05	-0.0248555	0.00260668	1.29892e-05	0.00361608	1.25729e-08	0.00225545	3.20352e-06	0.00182265	0.00155935	0.00109639	0.00025565
ACGGTCGTCCCTCGAT.1	-0.00331968	-0.00126797	-0.0300712	-0.000103516	-0.000826588	0.00290575	0.00107765	0.00586058	-0.00024801	0.00117432	-0.00133161	-0.00358666	-0.00117604	-0.000616167	-0.0036677	-0.0259082	0.00529663	1.45808e-05	0.000133125	0.00296597	-0.00311271	0.00576649	0.00208143	-0.00556968	0.00413895	0.000123227	0.000183288	-0.000324314	-0.00103441	-0.00630936	0.00694303	0.0191117	-0.00709807	-6.4095e-05	-0.002722	-0.00280644	-3.83705e-06	-5.15189e-05	0.00150254	0.00255716	2.84053e-05	-0.00108116	8.14907e-09	0.00103244	-1.39258e-05	0.00185727	0.000414461	0.00118952	0.000265962
ACGTAACAGTTAACGA.1	-0.021634	0.00362254	-0.0416288	-0.00255448	0.0230655	0.00314532	0.00125197	0.0037691	-0.000298167	0.00205714	-0.00115371	-0.00438057	-0.000745907	-0.0176285	-0.0073227	-0.022176	0.00481991	2.61534e-05	0.000135278	-0.0123063	-0.00888788	0.00593346	0.00268043	-0.00531974	0.00402598	1.92989e-05	0.0654241	-0.000389224	-0.00283414	-0.026192	0.0332512	-0.119593	-0.0179728	-0.00011586	-0.00272199	-0.0263177	1.27777e-05	-1.8226e-05	-0.00701758	0.00268695	1.20539e-05	0.00733918	1.29221e-08	0.00285512	2.6633e-05	0.00176914	0.0022357	0.000932753	0.000251291
ACGTACATCACTGTTT.1	-0.0216693	-0.0028551	-0.0220757	-0.0505938	-0.0132671	0.0049911	0.00191862	0.0176836	-0.000299662	0.000846043	-0.000964447	-0.00314614	-0.0011719	0.0250839	-0.00455356	-0.0544816	0.00526299	2.41883e-05	0.000133133	0.0652836	-0.00459329	0.00594422	0.00717118	-0.00644886	0.00399624	-0.000562117	-0.000909627	-0.000346838	-0.00420917	-0.0294683	0.0537315	-0.182079	-0.00477069	-0.000102363	-0.00272435	-0.0464194	3.09425e-05	7.57165e-06	-0.0669913	0.00354994	-4.06019e-05	-0.00262479	-4.39351e-07	0.00382357	1.10662e-05	0.00183986	0.00443366	0.00118508	0.000265108
ACGTAGTAGGTAAGGA.1	-0.0141445	0.000190665	-0.0976919	-0.000198259	0.0168532	0.00297221	0.00117139	0.00159946	-0.000295365	0.00141586	-0.00139309	-0.00426112	-0.00114441	-0.0130883	-0.00524129	-0.0470219	0.00526237	1.48006e-05	0.00013463	0.00286916	-0.00491199	0.00587576	0.00213315	-0.00553143	0.00404514	4.82202e-05	0.100967	-0.000380022	-0.00216183	-0.0194869	0.01781	-0.121104	-0.0123773	-8.5818e-05	-0.00272213	-0.0106587	2.68966e-06	-1.97869e-05	-0.0199566	0.00259772	1.35433e-05	0.00102425	8.64384e-09	0.00218066	1.5134e-07	0.00184721	0.000530869	0.000981331	0.00026463
ACGTAGTTCGGTCTGG.1	-0.00613073	-0.00143956	-0.10056	-0.00441003	0.0118278	0.00309689	0.00109207	0.00112785	-0.000288624	0.00114745	-0.00114102	-0.00394732	-0.00117293	-0.00446586	-0.00411482	-0.0369665	0.00528958	3.0918e-05	0.000133151	0.00258298	-0.0033169	0.00586966	0.00231645	-0.00555301	0.00406277	4.65084e-05	0.0864155	-0.000327436	-0.00193232	-0.0148461	0.0171782	-0.0627562	-0.01013	-7.46696e-05	-0.00272246	-0.00872821	4.23193e-06	-3.26801e-05	-0.00794858	0.00258608	1.75573e-05	0.00158262	1.11759e-08	0.00192944	-5.93718e-08	0.00184118	0.000542775	0.00117858	0.000264727
ACGTTCCGTCGATGCC.1	-0.0041417	-0.00115323	-0.0656175	0.000585214	0.00110273	0.00291372	0.00108349	0.00525635	-0.000257176	0.00119311	-0.00132908	-0.00372152	-0.00117279	-0.00212965	-0.00380244	-0.0402121	0.0052921	1.4443e-05	0.000133954	0.00257557	-0.00323347	0.0057875	0.00211392	-0.00556509	0.00412164	0.000121357	0.0271608	-0.000326125	-0.00116354	-0.00725966	0.00773701	0.0160874	-0.00719742	-6.53607e-05	-0.00272169	-0.00403205	-1.35973e-06	-5.04721e-05	0.000503033	0.00255936	2.65203e-05	-0.00092857	8.14907e-09	0.00116494	-9.31928e-06	0.00185506	0.000431255	0.00118275	0.000265516
ACGTTCCGTGGTCTGC.1	-0.00639119	-0.00134567	-0.0756187	-0.022747	0.0182104	0.00295381	0.00109698	0.00414198	-0.000263219	0.00115272	-0.00133671	-0.00358185	-0.00117437	0.01725	-0.00375535	-0.088584	0.00529329	1.44579e-05	0.000133179	0.00916102	-0.00324625	0.00581662	0.00215116	-0.00583784	0.00409518	1.74949e-05	0.0477827	-0.000325819	-0.00153829	-0.0110273	0.0147927	-0.102344	-0.00748948	-6.66321e-05	-0.00272201	-0.00578612	-1.60187e-06	-3.7197e-05	-0.0276454	0.00282533	1.81869e-05	-0.000870362	8.09086e-09	0.00151583	-2.89409e-07	0.0018471	0.000604346	0.00118714	0.000265939
ACTACGAAGAGTGGCT.1	-0.0036812	-0.00124296	-0.0464265	-0.000700809	0.00409625	0.00290518	0.00108251	0.00488421	-0.000249866	0.00117093	-0.00133008	-0.00358807	-0.00117614	-0.00135982	-0.0036655	-0.0374436	0.00529644	1.44392e-05	0.000133017	0.00264002	-0.00313635	0.0057712	0.00208472	-0.00558743	0.00413438	7.66497e-05	0.0374925	-0.000324292	-0.00110004	-0.00764449	0.00945324	-0.00924271	-0.0058485	-6.41946e-05	-0.002722	-0.0043328	-1.22748e-06	-4.94961e-05	-0.00536573	0.00257427	2.55741e-05	-0.00109284	8.14907e-09	0.00109314	-9.10554e-06	0.00184762	0.000475168	0.00118759	0.000265963
ACTACGATCTGTGTGA.1	-0.00963408	4.01684e-05	-0.0900784	0.00084204	0.012856	0.00292724	0.00111147	0.00660415	-0.000283446	0.00172902	-0.0013752	-0.00456422	-0.00116775	-0.00802553	-0.00515055	-0.0327404	0.00528714	1.5296e-05	0.000133898	-0.00219668	-0.00451355	0.00584951	0.00215529	-0.00550663	0.00407127	8.2219e-05	0.0997799	-0.000345049	-0.00170219	-0.013718	0.0124734	-0.0964527	-0.00840064	-7.72221e-05	-0.00272203	-0.00867268	2.79937e-05	-3.98681e-05	-0.0117211	0.00256574	1.70507e-05	0.000213251	8.41101e-09	0.00170307	-3.53204e-07	0.00184438	0.000473037	0.00112124	0.000265649
ACTATCTCAAGCAGGT.1	-0.01286	-0.000347949	-0.0909578	0.000122439	0.0176266	0.00293156	0.0011209	0.00543051	-0.000290588	0.00156262	-0.00136522	-0.00442109	-0.00115663	-0.00949698	-0.00512284	-0.0298428	0.00527664	1.45659e-05	0.00013423	-0.00215373	-0.00419924	0.00586614	0.00212148	-0.00549604	0.00405268	5.87348e-05	0.106107	-0.000356896	-0.00189997	-0.0157617	0.0157343	-0.133699	-0.0105998	-8.04491e-05	-0.00272198	-0.00977644	5.87013e-06	-2.82768e-05	-0.0175624	0.0025717	1.46888e-05	0.00133507	8.17818e-09	0.001904	1.11759e-08	0.00184786	0.000510097	0.00107438	0.000265552
ACTATCTCACTGAATC.1	-0.00695925	-0.00145349	-0.071843	-0.0235346	0.021265	0.00305605	0.00109475	0.00413615	-0.000266923	0.00114667	-0.0013598	-0.00358003	-0.00117324	0.0175166	-0.00375912	-0.0957243	0.0052915	1.45286e-05	0.000133067	0.0110392	-0.00325067	0.00582846	0.0021867	-0.00588806	0.00408328	1.30377e-05	0.0411267	-0.000326661	-0.00161546	-0.0115475	0.0160753	-0.111933	-0.00846384	-6.7526e-05	-0.002722	-0.00662151	5.34579e-07	-3.66308e-05	-0.0339449	0.00287554	1.67992e-05	-0.0010743	8.03266e-09	0.00159419	-1.19442e-07	0.00184615	0.000733122	0.00118732	0.000265947
ACTATCTTCAACTACG.1	-0.00415479	-0.00142594	-0.0468477	-0.00877761	0.00808963	0.00306843	0.00111681	0.00453558	-0.000251206	0.00116557	-0.00129899	-0.00359318	-0.00117609	0.00583674	-0.00368625	-0.0603599	0.00529642	1.45547e-05	0.000132985	0.005799	-0.00319647	0.0058006	0.00215855	-0.00560054	0.0041075	4.12464e-05	0.0391128	-0.000325104	-0.00119588	-0.00846973	0.0126484	-0.043793	-0.0059105	-6.51568e-05	-0.002722	-0.0045622	5.17815e-07	-4.86877e-05	-0.0150797	0.00258756	2.08542e-05	-0.00113136	8.09086e-09	0.0011804	-7.1323e-06	0.00185151	0.00056015	0.00118746	0.000265818
ACTATGGAGTGCCTCG.1	-0.0118941	-8.85949e-05	-0.0759541	0.00108599	0.0114988	0.00293283	0.00110911	0.00598807	-0.000283197	0.00467933	-0.00135009	-0.00516088	-0.00117378	-0.00722373	-0.00703021	-0.0363653	0.00529376	1.49049e-05	0.000134373	-0.00171669	-0.00438014	0.00586626	0.00225232	-0.00546059	0.00405697	8.41022e-05	0.0888028	-0.000347948	-0.0015979	-0.0132718	0.0135711	-0.131129	-0.00918253	-7.8729e-05	-0.00272216	-0.00903785	5.89388e-06	-3.99128e-05	-0.0119065	0.00256198	1.54488e-05	0.00116804	8.41101e-09	0.00159869	-3.99072e-07	0.00184958	0.000458196	0.00110151	0.000265596
ACTATGGTCGCACGGT.1	-0.00372053	-0.00133027	-0.0526989	-0.00227569	0.00139626	0.00298715	0.00106503	0.0049512	-0.000257511	0.0011715	-0.00131057	-0.00370421	-0.00117589	0.000278538	-0.00373872	-0.0524035	0.00529638	1.44541e-05	0.000133337	0.00337449	-0.00314002	0.00578287	0.00210245	-0.00556736	0.00412416	0.000104558	0.0271205	-0.000324322	-0.00120481	-0.00770186	0.00821007	-0.000388742	-0.00728231	-6.44847e-05	-0.00272195	-0.0037978	1.38581e-06	-4.88143e-05	-0.00226676	0.00255953	2.54996e-05	-0.00105309	8.14907e-09	0.00120297	-8.46293e-06	0.00185531	0.000421509	0.00118695	0.000265956
ACTCCCAGTCATGCAT.1	-0.00394825	-0.00128126	-0.046729	-0.00533538	0.00551674	0.00291099	0.0010907	0.00282589	-0.000252927	0.00116734	-0.00133818	-0.00363587	-0.00117612	0.00266024	-0.00368247	-0.069502	0.00529588	1.46329e-05	0.00013298	0.0056317	-0.00314444	0.00578098	0.00209044	-0.00562945	0.00412527	5.94147e-05	0.0412284	-0.000324486	-0.00121515	-0.00829165	0.0113166	-0.036794	-0.00683754	-6.46992e-05	-0.002722	-0.00426897	-2.38046e-06	-4.55789e-05	-0.00944895	0.00261639	2.27913e-05	-0.00109019	7.97445e-09	0.00120087	-3.98094e-06	0.00185081	0.000470802	0.00118751	0.000265963
ACTCCCATCTTCACAT.1	-0.0068363	-0.00166953	-0.0546829	-0.0222395	0.0171918	0.00314727	0.00127568	0.000873441	-0.000276809	0.00112874	-0.00136407	-0.00344431	-0.00117601	0.0143064	-0.00382008	-0.130718	0.00529181	1.60933e-05	0.000132957	0.026347	-0.00351377	0.00584777	0.00237353	-0.00584966	0.00406656	2.82377e-06	0.0315619	-0.000328137	-0.00220355	-0.0131814	0.0234497	-0.115126	-0.00710227	-7.01897e-05	-0.00272261	-0.00711662	5.51902e-06	-2.78056e-05	-0.0466529	0.00284222	1.27843e-05	-0.00170263	4.65661e-09	0.00219472	-2.16998e-07	0.00196494	0.000648946	0.00118896	0.000265922
ACTGATGCATGTGCTA.1	-0.013589	0.00143058	-0.0749406	-0.00330919	0.0303926	0.00311605	0.00129127	-0.000328975	-0.000297419	0.00134065	-0.00134114	-0.00385053	-0.00109563	-0.0149796	-0.00514986	-0.0261393	0.00516937	2.88524e-05	0.000133842	-0.0107076	-0.00659195	0.00593423	0.00221237	-0.00546443	0.00403305	2.14856e-05	0.102185	-0.000371886	-0.00241532	-0.0238719	0.0329222	-0.127958	-0.0138839	-0.000106717	-0.00272231	-0.0249391	6.43241e-06	-1.91182e-05	-0.0279588	0.00264227	1.28066e-05	0.00600702	1.21072e-08	0.00240839	9.36515e-06	0.00177708	0.00167349	0.00113145	0.000252683
ACTGATGGTTTACGTG.1	-0.003607	-0.00125126	-0.0671807	-0.000470218	0.00116445	0.00292178	0.00107599	0.00444645	-0.000259876	0.00117153	-0.00131639	-0.00376464	-0.00117573	-0.00210941	-0.00370221	-0.0341559	0.00529621	1.60784e-05	0.000132965	0.00345996	-0.00312225	0.00578428	0.00209452	-0.00558497	0.00412405	0.000112131	0.0478136	-0.000324896	-0.00121799	-0.00833756	0.00875458	-0.00383675	-0.00698332	-6.55784e-05	-0.00272155	-0.00351623	-2.4084e-06	-4.51989e-05	-0.00103882	0.00257611	2.60733e-05	-0.000922766	8.14907e-09	0.00121421	-7.32089e-06	0.00183139	0.000421181	0.00118744	0.000265958
ACTGCAACACATCCCT.1	-0.00360418	-0.00129811	-0.0443053	-0.00452483	0.0060083	0.00293902	0.0010848	0.00602325	-0.000249089	0.00116974	-0.00132463	-0.0035795	-0.0011758	0.00229924	-0.00368005	-0.0430379	0.00529531	1.45324e-05	0.000132998	0.00347144	-0.00312791	0.00578285	0.00209461	-0.00559448	0.00412469	7.02757e-05	0.0334159	-0.000324657	-0.0011219	-0.00779142	0.00977702	-0.0311841	-0.0059436	-6.44728e-05	-0.00272203	-0.0045667	5.7118e-06	-4.72907e-05	-0.00904721	0.00258129	2.36668e-05	-0.00110795	8.14907e-09	0.00111138	-9.96026e-06	0.00184799	0.000525326	0.00118758	0.00026571
ACTGTGAGTAACATAG.1	-0.0111486	-0.000116634	-0.0760894	0.000845277	0.0100629	0.00293048	0.00110604	0.00671864	-0.000280926	0.00561576	-0.00136013	-0.0049799	-0.00117471	-0.00649178	-0.00688896	-0.0345501	0.00529456	1.51061e-05	0.000134146	-0.00257967	-0.00433334	0.00586458	0.00225063	-0.00545421	0.00405822	8.70731e-05	0.0853648	-0.000344021	-0.0015493	-0.0125998	0.0132594	-0.127003	-0.00894774	-7.74987e-05	-0.00272237	-0.00928068	5.80074e-06	-4.0913e-05	-0.00948837	0.00256134	1.60113e-05	0.00105812	8.41101e-09	0.00154979	-6.45174e-07	0.00184998	0.000445038	0.00111368	0.000265514
ACTTAGGCACGGTGAA.1	-0.0180023	0.000680975	-0.053399	-0.00328926	0.0246051	0.00316642	0.00123968	-5.64689e-05	-0.000297701	0.00152677	-0.00142964	-0.00406033	-0.00101528	-0.013842	-0.00645597	-0.0190175	0.00509692	2.72226e-05	0.000134857	-0.00261522	-0.00589478	0.00592815	0.00239168	-0.00543769	0.00403084	1.59815e-05	0.0793359	-0.000362409	-0.00238352	-0.022955	0.0284302	-0.112447	-0.013935	-9.99016e-05	-0.00273061	-0.0225941	6.50063e-06	-1.9962e-05	-0.0209628	0.00265316	1.22273e-05	0.00593854	1.25729e-08	0.00236862	5.82752e-06	0.00181026	0.00167277	0.00101491	0.000255041
ACTTAGGGTGAGATTA.1	-0.00350686	-0.00125952	-0.0569598	-0.000718268	0.000340948	0.00291708	0.0010747	0.00433915	-0.000258291	0.00117177	-0.00132619	-0.0037388	-0.00117601	-0.00159044	-0.00369863	-0.030756	0.00529644	1.61491e-05	0.000132931	0.00361435	-0.00311426	0.00578041	0.00208674	-0.00558452	0.00412738	0.000111612	0.0443948	-0.000324762	-0.00118043	-0.00803995	0.00885478	-0.00385341	-0.00698114	-6.54582e-05	-0.00272194	-0.00340506	-1.93715e-06	-4.6242e-05	-0.000623077	0.00257479	2.62558e-05	-0.000956502	8.14907e-09	0.00117527	-8.13301e-06	0.00183947	0.000425294	0.00118752	0.000265958
ACTTCCGAGCTTTCCC.1	-0.0034463	-0.00123384	-0.0384225	-0.00145033	0.00359647	0.00291266	0.00107617	0.00537942	-0.000248691	0.00117071	-0.00133533	-0.00362874	-0.00117615	-0.000130963	-0.00367089	-0.0295009	0.00529622	1.44877e-05	0.000133032	0.00353673	-0.00314172	0.00577146	0.00208028	-0.00557931	0.00413387	8.74512e-05	0.0263354	-0.000324344	-0.00107348	-0.00720862	0.00846594	-0.010341	-0.00616756	-6.40348e-05	-0.00272201	-0.00439529	-2.58721e-06	-4.93135e-05	-0.0054332	0.00256626	2.57604e-05	-0.00109324	8.14907e-09	0.00106569	-1.19142e-05	0.00184835	0.000491694	0.0011876	0.000265859
ACTTTCACACACTTAG.1	-0.0339148	0.00741775	0.00978333	-0.00285995	0.0122125	0.0037841	0.00139184	0.00024909	-0.000442714	0.00263498	-0.00111393	-0.00416967	-0.000817803	-0.0271454	-0.0124619	0.00452404	0.00482567	3.08305e-05	0.000137215	-0.0101032	-0.0140851	0.00611131	0.00349356	-0.00495678	0.00390661	6.62496e-06	0.022942	-0.000432087	-0.00393821	-0.0349454	0.0519293	-0.0141174	-0.0269728	-0.000159737	-0.00272196	-0.0338506	0.000221211	-4.20958e-07	-0.00552857	0.00268353	4.73484e-06	0.0102761	3.07336e-08	0.00393535	0.00011969	0.00171073	0.00303238	0.000801875	0.000238029
ACTTTCAGTGAACGGT.1	-0.00485933	-0.00104151	-0.0698953	0.000973292	0.00031542	0.00290566	0.00110008	0.00519228	-0.000260883	0.00119701	-0.00133976	-0.00370572	-0.00117558	-0.00300771	-0.00383874	-0.0317238	0.00529379	1.46702e-05	0.000133879	0.00256917	-0.00333655	0.00579244	0.00208847	-0.00554378	0.0041157	0.000125436	0.0389744	-0.000327883	-0.00120119	-0.00771989	0.00805427	0.0104478	-0.00662391	-6.58471e-05	-0.00272197	-0.00437549	-1.76579e-06	-4.75366e-05	-2.09808e-05	0.00255723	2.69599e-05	-0.000896249	8.3819e-09	0.00120282	-9.6648e-06	0.00185709	0.000443652	0.00115588	0.000265181
AGAACAAAGATTTGCC.1	-0.0144836	-0.000478692	-0.0705584	0.00113873	0.0102223	0.0029369	0.00111573	0.00805441	-0.000283847	0.0052407	-0.00139807	-0.00522483	-0.00117306	-0.00743531	-0.00714683	-0.0366883	0.00529253	1.60411e-05	0.00013392	-0.00343536	-0.00399944	0.00587623	0.00224474	-0.00542851	0.00404802	7.75866e-05	0.0855993	-0.000357961	-0.00168843	-0.0134936	0.0142249	-0.142812	-0.00913659	-8.13451e-05	-0.00272282	-0.0101186	5.77979e-06	-3.77074e-05	-0.00818637	0.00256059	1.47671e-05	0.00106859	8.44011e-09	0.0016933	-4.33065e-08	0.0018498	0.000478566	0.00109864	0.000265323
AGAACAACAACCGGAA.1	-0.00452999	-0.00129441	-0.0705518	-0.0131443	0.0106884	0.002917	0.00110283	0.00200332	-0.000263203	0.0011607	-0.0013354	-0.00372775	-0.00117566	0.00839257	-0.00371541	-0.0870104	0.00529472	1.50017e-05	0.000132883	0.00573591	-0.00319796	0.00579602	0.00209017	-0.00567885	0.00411118	3.53381e-05	0.0699049	-0.000324933	-0.00149764	-0.0104396	0.0141191	-0.0680386	-0.00691728	-6.57452e-05	-0.00272198	-0.00519884	-2.12342e-07	-3.84469e-05	-0.0151559	0.00266713	2.04109e-05	-0.000940368	8.11997e-09	0.00148049	-6.33067e-07	0.00185072	0.000478297	0.00118715	0.000265962
AGAACAACAGCCTATA.1	-0.00343632	-0.0012529	-0.0354137	-0.00219802	0.00129263	0.00290916	0.00107327	0.00497027	-0.00024969	0.00117188	-0.00133425	-0.0036255	-0.00117612	0.000778139	-0.00367416	-0.0282241	0.00529636	1.45361e-05	0.000133051	0.00423712	-0.00311325	0.00577199	0.00208693	-0.00558245	0.00413335	8.73786e-05	0.022927	-0.000324337	-0.00107457	-0.00704336	0.0083215	-0.00522959	-0.006387	-6.41597e-05	-0.00272201	-0.00373918	-2.03215e-06	-4.89485e-05	-0.00329706	0.00256953	2.61627e-05	-0.00108154	8.14907e-09	0.00106611	-1.13368e-05	0.0018435	0.000453323	0.00118763	0.000265956
AGAACAAGTGAGTAAT.1	-0.00368352	-0.0012644	-0.0542916	-0.00180536	0.00403271	0.00290915	0.00108418	0.00402189	-0.000251977	0.00117006	-0.00133316	-0.00363013	-0.00117601	-0.000403518	-0.00367667	-0.0472759	0.00529596	1.44467e-05	0.000132997	0.00332754	-0.00312979	0.005772	0.00209156	-0.00560798	0.00413316	7.30529e-05	0.042631	-0.000324374	-0.0011276	-0.00783071	0.00963289	-0.0158802	-0.00642416	-6.42338e-05	-0.002722	-0.00366443	-2.39536e-06	-4.90397e-05	-0.00548911	0.00259475	2.48104e-05	-0.00105541	8.14907e-09	0.00111631	-5.80284e-06	0.0018468	0.000438422	0.0011876	0.000265963
AGAACAATCATTGAGC.1	-0.00459598	-0.00139676	-0.0489454	-0.0102054	0.01167	0.00301565	0.00110727	0.0033845	-0.000256492	0.00116532	-0.00133271	-0.00358371	-0.00117592	0.00672325	-0.00370516	-0.0783044	0.00529573	1.44951e-05	0.000132997	0.00785449	-0.00319566	0.00579015	0.00209536	-0.00572985	0.00411678	3.48967e-05	0.0390235	-0.00032468	-0.00133577	-0.0090179	0.0126522	-0.0520099	-0.00744495	-6.50786e-05	-0.002722	-0.00538251	-2.75299e-06	-4.35095e-05	-0.0189669	0.00271703	2.1033e-05	-0.00118664	7.21775e-09	0.00131735	-2.57068e-06	0.00185294	0.000595719	0.00118718	0.000265958
AGAACCTAGGCACAAC.1	-0.00850627	-0.001492	-0.0892496	-0.0269089	0.00958642	0.00308385	0.00111883	0.00212644	-0.000288452	0.00110891	-0.00131897	-0.00368163	-0.00117541	0.0154997	-0.00402639	-0.0704918	0.00529054	2.23182e-05	0.000133131	0.0235897	-0.00346889	0.00587121	0.00225762	-0.00577711	0.00404589	6.4387e-06	0.0452913	-0.000331452	-0.00212966	-0.0170534	0.0248196	-0.130967	-0.00748048	-7.25695e-05	-0.002722	-0.00949785	1.1107e-05	-2.07266e-05	-0.0314091	0.00277322	1.30171e-05	0.000603162	7.91624e-09	0.0021223	6.65896e-08	0.00184599	0.000702128	0.0011833	0.000265962
AGAACCTAGTTCTACG.1	-0.00389498	-0.00126668	-0.035139	-0.00813905	0.00376959	0.00291323	0.00108858	0.00561497	-0.00025045	0.00116587	-0.00134059	-0.00361115	-0.00117615	0.00534587	-0.00370343	-0.0461961	0.00529594	1.49496e-05	0.00013298	0.00579056	-0.00313671	0.00578097	0.00210874	-0.00560382	0.0041255	5.66822e-05	0.0432284	-0.000324724	-0.00118435	-0.0083849	0.0105787	-0.0513536	-0.00539852	-6.47309e-05	-0.00272222	-0.00498247	3.62471e-06	-4.81233e-05	-0.00835115	0.00259075	2.15396e-05	-0.00106319	8.11997e-09	0.00116995	-7.64499e-06	0.0018464	0.000500426	0.00118751	0.000265963
AGAAGCGCAAACTGCT.1	-0.0149666	0.00196287	-0.0672626	-0.00253225	0.0221837	0.00314874	0.00123587	-0.00234897	-0.000297426	0.00155367	-0.00139706	-0.00404514	-0.00108416	-0.0149326	-0.00549018	-0.0200451	0.00515111	3.12999e-05	0.000133885	-0.00422691	-0.00714522	0.00591766	0.00230798	-0.00545506	0.00403254	1.73599e-05	0.0978254	-0.000356605	-0.00237229	-0.023292	0.0312241	-0.121983	-0.0158569	-9.72562e-05	-0.00272415	-0.0272202	6.71111e-06	-2.12155e-05	-0.0225973	0.00262509	1.24173e-05	0.00382308	1.3737e-08	0.00238614	7.14045e-06	0.00181907	0.00204198	0.00108667	0.000250693
AGAAGTACACAATCTG.1	-0.00383739	-0.00142913	-0.0507658	-0.00622605	0.00790359	0.0030632	0.00108857	0.00438232	-0.000250846	0.00116795	-0.00130655	-0.00365289	-0.0011761	0.00364836	-0.0036791	-0.0613172	0.00529658	1.44728e-05	0.000132989	0.00386202	-0.00315691	0.00579152	0.00214339	-0.00558995	0.0041159	5.60265e-05	0.0378682	-0.000324881	-0.00118065	-0.00819973	0.011756	-0.0333397	-0.00600535	-6.47536e-05	-0.002722	-0.00411558	4.67524e-07	-4.91608e-05	-0.0121907	0.00257657	2.2579e-05	-0.00112522	8.11997e-09	0.00116835	-8.08062e-06	0.00185578	0.000503793	0.00118753	0.000265846
AGAAGTACACAGTCCG.1	-0.00464759	-0.00130621	-0.0744292	-0.00941873	0.00968255	0.00293667	0.00109296	0.00247017	-0.000265706	0.00115919	-0.00132512	-0.00374142	-0.00117557	0.00431242	-0.00374762	-0.0801403	0.0052947	1.53519e-05	0.000132933	0.00563493	-0.00319703	0.00580128	0.00212314	-0.00567766	0.00410744	3.76198e-05	0.0722189	-0.000325089	-0.00154389	-0.0108163	0.0136618	-0.0701793	-0.00701331	-6.64243e-05	-0.002722	-0.00535792	1.09337e-06	-3.5787e-05	-0.0137174	0.0026674	2.00085e-05	-0.000831232	8.14907e-09	0.00152874	-8.16537e-07	0.00184941	0.000481874	0.0011872	0.00026596
AGAAGTACAGTCGTTA.1	-0.00329344	-0.00126495	-0.0263007	-0.000704356	-0.00106053	0.00290417	0.00107334	0.00578701	-0.000247999	0.00117451	-0.00132983	-0.00358769	-0.00117615	2.15713e-05	-0.00366364	-0.0215867	0.00529681	1.44839e-05	0.000133077	0.00256356	-0.00309087	0.0057626	0.00208044	-0.0055712	0.00414017	0.000131544	0.00204888	-0.0003243	-0.00101619	-0.00628031	0.0068698	0.0209192	-0.00701638	-6.38844e-05	-0.00271961	-0.00280978	-4.01214e-06	-5.1545e-05	0.00172561	0.00255811	2.87406e-05	-0.00108456	8.14907e-09	0.00101585	-1.3941e-05	0.00185478	0.000411853	0.00118805	0.000265963
AGACAAACAATGTCAC.1	-0.033316	0.00102128	0.0208594	-0.00701408	0.00866162	0.00418629	0.00144099	-0.00102007	-0.000427857	0.00146359	-0.000804643	-0.00401922	-0.000954005	-0.0242909	-0.0100233	0.00282338	0.00495674	3.67798e-05	0.000134643	-0.00173299	-0.00834298	0.00616858	0.00613227	-0.00505754	0.00381364	-2.41939e-05	0.0136184	-0.00040601	-0.00428063	-0.0359394	0.0550399	0.00384456	-0.0226692	-0.000164019	-0.00272149	-0.0338236	3.91882e-05	8.32882e-06	-0.0169449	0.00274917	4.38094e-06	0.0113855	7.03149e-08	0.00386167	0.00013147	0.0017677	0.00275753	0.000923141	0.000235792
AGACACTAGAGGATGA.1	-0.00586697	-0.00129108	-0.0793336	-0.00511029	0.00892424	0.00293113	0.00109821	0.00244345	-0.000269217	0.00115632	-0.00132871	-0.0039179	-0.00117438	-0.00124869	-0.00377837	-0.0679554	0.00529407	1.56127e-05	0.000133004	0.00411727	-0.00323058	0.00582436	0.00212143	-0.00570089	0.00408628	4.69014e-05	0.0909632	-0.000326699	-0.00163639	-0.012244	0.0149071	-0.0687975	-0.00771919	-6.88501e-05	-0.00272192	-0.00777966	-6.18398e-07	-3.35313e-05	-0.0125954	0.00269738	1.93734e-05	-0.000827018	8.14907e-09	0.00163068	-9.73232e-08	0.00184903	0.000500336	0.00118451	0.000265921
AGACAGGCACAAGTTC.1	-0.00347901	-0.00126108	-0.0566644	-0.000986034	-1.61286e-05	0.00291767	0.0010699	0.00412651	-0.000259288	0.00117159	-0.00132652	-0.00374726	-0.00117604	-0.00133185	-0.00368937	-0.0311284	0.00529643	1.51619e-05	0.000132943	0.00389676	-0.00311218	0.00578038	0.00208328	-0.00558713	0.0041268	0.000109011	0.04289	-0.000324717	-0.00118753	-0.00806079	0.00901888	-0.00199276	-0.00723533	-6.51189e-05	-0.00272166	-0.00333527	-2.92622e-06	-4.60688e-05	-0.000481457	0.00257696	2.63862e-05	-0.000994485	8.14907e-09	0.00118136	-7.94115e-06	0.00183882	0.000423878	0.00118749	0.000265958
AGACCCGCACTGCACG.1	-0.00369328	-0.00128982	-0.0573427	-0.00435734	0.00376204	0.00291745	0.0010895	0.0039081	-0.000252715	0.00116845	-0.00133901	-0.00360717	-0.001176	0.00189315	-0.00368476	-0.067894	0.00529606	1.44839e-05	0.000133032	0.00632949	-0.00314055	0.00577583	0.00210483	-0.00562261	0.00413091	6.44438e-05	0.0335488	-0.000324545	-0.00118028	-0.00805467	0.0102938	-0.0301679	-0.00668416	-6.47844e-05	-0.00272247	-0.00401729	-2.63378e-06	-4.57652e-05	-0.00849619	0.00260974	2.37897e-05	-0.00112531	8.09086e-09	0.00116723	-5.36884e-06	0.00185179	0.000463679	0.0011876	0.000265963
AGAGAATTCGTAATGC.1	-0.0223512	0.00177228	-0.024366	-0.000158622	0.0174971	0.00298773	0.00115325	0.00824249	-0.000297632	0.00434212	-0.00136346	-0.0057968	-0.00117269	-0.0102313	-0.0190544	-0.0333873	0.00528553	1.64658e-05	0.000135086	-0.00281471	-0.00643124	0.00590917	0.00348761	-0.00532514	0.00403175	3.89293e-05	0.0841844	-0.000397755	-0.00199696	-0.01811	0.0201448	-0.182484	-0.0078874	-9.63924e-05	-0.00272361	-0.0146019	8.48807e-06	-2.01277e-05	-0.0228027	0.00258662	1.20876e-05	0.0018457	9.19681e-09	0.00203279	2.84053e-08	0.00187311	0.000632927	0.000776466	0.000263244
AGAGAATTCTTCTAAC.1	-0.00384012	-0.0012259	-0.0921481	-0.000994562	0.00287225	0.00297531	0.00106677	0.00385635	-0.000264514	0.00116892	-0.00126289	-0.00387685	-0.00117576	-0.00264693	-0.00374361	-0.0580994	0.00529608	1.61417e-05	0.000133188	0.00293081	-0.00321551	0.0057976	0.00213094	-0.00559108	0.00410905	0.000101727	0.0528564	-0.000325529	-0.00134376	-0.00952533	0.00963139	-0.0172658	-0.0070745	-6.72461e-05	-0.00271574	-0.00457644	-2.84053e-06	-3.88268e-05	-0.00155729	0.00259046	2.45869e-05	-0.000786115	8.3819e-09	0.00134238	-3.94019e-06	0.00182828	0.000433236	0.00118609	0.000265954
AGAGAGCCAGACAAAT.1	-0.00621732	-0.0013753	-0.0912162	-0.0151881	0.0154227	0.00299351	0.00108498	0.000766148	-0.000276508	0.00114675	-0.00131454	-0.00382583	-0.00117112	0.00677738	-0.00381812	-0.0646155	0.00528929	1.55792e-05	0.000133079	0.00653627	-0.00327132	0.0058424	0.00212603	-0.00575457	0.00406873	2.00272e-05	0.082696	-0.000327235	-0.00184978	-0.0142158	0.0195389	-0.0925305	-0.00692006	-6.92829e-05	-0.00272192	-0.00754026	3.0864e-06	-2.95192e-05	-0.0212407	0.00274779	1.68849e-05	-0.000573464	8.14907e-09	0.00184219	8.20728e-09	0.00184899	0.000542358	0.00118569	0.000265915
AGAGCAGGTATCGTAC.1	-0.00350371	-0.00128526	-0.0482177	-0.00127174	0.00466882	0.00292249	0.00107815	0.00458386	-0.000249106	0.00117118	-0.0013342	-0.00363056	-0.00117615	-0.000315733	-0.00367255	-0.0411192	0.0052965	1.4443e-05	0.000133023	0.00295746	-0.00310804	0.00576968	0.0021018	-0.00558475	0.00413582	7.66274e-05	0.0298562	-0.000324605	-0.00108884	-0.00721649	0.00887995	-0.00981688	-0.00649011	-6.45223e-05	-0.002722	-0.00365899	-3.11993e-06	-5.02262e-05	-0.00570735	0.00257158	2.50973e-05	-0.00108926	8.14907e-09	0.00107896	-8.42358e-06	0.00185303	0.000439331	0.00118761	0.000265963
AGAGCAGGTTCGTAAC.1	-0.0125841	0.000367107	-0.0772834	-0.00419403	0.0297881	0.00311867	0.00129028	-0.00162708	-0.000297344	0.00123136	-0.00126921	-0.00370111	-0.00112479	-0.0141461	-0.00481899	-0.0288526	0.00518906	2.95844e-05	0.000133716	-0.0101764	-0.00561712	0.00594262	0.00216223	-0.00552082	0.00403304	2.03513e-05	0.0956106	-0.000371775	-0.00249354	-0.0237844	0.0343502	-0.124442	-0.0132172	-0.000107684	-0.00272222	-0.0239747	6.64685e-06	-1.97031e-05	-0.0283087	0.00267691	1.29156e-05	0.0052785	1.25729e-08	0.00246008	9.12463e-06	0.00181351	0.00151587	0.00114467	0.000250895
AGAGCCCCAGAGGAAA.1	-0.0121286	-0.000590106	-0.0737851	0.00129201	0.00833655	0.00293799	0.00111327	0.00789836	-0.000278526	0.00413219	-0.00139174	-0.00505354	-0.00117085	-0.00723506	-0.00544729	-0.0332781	0.00528966	1.48825e-05	0.000133961	-0.00260057	-0.00387255	0.0058603	0.00212906	-0.00544445	0.00405971	9.36855e-05	0.0867889	-0.000350697	-0.00169685	-0.0129714	0.0127662	-0.11556	-0.00874607	-7.88865e-05	-0.00272248	-0.00988048	5.87362e-06	-3.92925e-05	-0.00485703	0.00255877	1.66111e-05	4.65456e-05	8.17818e-09	0.00170037	-1.06869e-07	0.00185032	0.00047408	0.00112734	0.000265315
AGATAGAGTACGAGCA.1	-0.00956915	-0.000728579	-0.105392	8.97921e-05	0.0133155	0.00292394	0.00113126	0.005332	-0.000284312	0.00138637	-0.00142238	-0.00454054	-0.00110157	-0.00869759	-0.00436172	-0.0384314	0.00521993	1.52364e-05	0.000133775	-0.00167663	-0.00378764	0.0058511	0.00221947	-0.00553946	0.00406533	7.2727e-05	0.108137	-0.000351293	-0.00176878	-0.0151111	0.0141589	-0.0949136	-0.00975499	-7.78479e-05	-0.002722	-0.00898454	5.74812e-06	-3.61893e-05	-0.0116103	0.00257175	1.71773e-05	0.000301279	8.41101e-09	0.00177145	-4.47035e-08	0.00183909	0.00057359	0.00114481	0.00026528
AGATCGTCATGTGCTA.1	-0.0142445	0.000515174	-0.0905398	-0.000297437	0.0183322	0.00298967	0.0011632	0.00345825	-0.000295008	0.00153768	-0.00144978	-0.00436658	-0.00110292	-0.0115718	-0.00565426	-0.0346798	0.0052135	1.93678e-05	0.000134174	-0.000396654	-0.00525422	0.00588625	0.00228255	-0.00549151	0.00403819	4.58173e-05	0.0958066	-0.000359138	-0.00199418	-0.0181673	0.0189138	-0.133614	-0.0117506	-8.38487e-05	-0.00272231	-0.0131099	3.59677e-06	-2.50433e-05	-0.0161012	0.00258963	1.41617e-05	0.00311861	1.00117e-08	0.00199712	2.03494e-07	0.00181103	0.000899956	0.00101717	0.000262816
AGATGCTAGGCACTCC.1	-0.00496103	-0.00109467	-0.105615	0.00115941	0.0044024	0.00290636	0.00109201	0.00519388	-0.000267657	0.00143829	-0.00133915	-0.00426307	-0.00113105	-0.004501	-0.00434989	-0.0339684	0.00525007	1.46255e-05	0.00013339	0.00188701	-0.0032942	0.0057909	0.0021112	-0.00555778	0.00411782	0.000116356	0.0694194	-0.000337591	-0.00135511	-0.0095832	0.00908676	-0.051167	-0.00822697	-6.8464e-05	-0.00272259	-0.00538781	3.35835e-06	-4.64991e-05	-0.00354257	0.00255871	2.41436e-05	-0.000792157	8.14907e-09	0.0013568	-7.38143e-06	0.00185587	0.00042437	0.00117791	0.00026536
AGCCAATAGCGTATAA.1	-0.00328162	-0.00126493	-0.0264685	-0.000501546	-0.00101493	0.00290451	0.00107305	0.00581675	-0.000247885	0.00117455	-0.0013303	-0.00358352	-0.00117615	-0.000144206	-0.00366356	-0.0209161	0.00529684	1.44541e-05	0.000133084	0.00253479	-0.00309004	0.005764	0.00208059	-0.00557077	0.00414023	0.00013173	0.000989072	-0.000324285	-0.00100936	-0.00623994	0.00683232	0.0208213	-0.00702849	-6.38621e-05	-0.00272107	-0.00280064	-4.03635e-06	-5.15766e-05	0.0017713	0.00255759	2.87667e-05	-0.00108438	8.14907e-09	0.00100936	-1.40304e-05	0.00185443	0.000411719	0.00118808	0.000265963
AGCCAATCATCACAGT.1	-0.00479296	-0.00130363	-0.0674274	-0.0121358	0.0117858	0.00292738	0.00110015	0.00250433	-0.000263616	0.00115767	-0.00133351	-0.00371969	-0.00117552	0.00695826	-0.00373458	-0.0843921	0.00529458	1.4808e-05	0.000132916	0.00592756	-0.00320489	0.0057995	0.00210921	-0.005697	0.00410855	3.12943e-05	0.0723717	-0.000324963	-0.00155379	-0.0108586	0.0143577	-0.0793258	-0.00666881	-6.59993e-05	-0.00272198	-0.00575045	1.17719e-06	-3.73516e-05	-0.0167199	0.00268625	1.92299e-05	-0.000921551	8.09086e-09	0.00153628	-6.40517e-07	0.00185153	0.000495866	0.00118721	0.000265962
AGCCAATTCGTAGTCA.1	-0.00448443	-0.00131774	-0.0954178	-0.00303965	0.00464773	0.00302995	0.0010789	0.00306154	-0.000268603	0.00116685	-0.00123731	-0.00386266	-0.00117565	-0.0018178	-0.00380745	-0.0502856	0.00529585	1.57543e-05	0.000133557	0.00360638	-0.00322871	0.00581395	0.00212021	-0.00558327	0.00409589	7.75233e-05	0.0608923	-0.000325156	-0.00145408	-0.0107232	0.0108834	-0.0200906	-0.00683452	-6.70408e-05	-0.00272076	-0.00604439	-7.43195e-07	-3.68785e-05	-0.00379977	0.00258708	2.34842e-05	-0.000611905	8.3819e-09	0.00145307	-1.9283e-06	0.00184774	0.000469834	0.0011844	0.00026593
AGCGATTCAGACCAAG.1	-0.00397299	-0.00127538	-0.0358597	-0.00924013	0.00475082	0.00292198	0.00108963	0.00619281	-0.000251661	0.00116607	-0.00134436	-0.00361582	-0.00117612	0.00654476	-0.00370436	-0.0443517	0.00529604	1.46888e-05	0.000132982	0.00496659	-0.00314252	0.00578444	0.00214915	-0.00559476	0.00412236	5.73155e-05	0.0404508	-0.000324836	-0.00119878	-0.00828855	0.0105872	-0.0484955	-0.00567198	-6.49368e-05	-0.00272203	-0.0051516	2.1439e-06	-4.79165e-05	-0.00968462	0.00258201	2.19867e-05	-0.00108401	8.14907e-09	0.00118397	-7.83685e-06	0.00184678	0.000526279	0.0011875	0.000265963
AGCGCCAGTCATTGCA.1	-0.0143271	0.00159606	-0.0771328	-0.00164712	0.0231328	0.00306629	0.0012141	-0.000250685	-0.000297276	0.00151985	-0.00134748	-0.00411021	-0.00107302	-0.0149089	-0.00514845	-0.0266084	0.00514852	3.11527e-05	0.000133462	-0.00645982	-0.00656697	0.00590917	0.00233485	-0.00545749	0.00403349	2.67867e-05	0.110082	-0.000355875	-0.00228713	-0.0224939	0.0284369	-0.131013	-0.0154885	-9.37739e-05	-0.00272198	-0.0250771	6.30831e-06	-2.15434e-05	-0.0215876	0.00260291	1.31838e-05	0.00355334	1.44355e-08	0.00230488	6.06431e-06	0.00178898	0.00184332	0.00110444	0.000252873
AGCGCTGTCAAAGCCT.1	-0.00372722	-0.00130182	-0.0357777	-0.00597755	0.00548251	0.0029415	0.00109711	0.0069639	-0.000249627	0.00116826	-0.00133458	-0.00356925	-0.00116765	0.00360303	-0.00369581	-0.0505434	0.00528753	1.44728e-05	0.000133017	0.00399853	-0.00315472	0.00578255	0.00214964	-0.00560677	0.00412463	5.83027e-05	0.0358605	-0.000324784	-0.00115866	-0.00791261	0.00964198	-0.035138	-0.00585154	-6.47514e-05	-0.002722	-0.00480434	4.35673e-06	-4.58881e-05	-0.00983778	0.00259414	2.29031e-05	-0.00109641	8.14907e-09	0.00114548	-9.90066e-06	0.00184952	0.00053452	0.00118759	0.000265937
AGCTCAATCGCAATTG.1	-0.0106473	-0.000597754	-0.0893221	0.000144803	0.0128163	0.00291917	0.00111376	0.0070636	-0.000282393	0.00173894	-0.00137328	-0.00450574	-0.00116572	-0.00750036	-0.00501825	-0.0281224	0.00528566	1.45063e-05	0.000134125	-0.00251273	-0.00388684	0.0058546	0.0021126	-0.00550154	0.00406355	7.42842e-05	0.0992389	-0.000349006	-0.00175544	-0.0138313	0.0130942	-0.111573	-0.00922297	-7.7334e-05	-0.00272198	-0.00864744	5.96116e-06	-3.4485e-05	-0.0117629	0.00256516	1.6436e-05	0.000446152	8.17818e-09	0.00175729	-7.31088e-08	0.00185037	0.000464618	0.00111914	0.000265665
AGCTCAATCTTCTCAA.1	-0.00412419	-0.00126999	-0.0297781	-0.0130668	0.00535547	0.00294212	0.00109428	0.00679534	-0.000250769	0.00116282	-0.00134854	-0.00361555	-0.00117615	0.0100205	-0.0037334	-0.0511679	0.00529599	1.51545e-05	0.000132978	0.00574932	-0.00318283	0.0057889	0.0021427	-0.00560482	0.00411873	4.52455e-05	0.0432657	-0.000325179	-0.00122173	-0.00863165	0.0116822	-0.0594332	-0.00559237	-6.50941e-05	-0.00272204	-0.00588268	3.80911e-06	-4.7639e-05	-0.0121489	0.00259224	2.05729e-05	-0.00107605	8.11997e-09	0.00120593	-7.18469e-06	0.00185157	0.000595242	0.00118748	0.000265954
AGCTTCCGTCGCACGT.1	-0.0101773	-0.000325859	-0.0987042	-0.000126795	0.0106401	0.00292914	0.00114029	0.00431086	-0.000280399	0.00161834	-0.00139977	-0.00446283	-0.00115775	-0.0076305	-0.00530943	-0.0517626	0.00527555	1.47149e-05	0.000134028	0.00147914	-0.00423117	0.00584299	0.00219038	-0.00554347	0.00407078	7.20937e-05	0.0871413	-0.000351382	-0.00178714	-0.014172	0.0134399	-0.0949017	-0.0108184	-7.57299e-05	-0.0027238	-0.00622988	2.04891e-06	-3.09125e-05	-0.0119771	0.00257786	1.7317e-05	0.000257306	8.3819e-09	0.00178714	-1.75554e-07	0.00184955	0.000467367	0.00113078	0.000265082
AGGAAATAGGAGGGTG.1	-0.00335338	-0.00125113	-0.0301315	0.000701889	-0.000647098	0.00290335	0.00107278	0.00601378	-0.000248444	0.00117456	-0.0013306	-0.00360185	-0.00117615	-0.00155227	-0.00367163	-0.0151676	0.00529678	1.49719e-05	0.000133058	0.00228177	-0.0031039	0.00576594	0.00208399	-0.0055691	0.00413888	0.000134123	0.0126978	-0.000324754	-0.00104402	-0.0064565	0.00682887	0.0186759	-0.00709484	-6.39765e-05	-0.002722	-0.00294428	-4.05684e-06	-5.12563e-05	0.0010258	0.00255895	2.86028e-05	-0.00109361	8.14907e-09	0.00104521	-1.39261e-05	0.00185686	0.000412911	0.00118747	0.000265941
AGGAAATTCGTAGTCA.1	-0.00359805	-0.00125617	-0.0458922	-0.000802902	0.00379688	0.00290984	0.00107972	0.00490279	-0.000249272	0.00117133	-0.00133402	-0.00358991	-0.00117616	-0.000988539	-0.00366507	-0.0362787	0.00529649	1.44392e-05	0.000133019	0.00293214	-0.00312843	0.00577077	0.00208395	-0.00558282	0.00413451	8.21687e-05	0.0311426	-0.000324314	-0.00108596	-0.00737863	0.00901994	-0.00636435	-0.00615324	-6.41262e-05	-0.002722	-0.0041697	-1.19209e-06	-5.02001e-05	-0.00499073	0.00256965	2.58237e-05	-0.00109879	8.14907e-09	0.00107847	-9.9102e-06	0.00185069	0.000487626	0.00118759	0.000265948
AGGAATACAAGTCGTT.1	-0.0281817	0.00585034	-0.0108988	-0.00273674	0.0204192	0.00344401	0.00135442	0.00112527	-0.000324836	0.0027508	-0.00103409	-0.0044573	-0.000719922	-0.0226561	-0.00969574	-0.00664093	0.00477335	2.76845e-05	0.000136547	-0.0131562	-0.0118056	0.00599704	0.00303083	-0.00517903	0.00399364	1.73645e-05	0.0408323	-0.000413431	-0.0034264	-0.0310589	0.0428715	-0.0682578	-0.0218935	-0.000142117	-0.00272202	-0.0297106	6.13611e-05	-1.33873e-05	-0.00182015	0.00268232	1.12876e-05	0.0105097	1.70548e-08	0.00345668	7.35708e-05	0.00174696	0.0028851	0.000808209	0.000246361
AGGACGAAGAAGTCCG.1	-0.0106469	0.000268256	-0.0744528	0.00123507	0.00967318	0.00292884	0.00110613	0.0064383	-0.00028138	0.00621818	-0.00134759	-0.00533392	-0.001175	-0.00632918	-0.00691104	-0.0353614	0.00529538	1.51806e-05	0.000134129	-0.00223789	-0.00470409	0.00586503	0.00222129	-0.00547215	0.00405896	9.06456e-05	0.0861979	-0.000342159	-0.00149027	-0.0124026	0.0129898	-0.123334	-0.00935353	-7.72854e-05	-0.0027226	-0.00935233	5.838e-06	-4.4046e-05	-0.00925946	0.00256354	1.63782e-05	0.00112065	8.41101e-09	0.00149065	-7.22939e-07	0.00184895	0.00045234	0.00112227	0.000265738
AGGATAATCGCAATTG.1	-0.00318912	-0.00127477	-0.0241742	0.000664907	-0.0011246	0.00290566	0.00107034	0.00592085	-0.000247641	0.00117479	-0.00133387	-0.00358257	-0.00117616	-0.00118063	-0.00366217	-0.0146349	0.00529681	1.4551e-05	0.000133082	0.00236576	-0.00309	0.00576372	0.00208912	-0.00556934	0.00414119	0.000135258	-0.00173491	-0.000324262	-0.000998341	-0.00611053	0.00671697	0.0223323	-0.00706215	-6.37828e-05	-0.002722	-0.00278461	-4.10527e-06	-5.16195e-05	0.00160474	0.00255606	2.9061e-05	-0.00108894	8.14907e-09	0.000999252	-1.50399e-05	0.00186393	0.000413373	0.00118826	0.000265934
AGGATCTGTACCGGAA.1	-0.00390001	-0.00127015	-0.0669867	-0.00535086	0.00416765	0.00290468	0.00107607	0.00284287	-0.000256565	0.00116714	-0.00134002	-0.00372721	-0.00117598	0.00213628	-0.00368879	-0.0548797	0.00529572	1.45733e-05	0.000132998	0.00502472	-0.0031322	0.0057803	0.0021184	-0.0056219	0.00412568	6.30859e-05	0.054767	-0.000324478	-0.00124931	-0.00892963	0.0110685	-0.0341713	-0.00579972	-6.46525e-05	-0.002722	-0.00435707	2.95043e-06	-4.49829e-05	-0.00682637	0.00260931	2.3555e-05	-0.00100977	8.14907e-09	0.00123446	-4.03333e-06	0.00184973	0.000449449	0.00118775	0.000265963
AGGCATTCAGTATTCG.1	-0.0048303	-0.00131878	-0.0755061	-0.0126488	0.0117401	0.002944	0.00109066	0.00290894	-0.000264984	0.00115725	-0.0013306	-0.00371561	-0.00117551	0.00730887	-0.00376636	-0.0808245	0.00529449	1.53258e-05	0.000132974	0.0062797	-0.00320234	0.00580316	0.0021298	-0.00570038	0.00410617	3.0309e-05	0.0700121	-0.000325253	-0.00154757	-0.0110234	0.0139672	-0.0811982	-0.00664562	-6.64436e-05	-0.002722	-0.00533062	2.61329e-06	-3.67612e-05	-0.0170042	0.00268961	1.92132e-05	-0.000778943	8.11997e-09	0.00153094	-8.00705e-07	0.00184986	0.000498444	0.0011872	0.000265962
AGGCATTGTGTCTTCC.1	-0.00391535	-0.00128603	-0.0428064	-0.00598696	0.00589518	0.00291452	0.00110449	0.00302513	-0.000254092	0.00116827	-0.00133829	-0.00359321	-0.00117588	0.00348469	-0.00368227	-0.0806212	0.00529573	1.45398e-05	0.000132982	0.0057325	-0.00316573	0.00578169	0.00208963	-0.0056318	0.00412381	5.96754e-05	0.0330466	-0.000324389	-0.00120385	-0.00806535	0.0111267	-0.034419	-0.00723974	-6.45486e-05	-0.002722	-0.00414857	-2.92994e-06	-4.62532e-05	-0.010107	0.00261864	2.30186e-05	-0.00109867	7.85803e-09	0.00118989	-4.24753e-06	0.00185326	0.000487655	0.00118753	0.000265963
AGGCCACTCTAGAACC.1	-0.00316741	-0.0013011	-0.023494	0.000756929	-0.00115057	0.00290458	0.00106949	0.00593318	-0.000247584	0.00117488	-0.00133619	-0.00359228	-0.00117616	-0.00124391	-0.00366169	-0.0125656	0.00529682	1.44839e-05	0.000133084	0.00231461	-0.00308903	0.00576363	0.00209143	-0.00556886	0.00414141	0.000136368	-0.00230625	-0.000324262	-0.0010011	-0.00609228	0.00669771	0.023211	-0.00706283	-6.37781e-05	-0.002722	-0.00277464	-4.11458e-06	-5.16232e-05	0.00163311	0.00255556	2.91467e-05	-0.00109059	8.14907e-09	0.00100261	-1.52597e-05	0.00189144	0.000412166	0.00118873	0.000265934
AGGGAGTAGCTCCCTT.1	-0.0139758	-7.05291e-05	-0.0996573	-7.8931e-05	0.0167326	0.00294044	0.0011487	0.00258031	-0.000293378	0.00138188	-0.00137469	-0.00438922	-0.00116026	-0.0117209	-0.00499638	-0.040991	0.00528025	1.44802e-05	0.000134546	0.000843583	-0.00455973	0.00587276	0.00212514	-0.00550225	0.00404984	5.43706e-05	0.110792	-0.000371968	-0.00208403	-0.0181425	0.0173288	-0.116587	-0.0109026	-8.502e-05	-0.002722	-0.0118051	4.22448e-06	-2.37655e-05	-0.0187362	0.00258088	1.36942e-05	0.000465665	8.17818e-09	0.00210268	2.6077e-08	0.00185071	0.000517011	0.00107334	0.000265354
AGGGAGTCACCAGGTC.1	-0.00370169	-0.00118653	-0.0320599	0.000969639	-0.000586862	0.00290445	0.00107011	0.00563802	-0.000254895	0.00118821	-0.00133367	-0.0036809	-0.00117583	-0.00269152	-0.0036909	-0.0187375	0.0052949	1.46329e-05	0.000132991	0.00193791	-0.00318	0.0057758	0.00209224	-0.00557332	0.00413026	0.000134798	0.0424284	-0.000328457	-0.0011413	-0.00739059	0.00774783	0.0106624	-0.00783916	-6.57814e-05	-0.00272213	-0.00362107	-4.04753e-06	-4.96209e-05	0.000695765	0.00256835	2.76752e-05	-0.00109635	8.14907e-09	0.00114588	-9.66038e-06	0.0018561	0.000417471	0.00118595	0.000265447
AGGGCCTCACATTGTG.1	-0.00755965	-0.00116552	-0.09789	-0.00150858	0.0175202	0.00301091	0.00111645	0.0026735	-0.000284146	0.00116096	-0.00125581	-0.00400052	-0.00117355	-0.00718966	-0.00415425	-0.0341987	0.00528471	2.15098e-05	0.000133647	5.91725e-05	-0.00351319	0.00586361	0.0025113	-0.00552638	0.00405495	4.69144e-05	0.0854894	-0.0003314	-0.00176393	-0.0146736	0.0159815	-0.0669733	-0.00945226	-7.34269e-05	-0.00272257	-0.00972629	1.99676e-06	-3.43248e-05	-0.0157124	0.00258186	1.88239e-05	0.000746936	9.54606e-09	0.0017639	-7.24103e-08	0.00183567	0.000658065	0.00113427	0.000263114
AGGGTCCAGGTTGGTG.1	-0.00367491	-0.00128116	-0.0380129	-0.0052122	0.00527259	0.00292803	0.00109432	0.0064653	-0.000250784	0.00116809	-0.00133681	-0.00357869	-0.00116963	0.00272771	-0.00369473	-0.048768	0.00528958	1.44802e-05	0.000132997	0.00397372	-0.0031534	0.00578313	0.00215913	-0.00560759	0.00412424	6.33206e-05	0.0397941	-0.000324858	-0.00116843	-0.00803408	0.0100597	-0.0356162	-0.00580052	-6.48679e-05	-0.002722	-0.00472015	3.08268e-06	-4.60371e-05	-0.00954977	0.00259497	2.28994e-05	-0.00109874	8.14907e-09	0.0011541	-9.01963e-06	0.00184284	0.000535488	0.0011876	0.000265945
AGGGTGACAGAGGAAA.1	-0.00984296	-0.000922863	-0.115324	-0.000974229	0.0186399	0.00299839	0.00115485	0.00105076	-0.000290351	0.00122784	-0.00138868	-0.00416204	-0.00109997	-0.00999652	-0.00416893	-0.0428355	0.00521055	2.24151e-05	0.00013336	-0.00113021	-0.00379777	0.00587036	0.00237523	-0.00555457	0.00404877	5.49965e-05	0.107451	-0.000348268	-0.00192148	-0.0170805	0.020216	-0.100029	-0.010908	-8.03708e-05	-0.002722	-0.0121277	5.92507e-06	-2.98321e-05	-0.0179218	0.00258838	1.64136e-05	0.00131481	9.54606e-09	0.00192165	2.84053e-08	0.00182856	0.000833929	0.00115106	0.000262827
AGGGTGAGTTAAACCC.1	-0.0190681	0.00230848	-0.0641317	-0.00159134	0.0193256	0.00301526	0.0011905	0.0027333	-0.000297654	0.00192368	-0.0013903	-0.0043449	-0.000964921	-0.0135011	-0.00712188	-0.0262608	0.00505318	2.24523e-05	0.000134744	-0.00349277	-0.0071833	0.00591212	0.00236408	-0.00540458	0.00403072	3.02773e-05	0.0845638	-0.000365121	-0.00221762	-0.0212887	0.0243421	-0.141965	-0.0143351	-9.32552e-05	-0.00272228	-0.0194113	5.21261e-06	-2.39797e-05	-0.00918421	0.00262671	1.27945e-05	0.00546731	1.09721e-08	0.0022182	4.88828e-06	0.00177068	0.00154616	0.000946246	0.000256183
AGGGTTTTCCCTAGGG.1	-0.00356057	-0.00124931	-0.066312	-2.61692e-05	0.000695411	0.00292446	0.00107767	0.00454143	-0.000259059	0.00117182	-0.0013128	-0.00376327	-0.00117593	-0.00239727	-0.00370786	-0.0341101	0.00529645	1.68048e-05	0.000132961	0.00315354	-0.00312504	0.00578425	0.00209055	-0.00557908	0.00412464	0.000117401	0.0454818	-0.000324978	-0.00120804	-0.00818219	0.00851353	-0.000283271	-0.00702694	-6.59565e-05	-0.00272139	-0.00352544	-2.8722e-06	-4.54057e-05	-0.000118285	0.00257184	2.62745e-05	-0.000900034	8.3819e-09	0.00120626	-7.79028e-06	0.00183355	0.000420943	0.00118733	0.000265958
AGGTAGGAGAGGCGTT.1	-0.0037111	-0.00125245	-0.054381	-0.0011106	0.00338951	0.00290983	0.00108624	0.00384588	-0.000253065	0.00117085	-0.00133147	-0.00360845	-0.00117604	-0.00119501	-0.00367195	-0.0422962	0.00529605	1.4443e-05	0.000133	0.00294986	-0.00314	0.00577135	0.00208305	-0.00561219	0.00413364	7.24979e-05	0.0446541	-0.000324314	-0.00112187	-0.00790495	0.00999353	-0.0116523	-0.00637219	-6.4097e-05	-0.002722	-0.00366336	-2.87965e-06	-4.89689e-05	-0.00469235	0.00259896	2.56225e-05	-0.00105499	8.14907e-09	0.00111218	-5.92042e-06	0.00184094	0.000435591	0.0011876	0.000265963
AGGTAGGCACCAAATC.1	-0.00352598	-0.00125968	-0.0501401	-0.000984856	0.00124951	0.00290972	0.00107522	0.00435663	-0.000254784	0.00117202	-0.00133204	-0.00367254	-0.00117613	-0.00100431	-0.00367555	-0.0347605	0.00529633	1.44541e-05	0.000132976	0.0034394	-0.00312316	0.00577456	0.00208059	-0.00559163	0.00413066	8.72929e-05	0.0391125	-0.000324382	-0.0011145	-0.00765822	0.00905578	-0.00362787	-0.00682111	-6.41984e-05	-0.00272198	-0.00368467	-2.89641e-06	-4.88479e-05	-0.00244766	0.00257868	2.64458e-05	-0.00106957	8.14907e-09	0.00110639	-8.05128e-06	0.00184251	0.000441462	0.00118751	0.000265963
AGGTAGGTCTGCAGCG.1	-0.00332754	-0.00126345	-0.0341915	-0.000792203	-0.000901366	0.00290463	0.00107442	0.00541614	-0.000249305	0.00117364	-0.00132969	-0.00361999	-0.00117615	-0.000247043	-0.00366677	-0.029352	0.00529665	1.47633e-05	0.000133008	0.00298395	-0.00310051	0.0057558	0.00208448	-0.00557314	0.00413654	0.000124987	0.0117647	-0.000324374	-0.00107042	-0.00666326	0.00728241	0.0130531	-0.00716487	-6.42544e-05	-0.00270789	-0.00276986	-3.79048e-06	-5.12134e-05	0.00103408	0.00256117	2.80216e-05	-0.00106813	8.14907e-09	0.00106827	-1.22497e-05	0.00185118	0.000412375	0.00118776	0.000265963
AGGTGTTGTGCAGTGA.1	-0.00344897	-0.00125297	-0.0587339	-0.000186392	0.000507322	0.0029138	0.00107196	0.00483051	-0.000255797	0.00117197	-0.00132162	-0.00372356	-0.00117597	-0.0018748	-0.00368491	-0.0366746	0.00529643	1.54003e-05	0.000132963	0.00317341	-0.0031069	0.00577791	0.00210543	-0.00558379	0.00412723	0.000117969	0.0390343	-0.000324776	-0.00117378	-0.00778127	0.00818413	0.00064522	-0.0071996	-6.5175e-05	-0.00271681	-0.00301567	-3.60236e-06	-4.82053e-05	-0.000460207	0.00257452	2.67178e-05	-0.00100172	8.14907e-09	0.0011708	-8.64337e-06	0.00183488	0.000414386	0.00118747	0.000265962
AGGTTACAGGACTATA.1	-0.0063364	-0.00152938	-0.0906592	-0.00292562	0.0107734	0.00313346	0.0010956	0.000966697	-0.000294225	0.00114501	-0.000923893	-0.00403668	-0.00117161	-0.00723168	-0.00410323	-0.0284688	0.00528225	3.45961e-05	0.00013271	0.000595219	-0.00328523	0.00588026	0.00261231	-0.00549152	0.00406407	5.69522e-05	0.0868021	-0.000326624	-0.00204926	-0.0163179	0.0185861	-0.054742	-0.0112915	-7.79454e-05	-0.00272458	-0.0106304	4.58024e-06	-3.44627e-05	-0.0059616	0.00257808	1.6015e-05	0.00202338	1.55997e-08	0.0020476	-4.23752e-08	0.00183399	0.000532612	0.00117537	0.000262354
AGGTTACCACTACCGG.1	-0.00412646	-0.00128606	-0.0583304	-0.00813122	0.0084006	0.00291103	0.00109347	0.00234318	-0.000254466	0.00116462	-0.0013423	-0.00364663	-0.00117577	0.00483117	-0.00370436	-0.0768045	0.00529547	1.50055e-05	0.000132957	0.00635437	-0.00316745	0.00578522	0.0020887	-0.00564383	0.00412233	4.80767e-05	0.0471864	-0.000324665	-0.00129269	-0.00892109	0.012441	-0.0533697	-0.00627286	-6.51795e-05	-0.002722	-0.00457454	-1.11759e-06	-4.36902e-05	-0.0134225	0.00263122	2.1508e-05	-0.00106703	7.79983e-09	0.00127561	-3.1651e-06	0.00185431	0.000469819	0.00118739	0.000265963
AGGTTACTCTACTATC.1	-0.0183417	-0.000319524	-0.082405	0.00105117	0.0100165	0.00304557	0.00115978	0.00218336	-0.000297815	0.00334551	-0.0013442	-0.00553406	-0.00113086	-0.0112991	-0.0134195	-0.0532437	0.00524191	1.50725e-05	0.000135485	0.00735668	-0.00440397	0.00589241	0.00298632	-0.00543712	0.00403636	4.46737e-05	0.0830104	-0.000388047	-0.00209656	-0.0177303	0.0203194	-0.141781	-0.00968475	-9.12486e-05	-0.00272456	-0.00953046	6.00517e-06	-1.62963e-05	-0.0193944	0.00257558	1.23428e-05	0.00164849	8.3819e-09	0.00210703	5.35511e-09	0.00184545	0.000579506	0.00103851	0.000263175
AGGTTGTGTAGATCCT.1	-0.0089117	-0.000651821	-0.0889825	0.000128978	0.00878019	0.0029148	0.00111025	0.0071598	-0.000277432	0.00188095	-0.00135744	-0.00435429	-0.00117285	-0.00602772	-0.00489467	-0.026148	0.00529167	1.45808e-05	0.000134081	-0.00170344	-0.00378998	0.00584126	0.00209992	-0.00551456	0.00407535	9.27076e-05	0.0909997	-0.000345422	-0.00155895	-0.012225	0.0113215	-0.0920039	-0.00888798	-7.46353e-05	-0.00272203	-0.00841233	9.71556e-06	-3.94955e-05	-0.00733259	0.00256392	1.8144e-05	-4.55603e-05	8.17818e-09	0.00155907	-6.92904e-07	0.00185122	0.000456616	0.001129	0.000265442
AGTACTGTCGGTAGGA.1	-0.00358776	-0.00123885	-0.0388583	-0.00111564	0.00414712	0.00290975	0.0010775	0.00563513	-0.00024881	0.00116942	-0.00133706	-0.00360108	-0.00117616	-0.000804808	-0.00367183	-0.0342104	0.00529548	1.44467e-05	0.000133017	0.00361341	-0.00313944	0.00577626	0.0020821	-0.00558774	0.00412968	8.22656e-05	0.0324603	-0.000324374	-0.00109423	-0.00751491	0.00911927	-0.0259423	-0.00593407	-6.41288e-05	-0.00272203	-0.0045332	-2.68221e-07	-4.92744e-05	-0.00625974	0.00257472	2.44193e-05	-0.00110674	8.11997e-09	0.00108302	-1.02713e-05	0.00184582	0.000502616	0.00118761	0.000265686
AGTCACAAGATTGAGT.1	-0.00364703	-0.00125166	-0.0453556	-0.0011089	0.00428263	0.00290663	0.00108319	0.00532477	-0.000249321	0.0011705	-0.00132835	-0.00358196	-0.00117614	-0.000934493	-0.0036688	-0.03802	0.00529632	1.4443e-05	0.000133013	0.00299657	-0.00312828	0.00577292	0.00208141	-0.00558679	0.00413283	7.7812e-05	0.0355093	-0.000324314	-0.00110193	-0.0076192	0.00917048	-0.0149356	-0.0058452	-6.41906e-05	-0.00272203	-0.00440404	5.02914e-07	-4.89876e-05	-0.00576088	0.00257364	2.50973e-05	-0.00109619	8.14907e-09	0.00109409	-9.73325e-06	0.00184715	0.000480443	0.00118759	0.000265932
AGTCACACAAGGCCTC.1	-0.00389272	-0.00127879	-0.0662978	-0.00526682	0.00339104	0.0029099	0.00107754	0.00381621	-0.000258774	0.00116765	-0.00133966	-0.00369098	-0.00117584	0.00215462	-0.00369292	-0.0535103	0.00529578	1.44839e-05	0.000133021	0.00621467	-0.00314208	0.0057822	0.00210604	-0.00561835	0.0041237	6.15288e-05	0.0465306	-0.000324531	-0.00125873	-0.00879029	0.0106791	-0.0366828	-0.0057696	-6.46487e-05	-0.002722	-0.00443342	4.47035e-07	-4.65959e-05	-0.00767508	0.00260578	2.37189e-05	-0.00102691	8.11997e-09	0.00124403	-5.24009e-06	0.00185195	0.000470445	0.00118743	0.000265963
AGTCACACACAGTGAG.1	-0.00658384	-0.00141318	-0.0999594	-0.00788318	0.0143811	0.0030437	0.00108691	-0.000322708	-0.000281322	0.00114334	-0.00128496	-0.0039308	-0.00116071	-0.00128178	-0.00385675	-0.0482363	0.00527938	2.00681e-05	0.00013308	0.00380607	-0.00328654	0.00585154	0.00214835	-0.00566888	0.00406025	3.65861e-05	0.0971906	-0.000330305	-0.0018836	-0.0150897	0.0209419	-0.0800015	-0.00873506	-7.25527e-05	-0.00271966	-0.00989389	2.95788e-06	-2.77013e-05	-0.0194199	0.0026686	1.71009e-05	-0.000187354	8.61473e-09	0.00188264	1.90921e-08	0.00184674	0.000620455	0.00117829	0.000265554
AGTCTCCAGAAATGGG.1	-0.00364344	-0.00124168	-0.045911	-0.000400922	0.00346959	0.00290662	0.00107995	0.00481431	-0.000249827	0.00117154	-0.0013333	-0.00359645	-0.00117616	-0.00150916	-0.00366483	-0.0335785	0.00529655	1.44392e-05	0.000133017	0.00265292	-0.00313747	0.00576983	0.00208456	-0.00558727	0.00413548	8.43294e-05	0.0361159	-0.000324285	-0.00108943	-0.00750452	0.00912626	-0.00326693	-0.00611297	-6.41054e-05	-0.002722	-0.00421506	-2.54996e-06	-4.99878e-05	-0.004549	0.00257407	2.61851e-05	-0.00108762	8.14907e-09	0.0010831	-9.56934e-06	0.00184774	0.000471413	0.0011876	0.000265963
AGTGCCGGTCTTGCTC.1	-0.0178752	0.000927192	-0.0442524	-6.84555e-05	0.0172716	0.00292721	0.0011357	0.00654286	-0.000294358	0.00416001	-0.00141423	-0.00606636	-0.00116999	-0.00790959	-0.00950617	-0.0351015	0.0052883	1.76504e-05	0.000134734	-0.00325718	-0.00544582	0.00590902	0.00256394	-0.00538731	0.00403572	5.07515e-05	0.0814018	-0.000383338	-0.00176121	-0.0160064	0.0173807	-0.169554	-0.0092625	-9.63076e-05	-0.00272404	-0.00924209	4.99748e-06	-3.08864e-05	-0.018417	0.0025619	1.27517e-05	0.00315769	8.90577e-09	0.00175624	2.7474e-08	0.00184045	0.000567242	0.000927909	0.00026531
AGTGCCGTCTTAAGGC.1	-0.00383335	-0.00126284	-0.0597806	-0.00492526	0.00288493	0.00290566	0.00107189	0.00302112	-0.000257225	0.00116829	-0.00134164	-0.00372181	-0.00117611	0.00198695	-0.00368988	-0.0454211	0.005296	1.4551e-05	0.000133008	0.00516841	-0.00312681	0.00577977	0.00215317	-0.00560385	0.00412545	6.85845e-05	0.0520527	-0.000324426	-0.00121237	-0.00864812	0.010782	-0.028352	-0.00554258	-6.44117e-05	-0.002722	-0.00479472	4.19654e-06	-4.61172e-05	-0.00570843	0.00259141	2.42442e-05	-0.00102841	8.14907e-09	0.00119814	-6.11367e-06	0.00184534	0.000463039	0.00118822	0.000265963
AGTGTTGCATGTACGT.1	-0.0033814	-0.00125752	-0.0474972	-0.000350195	-0.000207905	0.00290732	0.00106974	0.00507588	-0.000251944	0.00117233	-0.00132713	-0.00366427	-0.00117614	-0.00116419	-0.00367275	-0.0367847	0.00529655	1.50055e-05	0.000132963	0.00321976	-0.00310077	0.0057451	0.00211994	-0.0055826	0.00413154	0.000118507	0.0251151	-0.000324545	-0.0011248	-0.00717825	0.00778285	0.00213274	-0.00744246	-6.46518e-05	-0.00268974	-0.00277445	-3.7346e-06	-5.02374e-05	-1.41263e-05	0.0025721	2.72095e-05	-0.00105168	8.14907e-09	0.00112158	-1.02604e-05	0.00184128	0.000412345	0.00118757	0.000265963
AGTGTTGGTGCCTATA.1	-0.0147018	-0.00033863	-0.0764188	0.000127318	0.0167283	0.00292072	0.00112151	0.00610819	-0.000290855	0.00324631	-0.0013926	-0.00510006	-0.00116862	-0.00838868	-0.00586143	-0.0319492	0.00528847	1.48006e-05	0.000134392	-0.00353054	-0.00415899	0.00587438	0.00216483	-0.00545946	0.00404842	6.88508e-05	0.103868	-0.000360003	-0.00182964	-0.0153312	0.0156687	-0.138572	-0.00960243	-8.25466e-05	-0.00272203	-0.0113051	5.92181e-06	-3.51481e-05	-0.0138644	0.00256342	1.43629e-05	0.00122879	8.20728e-09	0.00184181	1.50176e-08	0.00184982	0.000549406	0.00107523	0.000265554
AGTTAGCCACTATGTG.1	-0.0225638	0.000803315	-0.0425077	-0.00151521	0.0199262	0.00292671	0.00113174	0.00717302	-0.000295743	0.00911627	-0.00138863	-0.00557871	-0.00117299	-0.00756069	-0.00929122	-0.0292452	0.0052914	1.60262e-05	0.000134559	-0.00649776	-0.00528934	0.00589059	0.00221744	-0.0053879	0.00403572	6.09942e-05	0.102485	-0.000376722	-0.00179366	-0.0166061	0.018306	-0.177665	-0.00963897	-8.77778e-05	-0.0027231	-0.0152476	5.94277e-06	-3.2207e-05	-0.0166309	0.00257593	1.27843e-05	0.00225854	8.67294e-09	0.00181307	1.13156e-07	0.00184855	0.000687152	0.00097385	0.000264943
AGTTCGACAGAGAATT.1	-0.00356285	-0.00123896	-0.0402133	-0.000302421	0.00360567	0.00290645	0.00108097	0.00528265	-0.00024887	0.00117125	-0.00133321	-0.00358963	-0.00117616	-0.00144324	-0.003665	-0.0313965	0.00529662	1.4443e-05	0.000133021	0.00287583	-0.00313829	0.00576904	0.00208019	-0.00558098	0.00413616	9.22065e-05	0.0313801	-0.000324285	-0.0010837	-0.00733345	0.00850531	-0.00344947	-0.0061587	-6.40242e-05	-0.002722	-0.00435179	-2.86289e-06	-4.90975e-05	-0.0047057	0.00256784	2.60994e-05	-0.0010982	8.14907e-09	0.00107854	-1.11545e-05	0.00184842	0.000472516	0.0011876	0.000265956
AGTTCGATCACTTTGT.1	-0.0179366	0.00112963	-0.0667012	-0.00151178	0.0196281	0.00300724	0.00118038	0.00301006	-0.000297369	0.00175472	-0.00145783	-0.00443536	-0.00101414	-0.0120984	-0.00757686	-0.0289215	0.00511877	2.06083e-05	0.000134928	-0.000483393	-0.00595298	0.00590623	0.00225586	-0.00544466	0.00403202	3.31588e-05	0.0821529	-0.000370203	-0.00210984	-0.0199423	0.0212704	-0.134604	-0.0130891	-9.1241e-05	-0.00272398	-0.0135235	2.74368e-06	-2.16067e-05	-0.0125817	0.00260627	1.2829e-05	0.00551795	1.07102e-08	0.00210491	1.38069e-06	0.00178093	0.0010262	0.000927351	0.000261467
ATACCGACACAGTACT.1	-0.00939142	-0.00159561	-0.0734311	-0.0070762	0.0159674	0.00325831	0.0011249	-0.00288664	-0.000296814	0.00110514	-0.00124209	-0.00390042	-0.00116205	-0.00875542	-0.00403386	-0.0379712	0.00526777	2.97986e-05	0.000133017	0.00903635	-0.00354399	0.00590585	0.00242203	-0.00568375	0.00403481	1.03489e-05	0.0632671	-0.00033634	-0.00255448	-0.0216739	0.0323836	-0.119229	-0.00942023	-8.47839e-05	-0.00272179	-0.0163831	8.34651e-06	-1.61026e-05	-0.0288835	0.00275566	1.24052e-05	0.00147454	1.13796e-08	0.00251254	2.26172e-06	0.00184947	0.000896946	0.00117476	0.000263084
ATACCTTAGCTTAAGA.1	-0.00710887	-0.00153225	-0.0759127	-0.0287296	0.0158966	0.00308244	0.00116904	0.00115568	-0.000280068	0.00112615	-0.00133867	-0.00351623	-0.00117587	0.0199891	-0.00384034	-0.102768	0.00529156	1.79522e-05	0.000132902	0.0215142	-0.00348652	0.00585333	0.00226767	-0.00580373	0.00406204	4.03309e-06	0.0403913	-0.000329627	-0.00214564	-0.0141616	0.0229651	-0.12821	-0.00635207	-7.06788e-05	-0.00272256	-0.00791955	6.86012e-06	-2.81669e-05	-0.040066	0.00279442	1.33291e-05	-0.00104491	6.40284e-09	0.00213697	-1.18744e-08	0.00189055	0.000668168	0.00118729	0.000265952
ATACTTCGTTTACCTT.1	-0.00356874	-0.00123883	-0.0410594	-0.00148615	0.00386925	0.00291055	0.0010746	0.00527587	-0.000249159	0.00116996	-0.00133735	-0.00361841	-0.00117615	-0.000275683	-0.00367245	-0.0318122	0.00529608	1.44765e-05	0.000133028	0.00372313	-0.00313946	0.00577428	0.00208248	-0.00558484	0.00413136	8.02148e-05	0.0307082	-0.000324389	-0.00108534	-0.0073758	0.00902131	-0.0208549	-0.0060451	-6.41415e-05	-0.00272201	-0.00455545	-1.84402e-07	-4.98742e-05	-0.00614002	0.00257198	2.48291e-05	-0.0010952	8.09086e-09	0.00107505	-1.03756e-05	0.00184727	0.000500247	0.00118761	0.000265881
ATAGACCTCGTAATGC.1	-0.00363116	-0.00124482	-0.0413078	-0.00224845	0.00390088	0.00291064	0.00107619	0.00522999	-0.000249852	0.00116927	-0.00133802	-0.00362549	-0.00117615	0.000321943	-0.00367684	-0.0339096	0.0052961	1.44988e-05	0.000133013	0.00397898	-0.0031366	0.00577594	0.00208522	-0.00558697	0.00412981	7.59326e-05	0.0329445	-0.000324434	-0.00110181	-0.00754498	0.0093462	-0.0273044	-0.00593736	-6.42365e-05	-0.00272203	-0.00465843	6.59376e-07	-4.9511e-05	-0.00655991	0.00257418	2.42591e-05	-0.00109337	8.11997e-09	0.00109057	-9.75165e-06	0.00184727	0.000505149	0.0011876	0.000265919
ATAGGCTTCGCCGATG.1	-0.00467567	-0.00136329	-0.0457944	-0.0109645	0.0143944	0.00298082	0.00110407	0.0028739	-0.000256207	0.00116459	-0.0013338	-0.00359328	-0.00117559	0.00720616	-0.00370558	-0.0788759	0.00529525	1.45026e-05	0.000132967	0.00774305	-0.00318995	0.00579122	0.00210095	-0.00572333	0.00411486	3.51239e-05	0.0441052	-0.000324612	-0.00136255	-0.00930761	0.0134041	-0.055223	-0.00753297	-6.49221e-05	-0.002722	-0.00576136	-2.71574e-06	-4.31892e-05	-0.0217701	0.00271057	2.06847e-05	-0.00119115	7.21775e-09	0.00134301	-2.05101e-06	0.00185224	0.000583753	0.00118722	0.00026596
ATATCCTTCGCCAATA.1	-0.0139541	0.000917892	-0.0725871	-0.00239462	0.0236325	0.00309536	0.00122025	-0.00120232	-0.000297306	0.00138465	-0.00142539	-0.00405363	-0.00111605	-0.0138005	-0.0051417	-0.0214095	0.005193	3.05567e-05	0.000133727	-0.00406986	-0.00598636	0.00591487	0.0023469	-0.00548245	0.00403344	2.20854e-05	0.103987	-0.000352969	-0.0022562	-0.0220735	0.0288225	-0.12743	-0.0143104	-9.46331e-05	-0.00272502	-0.0245942	7.00448e-06	-2.3935e-05	-0.02517	0.00262303	1.27777e-05	0.00348175	1.32713e-08	0.00226653	3.59328e-06	0.00182	0.00175948	0.00111192	0.000253461
ATCACAGAGTCTGCAT.1	-0.00712341	-0.000680403	-0.0990294	0.000502268	0.00606072	0.00290909	0.00110483	0.00620702	-0.00027435	0.00145364	-0.00134242	-0.0041848	-0.00116614	-0.00552166	-0.00445431	-0.0292531	0.00528256	1.45845e-05	0.000133917	0.000323284	-0.00373148	0.00581871	0.00209646	-0.00553521	0.00409394	0.000103384	0.082795	-0.000341466	-0.00147586	-0.0111774	0.0101287	-0.0597244	-0.00880229	-7.08086e-05	-0.00272212	-0.00813386	5.77979e-06	-4.38765e-05	-0.00520483	0.00256212	2.11131e-05	-0.000483021	8.14907e-09	0.00147628	-1.96369e-06	0.00185037	0.000459969	0.00115741	0.000264702
ATCACGAAGCCAAGCA.1	-0.00370075	-0.00124515	-0.0468404	-0.000848192	0.00387664	0.00290689	0.00107858	0.00466849	-0.000249865	0.00117077	-0.00133383	-0.00360515	-0.00117616	-0.00107602	-0.00366628	-0.0362484	0.00529644	1.4443e-05	0.000133019	0.00289854	-0.00313272	0.00577149	0.00209337	-0.00558892	0.00413419	7.64485e-05	0.0358569	-0.000324314	-0.00109215	-0.00752674	0.0094971	-0.0103021	-0.00599412	-6.4231e-05	-0.002722	-0.00430384	-1.49198e-06	-5.02318e-05	-0.0053634	0.00257579	2.54475e-05	-0.00108853	8.14907e-09	0.00108404	-8.93604e-06	0.00184827	0.000478983	0.0011876	0.000265963
ATCACGACAGCGGTTC.1	-0.0104804	-0.00194824	-0.0478412	-0.0322861	0.0012869	0.00353172	0.00127211	0.00237904	-0.000292595	0.00104226	-0.00135913	-0.00323233	-0.00117523	0.0162564	-0.0042629	-0.0762181	0.00528314	2.62372e-05	0.000132928	0.0515089	-0.00389681	0.0058842	0.00255093	-0.00595003	0.00403333	-3.59733e-05	0.00903027	-0.000334857	-0.00289696	-0.0210605	0.0346886	-0.145506	-0.00820311	-7.81461e-05	-0.00272205	-0.0169435	1.82218e-05	-1.54506e-05	-0.0540066	0.00295375	1.18008e-05	-0.00147365	-4.93601e-08	0.00287262	9.37143e-07	0.00190485	0.00138578	0.00119061	0.000265939
ATCACTTCATGACTTG.1	-0.00461127	-0.00131404	-0.0694544	-0.0114273	0.0102084	0.00294067	0.00109367	0.00305266	-0.000262122	0.00115821	-0.00133446	-0.00368808	-0.00117547	0.00665366	-0.00375383	-0.0827712	0.00529465	1.51806e-05	0.000132961	0.00752046	-0.00319855	0.00579904	0.00213363	-0.00568795	0.00411062	3.26745e-05	0.0617258	-0.000325268	-0.00146964	-0.0104311	0.0136074	-0.0776789	-0.00618752	-6.62804e-05	-0.00272201	-0.00518969	3.04542e-06	-3.86015e-05	-0.0168932	0.00267653	1.9487e-05	-0.000907183	8.03266e-09	0.00145302	-1.407e-06	0.00185067	0.000502616	0.00118706	0.000265963
ATCACTTGTAGGTCAG.1	-0.00559792	-0.00130992	-0.0910917	-0.019772	0.0152504	0.00293589	0.00108641	0.00462638	-0.000266545	0.00115576	-0.00133561	-0.00378317	-0.00117563	0.0133003	-0.00377128	-0.0740484	0.00529459	1.47074e-05	0.000133272	0.00507035	-0.00322524	0.0058197	0.00217203	-0.00577113	0.00408985	2.4044e-05	0.0740157	-0.000325261	-0.0016732	-0.0122323	0.0147225	-0.0890806	-0.00629819	-6.68308e-05	-0.002722	-0.00563809	-8.04663e-07	-3.57851e-05	-0.0202753	0.00276228	1.87438e-05	-0.000478327	8.14907e-09	0.00165345	-4.14439e-08	0.00184656	0.000522181	0.00118742	0.00026596
ATCACTTGTCGAAACG.1	-0.00424638	-0.00127987	-0.0791727	-0.00526848	0.00718245	0.00296093	0.00106593	0.00341766	-0.000267537	0.00116459	-0.00128719	-0.00380701	-0.00117577	0.000667524	-0.00373157	-0.0700953	0.00529503	1.53519e-05	0.000133151	0.00475795	-0.0031899	0.00580329	0.00211653	-0.00561941	0.00410333	6.72918e-05	0.0560516	-0.000325052	-0.00145607	-0.01042	0.011099	-0.0346527	-0.00658975	-6.59789e-05	-0.00272009	-0.00499186	-1.72481e-06	-3.66569e-05	-0.00724947	0.00261509	2.19233e-05	-0.000969477	8.14907e-09	0.00144579	-1.67917e-06	0.00184125	0.000447631	0.00118607	0.000265956
ATCACTTTCGCACTCT.1	-0.0208505	0.00284146	-0.0185712	0.000170978	0.0162564	0.00295435	0.00114879	0.00986681	-0.000297687	0.00589644	-0.00142242	-0.00602486	-0.00117397	-0.00948246	-0.0238029	-0.0268388	0.00529115	1.7643e-05	0.000134842	-0.00437251	-0.00741527	0.00592161	0.00319971	-0.00531229	0.00403263	4.07547e-05	0.0800597	-0.000398723	-0.00188356	-0.0172643	0.019228	-0.2156	-0.00888112	-9.96408e-05	-0.00272436	-0.0114766	1.84067e-05	-2.422e-05	-0.0205973	0.0025828	1.20655e-05	0.00319096	9.57516e-09	0.00190449	3.60887e-08	0.00184978	0.000638291	0.000699813	0.0002646
ATCAGGTCACACCTAA.1	-0.00626281	-0.00142688	-0.103537	-0.00940068	0.0151849	0.00305928	0.00107984	-0.000185604	-0.000281701	0.00114429	-0.00127607	-0.00389513	-0.001162	0.000350924	-0.00386335	-0.0469852	0.00528085	2.03177e-05	0.000133093	0.00394831	-0.00328352	0.00584944	0.002153	-0.00565676	0.00406217	3.58112e-05	0.0969052	-0.000329075	-0.00186507	-0.014944	0.020667	-0.0814662	-0.00943588	-7.11762e-05	-0.00272073	-0.00939825	3.7849e-06	-2.8342e-05	-0.0198967	0.00265422	1.73673e-05	2.85413e-05	8.61473e-09	0.00186363	1.21072e-08	0.00184525	0.000608131	0.00117895	0.000265663
ATCAGGTCACCCAACG.1	-0.00845167	-0.00167623	-0.0491815	-0.014031	0.0187163	0.00315531	0.00116505	0.00409581	-0.000296928	0.00111526	-0.00136375	-0.00368	-0.00117559	0.00135304	-0.004038	-0.058956	0.00528762	2.38679e-05	0.000132831	0.0244031	-0.00353757	0.00587492	0.00301479	-0.00609176	0.00403089	5.55627e-06	-0.000893459	-0.000328077	-0.00266806	-0.0182714	0.0254481	-0.121872	-0.00522161	-7.25474e-05	-0.002722	-0.0118427	9.22754e-06	-2.18181e-05	-0.0463698	0.00309616	1.21747e-05	-0.00164951	6.98492e-09	0.00266103	3.51574e-08	0.00201477	0.000747859	0.0011996	0.000265954
ATCAGGTTCTAAGCCA.1	-0.00902326	-0.000422712	-0.0972717	0.000159372	0.00885904	0.00291236	0.00111327	0.00696234	-0.00027686	0.00145327	-0.00136654	-0.00426728	-0.00116942	-0.00661149	-0.00489422	-0.0273299	0.0052883	1.45435e-05	0.000134017	-0.00135149	-0.004024	0.00583792	0.00209078	-0.00552057	0.00407662	8.80826e-05	0.0950752	-0.000344848	-0.00165835	-0.0126898	0.0113773	-0.0795957	-0.00844705	-7.33014e-05	-0.002722	-0.00875288	5.88154e-06	-3.96091e-05	-0.00811118	0.0025628	1.87214e-05	-0.000216905	8.17818e-09	0.00165842	-6.7777e-07	0.00185193	0.000454888	0.00113895	0.000265403
ATCATTCCAGTAACCT.1	-0.00504208	-0.0011192	-0.102512	0.00104074	0.00481343	0.00290611	0.00108912	0.00499801	-0.000269939	0.00152871	-0.00134081	-0.00424904	-0.00115013	-0.00422494	-0.00430009	-0.0358986	0.00526753	1.45249e-05	0.000133401	0.00195164	-0.0032752	0.00579416	0.00216489	-0.00554141	0.00411703	0.000115121	0.062141	-0.000337025	-0.00131814	-0.00941184	0.00946349	-0.0568678	-0.00755165	-6.81062e-05	-0.00272285	-0.00574678	2.2538e-07	-4.6663e-05	-0.00405979	0.00255781	2.38977e-05	-0.000714395	8.14907e-09	0.00131946	-7.68108e-06	0.00185587	0.000426888	0.00117366	0.000264801
ATCCACCAGGGTCACA.1	-0.00328096	-0.00126758	-0.0278726	-0.00021324	-0.00129045	0.00290462	0.00107834	0.00593303	-0.000247727	0.00117455	-0.00133118	-0.00357731	-0.00117582	-0.000415288	-0.00366379	-0.0215103	0.00529645	1.45473e-05	0.000133084	0.00281859	-0.00310277	0.00576493	0.00208098	-0.00556861	0.0041401	0.000128102	-0.000679661	-0.000324285	-0.0010072	-0.00621124	0.00679414	0.0206758	-0.00708669	-6.38557e-05	-0.002722	-0.0027626	-3.87058e-06	-5.16456e-05	0.0018307	0.00255596	2.87481e-05	-0.0010886	8.14907e-09	0.001006	-1.44548e-05	0.00185719	0.000413701	0.00118887	0.000265962
ATCCACCCATGTGTCA.1	-0.0108641	-0.000285659	-0.0842916	-0.00356726	0.0249253	0.00307869	0.00124078	-0.00382826	-0.000297021	0.0011953	-0.00129501	-0.00377202	-0.00115434	-0.0131107	-0.00441333	-0.0287219	0.00521139	3.00426e-05	0.000133369	-0.00628061	-0.00484203	0.00592808	0.00218218	-0.00553913	0.00403583	2.51364e-05	0.103575	-0.000359071	-0.00239004	-0.0222774	0.0326162	-0.122993	-0.0133809	-9.87614e-05	-0.00272251	-0.0226991	6.7139e-06	-2.09101e-05	-0.0265172	0.00265545	1.34371e-05	0.0028054	1.234e-08	0.0023738	3.90061e-06	0.0018333	0.00143014	0.00115595	0.000249755
ATCCACCCATTGTAGC.1	-0.00429373	-0.00125754	-0.0948389	-0.00140086	0.00334484	0.00300617	0.00107604	0.00345876	-0.000266643	0.00116985	-0.00123453	-0.00388024	-0.00117548	-0.00273874	-0.00376086	-0.0462548	0.00529607	1.63726e-05	0.000133272	0.00294412	-0.00323574	0.00580524	0.00211806	-0.00557876	0.00410365	9.76101e-05	0.0590459	-0.000325	-0.00138834	-0.0100176	0.0100045	-0.0138173	-0.00680393	-6.6628e-05	-0.00271996	-0.0059067	-2.66358e-07	-3.77502e-05	-0.00244826	0.00257708	2.44938e-05	-0.000668846	8.3819e-09	0.00138825	-3.14647e-06	0.00184079	0.000459969	0.00118549	0.000265904
ATCCCTGCAGAACTTC.1	-0.00402827	-0.00115875	-0.0633446	0.000802656	5.92135e-05	0.00290613	0.00108528	0.00516869	-0.000255958	0.00118604	-0.00133246	-0.00371882	-0.00117541	-0.00231535	-0.00375963	-0.0323579	0.00529542	1.45808e-05	0.000133611	0.00253666	-0.00321375	0.00578329	0.00208683	-0.00555962	0.00412558	0.000125429	0.0278277	-0.000326319	-0.00115289	-0.00722619	0.0077958	0.0126686	-0.00697596	-6.58964e-05	-0.00272192	-0.00359887	-2.58721e-06	-5.00008e-05	0.00137189	0.00255804	2.73027e-05	-0.000947002	8.14907e-09	0.00115418	-9.93768e-06	0.00185536	0.000422463	0.00118183	0.000265777
ATCCGTCAGAGCTGCA.1	-0.00326203	-0.0012689	-0.0262596	0.000214748	-0.000945214	0.00290655	0.00107242	0.00589427	-0.0002478	0.00117455	-0.00133153	-0.00358108	-0.00117616	-0.000811767	-0.00366378	-0.0191904	0.00529686	1.45137e-05	0.000133084	0.00247411	-0.00309014	0.00576456	0.00208337	-0.00557072	0.00414042	0.000131909	0.000364464	-0.000324277	-0.0010039	-0.00618848	0.00677949	0.0204706	-0.00704794	-6.38219e-05	-0.002722	-0.0028169	-4.06802e-06	-5.15897e-05	0.00156897	0.00255753	2.87965e-05	-0.00108682	8.14907e-09	0.00100422	-1.43694e-05	0.0018568	0.000414014	0.00118826	0.000265956
ATCCGTCCATTAGGCT.1	-0.00398926	-0.00128778	-0.036073	-0.0109654	0.00499002	0.00293394	0.00109088	0.00627935	-0.000250962	0.00116544	-0.00134362	-0.00360674	-0.00117611	0.00814711	-0.00371441	-0.0469914	0.00529609	1.49496e-05	0.00013298	0.00558911	-0.00314985	0.00578602	0.00214306	-0.00560057	0.00412119	5.18523e-05	0.0409263	-0.00032491	-0.00119633	-0.00840045	0.0108873	-0.0524128	-0.00563299	-6.49824e-05	-0.00272204	-0.005371	3.33972e-06	-4.7842e-05	-0.0108759	0.00258759	2.14502e-05	-0.0010798	8.11997e-09	0.00118151	-7.78073e-06	0.0018497	0.000549048	0.00118749	0.000265962
ATCCTATGTCAGTCTA.1	-0.00383377	-0.00127504	-0.0469761	-0.00497741	0.00388907	0.00290985	0.00109759	0.00379295	-0.000252227	0.0011698	-0.00133446	-0.00358848	-0.00117576	0.00298911	-0.00367468	-0.0651535	0.0052958	1.44504e-05	0.000133006	0.00412154	-0.00314422	0.00577621	0.00209715	-0.00560562	0.00412878	6.70198e-05	0.0308727	-0.000324344	-0.00113502	-0.00755767	0.00985222	-0.0198098	-0.00702666	-6.42603e-05	-0.002722	-0.00369799	-2.90386e-06	-4.87193e-05	-0.00610375	0.00259236	2.42256e-05	-0.0010681	8.11997e-09	0.00112395	-5.88293e-06	0.00185166	0.000468805	0.00118759	0.000265963
ATCCTATTCGCCTCTA.1	-0.0035329	-0.00125851	-0.039842	-0.00280522	0.00429737	0.00291613	0.00107999	0.00571103	-0.000248893	0.00117011	-0.0013351	-0.00360248	-0.00117567	0.000921654	-0.00367658	-0.0349598	0.00529532	1.45137e-05	0.000133019	0.00377551	-0.00313488	0.00577662	0.00208321	-0.00558746	0.00412958	7.57892e-05	0.0309771	-0.000324456	-0.00109623	-0.0074773	0.00909059	-0.022613	-0.00598129	-6.42142e-05	-0.00272204	-0.00467253	2.3786e-06	-4.87026e-05	-0.00697795	0.00257466	2.4721e-05	-0.00109611	8.11997e-09	0.00108621	-1.08562e-05	0.00184862	0.000514463	0.00118759	0.000265792
ATCGCCTTCTCCGAGG.1	-0.00449753	-0.00133111	-0.0696572	-0.00654113	0.00628616	0.0029725	0.0010898	0.00431395	-0.00026487	0.00116149	-0.00132017	-0.00369693	-0.00117579	0.00199312	-0.00375375	-0.0821662	0.00529482	1.50762e-05	0.00013322	0.00908693	-0.00320218	0.00580673	0.00219871	-0.00567584	0.00410371	4.26676e-05	0.0490514	-0.000325395	-0.00151183	-0.0102307	0.0118247	-0.0522653	-0.00662	-6.66331e-05	-0.00272197	-0.00510556	-1.47708e-06	-3.72604e-05	-0.0127392	0.00266714	2.06754e-05	-0.00101227	8.11997e-09	0.00149989	-1.75321e-06	0.00184943	0.000519961	0.00118639	0.000265962
ATCGGATCAAAGCTCT.1	-0.00515368	-0.000994561	-0.0758138	0.000945807	0.000854474	0.00290588	0.00110534	0.00541045	-0.000262414	0.00119437	-0.00134389	-0.00368904	-0.00117586	-0.00340965	-0.0039164	-0.0356198	0.00529297	1.51843e-05	0.000133684	0.00254535	-0.00339278	0.00579606	0.0021011	-0.00552881	0.00411156	0.000122644	0.0460374	-0.000328405	-0.00125023	-0.00812454	0.00809383	0.00332654	-0.00646751	-6.60216e-05	-0.00272198	-0.00517371	-1.86451e-06	-4.67412e-05	-0.00104854	0.00255711	2.63415e-05	-0.000893723	8.3819e-09	0.00125153	-8.61054e-06	0.00185701	0.000451863	0.00114519	0.000264816
ATCGGCGTCCATTCGC.1	-0.00349169	-0.0012509	-0.0418466	-0.00248506	0.0029647	0.00291008	0.00107531	0.00508519	-0.000249402	0.00117081	-0.00133528	-0.00364082	-0.00117615	0.000877637	-0.00367483	-0.0303309	0.00529644	1.46218e-05	0.000133034	0.00391269	-0.00312647	0.00577232	0.00208638	-0.0055818	0.00413289	7.90227e-05	0.0276663	-0.000324352	-0.00108066	-0.00724624	0.00855544	-0.0125331	-0.00620879	-6.40911e-05	-0.00272201	-0.00420682	-2.35997e-06	-4.94905e-05	-0.00505462	0.00256879	2.56225e-05	-0.00108698	8.14907e-09	0.0010722	-1.08301e-05	0.00185174	0.000481516	0.00118759	0.000265956
ATCGGCGTCCTCAGGG.1	-0.00361768	-0.00127405	-0.0519234	-0.00264525	0.00384155	0.00291261	0.00107832	0.00442616	-0.000250114	0.00116993	-0.00133604	-0.00362844	-0.00117615	0.00075393	-0.00367591	-0.0416192	0.00529631	1.44914e-05	0.000133019	0.00395733	-0.0031172	0.00577226	0.00211671	-0.00558811	0.00413323	7.14157e-05	0.0347345	-0.000324441	-0.00111026	-0.00751446	0.00933033	-0.018519	-0.00618427	-6.43691e-05	-0.002722	-0.00403792	-1.34669e-06	-4.9619e-05	-0.00601241	0.00257497	2.4613e-05	-0.00107995	8.14907e-09	0.00109965	-8.08272e-06	0.00185159	0.000451505	0.00118759	0.000265963
ATCGTAGAGGACGGAG.1	-0.00936768	-0.000746687	-0.0789409	0.000491966	0.00812482	0.00291957	0.00111921	0.00725145	-0.000276615	0.00207764	-0.0013825	-0.00466975	-0.00116791	-0.00673302	-0.00453391	-0.0290357	0.00528644	1.45398e-05	0.000134038	-0.00189425	-0.0037043	0.00584475	0.00210333	-0.00550815	0.00407359	9.13926e-05	0.0943755	-0.000350019	-0.0016279	-0.0128843	0.0117304	-0.0981805	-0.00914282	-7.67548e-05	-0.00272265	-0.00851145	7.03521e-06	-3.8825e-05	-0.0050568	0.00256176	1.76746e-05	-0.000132691	8.17818e-09	0.00162923	-2.55182e-07	0.0018516	0.000483125	0.00114124	0.000265419
ATCGTCCGTACAAACA.1	-0.00586116	-0.00137182	-0.0493302	-0.0161842	0.0196268	0.0029809	0.00110786	0.00309539	-0.000259708	0.0011578	-0.00134792	-0.00359785	-0.00117149	0.0110021	-0.0037217	-0.0863154	0.00529043	1.44653e-05	0.000132969	0.0102826	-0.00320814	0.00580333	0.00211833	-0.0057437	0.0041029	2.70605e-05	0.0499343	-0.000324687	-0.00152203	-0.0107299	0.0150204	-0.0739062	-0.00771797	-6.50273e-05	-0.002722	-0.0070751	-1.68383e-06	-4.08348e-05	-0.0298768	0.00273116	1.86097e-05	-0.00125354	7.68341e-09	0.00150095	-6.6217e-07	0.00185104	0.000695825	0.00118707	0.000265962
ATCTCTAGTCTGATCA.1	-0.0177655	0.000994652	-0.0645373	-0.00113422	0.0183081	0.00301556	0.0011836	0.00330651	-0.000297445	0.00182578	-0.00145159	-0.00448992	-0.00102291	-0.012388	-0.00776051	-0.0306049	0.00512499	2.03289e-05	0.000134971	-0.000185345	-0.00584439	0.00590762	0.00228609	-0.00544427	0.00403138	3.35854e-05	0.0804484	-0.000369756	-0.00211747	-0.0199053	0.0213327	-0.134049	-0.0125439	-9.21816e-05	-0.0027247	-0.0138039	2.01724e-06	-2.19587e-05	-0.0123235	0.00260181	1.28001e-05	0.00524801	1.02445e-08	0.00211134	1.16252e-06	0.00179503	0.00106077	0.000967204	0.000260899
ATCTTCACAGTATTCG.1	-0.0260021	0.00155939	-0.0298721	-0.00447898	0.0233179	0.00335562	0.00129939	-0.00030992	-0.000301945	0.00217544	-0.00131756	-0.00408154	-0.00081843	-0.0163601	-0.0109502	-0.0119087	0.00490662	2.2348e-05	0.000137078	-0.00281095	-0.00720467	0.00596123	0.00277182	-0.00525999	0.00401885	1.95396e-05	0.037104	-0.00039841	-0.00287133	-0.0264469	0.0344925	-0.0799384	-0.0184656	-0.000118093	-0.00272555	-0.0229602	1.19172e-05	-1.34101e-05	-0.0119266	0.0027431	1.19931e-05	0.0113219	1.36206e-08	0.0028061	2.49967e-05	0.00177276	0.00213581	0.000755712	0.000256319
ATGACCAGTGCAACAG.1	-0.00539595	-0.0013913	-0.0879413	-0.00955491	0.0109762	0.00301814	0.0010776	0.00301307	-0.000282114	0.00114945	-0.00128003	-0.00401446	-0.00117534	0.00118502	-0.00383201	-0.0579711	0.00529355	1.65999e-05	0.000133224	0.00749498	-0.00322189	0.00583729	0.00211598	-0.0056828	0.00407226	2.95695e-05	0.0717947	-0.000325998	-0.00192838	-0.01439	0.0173425	-0.074384	-0.00661899	-6.90448e-05	-0.00272167	-0.00796816	2.0396e-06	-2.99905e-05	-0.0168822	0.00267936	1.67377e-05	-0.000741903	8.14907e-09	0.00192381	-1.14087e-08	0.00185204	0.000528753	0.00118168	0.000265934
ATGAGGGTCGCTTAAG.1	-0.0177115	0.00218963	-0.0651243	-0.0015706	0.022569	0.00306629	0.00120302	0.00359659	-0.000297539	0.00194864	-0.00117057	-0.0042768	-0.000856173	-0.0160693	-0.0058136	-0.0338	0.00492835	2.79602e-05	0.000133956	-0.0104649	-0.00714589	0.00591106	0.00237026	-0.0053879	0.00403018	2.8627e-05	0.0954409	-0.000368049	-0.00252104	-0.0237088	0.0281003	-0.138909	-0.0170006	-9.85763e-05	-0.00272073	-0.0237064	6.37956e-06	-2.06605e-05	-0.01261	0.00262307	1.28122e-05	0.00463642	1.36206e-08	0.00254075	1.37836e-05	0.00175676	0.00177483	0.00102054	0.000251263
ATGATCGAGGGATCAC.1	-0.0141123	-0.000415392	-0.072236	0.000837935	0.0115011	0.00292611	0.00111754	0.00786744	-0.000284335	0.0046327	-0.00140573	-0.00524085	-0.00117204	-0.00724333	-0.00620529	-0.0348196	0.00529205	1.56201e-05	0.000133963	-0.00372865	-0.00405486	0.00587353	0.0021825	-0.0054384	0.00404933	7.83093e-05	0.0900239	-0.000355607	-0.00173942	-0.0136191	0.0141644	-0.133431	-0.00920088	-8.10284e-05	-0.00272239	-0.01068	5.58048e-06	-3.78042e-05	-0.00841153	0.00255921	1.51955e-05	0.000791297	8.44011e-09	0.00174558	-1.86265e-08	0.0018499	0.000485018	0.00110969	0.000265546
ATGATCGGTGTGGACA.1	-0.00562072	-0.000894759	-0.0952354	0.000975695	0.00421102	0.00290727	0.00109409	0.00600578	-0.00026725	0.00124965	-0.00133945	-0.00405959	-0.00115574	-0.00460324	-0.0041874	-0.0339762	0.00527449	1.46069e-05	0.000133513	0.0013545	-0.00349755	0.00579919	0.00210183	-0.00554758	0.00410999	0.000113562	0.0706716	-0.000335408	-0.00137513	-0.00966371	0.00885032	-0.0379276	-0.00829594	-6.80545e-05	-0.0027221	-0.00663546	3.96557e-06	-4.51934e-05	-0.00411674	0.00256096	2.37711e-05	-0.000829581	8.14907e-09	0.00137662	-4.63589e-06	0.00185375	0.000439733	0.0011654	0.000265285
ATGCCTCTCCTGTAGA.1	-0.00354389	-0.00123501	-0.0556314	0.000421362	-0.000275029	0.00291138	0.00107512	0.00520208	-0.000252797	0.00117403	-0.00132745	-0.00367173	-0.00117609	-0.00175897	-0.00370515	-0.0319586	0.00529663	1.46441e-05	0.000133254	0.00263133	-0.00313897	0.00577535	0.00208193	-0.0055664	0.00413199	0.000124983	0.021245	-0.000324762	-0.00113257	-0.00701464	0.00757842	0.0118189	-0.00712044	-6.52011e-05	-0.00272194	-0.00320169	-2.79397e-06	-5.08726e-05	0.00135151	0.0025574	2.74517e-05	-0.00101654	8.14907e-09	0.00113156	-9.88948e-06	0.00185374	0.000412852	0.00118708	0.000265956
ATGCGATCACTGCATA.1	-0.0112082	-0.000240711	-0.099204	-0.00027234	0.0132171	0.00295566	0.00114906	0.00383113	-0.000286953	0.00160151	-0.00142174	-0.00452491	-0.0011365	-0.0088463	-0.0055427	-0.0499351	0.00525462	1.55121e-05	0.000133926	0.00133895	-0.00438091	0.00585647	0.00219511	-0.00553671	0.00405897	6.22068e-05	0.0902157	-0.000357097	-0.00193073	-0.0155921	0.0153264	-0.111403	-0.0107974	-7.85741e-05	-0.00272367	-0.00705037	2.08244e-06	-2.62596e-05	-0.0146641	0.00258313	1.59591e-05	0.000779076	8.64384e-09	0.00193101	3.72529e-09	0.00184795	0.000508219	0.00108854	0.000265134
ATGGGAGCATAGAATG.1	-0.00333273	-0.0012648	-0.0295942	-0.00157902	-0.00126446	0.00290386	0.00107708	0.0055715	-0.0002484	0.00117402	-0.00132947	-0.00359699	-0.00117608	0.00076188	-0.00366491	-0.0278683	0.00529658	1.45175e-05	0.000133058	0.00302747	-0.00310195	0.00574289	0.00208251	-0.0055702	0.0041386	0.00012425	0.00266148	-0.000324344	-0.00104501	-0.00641882	0.00711027	0.016119	-0.00718957	-6.40001e-05	-0.00269813	-0.00279725	-3.76254e-06	-5.13736e-05	0.00134313	0.00255822	2.8301e-05	-0.00108018	8.14907e-09	0.00104333	-1.32741e-05	0.0018537	0.000412837	0.0011888	0.000265963
ATGGGTTAGCAACAGC.1	-0.00710246	-0.00138869	-0.101824	-0.0364983	0.0199457	0.00298293	0.00111497	0.00175035	-0.000274964	0.00113627	-0.00131326	-0.00353894	-0.00117552	0.0292725	-0.00380703	-0.0967964	0.00529286	1.53482e-05	0.000132984	0.0129677	-0.00337562	0.00584047	0.00226609	-0.00589798	0.00407419	5.72484e-06	0.0431597	-0.000330014	-0.00182636	-0.0127095	0.020346	-0.130572	-0.00689618	-6.95478e-05	-0.00272206	-0.00683168	3.37139e-06	-3.30713e-05	-0.0341113	0.00288316	1.55456e-05	-0.000442393	7.79983e-09	0.00180958	-2.93367e-08	0.00184782	0.000629872	0.00118673	0.000265954
ATGGTTGGTGGGACAT.1	-0.0122695	-6.62245e-05	-0.0712122	0.000959143	0.00995572	0.00293123	0.00110494	0.00663651	-0.000282466	0.0076951	-0.00136728	-0.00520348	-0.00117448	-0.00665557	-0.00765575	-0.0378014	0.00529477	1.51694e-05	0.000134191	-0.00222246	-0.00438598	0.00586893	0.002274	-0.00544371	0.00405469	8.85688e-05	0.0859237	-0.000346927	-0.00156129	-0.0128738	0.0134751	-0.140704	-0.00926939	-7.90019e-05	-0.00272234	-0.00952745	5.59166e-06	-4.00059e-05	-0.00992999	0.00255891	1.5365e-05	0.00124026	8.44011e-09	0.00156219	-4.34928e-07	0.00185063	0.000454992	0.00109854	0.000265619
ATGGTTGTCGAACGGA.1	-0.0218174	-0.00320512	-0.0303806	-0.0474493	-0.00398055	0.00528887	0.00143474	0.0112023	-0.000297293	0.000843473	-0.00100121	-0.00317185	-0.00116896	0.0195436	-0.00469893	-0.0491133	0.00525149	3.2004e-05	0.000132618	0.0646955	-0.00474937	0.00595279	0.00581821	-0.00637302	0.00398297	-0.000463858	-0.0335768	-0.000350384	-0.00477878	-0.0322958	0.0577535	-0.166591	-0.00736205	-0.000102066	-0.00272114	-0.0463999	3.93139e-05	5.68014e-05	-0.0774573	0.00346044	-3.58485e-05	-0.00254685	-5.62286e-07	0.00431374	2.89294e-05	0.00184697	0.00438417	0.00118658	0.000265405
ATGTCCCCAAACTCTG.1	-0.0034414	-0.00126353	-0.0491399	-0.00119418	-0.000553349	0.00291433	0.0010679	0.00422862	-0.000258436	0.00117225	-0.00132924	-0.00372551	-0.00117614	-0.000915919	-0.00367937	-0.0286275	0.00529648	1.47261e-05	0.000132957	0.00398508	-0.00311243	0.00577801	0.00208057	-0.00558469	0.00412834	0.000104798	0.0392271	-0.000324523	-0.00116061	-0.00783316	0.00885905	0.00162712	-0.0071615	-6.46265e-05	-0.00272174	-0.00329342	-3.08454e-06	-4.71659e-05	-0.000203639	0.00257334	2.67886e-05	-0.00104059	8.14907e-09	0.00115398	-8.53557e-06	0.00184213	0.000425741	0.0011875	0.000265958
ATGTCCCCACCAATTG.1	-0.00536592	-0.00111017	-0.105258	0.00109221	0.00511414	0.0029078	0.00109121	0.00435024	-0.000271749	0.0018265	-0.00134157	-0.00452936	-0.00113566	-0.00414393	-0.00462673	-0.0392851	0.00525251	1.44616e-05	0.000133559	0.00229186	-0.00329111	0.00579685	0.00223794	-0.00553834	0.00411503	0.000112599	0.0652732	-0.000337442	-0.00131737	-0.00955915	0.0102527	-0.0733799	-0.00795607	-6.81436e-05	-0.00272341	-0.00591555	-1.02259e-06	-4.73689e-05	-0.00443515	0.00255701	2.25678e-05	-0.000563432	8.14907e-09	0.00131778	-8.47969e-06	0.00185486	0.000427499	0.00117219	0.000264592
ATTACTCGTAGCACGA.1	-0.0159549	0.000712622	-0.0528518	0.00102773	0.0121756	0.00294274	0.00112455	0.00618552	-0.00028905	0.00433505	-0.00136299	-0.00576396	-0.00117104	-0.00787959	-0.00934575	-0.0464199	0.00529023	1.65105e-05	0.000134481	-0.000739641	-0.00523185	0.00589658	0.00269196	-0.00542018	0.00403957	5.8163e-05	0.0799442	-0.000372557	-0.0016692	-0.0145885	0.0161217	-0.161934	-0.00887376	-8.94754e-05	-0.00272265	-0.00942618	3.17954e-06	-3.54704e-05	-0.0159377	0.00256385	1.3045e-05	0.00198211	8.64384e-09	0.00166655	-3.21306e-08	0.00184621	0.000533611	0.00100346	0.000265442
ATTATCCCATATTCGG.1	-0.011196	-0.000724615	-0.0721559	0.00103241	0.00805284	0.00292888	0.00111396	0.00780925	-0.000276474	0.00298912	-0.00138774	-0.00496373	-0.00117067	-0.00694124	-0.00492427	-0.0313131	0.0052896	1.46478e-05	0.000133997	-0.00233671	-0.00372969	0.00585569	0.00210867	-0.00546786	0.00406409	9.30876e-05	0.0897196	-0.000349915	-0.00168698	-0.0128475	0.0123758	-0.109972	-0.00901022	-7.84013e-05	-0.00272233	-0.00962374	5.89341e-06	-3.88417e-05	-0.00468162	0.0025591	1.69333e-05	-4.66015e-05	8.17818e-09	0.00168993	-1.09663e-07	0.00185119	0.000477001	0.00113612	0.000265419
ATTCACTAGGCCCGTT.1	-0.0136069	0.000837388	-0.0882481	1.86428e-05	0.0178735	0.00296012	0.00113599	0.00358148	-0.000294731	0.00143894	-0.00144879	-0.00439125	-0.00114771	-0.0117882	-0.00603631	-0.0329001	0.00526629	1.62013e-05	0.000134366	-0.000327535	-0.00552351	0.0058821	0.00234559	-0.00550802	0.00404274	4.4778e-05	0.105212	-0.000360986	-0.00203689	-0.0181146	0.0184075	-0.144258	-0.0128787	-8.59587e-05	-0.00272203	-0.0131436	5.68479e-06	-2.69674e-05	-0.0206958	0.00259989	1.31708e-05	0.00212401	8.84756e-09	0.00204718	1.0035e-07	0.00183915	0.000749722	0.00105236	0.000264825
ATTCACTCACCCTTGT.1	-0.00645696	-0.00135645	-0.101311	-0.00584588	0.0130575	0.00301833	0.00108828	0.000672407	-0.000280642	0.0011504	-0.00130151	-0.00391433	-0.00115615	-0.00232065	-0.00386251	-0.0489543	0.00527534	2.25902e-05	0.000132974	0.00260269	-0.00329646	0.00584633	0.00216348	-0.00563495	0.00406733	4.61638e-05	0.0998737	-0.000330439	-0.00177533	-0.0140695	0.0185328	-0.0664675	-0.00921006	-7.24235e-05	-0.00272151	-0.00863534	1.79745e-06	-3.12421e-05	-0.0164132	0.00263521	1.86078e-05	-0.000252146	8.84756e-09	0.00177451	4.42378e-09	0.0018452	0.000594527	0.00117673	0.000265589
ATTCAGGTCAGAATAG.1	-0.0071658	-0.000826524	-0.0950194	0.000436097	0.00690371	0.0029096	0.001103	0.00617962	-0.000273906	0.00127535	-0.00134527	-0.00408854	-0.00116244	-0.00605761	-0.00422748	-0.0292579	0.00528008	1.46367e-05	0.000133742	8.05585e-05	-0.00359393	0.00582174	0.00209095	-0.00553936	0.00409113	0.000100147	0.0876786	-0.000339007	-0.00151952	-0.0116821	0.0102471	-0.0553766	-0.00899448	-7.08391e-05	-0.00272204	-0.00868741	5.70156e-06	-4.35468e-05	-0.00601432	0.00256474	2.09566e-05	-0.000607531	8.14907e-09	0.00151987	-1.27102e-06	0.00185027	0.000476584	0.00116043	0.000265066
ATTCTACAGACATACA.1	-0.0298256	-0.00341469	0.0335155	-0.0282956	-0.0536076	0.00540245	0.00120451	0.0282214	-0.000732291	0.000740886	-0.000582346	-0.00307638	-0.00112351	-0.0113281	-0.00927063	0.000226514	0.00519935	0.000115052	0.000132384	0.0681209	-0.00537645	0.00644433	0.0124079	-0.00645183	0.00336306	-0.000553507	-0.173896	-0.000363065	-0.00652472	-0.0436725	0.0693537	0.166572	-0.0121174	-0.000154609	-0.00258464	-0.0504396	4.19356e-05	0.00027498	-0.0184474	0.00394917	-0.000149697	-0.00126103	-5.16884e-08	0.00501541	0.000136428	0.00181618	0.00384866	0.00116384	0.000264229
ATTCTACCAGGTTACT.1	-0.00768955	-0.00132735	-0.106947	-0.0031552	0.0166024	0.00305636	0.0011066	0.00130818	-0.00028841	0.00114407	-0.00126982	-0.00399142	-0.00114455	-0.00685409	-0.00399692	-0.0395847	0.00526082	2.51755e-05	0.000133157	0.000117954	-0.00341325	0.00586671	0.00235447	-0.0055825	0.00405447	4.66909e-05	0.100852	-0.000334671	-0.00192719	-0.0159893	0.0199534	-0.0851234	-0.010318	-7.65133e-05	-0.00272187	-0.0109457	5.42589e-06	-2.91541e-05	-0.0180326	0.00259988	1.6775e-05	0.000639379	9.54606e-09	0.00192484	8.44011e-09	0.00184184	0.000692904	0.00117163	0.00026449
ATTCTACCATGAAGGC.1	-0.00334162	-0.00123039	-0.0408574	-0.000585578	0.00191539	0.00290964	0.00107404	0.00569768	-0.000248862	0.0011728	-0.00133479	-0.00362381	-0.00117617	-0.000600841	-0.00367651	-0.0230543	0.00529673	1.44802e-05	0.000133047	0.00284426	-0.0031359	0.00576791	0.0020876	-0.00557393	0.00413703	0.000107555	0.0184581	-0.000324307	-0.00105327	-0.0068151	0.00738981	0.00734228	-0.00654763	-6.39063e-05	-0.00272203	-0.00361504	-3.91342e-06	-4.85946e-05	-0.00248343	0.00256091	2.75373e-05	-0.00108491	8.14907e-09	0.0010483	-1.32555e-05	0.00185434	0.000454634	0.0011876	0.000265963
ATTCTACGTGTCTAAC.1	-0.00389346	-0.00127899	-0.048653	-0.00551774	0.00623106	0.00290818	0.00109337	0.00254685	-0.000253408	0.00116736	-0.00133736	-0.00364327	-0.00117604	0.00273061	-0.0036813	-0.0717712	0.00529568	1.47522e-05	0.000132965	0.00511062	-0.00314864	0.00578141	0.0020839	-0.00563704	0.00412455	5.98151e-05	0.0420374	-0.000324478	-0.00122451	-0.00840954	0.0115275	-0.0366167	-0.00689889	-6.46102e-05	-0.002722	-0.00401184	-2.39536e-06	-4.46551e-05	-0.00968674	0.00262409	2.29217e-05	-0.00106939	8.03266e-09	0.00121008	-3.20817e-06	0.00185073	0.00045684	0.00118753	0.000265963
ATTGGGTTCGACATAC.1	-0.00363072	-0.00128406	-0.0447861	-0.00384143	0.00532931	0.00292647	0.00108523	0.00554276	-0.000249227	0.00116948	-0.00132561	-0.00357663	-0.00117614	0.00157599	-0.0036828	-0.0406951	0.00529593	1.45696e-05	0.000132995	0.00394393	-0.00312457	0.00578323	0.00208674	-0.00559059	0.00412417	7.01491e-05	0.034508	-0.000324642	-0.00111678	-0.00782859	0.00982876	-0.0325306	-0.00586445	-6.44774e-05	-0.00272233	-0.00458717	5.73508e-06	-4.78625e-05	-0.00808385	0.00257736	2.36146e-05	-0.00109782	8.14907e-09	0.00110613	-9.74978e-06	0.0018466	0.000517026	0.00118756	0.000265824
ATTGTTCCAAGTGCAG.1	-0.0252252	0.00129524	-0.0287156	-0.00179171	0.0238552	0.00293716	0.00114282	0.00707494	-0.000297455	0.00939928	-0.00132148	-0.00550504	-0.00117382	-0.00929546	-0.0110775	-0.0245654	0.0052856	1.57356e-05	0.000134952	-0.008188	-0.00581049	0.00589788	0.00230492	-0.00532389	0.00403356	5.16605e-05	0.105344	-0.000390349	-0.00193087	-0.0185093	0.0210206	-0.187869	-0.0101811	-9.25462e-05	-0.00272317	-0.018483	7.79331e-06	-2.384e-05	-0.0211175	0.00259152	1.22506e-05	0.00218839	9.19681e-09	0.00196403	5.57862e-07	0.00185077	0.000715122	0.000868662	0.00026314
ATTGTTCTCAATGCAC.1	-0.00720762	-0.00148048	-0.0850541	-0.0333627	0.0172545	0.0030452	0.00116141	0.00146417	-0.000277104	0.00112787	-0.00133442	-0.00348106	-0.00117576	0.0254732	-0.00383204	-0.107476	0.00529215	1.6138e-05	0.000132971	0.0204657	-0.0034689	0.00584816	0.00227778	-0.00586419	0.00406785	2.98605e-06	0.0386371	-0.000330111	-0.00201937	-0.0132811	0.0220475	-0.131628	-0.00660621	-7.01705e-05	-0.00272242	-0.00733843	6.46338e-06	-3.05101e-05	-0.0397837	0.00285199	1.37817e-05	-0.000877816	6.63567e-09	0.00200705	-4.65661e-08	0.00187477	0.000647426	0.00118663	0.000265947
ATTTACCAGGTTATAG.1	-0.00552449	-0.00132013	-0.0540207	-0.0161609	0.0184732	0.0029307	0.00111427	0.00194333	-0.000259924	0.00115886	-0.00134745	-0.00362756	-0.00117264	0.0109469	-0.00371457	-0.0812585	0.00529175	1.44579e-05	0.000132941	0.0105028	-0.00320498	0.00580031	0.00212109	-0.00570855	0.00410562	3.11173e-05	0.0555872	-0.000324605	-0.00153006	-0.0107866	0.0156284	-0.0709879	-0.00766552	-6.49007e-05	-0.002722	-0.00723234	-1.85892e-06	-4.21163e-05	-0.0283718	0.0026959	1.87941e-05	-0.00122835	7.567e-09	0.00150938	-6.48433e-07	0.00184862	0.00061503	0.0011868	0.000265962
ATTTACCCAGGCCTGT.1	-0.00475934	-0.00130768	-0.0760889	-0.0133672	0.0113679	0.00293246	0.00109451	0.00234656	-0.000265568	0.00115785	-0.00133343	-0.0037293	-0.00117547	0.00807095	-0.00375723	-0.0854292	0.00529449	1.50539e-05	0.000132943	0.00580548	-0.00320647	0.00580318	0.00211804	-0.00569147	0.00410586	3.07821e-05	0.0727967	-0.000325141	-0.00155919	-0.0109899	0.0144274	-0.0790884	-0.0068062	-6.64333e-05	-0.002722	-0.0052641	2.2538e-06	-3.65395e-05	-0.0164039	0.00268039	1.93939e-05	-0.00080907	8.14907e-09	0.00154257	-6.68457e-07	0.00184979	0.000491694	0.00118723	0.000265962
ATTTACCTCACCCTTG.1	-0.00633419	-0.00136384	-0.0598315	-0.0207317	0.0201074	0.00297147	0.00110149	0.00409409	-0.000261066	0.00115551	-0.00134754	-0.0035824	-0.00117221	0.0154061	-0.00373683	-0.0875462	0.00529113	1.44541e-05	0.000133047	0.00999466	-0.00321908	0.00581067	0.00212482	-0.00579308	0.00409725	2.20696e-05	0.0484573	-0.000324978	-0.001518	-0.0108558	0.0146716	-0.0888264	-0.00797017	-6.55126e-05	-0.002722	-0.00658724	-1.6354e-06	-3.93968e-05	-0.0309581	0.00278065	1.82446e-05	-0.00113678	7.91624e-09	0.00149577	-4.92437e-07	0.00184958	0.000664353	0.00118723	0.000265954
ATTTCACTCATTTCGT.1	-0.0032884	-0.00126718	-0.0289194	-0.000680591	-0.00117419	0.00290362	0.00107874	0.00582821	-0.000247848	0.00117461	-0.00133097	-0.00358815	-0.00117602	3.94881e-05	-0.00366519	-0.0209043	0.00529665	1.44914e-05	0.000133088	0.0028224	-0.003104	0.00576561	0.00207976	-0.00556752	0.00413954	0.000128428	-0.000663474	-0.000324314	-0.00102067	-0.00623595	0.00685227	0.0201895	-0.00708263	-6.38997e-05	-0.00272194	-0.00275657	-3.84822e-06	-5.16251e-05	0.00173771	0.00255564	2.87369e-05	-0.00108707	8.14907e-09	0.00101964	-1.42425e-05	0.00185723	0.00041233	0.00118881	0.000265962
ATTTCTGCACAGCATT.1	-0.00434586	-0.00132004	-0.0826595	-0.00403914	0.00647757	0.00300277	0.00108169	0.00304833	-0.000265331	0.00116115	-0.00129064	-0.0037999	-0.00117557	-0.000719039	-0.00380964	-0.05521	0.00529553	1.73971e-05	0.000132959	0.00469235	-0.00318498	0.00579929	0.00217853	-0.00564699	0.00411133	6.47474e-05	0.0678153	-0.000325544	-0.00142403	-0.0105413	0.0114008	-0.055491	-0.00730621	-6.75371e-05	-0.002722	-0.00492552	1.64844e-06	-3.27267e-05	-0.00718141	0.00263964	2.1426e-05	-0.000419054	8.3819e-09	0.00141677	-2.74787e-06	0.00182989	0.000451401	0.00118725	0.000265956
CAAAGAACATTCTCCG.1	-0.00711451	-0.00140788	-0.0990324	-0.0342279	0.0209205	0.00300127	0.00111349	0.00152312	-0.000275981	0.00113561	-0.00131638	-0.00355658	-0.00117557	0.0266663	-0.00381087	-0.0950045	0.00529257	1.56797e-05	0.000132974	0.0128752	-0.00337077	0.00584326	0.00226184	-0.00588311	0.00407122	5.58048e-06	0.0446862	-0.000330089	-0.00186386	-0.0130669	0.0207542	-0.130806	-0.00676856	-6.96847e-05	-0.00272206	-0.00686872	3.90969e-06	-3.26764e-05	-0.0345283	0.00286937	1.53538e-05	-0.000472292	7.79983e-09	0.00184791	-1.11759e-08	0.00184803	0.000624314	0.00118685	0.000265954
CAAAGAATCCCAGTGG.1	-0.00642916	-0.00145386	-0.101512	-0.0118046	0.017121	0.00307539	0.00107897	-3.02065e-05	-0.000282091	0.00114093	-0.00127807	-0.00386582	-0.00116626	0.00241575	-0.003869	-0.0503838	0.00528483	1.87531e-05	0.00013316	0.00399158	-0.00327933	0.00585315	0.00215264	-0.00568131	0.00406065	2.58945e-05	0.0922887	-0.000328993	-0.00188628	-0.0152529	0.0214412	-0.093439	-0.00917672	-7.10868e-05	-0.00272155	-0.0088667	4.89876e-06	-2.79583e-05	-0.0218697	0.00267762	1.68309e-05	0.000119055	8.3819e-09	0.00188391	2.6077e-08	0.00184475	0.000600055	0.0011812	0.000265729
CAACAACCAGGAACCA.1	-0.00929761	-0.000583763	-0.103085	0.000128545	0.011896	0.00291646	0.00112749	0.00553898	-0.000277125	0.0012888	-0.00140275	-0.00437527	-0.0011475	-0.00784266	-0.00467029	-0.0434576	0.00526727	1.46702e-05	0.000133729	-0.000611213	-0.00393595	0.00584521	0.00217002	-0.00555205	0.00407031	7.18311e-05	0.0979827	-0.00034943	-0.00174037	-0.0140481	0.0129953	-0.0943313	-0.00990259	-7.57999e-05	-0.002722	-0.00687265	4.45172e-06	-3.56417e-05	-0.0123438	0.00258014	1.75126e-05	0.000123162	8.14907e-09	0.00174039	-1.75089e-07	0.00184497	0.000474185	0.00114115	0.000265663
CAACAGTAGACCACGA.1	-0.00403208	-0.00127009	-0.0933037	-0.00195218	0.00413227	0.00299115	0.00107147	0.00355824	-0.000266659	0.00116666	-0.0012634	-0.00388246	-0.00117574	-0.00221814	-0.00377944	-0.0604371	0.0052959	1.60895e-05	0.00013327	0.00346536	-0.00321722	0.00580693	0.00215133	-0.00560385	0.00410411	8.72426e-05	0.0558006	-0.000325626	-0.00139806	-0.0100559	0.0102854	-0.0280516	-0.00717865	-6.77112e-05	-0.00271991	-0.00479421	-2.37301e-06	-3.67221e-05	-0.00308922	0.00260434	2.36742e-05	-0.000658486	8.3819e-09	0.0013957	-3.05171e-06	0.00183737	0.000442386	0.00118575	0.000265947
CAACAGTAGGTTCCAT.1	-0.00460739	-0.00134764	-0.0594464	-0.00932982	0.0109035	0.00296547	0.0011065	0.00351219	-0.000261068	0.00116368	-0.00133854	-0.00359505	-0.00117542	0.00536857	-0.00372259	-0.0827318	0.00529496	1.46404e-05	0.000133064	0.00811593	-0.00321094	0.00579429	0.00209067	-0.00571844	0.004114	3.26317e-05	0.0406382	-0.000324806	-0.00141831	-0.00951326	0.0126961	-0.0577315	-0.00716126	-6.53758e-05	-0.002722	-0.005263	-2.19233e-06	-4.18108e-05	-0.0184441	0.00270614	2.08728e-05	-0.0011477	7.68341e-09	0.00139999	-1.99536e-06	0.00185294	0.000552908	0.00118663	0.000265954
CAACAGTGTGGCGTAA.1	-0.00349688	-0.00122385	-0.0377489	-0.000657795	0.00356223	0.00291193	0.00107373	0.00542945	-0.00024868	0.00117093	-0.00133652	-0.00363066	-0.00117617	-0.000829814	-0.0036693	-0.0268187	0.00529651	1.44579e-05	0.000133026	0.00315789	-0.00314809	0.00577019	0.00208151	-0.00557983	0.00413496	9.27001e-05	0.02577	-0.000324307	-0.00106934	-0.0071186	0.00828893	-0.00739211	-0.00630009	-6.39964e-05	-0.002722	-0.00433932	-3.03797e-06	-4.98947e-05	-0.00497469	0.00256675	2.58759e-05	-0.00109494	8.11997e-09	0.00106144	-1.17018e-05	0.00184761	0.000491828	0.00118761	0.000265941
CAACAGTGTGGCTCTG.1	-0.00441534	-0.00146201	-0.0447771	-0.00964018	0.00871089	0.00310315	0.00113472	0.00436465	-0.000251589	0.00116455	-0.00129225	-0.00357913	-0.00117608	0.00654607	-0.00368552	-0.0663733	0.0052963	1.45063e-05	0.000132989	0.00660118	-0.0032168	0.00580307	0.00217621	-0.00561425	0.00410483	3.54331e-05	0.0395909	-0.000325089	-0.00121861	-0.00858922	0.0129208	-0.0462149	-0.00597109	-6.51856e-05	-0.002722	-0.00475952	1.09896e-07	-4.80339e-05	-0.0164806	0.0026015	2.03084e-05	-0.00115213	8.09086e-09	0.00120273	-6.37583e-06	0.00185309	0.00059633	0.00118741	0.000265809
CAACCTCGTCCGGACT.1	-0.00374223	-0.0013196	-0.0558239	-0.00268252	0.001026	0.00297213	0.001065	0.00478515	-0.000258976	0.00117142	-0.00130598	-0.00375069	-0.00117592	0.000471652	-0.00373642	-0.0512372	0.00529648	1.44616e-05	0.000133332	0.00315373	-0.00313412	0.00578556	0.00208423	-0.00556448	0.00412189	0.000105351	0.0318081	-0.0003243	-0.00122422	-0.00796553	0.0084187	-0.00188297	-0.00719788	-6.45138e-05	-0.00272198	-0.00396165	3.24845e-06	-4.85219e-05	-0.00184774	0.00255904	2.55592e-05	-0.0010427	8.14907e-09	0.00122388	-7.88178e-06	0.00185479	0.000421077	0.00118679	0.000265956
CAACCTCGTGAATGAT.1	-0.00870669	-0.000725912	-0.102834	8.67881e-05	0.0109733	0.00291449	0.00111856	0.00577773	-0.000276094	0.00127113	-0.00138398	-0.00427728	-0.00115183	-0.00740773	-0.004395	-0.03808	0.00527078	1.49868e-05	0.000133652	-0.000814059	-0.00376389	0.00583968	0.00214867	-0.00555202	0.00407536	7.91829e-05	0.0968232	-0.000344856	-0.00165232	-0.0135606	0.0122129	-0.0791597	-0.00928225	-7.44066e-05	-0.002722	-0.00775444	5.41192e-06	-3.91249e-05	-0.0105239	0.00257891	1.86749e-05	-8.41692e-05	8.14907e-09	0.00165232	-3.47616e-07	0.00184461	0.000487715	0.0011503	0.000265446
CAAGACTCAATCGCCG.1	-0.0302468	0.00753297	-0.0255243	-0.00318863	0.0178694	0.00318201	0.00124349	0.000298771	-0.000313794	0.00482962	-0.00117988	-0.0047647	-0.000958927	-0.0202838	-0.0270952	-0.000139022	0.00504738	1.75722e-05	0.000137562	0.000257703	-0.0129069	0.00597529	0.00321099	-0.00499471	0.00400477	1.54031e-05	0.0543495	-0.000421939	-0.00339244	-0.0296655	0.0362521	-0.134381	-0.0236304	-0.000118484	-0.00272536	-0.0196244	0.000226032	-6.66454e-06	-0.0214261	0.00265174	1.02725e-05	0.0114396	1.3446e-08	0.00342488	4.1387e-05	0.00182578	0.0012652	0.000316494	0.000256702
CAAGAGGAGTCATACC.1	-0.00922959	-0.000590635	-0.0889589	0.000190241	0.00951543	0.00291551	0.00111174	0.00693377	-0.000277628	0.00194431	-0.00135855	-0.00439763	-0.00117261	-0.00638152	-0.00498462	-0.026071	0.00529145	1.45957e-05	0.000134096	-0.00170334	-0.00386122	0.00584395	0.00211503	-0.00551322	0.00407295	9.02358e-05	0.0928836	-0.00034604	-0.00158039	-0.0125598	0.0116389	-0.0954554	-0.00874159	-7.5127e-05	-0.00272203	-0.00829104	1.26641e-05	-3.98625e-05	-0.00830564	0.00256448	1.78311e-05	7.82832e-05	8.17818e-09	0.00158056	-5.83939e-07	0.00185035	0.000455946	0.00112614	0.000265442
CAAGAGGTCTTGGCTC.1	-0.00489265	-0.00131059	-0.0835423	-0.00437405	0.00830781	0.00297199	0.00108373	0.00328344	-0.000267545	0.00115861	-0.00129852	-0.003778	-0.00117554	-0.00108669	-0.00381911	-0.0553707	0.00529516	1.6842e-05	0.000133082	0.00445375	-0.00319956	0.00580376	0.00219046	-0.00565152	0.00410587	5.31394e-05	0.0749895	-0.000325812	-0.00152883	-0.0112136	0.0122475	-0.0630832	-0.00734352	-6.73194e-05	-0.00272204	-0.00565472	1.92411e-06	-3.42261e-05	-0.0090788	0.00264679	2.04425e-05	-0.000450034	8.3819e-09	0.00152097	-1.56509e-06	0.00184708	0.000474691	0.00118672	0.000265947
CAAGCTAGTGGTCAAG.1	-0.00361001	-0.00122382	-0.0447379	-0.00105641	0.00417997	0.00290797	0.00107434	0.00526076	-0.000249553	0.00117007	-0.00133696	-0.00363284	-0.00117616	-0.000801574	-0.00367104	-0.0307947	0.00529619	1.44504e-05	0.000133019	0.00316087	-0.00314962	0.00577408	0.00208413	-0.005583	0.00413165	7.98814e-05	0.0332833	-0.000324374	-0.00109184	-0.00748717	0.00921513	-0.0201703	-0.00594493	-6.42055e-05	-0.00272201	-0.00455682	-5.56931e-07	-5.0161e-05	-0.00608072	0.00257003	2.49185e-05	-0.00109698	8.14907e-09	0.00108172	-9.75537e-06	0.00184807	0.000503302	0.00118761	0.000265926
CAAGCTATCATGAGAA.1	-0.00751895	-0.00115612	-0.0207564	-0.00568036	0.021716	0.00302801	0.00122499	0.00368168	-0.000257363	0.00114392	-0.00132918	-0.00352219	-0.00117587	-0.00143114	-0.00375018	-0.10496	0.00529144	1.48714e-05	0.000132898	0.010775	-0.00360226	0.00582479	0.00231558	-0.00576137	0.00408429	1.11172e-05	0.0759229	-0.000325395	-0.00159766	-0.0124628	0.0188743	-0.108911	-0.00273806	-6.60811e-05	-0.00272251	-0.0104523	2.55369e-06	-3.19891e-05	-0.0300521	0.00275321	1.37258e-05	-0.0012769	3.72529e-09	0.00158719	-1.70502e-06	0.00185045	0.000659138	0.00118693	0.000265956
CAAGGGAAGCCTCTCT.1	-0.0190545	0.000325948	-0.0514356	-0.000275274	0.0176994	0.00292256	0.00113533	0.00663709	-0.000294319	0.00685015	-0.00140435	-0.00583089	-0.00117303	-0.00779224	-0.00852845	-0.0344448	0.00529249	1.56313e-05	0.000134664	-0.00382743	-0.0048158	0.0058942	0.00234826	-0.0054237	0.00403838	6.40284e-05	0.0970479	-0.000379754	-0.00176285	-0.0158613	0.0168109	-0.166567	-0.00960816	-8.94131e-05	-0.00272291	-0.0118393	5.92042e-06	-3.3373e-05	-0.0171003	0.00256797	1.29752e-05	0.00211355	8.49832e-09	0.00177564	3.51574e-08	0.00184886	0.000573188	0.000994577	0.000265367
CAATACGGTGTAGCAG.1	-0.00736856	-0.00136869	-0.0677012	-0.0191733	0.0199308	0.00299507	0.00111816	0.000396593	-0.000278619	0.00113294	-0.00134021	-0.00360953	-0.0011687	0.0095059	-0.00384844	-0.0737514	0.00528465	1.5419e-05	0.000132896	0.0103244	-0.0033697	0.00585134	0.00216592	-0.00588311	0.00406061	7.5656e-06	0.0685371	-0.000328159	-0.00200052	-0.0152182	0.0218378	-0.117159	-0.00464451	-6.97348e-05	-0.00272198	-0.0089981	8.52905e-06	-2.65632e-05	-0.0254195	0.00287533	1.40034e-05	-0.000867041	7.91624e-09	0.00198926	8.67294e-09	0.00185058	0.000595778	0.00118701	0.000265943
CAATCGACAAGGGCAT.1	-0.00474384	-0.00127768	-0.100927	-0.00138108	0.00622875	0.00301514	0.00107366	0.00248588	-0.000274356	0.00116569	-0.00119489	-0.00400502	-0.00117517	-0.00421462	-0.00385607	-0.0421313	0.00529555	1.83843e-05	0.000133522	0.00283692	-0.00324564	0.00581891	0.00212143	-0.00557038	0.00409498	8.28132e-05	0.0721421	-0.000325462	-0.00152507	-0.011615	0.01143	-0.0251635	-0.00721142	-6.85971e-05	-0.00272184	-0.00659844	-5.1409e-07	-3.87132e-05	-0.00198078	0.00258291	2.262e-05	-0.000333849	8.61473e-09	0.00152426	-1.48523e-06	0.0018207	0.000463307	0.00118383	0.000265801
CAATTTCTCGGCATCG.1	-0.00326554	-0.00126578	-0.0288042	-0.00047534	-0.00139828	0.00290398	0.00107534	0.00575761	-0.000248238	0.00117431	-0.00132991	-0.00358887	-0.00117598	-0.000316851	-0.00366529	-0.0237221	0.00529653	1.47671e-05	0.000133056	0.00295225	-0.00310018	0.00576499	0.00208107	-0.00557128	0.0041398	0.000126848	0.00391059	-0.000324307	-0.00102719	-0.0063852	0.00701888	0.0184265	-0.00702333	-6.40149e-05	-0.00272142	-0.00278121	-3.8147e-06	-5.12879e-05	0.0016613	0.00255838	2.85059e-05	-0.00107664	8.14907e-09	0.00102446	-1.36616e-05	0.00185561	0.000414446	0.00118858	0.000265963
CACAACAAGTCCCAGC.1	-0.0223688	0.00222786	-0.075796	-0.00626593	0.0137098	0.00311205	0.00131752	-0.00322719	-0.000299145	0.00197316	-0.001318	-0.00379587	-0.00028114	-0.0156815	-0.0217583	-0.0225774	0.00437841	1.53221e-05	0.000137055	0.0104202	-0.00771591	0.00587958	0.00279756	-0.00540099	0.00401705	1.00303e-05	0.0348501	-0.000414154	-0.00313675	-0.0273195	0.0347962	-0.149326	-0.0279421	-0.00011157	-0.00272418	-0.00756449	2.66526e-05	-7.52881e-06	-0.0283612	0.00268926	1.17142e-05	0.00985423	1.0943e-08	0.00323616	1.82306e-05	0.00181656	0.000989003	0.000486567	0.00025844
CACAACACATGACTTG.1	-0.0092625	-0.00164065	-0.0790694	-0.0182959	0.00929075	0.00321202	0.00112041	-0.00148181	-0.00029495	0.00108895	-0.00129779	-0.00382466	-0.00117252	0.00367877	-0.0040247	-0.0588333	0.00528552	2.99402e-05	0.000132864	0.0254236	-0.00349327	0.00588541	0.0023508	-0.0057988	0.00403729	7.13242e-06	0.0432011	-0.000332413	-0.00257341	-0.020401	0.0307164	-0.117902	-0.00770865	-7.76186e-05	-0.00272192	-0.013687	1.22758e-05	-1.45882e-05	-0.0339426	0.00281669	1.2151e-05	0.000300758	9.66247e-09	0.0025571	8.86852e-07	0.00187494	0.000856891	0.00118629	0.000265887
CACAACATCATCAGTG.1	-0.0125865	-0.000566708	-0.0725162	-0.00201321	0.0216674	0.00309257	0.00116524	0.00246768	-0.000296851	0.001255	-0.00135854	-0.00411887	-0.00113596	-0.0120376	-0.00478389	-0.0263578	0.00522995	2.98955e-05	0.000133602	-0.00195957	-0.00440262	0.00590711	0.00250913	-0.00549386	0.004034	2.72281e-05	0.0945236	-0.000345012	-0.00219224	-0.0200717	0.0237854	-0.11861	-0.0111292	-8.89439e-05	-0.00272316	-0.0190951	6.48666e-06	-2.40393e-05	-0.0239181	0.0026014	1.33514e-05	0.00270843	1.234e-08	0.00218553	7.30157e-07	0.00183381	0.0011878	0.00113028	0.000258384
CACACAACAAACTCGT.1	-0.00330493	-0.00126974	-0.0277298	-0.000374911	-0.00133468	0.00290696	0.00108006	0.00596238	-0.000247736	0.00117439	-0.00133129	-0.00357571	-0.00117562	-0.000283046	-0.00366424	-0.0259607	0.00529623	1.45324e-05	0.000133082	0.00298494	-0.00310573	0.00576512	0.00208342	-0.00556907	0.0041398	0.000124265	-0.000435527	-0.000324292	-0.00100876	-0.00623652	0.00683113	0.0197555	-0.00709476	-6.38566e-05	-0.002722	-0.00280616	-3.8147e-06	-5.15804e-05	0.00173667	0.0025565	2.85953e-05	-0.00108974	8.14907e-09	0.00100743	-1.43729e-05	0.00185692	0.000417143	0.00119021	0.000265962
CACACAAGTCTCCCTA.1	-0.00387602	-0.00127263	-0.0556746	-0.0049854	0.00206578	0.0029091	0.00108025	0.00431558	-0.00025134	0.00116891	-0.00133844	-0.00361405	-0.00117615	0.00278421	-0.00368232	-0.045357	0.00529617	1.46739e-05	0.000132991	0.00525397	-0.00312557	0.00577473	0.00211916	-0.00559202	0.00413099	6.88974e-05	0.0397161	-0.000324382	-0.00114232	-0.00780546	0.00978584	-0.0300586	-0.00602847	-6.43955e-05	-0.00272203	-0.00425971	1.03377e-06	-4.97457e-05	-0.00566715	0.00257864	2.38419e-05	-0.00107332	8.09086e-09	0.00113031	-8.00076e-06	0.00185194	0.00045909	0.00118737	0.000265963
CACACAAGTTCTATCT.1	-0.00736926	-0.00174586	-0.0521212	-0.0247676	0.0146644	0.00321853	0.00126863	0.00110539	-0.000280968	0.00111619	-0.00138163	-0.00339323	-0.0011759	0.0156932	-0.00384286	-0.117342	0.00529083	1.771e-05	0.000132928	0.0309764	-0.00357031	0.00585984	0.00231666	-0.00582299	0.00405761	-1.57394e-07	0.0306886	-0.00032985	-0.00233077	-0.0142775	0.0247536	-0.125368	-0.00660756	-7.14849e-05	-0.00272266	-0.00813279	7.02217e-06	-2.666e-05	-0.0490593	0.00281768	1.23214e-05	-0.00169496	1.39698e-09	0.00232325	-4.02797e-08	0.00196853	0.000701427	0.00118887	0.000265928
CACAGATAGATCGCCC.1	-0.00928223	-0.000966992	-0.118913	-0.000557965	0.0154042	0.0029476	0.00114208	0.00277109	-0.000285613	0.00123145	-0.00141304	-0.00427955	-0.00105568	-0.00897751	-0.00408677	-0.0421062	0.00517168	2.02917e-05	0.000133293	-0.00158642	-0.00361301	0.0058586	0.00236245	-0.00556798	0.0040574	6.69137e-05	0.11176	-0.00034838	-0.00178902	-0.0157711	0.017116	-0.0807974	-0.00988407	-7.90129e-05	-0.002722	-0.010469	5.76582e-06	-3.40119e-05	-0.0143504	0.00258862	1.77082e-05	0.000371814	9.08039e-09	0.00179063	3.0268e-09	0.00182796	0.000707149	0.00115917	0.000264494
CACAGATTCGGTCAGC.1	-0.00353511	-0.00129284	-0.0472052	-0.0021215	0.00438084	0.00292627	0.0010802	0.0045655	-0.000249039	0.0011713	-0.00133453	-0.00362067	-0.00117615	0.000606855	-0.00367243	-0.0462555	0.00529651	1.44467e-05	0.000133026	0.0033002	-0.0031101	0.00577044	0.00210401	-0.0055822	0.00413507	7.58693e-05	0.0261912	-0.000324627	-0.00109359	-0.00713243	0.0088584	-0.0109566	-0.00662833	-6.45835e-05	-0.002722	-0.00369537	-3.40492e-06	-4.99599e-05	-0.00570282	0.00256903	2.49818e-05	-0.0010976	8.14907e-09	0.00108364	-8.72905e-06	0.00185455	0.000448033	0.0011876	0.000265963
CACATGAAGCACTAGG.1	-0.00342225	-0.00121767	-0.0405547	-0.000727542	0.00332501	0.00291128	0.00107666	0.0054442	-0.000248746	0.00117156	-0.0013349	-0.00362248	-0.00117617	-0.000699742	-0.00367165	-0.0257741	0.00529662	1.44579e-05	0.000133036	0.00322065	-0.00315252	0.00576895	0.00208039	-0.00557551	0.0041361	9.84054e-05	0.022634	-0.000324285	-0.0010637	-0.00705081	0.00792456	-0.00140813	-0.00635948	-6.39419e-05	-0.002722	-0.00407818	-3.54089e-06	-4.85294e-05	-0.00449011	0.00256237	2.65911e-05	-0.00109009	8.14907e-09	0.00105782	-1.26369e-05	0.0018483	0.000474125	0.0011876	0.000265941
CACATGAAGCTTAAGA.1	-0.00403422	-0.00127467	-0.0627965	-0.00756124	0.00228962	0.00290719	0.00108066	0.00399308	-0.000253658	0.00116695	-0.00134213	-0.00364892	-0.00117601	0.00479966	-0.0036952	-0.0524826	0.00529591	1.47223e-05	0.000132976	0.00659379	-0.00313816	0.00577816	0.00213333	-0.00560243	0.00412783	6.13108e-05	0.0469035	-0.000324471	-0.0012109	-0.00839642	0.0103971	-0.0421253	-0.00574028	-6.46143e-05	-0.002722	-0.00438643	3.85568e-07	-4.82071e-05	-0.00712547	0.00258923	2.28994e-05	-0.001041	8.09086e-09	0.00119606	-6.22356e-06	0.00185214	0.000460073	0.00118741	0.000265963
CACATGACAAGAAATC.1	-0.00384295	-0.00127101	-0.0486245	-0.00391381	0.00425959	0.00291019	0.00109476	0.00336711	-0.000253078	0.00116927	-0.00133401	-0.00360651	-0.00117603	0.00157565	-0.00367533	-0.0604401	0.0052959	1.4469e-05	0.000132998	0.00400315	-0.00314558	0.0057764	0.00208848	-0.00561881	0.00412863	6.45518e-05	0.0382893	-0.000324344	-0.00115551	-0.00792621	0.0105214	-0.0241245	-0.00673788	-6.42147e-05	-0.002722	-0.00376514	-2.76044e-06	-4.76018e-05	-0.00658405	0.00260556	2.41809e-05	-0.00105865	8.11997e-09	0.00114367	-4.71319e-06	0.00184835	0.000454292	0.00118758	0.000265963
CACATGACATGTGGTT.1	-0.0319029	0.0109134	0.00549336	6.01639e-05	0.0250904	0.00304994	0.0011812	0.00842658	-0.000297697	0.012959	-0.00130431	-0.00604798	-0.00117448	-0.0143588	-0.0458996	0.00805957	0.00527349	1.57394e-05	0.000136361	-0.00932691	-0.0156224	0.00594898	0.00366047	-0.0051211	0.00402943	2.58461e-05	0.0887745	-0.000427617	-0.00231519	-0.022108	0.0258056	-0.215646	-0.011103	-0.000107611	-0.00272392	-0.0226403	0.00177365	-8.71718e-06	-0.0262834	0.00263867	1.17682e-05	0.00327385	1.35042e-08	0.00234203	2.91876e-06	0.0018557	0.000814751	0.000356092	0.000259876
CACCAAAAGACGCTCC.1	-0.00337227	-0.00126271	-0.0394467	0.000132683	-0.000947317	0.00290358	0.00107492	0.00549778	-0.000249023	0.00117403	-0.00133161	-0.00362366	-0.00117617	-0.00103214	-0.00367617	-0.0241235	0.00529674	1.48192e-05	0.000133084	0.00268361	-0.00310547	0.00576935	0.00207958	-0.00556639	0.00413684	0.000128204	0.00788308	-0.000324478	-0.00106961	-0.00652975	0.0072197	0.015965	-0.00715286	-6.45886e-05	-0.00272176	-0.00280388	-3.80538e-06	-5.13401e-05	0.00176135	0.00255631	2.83308e-05	-0.00105464	8.14907e-09	0.00106838	-1.25698e-05	0.00185589	0.000411674	0.00118745	0.000265963
CACCAAACAAACCACT.1	-0.00380351	-0.00127419	-0.0423933	-0.00876986	0.00447424	0.00291934	0.00108288	0.00595413	-0.000249978	0.00116809	-0.00133812	-0.0036149	-0.00117614	0.00641106	-0.00369731	-0.0399004	0.00529618	1.52141e-05	0.000133002	0.00502758	-0.00312862	0.00578084	0.00209453	-0.00559664	0.00412539	5.80512e-05	0.0341041	-0.000324575	-0.0011344	-0.00796119	0.00973281	-0.0434205	-0.00574583	-6.45721e-05	-0.0027221	-0.00504899	3.63775e-06	-4.86281e-05	-0.0089955	0.00258333	2.29068e-05	-0.00108416	8.14907e-09	0.00112302	-9.01963e-06	0.00185201	0.000533	0.00118738	0.000265956
CACCAAACAACTTCTT.1	-0.00541313	-0.00133979	-0.077433	-0.0201656	0.0138848	0.00295869	0.00109894	0.00141819	-0.000271932	0.00115259	-0.00135222	-0.00370478	-0.00117562	0.0137371	-0.00380464	-0.0907167	0.00529386	1.4782e-05	0.000132997	0.00816948	-0.00327041	0.00582226	0.00212595	-0.00573343	0.00408793	1.55852e-05	0.0698424	-0.000325924	-0.00173754	-0.0120897	0.0171655	-0.0890511	-0.00658837	-6.77741e-05	-0.002722	-0.00522649	2.28733e-06	-3.4729e-05	-0.0228885	0.00272258	1.73282e-05	-0.0008086	8.09086e-09	0.00172356	-2.65893e-07	0.00185011	0.00052914	0.0011872	0.000265962
CACCGTTCAATTAGGA.1	-0.00736917	-0.00125932	-0.0339362	-0.0133606	0.0152906	0.0030381	0.00121456	0.00480017	-0.000266343	0.00113201	-0.00136269	-0.00350535	-0.00117593	0.00572993	-0.00381229	-0.10476	0.00529178	1.5337e-05	0.000132892	0.0166628	-0.00360243	0.00583784	0.00221114	-0.00580361	0.00407369	5.91576e-06	0.0657318	-0.000326669	-0.00180117	-0.0129708	0.019266	-0.115528	-0.00374332	-6.7379e-05	-0.00272266	-0.00893211	8.32789e-06	-3.37511e-05	-0.0336296	0.0027949	1.31186e-05	-0.00129416	-5.58794e-09	0.00179242	-8.645e-07	0.00187693	0.000641331	0.00118712	0.000265952
CACCGTTCAGCGACCT.1	-0.00420785	-0.00117019	-0.0751275	0.00106266	0.000895319	0.00290628	0.00108394	0.00511922	-0.000259863	0.00143271	-0.00133255	-0.0039556	-0.00116404	-0.00281943	-0.00385414	-0.0348421	0.0052838	1.44579e-05	0.000133652	0.00232627	-0.00320415	0.0057837	0.00209724	-0.00556338	0.00412464	0.000124864	0.0384921	-0.000328084	-0.00118127	-0.00770203	0.00812076	-0.00712991	-0.00723783	-6.57279e-05	-0.002722	-0.00395879	-1.66893e-06	-4.93079e-05	0.000986487	0.00255945	2.66135e-05	-0.000912759	8.14907e-09	0.00118304	-9.6357e-06	0.00185427	0.000422254	0.00118343	0.000265665
CACGTGGCACTACACA.1	-0.0264063	0.00282452	-0.0429384	-0.00582642	0.0133104	0.00323076	0.00132865	-0.00208317	-0.0003041	0.00223783	-0.00131844	-0.00398384	-0.00059053	-0.0166471	-0.0200069	-0.00951854	0.00468688	1.7982e-05	0.000137478	0.00769172	-0.00845559	0.00594891	0.00297652	-0.00523663	0.00401443	1.48346e-05	0.0346386	-0.000412432	-0.00309185	-0.0279316	0.0352324	-0.117123	-0.0252833	-0.000117977	-0.00272524	-0.014685	3.70741e-05	-8.84198e-06	-0.0192208	0.00269729	1.14068e-05	0.0130056	1.56288e-08	0.0031132	2.71811e-05	0.00177294	0.0016634	0.000509253	0.000258727
CACGTGGGTTCAGCTA.1	-0.00409307	-0.00129005	-0.08001	-0.00658392	0.00566771	0.00291451	0.001079	0.00344764	-0.000261824	0.00116448	-0.00133798	-0.00370321	-0.00117563	0.00264387	-0.00371009	-0.0622062	0.00529526	1.45994e-05	0.000133025	0.00636834	-0.00315481	0.00578802	0.0021141	-0.00565888	0.00411912	5.12488e-05	0.0534662	-0.000324762	-0.00138404	-0.00962905	0.0118847	-0.0524982	-0.00608275	-6.53346e-05	-0.00272203	-0.00460455	1.27777e-06	-4.38429e-05	-0.0100672	0.002647	2.22083e-05	-0.000967	8.11997e-09	0.0013669	-2.4836e-06	0.00185329	0.000472993	0.00118724	0.000265963
CACGTGGTCTGAGCAT.1	-0.00348549	-0.00129011	-0.0394755	-0.00312988	0.00534069	0.00293682	0.00109355	0.00583978	-0.000249605	0.00116901	-0.00133117	-0.00355823	-0.00117555	0.000690628	-0.0036846	-0.0471378	0.00529528	1.47633e-05	0.000132982	0.00343654	-0.00314694	0.00578538	0.00210194	-0.00560083	0.00412181	6.80443e-05	0.0377976	-0.000324754	-0.00113264	-0.00797405	0.0104516	-0.0314266	-0.00590619	-6.45593e-05	-0.00272204	-0.0042088	2.83681e-06	-4.62458e-05	-0.00869697	0.00258779	2.36444e-05	-0.00111815	8.11997e-09	0.00111944	-9.13884e-06	0.00184485	0.000514403	0.00118759	0.000265818
CACGTTCGTGACTATC.1	-0.00343802	-0.00123447	-0.0357159	-0.000314543	0.00345101	0.00291212	0.00107638	0.00560552	-0.000248355	0.00117143	-0.00133566	-0.00361041	-0.00117617	-0.00110648	-0.0036673	-0.0261721	0.00529662	1.4443e-05	0.00013303	0.00307875	-0.00313617	0.00576848	0.00208047	-0.00557819	0.00413664	0.000101093	0.023339	-0.000324277	-0.00106682	-0.00703256	0.00790062	-0.000386506	-0.00638462	-6.39462e-05	-0.002722	-0.00423715	-3.38629e-06	-4.88423e-05	-0.00458267	0.00256504	2.64123e-05	-0.00109531	8.14907e-09	0.00106095	-1.26259e-05	0.00184612	0.000475138	0.00118761	0.000265941
CACTAAGCACAAGTTC.1	-0.00349497	-0.0012641	-0.0434158	0.000343856	-0.000649493	0.00290988	0.0010767	0.00567525	-0.000249363	0.00118006	-0.00133127	-0.00365551	-0.00117611	-0.00115307	-0.00370162	-0.0286887	0.0052967	1.44839e-05	0.000133168	0.00252383	-0.00311029	0.00577178	0.00208435	-0.00556417	0.0041341	0.000126181	0.005538	-0.00032462	-0.00105656	-0.00646888	0.00713007	0.0132623	-0.00722529	-6.43316e-05	-0.00272192	-0.00295137	-2.97092e-06	-5.12823e-05	0.0015676	0.00255626	2.80514e-05	-0.00104306	8.14907e-09	0.00105829	-1.3028e-05	0.00185552	0.000412688	0.00118736	0.000265948
CACTGAATCCTCATAT.1	-0.0163478	0.000263736	-0.0574485	0.00112404	0.00994529	0.0029595	0.00112828	0.00631877	-0.000291503	0.00586235	-0.00137104	-0.00558801	-0.00117168	-0.00833544	-0.0120655	-0.0465156	0.00528986	1.53929e-05	0.000134533	0.000335756	-0.00480012	0.00589281	0.00264425	-0.00542375	0.00404089	6.56061e-05	0.0835623	-0.000374837	-0.0017093	-0.0147685	0.0159851	-0.17514	-0.00912559	-8.7949e-05	-0.00272257	-0.00927761	5.52088e-06	-3.3332e-05	-0.0143448	0.00256755	1.28569e-05	0.00219603	8.41101e-09	0.00171435	-4.65661e-08	0.00184827	0.000518411	0.0010189	0.000264933
CACTGGGCATGTACGT.1	-0.00329371	-0.00125944	-0.0328589	-0.000831384	-0.00123153	0.00290471	0.00107199	0.00539086	-0.000249551	0.00117408	-0.00132957	-0.00361538	-0.00117615	-0.000269575	-0.00366928	-0.0250269	0.00529667	1.47186e-05	0.000133019	0.00299899	-0.00309774	0.00576585	0.00208078	-0.00557309	0.00413833	0.000126794	0.0152656	-0.000324382	-0.00106332	-0.00671838	0.00740678	0.0155062	-0.00693519	-6.44256e-05	-0.00271991	-0.00277299	-3.79235e-06	-5.05671e-05	0.00127274	0.00256035	2.81744e-05	-0.00106067	8.14907e-09	0.00106059	-1.23912e-05	0.00184852	0.00041388	0.00118797	0.000265963
CACTGGGGTGACAGCA.1	-0.00888899	-0.000657728	-0.103196	0.000367646	0.0118769	0.00292788	0.00111939	0.0046432	-0.000278693	0.00132621	-0.00132832	-0.00430346	-0.00116469	-0.00751483	-0.00458885	-0.0374987	0.00528028	1.53556e-05	0.00013392	-0.000292267	-0.00386013	0.00584145	0.002188	-0.00552918	0.00407419	7.8138e-05	0.0910721	-0.000340765	-0.00165742	-0.013412	0.0128048	-0.0834067	-0.00971094	-7.35284e-05	-0.00272236	-0.00761771	5.45196e-06	-4.05367e-05	-0.0106177	0.00257824	1.89003e-05	0.000403821	8.3819e-09	0.00165744	-2.99187e-07	0.00183416	0.000495926	0.00113988	0.000264375
CACTGGGTCAGCAGAG.1	-0.009447	-0.000761202	-0.108441	-0.000204593	0.0162233	0.00294953	0.00112158	0.005062	-0.000287071	0.00129655	-0.00138877	-0.0043322	-0.00112868	-0.00876221	-0.00437991	-0.0357447	0.00524519	1.6544e-05	0.000133734	-0.00192476	-0.00379919	0.00585738	0.0023165	-0.00553025	0.00405993	6.43637e-05	0.103058	-0.000343559	-0.00177325	-0.0152623	0.0149289	-0.0953608	-0.00978592	-7.59666e-05	-0.00272198	-0.00999519	6.01239e-06	-3.50289e-05	-0.0144799	0.00257409	1.74157e-05	0.00083347	8.61473e-09	0.00177438	-3.70201e-08	0.00183272	0.000645027	0.0011391	0.000264714
CACTGTCAGAGGACTC.1	-0.0116301	-0.000791798	-0.0702509	-0.00515117	0.0235106	0.00320693	0.00120073	-0.0039074	-0.000297483	0.00113589	-0.00117602	-0.00374296	-0.00115635	-0.0128611	-0.00437263	-0.0272724	0.00522182	3.01544e-05	0.000133483	-0.00330632	-0.00452916	0.00594613	0.00225919	-0.00559725	0.00403306	1.38581e-05	0.0813249	-0.000359273	-0.00270345	-0.0235871	0.0362689	-0.121058	-0.0120962	-0.000103221	-0.00272297	-0.0243841	7.85105e-06	-1.71531e-05	-0.0290357	0.00273041	1.24834e-05	0.0024399	1.21072e-08	0.00264365	6.74976e-06	0.00183529	0.00136347	0.00115871	0.000252381
CACTGTCTCATGCGGC.1	-0.00423691	-0.00129884	-0.0900626	-0.00258994	0.00529552	0.00300498	0.00105945	0.00345486	-0.000268741	0.00116724	-0.00122801	-0.00387206	-0.00117579	-0.00229808	-0.00374245	-0.0532828	0.00529567	1.65403e-05	0.000133239	0.00350968	-0.0031839	0.00580051	0.00210493	-0.0055839	0.00410177	8.62963e-05	0.060103	-0.000325074	-0.00145787	-0.0107861	0.010399	-0.0155571	-0.00621596	-6.6152e-05	-0.00271479	-0.00558129	-1.99117e-06	-3.68487e-05	-0.00236726	0.00258575	2.29254e-05	-0.000922661	8.14907e-09	0.00145357	-1.8971e-06	0.00183352	0.000441745	0.00118569	0.000265943
CAGAGCCCATTGACTG.1	-0.00384063	-0.00126922	-0.0416188	-0.00616077	0.00427199	0.00291968	0.00108514	0.00623962	-0.000250597	0.00116798	-0.00133908	-0.00359515	-0.00117614	0.00381886	-0.00369384	-0.042014	0.00529619	1.46329e-05	0.000132985	0.00435775	-0.00313188	0.00578091	0.00209083	-0.00560279	0.00412556	6.54403e-05	0.0354118	-0.00032456	-0.00114686	-0.0079223	0.0100001	-0.0396724	-0.00576298	-6.45689e-05	-0.00272209	-0.00498834	3.8445e-06	-4.86635e-05	-0.00818688	0.00258952	2.2836e-05	-0.00109036	8.14907e-09	0.00113474	-9.12207e-06	0.00184648	0.000521153	0.00118756	0.000265934
CAGAGCCGTAGCTAAA.1	-0.0316385	0.00545496	0.0229675	-0.00222431	0.0190542	0.00379652	0.00142996	0.004212	-0.000388915	0.00241673	-0.000996577	-0.00402094	-0.000786376	-0.0267678	-0.00882905	-0.00108624	0.00481981	3.06424e-05	0.000136856	-0.0130857	-0.0119784	0.00604044	0.00327699	-0.00502558	0.00393942	1.31119e-05	0.0283919	-0.000424495	-0.00380163	-0.0339997	0.047602	-0.00859511	-0.0223002	-0.000161662	-0.00272199	-0.0390711	7.64243e-05	-6.33486e-06	-0.0113599	0.00269068	9.14931e-06	0.00694365	1.84227e-08	0.00366769	9.83393e-05	0.0017877	0.00296987	0.00088106	0.000241868
CAGATCAAGATGTTAG.1	-0.00366137	-0.00126308	-0.0492529	-0.00110183	0.00368666	0.00291017	0.00108074	0.00431991	-0.000250797	0.00117118	-0.00133288	-0.00361368	-0.00117612	-0.000796279	-0.00366948	-0.0409816	0.00529638	1.4443e-05	0.00013301	0.00291363	-0.00312303	0.00577092	0.00209052	-0.00559425	0.0041344	7.79461e-05	0.0369734	-0.000324359	-0.00110015	-0.00750801	0.00936489	-0.00745979	-0.00639275	-6.42578e-05	-0.002722	-0.00385258	-2.6878e-06	-5.01741e-05	-0.00480497	0.00258103	2.56076e-05	-0.00107812	8.14907e-09	0.00109125	-7.94302e-06	0.0018486	0.000453591	0.0011876	0.000265963
CAGATCACACCTGTCT.1	-0.00710286	-0.0013989	-0.0899002	-0.0277065	0.0224263	0.00299893	0.0010867	0.00228187	-0.00027515	0.00113984	-0.00133445	-0.00364612	-0.00117499	0.0201648	-0.00380359	-0.0827925	0.00529254	1.49831e-05	0.000133038	0.0103341	-0.00328581	0.00584424	0.00224512	-0.00591075	0.00406988	8.96444e-06	0.0476992	-0.000329172	-0.00180441	-0.0131502	0.0191168	-0.12624	-0.0073005	-6.94622e-05	-0.002722	-0.00672108	2.95416e-06	-3.35574e-05	-0.0331182	0.00289863	1.60728e-05	-0.000600789	8.09086e-09	0.0017867	4.88944e-09	0.00184564	0.000621691	0.00118718	0.000265954
CAGATTGCACAATGTC.1	-0.0065096	-0.00114171	-0.106894	-0.000688791	0.0119942	0.00296807	0.00111444	0.00297876	-0.000279431	0.00117233	-0.00121898	-0.00396699	-0.00117305	-0.00669824	-0.00413776	-0.0371536	0.00528709	1.92299e-05	0.000133853	0.000675169	-0.00345993	0.00584695	0.00229553	-0.00552919	0.00407288	6.53788e-05	0.0867277	-0.000329008	-0.00165601	-0.0133273	0.0136353	-0.0523087	-0.00956841	-7.12344e-05	-0.00272306	-0.00805298	1.97068e-06	-4.11626e-05	-0.00807142	0.00258324	2.06698e-05	0.000828888	9.31323e-09	0.00165608	-4.33531e-07	0.00182035	0.000549957	0.00115688	0.000263711
CAGATTGGTGCAAGAC.1	-0.00338116	-0.00125963	-0.0494301	-6.64922e-05	0.000129458	0.00290926	0.00107063	0.00506382	-0.000252513	0.00117224	-0.00132623	-0.00367588	-0.00117612	-0.00152026	-0.00367482	-0.0363519	0.00529659	1.52998e-05	0.000132956	0.00310825	-0.00310101	0.00577285	0.00210997	-0.00558223	0.00413006	0.000120003	0.028497	-0.000324583	-0.00113237	-0.00726203	0.00779791	0.00260451	-0.00732503	-6.47776e-05	-0.00271494	-0.00284645	-3.74578e-06	-5.02374e-05	-0.000108242	0.00257157	2.71536e-05	-0.00104235	8.14907e-09	0.00112944	-9.83942e-06	0.00184252	0.00041236	0.00118755	0.000265963
CAGCACGAGTAATTGG.1	-0.00346317	-0.00127719	-0.0395386	-0.000221308	-0.000103451	0.00291412	0.00107747	0.00540268	-0.000249854	0.00117224	-0.0013259	-0.00361712	-0.00117613	-0.000805339	-0.00367343	-0.0407169	0.00529668	1.47186e-05	0.000133013	0.00350983	-0.00311611	0.00576595	0.00213459	-0.00558038	0.00413082	0.000107003	0.00634541	-0.000324635	-0.00109629	-0.00663742	0.00753852	-0.000627577	-0.00763039	-6.44008e-05	-0.00271246	-0.00301962	-3.74019e-06	-5.1057e-05	-0.000126332	0.00257023	2.70978e-05	-0.00107076	8.14907e-09	0.00109474	-1.14969e-05	0.00185396	0.000418648	0.00118813	0.000265962
CAGCCAGTCACCCTGT.1	-0.00411671	-0.00129522	-0.0388895	-0.00996342	0.00629773	0.00293493	0.00108974	0.00636313	-0.000252343	0.00116598	-0.00133563	-0.00361967	-0.001175	0.00714206	-0.00370718	-0.0465231	0.00529488	1.44877e-05	0.000132997	0.00463472	-0.00314533	0.00578598	0.00218797	-0.00559923	0.00412069	4.94029e-05	0.0428425	-0.000324829	-0.00121224	-0.0084142	0.0104357	-0.0504361	-0.00557805	-6.49379e-05	-0.002722	-0.00534701	3.07895e-06	-4.59999e-05	-0.0112925	0.0025868	2.19364e-05	-0.00106283	8.14907e-09	0.00119668	-8.1961e-06	0.00184561	0.000527516	0.00118742	0.000265963
CAGGCCACAAGTGGCA.1	-0.00863314	-0.00047509	-0.0922821	0.000396096	0.0082179	0.00291585	0.0011125	0.00641204	-0.000277047	0.00208992	-0.00135019	-0.00438336	-0.00117253	-0.00601084	-0.00495406	-0.0267798	0.00528929	1.46739e-05	0.000134081	-0.000801886	-0.00395897	0.00583611	0.00212387	-0.00551027	0.00408057	9.77311e-05	0.0888438	-0.000346592	-0.00152607	-0.0119701	0.0111382	-0.0845186	-0.00853044	-7.40234e-05	-0.00272252	-0.00828552	1.58194e-05	-4.21274e-05	-0.00694746	0.00256199	1.87345e-05	-0.000137903	8.17818e-09	0.0015261	-1.25449e-06	0.00184951	0.000455827	0.00113434	0.000264889
CAGGGCTGTAGAGACC.1	-0.0166141	0.00103596	-0.0809724	-0.000168095	0.0184608	0.00296325	0.00114196	0.00453749	-0.000295542	0.00203163	-0.00144051	-0.00459675	-0.00111614	-0.011301	-0.00635758	-0.0328013	0.00522916	1.87121e-05	0.000134289	-0.001556	-0.00570879	0.00588687	0.00224652	-0.00546208	0.00403699	4.80469e-05	0.097171	-0.000363229	-0.00196227	-0.0180126	0.0185914	-0.146669	-0.0118921	-8.48074e-05	-0.00272212	-0.0134779	3.67686e-06	-2.6932e-05	-0.015373	0.00258783	1.3588e-05	0.00323226	9.57516e-09	0.00197116	3.60655e-07	0.00182413	0.000856236	0.000982322	0.000263354
CAGTGCGCAATTCGTG.1	-0.00665189	-0.00156068	-0.0923787	-0.0096989	0.0158197	0.0031713	0.00108369	-0.00398726	-0.000288812	0.00112764	-0.00125759	-0.00387363	-0.0011649	-0.00224001	-0.00385807	-0.0470583	0.00528207	2.39834e-05	0.00013298	0.00868618	-0.00330529	0.00586362	0.00216077	-0.00570941	0.00405182	2.09175e-05	0.0828607	-0.000329671	-0.00221548	-0.017814	0.0266865	-0.0903344	-0.00919455	-7.38813e-05	-0.00271978	-0.0124826	6.13183e-06	-2.02488e-05	-0.0242521	0.00271465	1.41691e-05	-0.000157125	9.54606e-09	0.00221099	3.44357e-07	0.0018466	0.000694558	0.0011811	0.000265744
CAGTTAGCACTCAAGT.1	-0.00339244	-0.00124329	-0.0408423	-0.000722614	0.00223371	0.00290975	0.00107288	0.00553887	-0.000249449	0.00117237	-0.00133414	-0.00364061	-0.00117617	-0.000656854	-0.00367495	-0.0242611	0.00529669	1.45249e-05	0.000133026	0.00274687	-0.00312338	0.00576937	0.00209114	-0.0055788	0.00413576	0.000102686	0.0269297	-0.000324382	-0.00107471	-0.00702216	0.00777355	0.00272805	-0.00654262	-6.40785e-05	-0.00272201	-0.00368153	-3.69176e-06	-5.00437e-05	-0.0029144	0.00256594	2.69711e-05	-0.00108629	8.14907e-09	0.00106813	-1.16124e-05	0.00185136	0.000450254	0.00118759	0.000265963
CATAAGCAGACCAGCA.1	-0.00388777	-0.00127615	-0.0372107	-0.00976166	0.00406008	0.00292679	0.00109002	0.00579003	-0.000250648	0.00116632	-0.0013394	-0.00359793	-0.00117614	0.00693991	-0.00371707	-0.0472865	0.00529621	1.51396e-05	0.000132978	0.00625167	-0.00314358	0.00578379	0.00210061	-0.00561622	0.00412289	5.41192e-05	0.0409633	-0.000324732	-0.0011698	-0.00839909	0.0109168	-0.0518019	-0.00543248	-6.47375e-05	-0.00272222	-0.00504175	5.29736e-06	-4.8345e-05	-0.00958347	0.00260252	2.12993e-05	-0.00107579	8.11997e-09	0.00115659	-8.07154e-06	0.00184709	0.000519052	0.00118752	0.000265954
CATAAGCTCAGACAAA.1	-0.00972007	-0.00036844	-0.105439	4.16273e-05	0.0133901	0.00293433	0.00115442	0.00401206	-0.00028284	0.00129757	-0.00142594	-0.00440597	-0.0011245	-0.00899751	-0.00487646	-0.0503572	0.00524374	1.51917e-05	0.000133706	0.000580143	-0.00423197	0.00585312	0.00226806	-0.0055587	0.00406197	6.52689e-05	0.0985685	-0.000355734	-0.00185785	-0.0153036	0.0148869	-0.103199	-0.0102668	-7.81225e-05	-0.00272219	-0.00723633	3.09758e-06	-2.98768e-05	-0.0146632	0.00258776	1.64267e-05	0.000424096	8.3819e-09	0.00185784	-2.14204e-08	0.00184132	0.000521474	0.00112194	0.00026546
CATAAGCTCGGAATTC.1	-0.0061545	-0.00136567	-0.0905019	-0.00918683	0.0104017	0.00298036	0.00108759	0.000539609	-0.000274735	0.00114866	-0.00129382	-0.00396892	-0.00117361	0.000919316	-0.00379371	-0.056265	0.00529275	1.72518e-05	0.000132997	0.00658721	-0.00325128	0.00584127	0.00211516	-0.00575723	0.00406592	3.53381e-05	0.091462	-0.000327593	-0.00182859	-0.0142234	0.0188604	-0.0758868	-0.00667518	-7.06735e-05	-0.00271812	-0.00978798	-1.28523e-07	-2.77366e-05	-0.0174831	0.00275336	1.75592e-05	-0.000684455	8.3819e-09	0.00182593	1.14087e-08	0.00185048	0.000562057	0.00118341	0.000265809
CATACTTTCTAACACG.1	-0.00420454	-0.00130128	-0.0508104	-0.00872775	0.0109374	0.0029237	0.00110707	0.00209309	-0.000255945	0.00116432	-0.00134163	-0.00361503	-0.00117532	0.00522154	-0.00370821	-0.0887871	0.00529491	1.51508e-05	0.000132941	0.00668422	-0.00319044	0.00578817	0.00208751	-0.00565879	0.00411909	4.31668e-05	0.0442025	-0.000324687	-0.00132591	-0.00908224	0.0130299	-0.0559949	-0.0067609	-6.52355e-05	-0.002722	-0.00479752	-1.92225e-06	-4.25614e-05	-0.0167336	0.00264603	2.12118e-05	-0.00109786	7.567e-09	0.00130862	-2.5616e-06	0.00185429	0.000490561	0.00118731	0.000265963
CATCAAGGTCAGTCGC.1	-0.0150747	-0.000236923	-0.0656403	0.000708312	0.0134339	0.00292613	0.00111798	0.00744031	-0.000287984	0.00584399	-0.00140505	-0.0054221	-0.00117247	-0.00734425	-0.00689855	-0.0344008	0.00529286	1.59964e-05	0.000134028	-0.00422891	-0.00423182	0.00587973	0.00222902	-0.00543661	0.00404568	7.31498e-05	0.0921068	-0.000358908	-0.00171954	-0.0140307	0.0152062	-0.144865	-0.00926861	-8.22987e-05	-0.00272222	-0.0107319	5.61308e-06	-3.68636e-05	-0.0117916	0.00256182	1.45733e-05	0.00118124	8.44011e-09	0.0017254	3.0268e-09	0.00184909	0.000491902	0.00109329	0.00026565
CATCAAGTCCTGTACC.1	-0.00676201	-0.00092575	-0.0964695	0.000770478	0.00706768	0.00291136	0.00109487	0.00518263	-0.000272507	0.00130131	-0.00130717	-0.00410867	-0.00115838	-0.00599784	-0.00405934	-0.0334972	0.00527459	1.46292e-05	0.000133635	0.00103858	-0.0034881	0.00581749	0.00211423	-0.00553761	0.00409503	0.000103489	0.0774387	-0.000334306	-0.00148918	-0.0113085	0.0101485	-0.0480124	-0.00814828	-6.95996e-05	-0.00272205	-0.008237	4.64357e-06	-4.58416e-05	-0.00638157	0.00256409	2.2132e-05	-0.000609297	8.14907e-09	0.0014896	-1.33109e-06	0.00183742	0.000477955	0.00117044	0.000264529
CATCCACCATAGGCGA.1	-0.00967734	-1.10716e-05	-0.0900398	0.00124094	0.0100642	0.0029242	0.00111671	0.00582491	-0.00027808	0.00257011	-0.00132104	-0.00472279	-0.00117353	-0.00688028	-0.00532311	-0.027133	0.00528947	1.48267e-05	0.000134282	-0.00102135	-0.00442442	0.00584729	0.00225893	-0.00547525	0.00407397	9.63453e-05	0.0864376	-0.000345169	-0.00154402	-0.0123335	0.0116465	-0.0883409	-0.00826309	-7.51222e-05	-0.00272447	-0.00838399	3.83649e-05	-4.53312e-05	-0.00860912	0.00256275	1.80714e-05	0.000248726	8.14907e-09	0.00154417	-1.07475e-06	0.00183423	0.000453845	0.00112653	0.000264494
CATCCCAGTAATGCTC.1	-0.017425	-0.00309287	-0.000131961	-0.0278357	-0.00746098	0.00511299	0.00335462	0.0184747	-0.000289001	0.000984989	-0.000982516	-0.00386949	-0.00117424	0.00964381	-0.00411457	-0.106402	0.00527548	1.54339e-05	0.000133241	0.0532509	-0.00341067	0.00590907	0.00581554	-0.0063564	0.00403135	-0.000278028	0.03153	-0.000338746	-0.00271876	-0.0216775	0.0436388	-0.185965	-0.00816741	-9.25215e-05	-0.00272782	-0.0401265	1.7345e-05	-4.65469e-06	-0.0538015	0.00340613	-1.01328e-06	-0.00259803	-1.18511e-07	0.00258626	2.68221e-07	0.00183915	0.00485361	0.00118615	0.000263201
CATCCGTGTACAATAG.1	-0.00367571	-0.00124123	-0.0414325	-0.00153878	0.00429468	0.00290797	0.00107767	0.0051387	-0.000249855	0.00116867	-0.00133834	-0.00361969	-0.00117616	-0.000677597	-0.0036792	-0.0372943	0.00529586	1.4469e-05	0.00013301	0.00375942	-0.0031398	0.00577842	0.00209382	-0.00558951	0.00412771	7.77021e-05	0.0382411	-0.000324449	-0.00112119	-0.00782763	0.00962488	-0.0317072	-0.00579823	-6.42909e-05	-0.00272213	-0.00460309	7.20844e-07	-4.91254e-05	-0.00639147	0.00257668	2.39052e-05	-0.00109576	8.11997e-09	0.00110908	-8.88365e-06	0.00184675	0.000491709	0.00118759	0.000265844
CATCGCTCACACCGAC.1	-0.00338397	-0.00126152	-0.0408924	0.000218392	-0.00082447	0.00290414	0.00107471	0.00546038	-0.000249183	0.00117381	-0.00133166	-0.00362488	-0.00117617	-0.0011515	-0.00367854	-0.0251816	0.00529672	1.48006e-05	0.000133108	0.00266725	-0.00310849	0.00577043	0.00207974	-0.00556697	0.00413624	0.000127222	0.00822557	-0.000324501	-0.00107993	-0.00656566	0.00725953	0.0161956	-0.00715426	-6.48308e-05	-0.00272189	-0.00283344	-3.77372e-06	-5.13811e-05	0.00177577	0.00255667	2.82302e-05	-0.00105224	8.14907e-09	0.00107871	-1.22609e-05	0.00185619	0.000411525	0.00118753	0.000265963
CATCGGGAGTCAATCC.1	-0.0161473	-0.00025284	-0.061654	0.000905495	0.0118222	0.0029464	0.0011213	0.00804504	-0.000289013	0.00524078	-0.00139757	-0.00536958	-0.0011734	-0.0077341	-0.00848427	-0.0378993	0.00529302	1.77957e-05	0.0001339	-0.00402671	-0.0042528	0.00588486	0.0023951	-0.00541796	0.00404218	6.61034e-05	0.0857398	-0.000364145	-0.0017073	-0.0141674	0.0156009	-0.153637	-0.00899421	-8.27597e-05	-0.00272273	-0.0107187	5.59166e-06	-3.58894e-05	-0.0108954	0.00256675	1.38171e-05	0.00144903	8.73115e-09	0.00171592	-7.45058e-09	0.00185428	0.000489205	0.00106922	0.000265263
CATCGGGCATGTGGCC.1	-0.0203142	0.00143723	-0.0367749	-0.00423805	0.0281648	0.00314806	0.00125035	0.000395231	-0.000297745	0.00210097	-0.00135526	-0.00419184	-0.00103747	-0.0137519	-0.00840085	-0.0184734	0.00512115	2.55741e-05	0.000135507	-0.00659572	-0.00666932	0.00595243	0.00239339	-0.00535314	0.00402753	2.6172e-05	0.0603945	-0.000389641	-0.002516	-0.0238866	0.030578	-0.115455	-0.0133497	-0.000109754	-0.00272711	-0.0188187	5.9111e-06	-1.66222e-05	-0.0154922	0.0026618	1.21212e-05	0.00859891	1.35624e-08	0.00246499	1.36257e-05	0.00176217	0.00136103	0.000887349	0.000255954
CATGAGTCACCGGCTA.1	-0.0202379	0.00064809	-0.0436733	-0.000812415	0.0182806	0.0029216	0.00113609	0.00729199	-0.00029495	0.00706159	-0.00141443	-0.00588692	-0.00117294	-0.00729409	-0.00873641	-0.0344692	0.00529245	1.64844e-05	0.000134576	-0.00497057	-0.00513453	0.005896	0.00233715	-0.00541835	0.00403694	6.13648e-05	0.097715	-0.000380693	-0.00175453	-0.0159543	0.0171871	-0.169326	-0.00966016	-9.04356e-05	-0.00272298	-0.0125257	5.92554e-06	-3.2967e-05	-0.0173031	0.00257157	1.28802e-05	0.00216211	8.55653e-09	0.00176789	3.77186e-08	0.00184832	0.000583544	0.000990167	0.000265367
CATGAGTCAGCCCACA.1	-0.00409039	-0.00142376	-0.0471442	-0.00873262	0.00819566	0.00306556	0.00110953	0.00459641	-0.000251107	0.00116578	-0.00130221	-0.00360069	-0.00117608	0.0058548	-0.00368616	-0.05937	0.00529644	1.45435e-05	0.000132991	0.0052722	-0.0031883	0.00579883	0.00215481	-0.00559691	0.00410934	4.33773e-05	0.0387565	-0.000325037	-0.00119259	-0.00842251	0.0124543	-0.0429809	-0.00589994	-6.50404e-05	-0.002722	-0.00455826	1.23493e-06	-4.87417e-05	-0.0145865	0.0025839	2.11056e-05	-0.00112389	8.11997e-09	0.00117733	-7.41915e-06	0.00185219	0.000555307	0.00118746	0.00026584
CATGAGTTCTACCACC.1	-0.0222684	0.000607798	-0.0419161	-0.00107017	0.022635	0.00293197	0.0011356	0.0061791	-0.000296686	0.00625519	-0.00135187	-0.00538116	-0.00117304	-0.00924987	-0.0086294	-0.027545	0.00529	1.54823e-05	0.000134762	-0.00634853	-0.00512372	0.0058918	0.00225108	-0.00537536	0.00403536	5.68219e-05	0.104619	-0.000379315	-0.00192555	-0.0176441	0.0196663	-0.172938	-0.00967854	-8.86942e-05	-0.00272308	-0.016742	6.05267e-06	-2.62428e-05	-0.0201803	0.00257379	1.25961e-05	0.00175012	8.73115e-09	0.00195226	3.07336e-07	0.00185075	0.000657946	0.000922418	0.000264473
CATGCAAAGGCAATGC.1	-0.00637424	-0.00151263	-0.0577365	-0.0185403	0.0190634	0.0031202	0.00109315	0.00474128	-0.00026276	0.0011538	-0.00136432	-0.00359448	-0.00117184	0.013108	-0.00373266	-0.0912601	0.00529043	1.45175e-05	0.000133026	0.00941066	-0.00320883	0.00581449	0.00211808	-0.00583386	0.00409411	2.09245e-05	0.0430079	-0.000325454	-0.00152693	-0.0109874	0.014209	-0.089923	-0.00815082	-6.61347e-05	-0.002722	-0.00657922	-1.02818e-06	-3.88082e-05	-0.0290367	0.00282145	1.80937e-05	-0.00114604	8.09086e-09	0.00150526	-2.75439e-07	0.00184865	0.000823274	0.00118714	0.000265962
CATGCCTTCGGTAGAG.1	-0.0159403	0.000563997	-0.0882155	-0.000247734	0.0196541	0.00298068	0.00115877	0.0029921	-0.000295749	0.00155202	-0.0014106	-0.00432335	-0.00112684	-0.0125057	-0.0055519	-0.0356042	0.00524165	1.65142e-05	0.000134554	0.00087679	-0.00528186	0.00588331	0.00214664	-0.00549054	0.00403866	4.52492e-05	0.0989334	-0.000373183	-0.0020654	-0.0190215	0.0182698	-0.136629	-0.013013	-8.61291e-05	-0.00272204	-0.0126389	2.49781e-06	-2.23275e-05	-0.0188959	0.00259277	1.3575e-05	0.00278565	9.34233e-09	0.00207998	4.16767e-07	0.00182915	0.000697285	0.000922248	0.000263762
CATGGATAGGCGCTTC.1	-0.00479706	-0.00130699	-0.0650899	-0.00896035	0.010796	0.00292766	0.00109021	0.00361872	-0.000264998	0.00115796	-0.00133779	-0.00368708	-0.00117592	0.00389362	-0.00374105	-0.0735618	0.0052945	1.4998e-05	0.000132985	0.00698951	-0.00319336	0.00580022	0.00213904	-0.00570725	0.00410774	2.99253e-05	0.0566991	-0.000325201	-0.00159802	-0.0107274	0.0138962	-0.0749402	-0.00619881	-6.59001e-05	-0.00272203	-0.00598061	5.34579e-07	-4.08459e-05	-0.0167387	0.00269726	1.90567e-05	-0.00101276	7.97445e-09	0.00157952	-9.91626e-07	0.00185365	0.000552639	0.0011868	0.000265962
CATGGATGTATTTCCT.1	-0.00425481	-0.00127259	-0.0480912	-0.00701906	0.00611893	0.00290818	0.00108644	0.00315977	-0.000251975	0.00116435	-0.00134281	-0.00365117	-0.00117615	0.00387138	-0.00369667	-0.0604777	0.00529581	1.51135e-05	0.000132944	0.00638796	-0.00314906	0.0057817	0.00211178	-0.005613	0.00412501	5.27538e-05	0.052761	-0.00032462	-0.00126642	-0.00877872	0.0118511	-0.0555995	-0.0056905	-6.49447e-05	-0.002722	-0.00507787	-1.4659e-06	-4.65531e-05	-0.0109818	0.00260058	2.12472e-05	-0.00106549	7.85803e-09	0.00124934	-4.57326e-06	0.00185111	0.000477001	0.0011874	0.000265963
CATGGTATCAGGGTAG.1	-0.00420129	-0.00129355	-0.0926688	-0.00208467	0.00394199	0.00301176	0.00106633	0.00344966	-0.00026739	0.00116837	-0.00123281	-0.00387387	-0.00117565	-0.00239937	-0.00374967	-0.0502249	0.00529593	1.61454e-05	0.000133296	0.0032834	-0.00319858	0.00580046	0.00210873	-0.00558223	0.00410329	9.19011e-05	0.0591197	-0.00032506	-0.00142307	-0.0103713	0.0101851	-0.0136737	-0.00645063	-6.63572e-05	-0.00271547	-0.00563893	-1.68756e-06	-3.78862e-05	-0.00225264	0.00258154	2.37487e-05	-0.000826228	8.14907e-09	0.001421	-2.46125e-06	0.00183851	0.000445902	0.00118583	0.000265947
CATTCATAGAACTCCT.1	-0.00336714	-0.00125909	-0.0419085	0.000216732	-0.000785967	0.00290624	0.00107351	0.00551846	-0.000249331	0.00117392	-0.00133243	-0.00362962	-0.00117616	-0.00115601	-0.00368157	-0.0241585	0.00529674	1.4592e-05	0.000133188	0.00252009	-0.00310872	0.0057697	0.00207932	-0.00556695	0.00413672	0.000129787	0.00886531	-0.000324426	-0.00107946	-0.00657967	0.0071649	0.0188112	-0.00720412	-6.47003e-05	-0.002722	-0.00285356	-3.48128e-06	-5.13811e-05	0.00174883	0.00255562	2.8193e-05	-0.00105253	8.14907e-09	0.001078	-1.22199e-05	0.00185658	0.000411078	0.00118744	0.000265963
CATTTCACACACCGAC.1	-0.0144347	-7.12508e-05	-0.0644395	0.000866369	0.010722	0.0029263	0.0011127	0.00749349	-0.000285679	0.00827918	-0.00139827	-0.00550327	-0.00117423	-0.00673354	-0.00797881	-0.038527	0.00529483	1.62199e-05	0.000134027	-0.00334189	-0.00438481	0.00588245	0.00229238	-0.00544058	0.00404613	7.88011e-05	0.0867234	-0.000356255	-0.00161053	-0.0133441	0.0143572	-0.15262	-0.00959608	-8.25446e-05	-0.00272242	-0.0101822	4.71342e-06	-3.88175e-05	-0.0104485	0.0025603	1.44709e-05	0.00163937	8.44011e-09	0.00161309	-1.06404e-07	0.0018494	0.000476912	0.00109189	0.000265695
CATTTCATCTAGAGCT.1	-0.00363292	-0.00127072	-0.0428314	-0.00342106	0.00482809	0.00291714	0.00108319	0.00569112	-0.000249139	0.00116967	-0.00133091	-0.00358318	-0.00117615	0.00129934	-0.00368051	-0.0381893	0.00529598	1.46069e-05	0.000133004	0.00379857	-0.0031238	0.0057798	0.00208168	-0.00559041	0.0041269	7.18944e-05	0.0331711	-0.000324478	-0.0011066	-0.00769429	0.00939282	-0.0295871	-0.00586029	-6.43379e-05	-0.00272233	-0.00473717	5.09992e-06	-4.84865e-05	-0.00727639	0.0025773	2.39871e-05	-0.00109432	8.14907e-09	0.00109639	-1.01894e-05	0.0018477	0.000514179	0.00118758	0.00026585
CCAATGACACTACCCT.1	-0.00376485	-0.00130213	-0.0390185	-0.00951491	0.00555818	0.00293831	0.00108765	0.00588881	-0.000249959	0.00116756	-0.0013393	-0.00358816	-0.00117614	0.00696327	-0.00370825	-0.0430369	0.00529618	1.57095e-05	0.000132989	0.00543831	-0.00312988	0.00578504	0.00211043	-0.00560184	0.00412226	5.24055e-05	0.0352679	-0.000324717	-0.00114749	-0.00812106	0.010436	-0.0472549	-0.00581617	-6.47042e-05	-0.00272247	-0.00530663	5.30481e-06	-4.76223e-05	-0.0106682	0.0025884	2.22288e-05	-0.00108761	8.14907e-09	0.00113454	-8.76258e-06	0.00185165	0.000570163	0.00118728	0.000265947
CCAATGAGTAACTGCT.1	-0.0160922	0.00219463	-0.0647987	-0.00254431	0.0230087	0.00310144	0.00124223	-0.00175817	-0.000297486	0.00154788	-0.00144819	-0.00408914	-0.00103672	-0.0142478	-0.00601483	-0.0194202	0.00511728	2.9467e-05	0.000134241	-0.00378532	-0.00729255	0.0059186	0.00231346	-0.00545785	0.00403253	1.91927e-05	0.09352	-0.000359436	-0.00230076	-0.0226629	0.0296138	-0.127385	-0.0157691	-9.6688e-05	-0.00272552	-0.0232922	6.55837e-06	-2.29944e-05	-0.020786	0.00263587	1.23642e-05	0.0052188	1.30385e-08	0.00231453	6.19539e-06	0.00179112	0.00186533	0.00105347	0.000254087
CCAATGATCCAACTGA.1	-0.00500344	-0.00132146	-0.0750182	-0.0108438	0.0106653	0.00294377	0.00108663	0.00375292	-0.000270153	0.00115584	-0.00132646	-0.00372789	-0.00117594	0.0048641	-0.00378392	-0.0785502	0.00529392	1.52923e-05	0.000133099	0.00745833	-0.00320359	0.00581102	0.00215785	-0.00573719	0.00409759	2.53096e-05	0.0628612	-0.000325328	-0.00174722	-0.0116851	0.0144853	-0.0787472	-0.00626174	-6.66033e-05	-0.00272203	-0.00590947	1.58139e-06	-3.65581e-05	-0.0167004	0.00272886	1.82297e-05	-0.000833731	8.09086e-09	0.0017301	-4.32832e-07	0.00185252	0.000552937	0.00118708	0.00026596
CCAATTTCAGACCAGA.1	-0.00378871	-0.0013916	-0.051513	-0.00690842	0.00792195	0.00303693	0.00109634	0.00444714	-0.00025072	0.00116743	-0.00129686	-0.00360569	-0.00117608	0.00424771	-0.00368087	-0.0545023	0.00529655	1.45696e-05	0.00013298	0.00470778	-0.00316563	0.00579479	0.00211628	-0.00559378	0.0041128	5.38882e-05	0.0383227	-0.000324918	-0.00116413	-0.00822766	0.0119932	-0.0402301	-0.00595767	-6.49064e-05	-0.002722	-0.00396782	1.42865e-06	-4.92912e-05	-0.0132353	0.00258041	2.19233e-05	-0.00112695	8.11997e-09	0.00115032	-7.55908e-06	0.0018489	0.000517175	0.00118756	0.000265822
CCAATTTTCTTGCGCT.1	-0.0336835	0.0062663	0.00164384	-0.00398429	0.0125035	0.00356792	0.00135143	0.000176372	-0.000362793	0.00334666	-0.0010765	-0.00449634	-0.000872031	-0.0226488	-0.0175023	0.00471481	0.00492672	2.62037e-05	0.000137644	-0.00398298	-0.0124155	0.00611872	0.00347798	-0.00493695	0.00394772	1.74225e-05	0.0263022	-0.00042451	-0.00358526	-0.03218	0.0447993	-0.0403278	-0.0231224	-0.000144821	-0.00272331	-0.029196	0.000119448	-7.10972e-06	-0.00292569	0.00269569	7.79144e-06	0.0138638	2.42726e-08	0.0035486	7.95498e-05	0.00173472	0.00287571	0.000581187	0.00024816
CCACAAAGTTAACCTG.1	-0.00392443	-0.00127501	-0.0355879	-0.0111704	0.00451028	0.00292541	0.00108788	0.00628461	-0.000250784	0.00116599	-0.00134401	-0.00361194	-0.00117613	0.00845989	-0.00371501	-0.0460616	0.00529608	1.52774e-05	0.000132984	0.00555725	-0.00314551	0.00578407	0.00212964	-0.00560559	0.00412285	5.26961e-05	0.039099	-0.000324799	-0.0011831	-0.00830203	0.010753	-0.0521276	-0.00565927	-6.49063e-05	-0.00272212	-0.00536922	3.65265e-06	-4.79836e-05	-0.0103437	0.00259259	2.16495e-05	-0.00107528	8.11997e-09	0.00116864	-8.00798e-06	0.00184947	0.000546604	0.00118744	0.000265963
CCACAAATCTGGGAGA.1	-0.0053645	-0.00118536	-0.0310755	-0.00581713	0.0154462	0.00292806	0.00110619	0.0027926	-0.000252457	0.00115503	-0.00133959	-0.00368652	-0.0011761	0.00118933	-0.0037179	-0.0745823	0.00529495	1.47186e-05	0.00013293	0.00666133	-0.00331322	0.0057983	0.00217343	-0.00564842	0.00410976	2.87276e-05	0.0693822	-0.000324992	-0.00141494	-0.0102674	0.0152475	-0.0856166	-0.00421479	-6.53998e-05	-0.00272201	-0.00709179	-7.0408e-07	-4.23938e-05	-0.0206851	0.00264146	1.69855e-05	-0.00113713	6.63567e-09	0.00139749	-3.2864e-06	0.00185243	0.000556275	0.00118745	0.000265954
CCACACTCAGGTGACA.1	-0.00713936	-0.00189217	-0.036977	-0.0162643	0.0156041	0.00348132	0.00156218	0.0045092	-0.000266644	0.00113838	-0.00129931	-0.00345291	-0.00117609	0.009036	-0.00377408	-0.14664	0.00529315	1.50613e-05	0.000132993	0.0246611	-0.00344585	0.00584269	0.00271857	-0.00587092	0.00406555	4.43496e-06	0.0304213	-0.000326125	-0.0017828	-0.0121935	0.0206351	-0.100509	-0.0081793	-6.77732e-05	-0.00272222	-0.00987291	2.23331e-06	-2.76845e-05	-0.0416267	0.00286565	1.30842e-05	-0.00168085	4.19095e-09	0.00177832	-8.28411e-07	0.00186937	0.00100885	0.00118748	0.000265591
CCACACTGTACAGTTC.1	-0.0238383	0.00517508	-0.00449222	-0.000980732	0.0203729	0.00298214	0.00116344	0.00837639	-0.000298304	0.00386936	-0.00139967	-0.00565037	-0.00116768	-0.0135904	-0.0285821	-0.00154296	0.00528065	1.96248e-05	0.000136236	-0.00311121	-0.00992379	0.00593165	0.0038771	-0.00500415	0.00403112	2.39536e-05	0.0790841	-0.000405801	-0.00228839	-0.0220413	0.0249787	-0.195862	-0.011692	-0.000105958	-0.00272496	-0.0167191	0.00065282	-7.52322e-06	-0.0242736	0.00260366	1.19573e-05	0.00532195	1.12923e-08	0.0023519	2.6254e-06	0.00184012	0.00078012	0.000241484	0.000263454
CCACACTTCAGTGATC.1	-0.00694339	-0.00138835	-0.0946801	-0.0240809	0.0243849	0.00299488	0.00108305	0.00139931	-0.000276247	0.00114332	-0.00132549	-0.003726	-0.0011747	0.0154012	-0.00381246	-0.0690986	0.00529182	1.56984e-05	0.000133015	0.0075247	-0.00326918	0.00584881	0.00218139	-0.00581561	0.00406326	1.11739e-05	0.0620584	-0.00032836	-0.0019007	-0.0143794	0.0198179	-0.10794	-0.00653286	-6.91549e-05	-0.002722	-0.00691286	4.20585e-06	-3.03686e-05	-0.0302719	0.00280569	1.65235e-05	-0.00059789	8.11997e-09	0.0018875	8.49832e-09	0.00184815	0.000563011	0.00118706	0.000265962
CCACACTTCCGCACGA.1	-0.00411643	-0.00126305	-0.0540015	-0.00718066	0.00498855	0.00291342	0.00107745	0.00398844	-0.000257555	0.00116581	-0.00133865	-0.00368343	-0.00117588	0.00404321	-0.00370394	-0.0474082	0.00529577	1.44616e-05	0.000133002	0.00595896	-0.00314681	0.0057843	0.00217935	-0.00560087	0.00412139	5.71944e-05	0.0509981	-0.000324627	-0.00125306	-0.00880373	0.0112589	-0.0481855	-0.00549583	-6.47685e-05	-0.00272203	-0.0052205	1.92784e-06	-4.57466e-05	-0.00948131	0.00258895	2.25157e-05	-0.00102417	8.11997e-09	0.00123628	-6.12298e-06	0.00183756	0.000496119	0.00118741	0.000265963
CCACCATAGATTGTGA.1	-0.0033331	-0.0012665	-0.029897	-0.000261688	-0.00127472	0.00290409	0.00107911	0.00582839	-0.000247937	0.00117455	-0.00133139	-0.00358545	-0.00117548	-0.000449324	-0.00366532	-0.0226452	0.0052961	1.45324e-05	0.00013309	0.00282179	-0.00310389	0.00576565	0.00208049	-0.00556754	0.00413937	0.000127885	0.00189107	-0.000324337	-0.00101614	-0.00630024	0.0069061	0.0198214	-0.00709403	-6.38929e-05	-0.00272192	-0.00279205	-3.70853e-06	-5.15394e-05	0.00168395	0.00255586	2.87034e-05	-0.00108591	8.14907e-09	0.001015	-1.4235e-05	0.00185721	0.000413224	0.00118823	0.000265963
CCACGAGCATCGGAAG.1	-0.0032469	-0.00126147	-0.032529	0.000748611	-0.000287401	0.00290626	0.00107252	0.00602226	-0.000249163	0.00117437	-0.00133765	-0.00364073	-0.00117615	-0.00169487	-0.00366653	-0.0147442	0.00529686	1.44839e-05	0.000133026	0.00214837	-0.0030965	0.00576434	0.00208225	-0.00557402	0.00414024	0.000132194	0.0190619	-0.000324344	-0.00106005	-0.00659513	0.00691095	0.0184609	-0.00679375	-6.38508e-05	-0.002722	-0.00312281	-4.0587e-06	-4.94458e-05	0.000522375	0.00256147	2.86996e-05	-0.00108785	8.14907e-09	0.00105759	-1.4049e-05	0.00185643	0.000415236	0.00118751	0.000265963
CCACGTTCATTGAGCT.1	-0.00502893	-0.00138318	-0.0506235	-0.0113854	0.0143127	0.0029967	0.00110121	0.00376138	-0.000259332	0.00116246	-0.00133791	-0.0035903	-0.00117528	0.00716655	-0.0037153	-0.077662	0.00529463	1.45137e-05	0.000132993	0.00787474	-0.0031966	0.00579452	0.00210488	-0.00575683	0.00411244	2.97967e-05	0.0443015	-0.000324799	-0.00143796	-0.00976751	0.0132777	-0.0637546	-0.00761155	-6.52006e-05	-0.002722	-0.00595042	-2.30037e-06	-4.2079e-05	-0.0216884	0.0027445	2.01203e-05	-0.00117532	7.68341e-09	0.00141774	-1.25961e-06	0.00185259	0.00064221	0.00118697	0.000265962
CCACGTTTCAAGTAAG.1	-0.00741559	-0.0016266	-0.0765316	-0.00408254	0.0121302	0.00321933	0.00110167	0.00148551	-0.00029594	0.00113341	-0.000914088	-0.00396804	-0.00116555	-0.00771395	-0.00413913	-0.0277262	0.00527181	3.46175e-05	0.000132471	0.00156974	-0.00334745	0.00588986	0.00335246	-0.00549705	0.0040502	3.70741e-05	0.0766147	-0.000328293	-0.0022024	-0.0178155	0.0212867	-0.0754507	-0.0111463	-8.0042e-05	-0.00272295	-0.0127436	5.20423e-06	-3.08678e-05	-0.0100741	0.00260507	1.39084e-05	0.00196693	1.60653e-08	0.00218291	6.8685e-09	0.00183801	0.000583723	0.00117169	0.000261249
CCATAAGAGCATTTCG.1	-0.0426837	0.00303935	0.0259461	-0.00532319	0.00910325	0.00452264	0.00138685	0.00792668	-0.000700168	0.00311926	-0.00118	-0.00414645	-0.000365786	-0.0306273	-0.0152294	0.00909206	0.00425036	5.00418e-05	0.000136079	-0.00944876	-0.0113327	0.00675626	0.00411143	-0.00489184	0.00339289	-0.000109332	-0.0243947	-0.000466203	-0.00500432	-0.0399176	0.0670515	0.15203	-0.0324002	-0.000178055	-0.00272195	-0.0450704	0.00499061	7.47219e-05	-0.0205266	0.00279294	-1.2327e-05	0.0115678	2.07685e-07	0.00484347	0.000313699	0.00172052	0.00384709	0.000677309	0.000200067
CCATAAGGTAGATTAG.1	-0.00949619	-0.000610788	-0.0999497	0.000109868	0.0134441	0.00292102	0.00111637	0.00650407	-0.000282512	0.0014352	-0.00136249	-0.00428308	-0.00116118	-0.00807254	-0.00477134	-0.0280711	0.00527909	1.48825e-05	0.000134051	-0.00223639	-0.00389979	0.00584717	0.00215119	-0.00551973	0.0040713	7.15964e-05	0.0996853	-0.00034569	-0.00171637	-0.0142074	0.0128572	-0.0946727	-0.00856484	-7.56825e-05	-0.002722	-0.00859407	5.96326e-06	-3.68562e-05	-0.0119919	0.00257858	1.74139e-05	0.000666898	8.17818e-09	0.00171677	-1.94646e-07	0.00183996	0.000487953	0.00112656	0.000265073
CCATAAGGTCGTTATG.1	-0.00331714	-0.00126518	-0.0280896	-0.00206664	-0.00147752	0.00290374	0.00107721	0.00561463	-0.000248238	0.00117422	-0.00132938	-0.00358624	-0.00117592	0.00127836	-0.00366473	-0.0275567	0.00529644	1.44839e-05	0.000133088	0.00304047	-0.00310055	0.00574917	0.0020813	-0.00556974	0.00413961	0.000124767	0.00113461	-0.000324322	-0.00103439	-0.00637956	0.00708295	0.0185987	-0.00711556	-6.39533e-05	-0.00270555	-0.00280704	-3.74392e-06	-5.13475e-05	0.00157931	0.00255731	2.84612e-05	-0.00108059	8.14907e-09	0.00103241	-1.36839e-05	0.00185466	0.000413194	0.0011896	0.000265963
CCATCACAGGGTTTCT.1	-0.00338854	-0.0012555	-0.052062	-0.000852524	-0.000463103	0.00291114	0.00106772	0.00463927	-0.000255552	0.00117247	-0.00132638	-0.00369836	-0.00117613	-0.0010868	-0.00367774	-0.0309178	0.00529654	1.47894e-05	0.000132969	0.00350111	-0.00310454	0.00577265	0.00208866	-0.00558077	0.00413028	0.000115583	0.0358751	-0.000324568	-0.00115975	-0.00763647	0.00830363	0.00420958	-0.00724275	-6.47717e-05	-0.00271637	-0.0029096	-3.64147e-06	-4.81643e-05	0.000285	0.00257088	2.7068e-05	-0.00103454	8.14907e-09	0.00115503	-9.31974e-06	0.00183735	0.00041467	0.00118752	0.00026596
CCATCACGTATATGGA.1	-0.00605629	-0.00137342	-0.0571267	-0.0189702	0.0190525	0.00298317	0.00109912	0.00442784	-0.00025897	0.00115954	-0.00133922	-0.00357253	-0.00117332	0.014387	-0.00373044	-0.086931	0.00529266	1.4443e-05	0.00013303	0.00917584	-0.00320219	0.00580508	0.00211603	-0.00578003	0.00410199	2.47732e-05	0.0438843	-0.000324724	-0.00143429	-0.0101043	0.0139861	-0.0786671	-0.00836352	-6.52257e-05	-0.002722	-0.00643095	-2.29292e-06	-4.00003e-05	-0.0295624	0.00276732	1.90884e-05	-0.00120398	7.79983e-09	0.00141109	-9.70438e-07	0.00184873	0.000677824	0.0011872	0.000265952
CCCAACTTCCACGGGT.1	-0.0181349	0.00126649	-0.0391099	0.000707594	0.0127677	0.00294245	0.00113736	0.00786788	-0.000294487	0.00611126	-0.00139915	-0.00594986	-0.00117327	-0.00833218	-0.0158604	-0.0405922	0.00529188	1.63615e-05	0.000134541	-0.00163867	-0.00579383	0.00590931	0.00281227	-0.00538045	0.00403584	5.58198e-05	0.0816705	-0.0003876	-0.00175928	-0.0155352	0.0169917	-0.197299	-0.00865772	-9.42941e-05	-0.00272319	-0.00960937	6.04225e-06	-3.12496e-05	-0.0172955	0.00256801	1.23447e-05	0.00260509	8.64384e-09	0.00176797	1.93249e-08	0.00184657	0.000560373	0.000905244	0.000265067
CCCATTGCACTGATTG.1	-0.00399199	-0.00132645	-0.0441453	-0.00643796	0.00776604	0.00295543	0.00109618	0.00262861	-0.000253618	0.00116773	-0.00133517	-0.00362138	-0.00117614	0.00364303	-0.00368628	-0.0691305	0.00529594	1.45882e-05	0.000132972	0.00551893	-0.00315728	0.00578208	0.00208408	-0.00568643	0.00412311	5.22993e-05	0.0387938	-0.000324501	-0.0012281	-0.00838875	0.0119008	-0.0383411	-0.00706668	-6.45455e-05	-0.002722	-0.00463143	-3.04915e-06	-4.43496e-05	-0.011943	0.00267343	2.28174e-05	-0.00110708	7.79983e-09	0.00121323	-3.22843e-06	0.00185025	0.000489294	0.00118744	0.000265963
CCCATTGCATACAGCT.1	-0.0353803	0.00731926	0.0306741	-0.00381072	0.0104425	0.00407893	0.00131969	0.00277854	-0.000507791	0.00208482	-0.00109616	-0.00400485	-0.000792312	-0.0269682	-0.0136653	0.0074394	0.00479189	3.34894e-05	0.000137264	-0.00914063	-0.0143497	0.00622243	0.00484037	-0.0048497	0.00384234	-1.17314e-05	0.0101048	-0.000429099	-0.00389554	-0.0354575	0.0537921	0.0429788	-0.0237177	-0.000171189	-0.00272191	-0.0370547	0.000128988	-1.42399e-06	-0.00325021	0.00269686	1.74344e-06	0.0109616	4.19095e-08	0.00385173	0.000120399	0.00167467	0.00320536	0.000781497	0.000235969
CCCATTGTCCTTCTAA.1	-0.00370681	-0.00146949	-0.0515503	-0.00522511	0.00783897	0.00310286	0.00109167	0.00460121	-0.000250394	0.00116879	-0.00129436	-0.00362635	-0.00117608	0.00276377	-0.00367456	-0.0621438	0.00529663	1.44728e-05	0.000132991	0.0035583	-0.00315378	0.00579134	0.00213762	-0.00558896	0.00411583	5.9668e-05	0.0353385	-0.000324858	-0.00115312	-0.00805538	0.0113938	-0.029887	-0.00608714	-6.46976e-05	-0.002722	-0.00385234	1.40443e-06	-4.88684e-05	-0.0117025	0.00257558	2.30893e-05	-0.00112586	8.14907e-09	0.00114211	-8.63941e-06	0.0018558	0.000495821	0.00118753	0.000265803
CCCGAAGAGTCTCTGA.1	-0.00476102	-0.00130825	-0.0774012	-0.00691162	0.00856992	0.00299358	0.00107143	0.0036613	-0.000271712	0.00116253	-0.00125807	-0.00378911	-0.00117599	0.00146982	-0.00377706	-0.071044	0.00529449	1.61044e-05	0.000133278	0.00578776	-0.00322098	0.00581418	0.00213328	-0.00560975	0.00409268	5.21299e-05	0.0498726	-0.000325104	-0.00157953	-0.0112548	0.0116058	-0.0316059	-0.00623145	-6.6115e-05	-0.00272061	-0.00571612	-9.81614e-07	-3.3671e-05	-0.00743791	0.00261401	2.05599e-05	-0.00107308	8.14907e-09	0.00156931	-8.79168e-07	0.00185116	0.000473678	0.0011855	0.00026595
CCCGAAGCATCGGCCA.1	-0.0181079	0.000427149	-0.0501609	0.000697424	0.0116908	0.00295663	0.00113866	0.00702666	-0.000293373	0.00535913	-0.00139139	-0.00575076	-0.00117162	-0.00847734	-0.012757	-0.042547	0.00528871	1.60635e-05	0.000134617	-0.000502754	-0.00498231	0.00590306	0.00275983	-0.00541276	0.00403689	5.71199e-05	0.0822386	-0.000385804	-0.00176138	-0.0154933	0.0166533	-0.176776	-0.00905092	-9.14526e-05	-0.00272309	-0.00988725	5.9153e-06	-3.17413e-05	-0.015723	0.00257261	1.25142e-05	0.00249681	8.67294e-09	0.00177094	1.62981e-08	0.00184785	0.0005503	0.000976413	0.000264635
CCCGGAAAGCTGGCCT.1	-0.00364258	-0.00122791	-0.0596712	0.000650066	-0.000222608	0.00290707	0.00107947	0.00510979	-0.000254347	0.00117829	-0.00132985	-0.00372288	-0.0011759	-0.0021868	-0.00371485	-0.0301299	0.00529639	1.49682e-05	0.000133242	0.00258254	-0.00313984	0.00577878	0.00208174	-0.00556402	0.00412961	0.000126308	0.0289148	-0.00032535	-0.00114542	-0.00725992	0.00774686	0.0102775	-0.0070424	-6.58422e-05	-0.00272191	-0.00323176	-3.23728e-06	-5.00679e-05	0.00155404	0.0025586	2.74777e-05	-0.00096608	8.14907e-09	0.0011456	-9.95654e-06	0.00185194	0.000415221	0.00118619	0.000265941
CCCGGAATCGTAACCA.1	-0.00331536	-0.00126181	-0.0294846	-0.000247248	-0.000787046	0.00290399	0.00107236	0.00581778	-0.000248186	0.00117414	-0.00133026	-0.00359612	-0.00117616	-0.000564655	-0.00366729	-0.0202821	0.00529677	1.45435e-05	0.000133069	0.00275093	-0.00309352	0.00576616	0.00208136	-0.00557314	0.00413903	0.000126759	0.00739563	-0.000324367	-0.00102874	-0.00641388	0.00697773	0.01664	-0.00697652	-6.40128e-05	-0.00272197	-0.00287028	-3.9544e-06	-5.11501e-05	0.0010002	0.00256032	2.83271e-05	-0.00108396	8.14907e-09	0.00102765	-1.35349e-05	0.00185349	0.000414491	0.00118885	0.000265963
CCCTAACCACCAGCTG.1	-0.0034047	-0.00125853	-0.0592266	-0.000904841	-0.000134805	0.00291629	0.00107389	0.00438738	-0.000256852	0.00117203	-0.00132546	-0.00372818	-0.00117612	-0.00119665	-0.00369528	-0.0316038	0.00529657	1.63913e-05	0.000132922	0.00366627	-0.00310897	0.00577919	0.00208951	-0.00558498	0.00412901	0.000113759	0.0397629	-0.000324717	-0.00116146	-0.00782468	0.00872184	-0.00283921	-0.00701256	-6.54983e-05	-0.0027217	-0.00321433	-2.64496e-06	-4.63445e-05	-0.000216365	0.00257495	2.64794e-05	-0.000939865	8.14907e-09	0.00115645	-8.9712e-06	0.00183672	0.000421837	0.00118755	0.00026596
CCCTAACTCCCATTCG.1	-0.0239114	0.000610872	-0.0421149	-0.00451559	0.0248045	0.00323854	0.00127504	-0.00100291	-0.000298742	0.00169574	-0.00138622	-0.00401359	-0.000830309	-0.0148752	-0.0104377	-0.0173323	0.00492651	2.21953e-05	0.000136644	-0.000694796	-0.00605632	0.00593211	0.00266172	-0.00536984	0.00402536	1.41701e-05	0.0431357	-0.000388248	-0.00269894	-0.025043	0.0320949	-0.0978867	-0.0177304	-0.000109301	-0.00272582	-0.0199842	7.91717e-06	-1.37524e-05	-0.0181528	0.00273783	1.20422e-05	0.0107637	1.23691e-08	0.00264044	1.5947e-05	0.00178502	0.00175436	0.000774264	0.000258848
CCCTCAACACAGTGTT.1	-0.00530764	-0.00129317	-0.102226	-0.00137645	0.00878618	0.00300574	0.00109056	0.00175775	-0.000281055	0.0011597	-0.00114547	-0.00400824	-0.00117439	-0.00554438	-0.00401847	-0.0358704	0.00529323	2.47303e-05	0.000133475	0.00212687	-0.00329425	0.00583999	0.00217054	-0.0055446	0.004084	7.17901e-05	0.0823127	-0.000326036	-0.00166481	-0.0129488	0.0132954	-0.0378127	-0.0086932	-7.18781e-05	-0.00272288	-0.00722092	1.01514e-06	-3.9991e-05	-0.00306633	0.0025802	2.083e-05	0.00049952	1.00117e-08	0.0016647	-7.39237e-07	0.00182272	0.000479564	0.00117911	0.000265151
CCCTCTCCACGGTGAA.1	-0.0194175	0.000497812	-0.0344158	-0.00276977	0.0219532	0.00301999	0.00117763	0.00364776	-0.000297957	0.00192621	-0.00146027	-0.00473689	-0.00104134	-0.0109079	-0.00992421	-0.0278311	0.00515007	2.57045e-05	0.000135196	-0.00160485	-0.00537769	0.00595801	0.00250483	-0.00540099	0.00403041	2.82153e-05	0.0611943	-0.000382362	-0.00213181	-0.0202867	0.0219303	-0.126887	-0.0117359	-9.91833e-05	-0.00274154	-0.0110657	3.41609e-06	-2.11298e-05	-0.00975004	0.00260594	1.22115e-05	0.00723155	1.30385e-08	0.00209148	1.7425e-06	0.00177377	0.00094588	0.000865109	0.000263406
CCCTCTCTCCGTAGTA.1	-0.00390604	-0.00127599	-0.0485113	-0.00620551	0.00449841	0.00290681	0.00110224	0.00338077	-0.000252742	0.00116853	-0.00133653	-0.0035921	-0.00117563	0.00392955	-0.0036811	-0.0714431	0.00529553	1.44988e-05	0.000132993	0.0050322	-0.00315827	0.00577911	0.00210419	-0.00561281	0.00412612	6.30822e-05	0.0335077	-0.000324352	-0.00117085	-0.00784161	0.0104711	-0.0307752	-0.00704042	-6.43606e-05	-0.002722	-0.00384575	-2.53879e-06	-4.73186e-05	-0.00778565	0.00259959	2.33166e-05	-0.00106328	7.97445e-09	0.00115829	-4.96278e-06	0.00185339	0.000464171	0.00118756	0.000265963
CCCTGATCACGGAAGT.1	-0.00893072	-0.00067122	-0.0954194	0.000170705	0.00980044	0.00291223	0.00111509	0.00664395	-0.00027557	0.00130012	-0.00138656	-0.00434742	-0.00115938	-0.00711615	-0.0044829	-0.0341232	0.00527915	1.45435e-05	0.000133805	-0.00119801	-0.00379333	0.00583993	0.00210461	-0.00553854	0.0040754	8.29119e-05	0.0970724	-0.00034537	-0.00168601	-0.013261	0.0116495	-0.0823287	-0.00946174	-7.4321e-05	-0.002722	-0.00803748	5.62798e-06	-3.87412e-05	-0.00911829	0.00256888	1.83936e-05	-0.000237964	8.17818e-09	0.00168609	-3.44589e-07	0.00185	0.000465721	0.00114737	0.000265686
CCCTGATCAGTGTATC.1	-0.00799498	-0.000993325	-0.0995993	0.000933315	0.00683485	0.00292825	0.00110346	0.00330619	-0.000281453	0.00178684	-0.00132898	-0.00462343	-0.00113694	-0.00496972	-0.00549638	-0.050468	0.0052532	1.44504e-05	0.000134289	0.00334722	-0.00346118	0.00581769	0.00258486	-0.00549665	0.00409593	0.000100393	0.0761892	-0.000341853	-0.00141736	-0.0106336	0.0122296	-0.0866672	-0.00823944	-7.03533e-05	-0.00272331	-0.0071342	-1.97068e-06	-4.31649e-05	-0.00861549	0.00255765	1.92802e-05	-0.000243519	8.14907e-09	0.00141718	-5.69387e-06	0.00185403	0.000437587	0.00115252	0.000264302
CCCTTAGGTGAGATTA.1	-0.00347454	-0.00124352	-0.0382007	-0.000164661	0.00358452	0.00291066	0.00108177	0.00555069	-0.000248482	0.00117133	-0.00133267	-0.00358558	-0.00117616	-0.0014303	-0.00366643	-0.0295305	0.00529656	1.4443e-05	0.000133026	0.00326516	-0.00313267	0.00576883	0.00207935	-0.00557758	0.00413639	9.79882e-05	0.0250499	-0.000324277	-0.00107656	-0.00717724	0.0080748	-0.00242966	-0.00629636	-6.39748e-05	-0.002722	-0.00427224	-1.05612e-06	-4.84251e-05	-0.00486204	0.00256443	2.60621e-05	-0.00109801	8.14907e-09	0.00107141	-1.22311e-05	0.00184519	0.000473931	0.00118761	0.000265924
CCGAACGCACCCTAAA.1	-0.00421187	-0.00125792	-0.0475685	-0.00838172	0.00438315	0.00291066	0.00108514	0.00449252	-0.000253331	0.00116466	-0.00134442	-0.00365729	-0.00117611	0.00527161	-0.00370717	-0.0512742	0.00529585	1.47223e-05	0.000132963	0.00609073	-0.0031593	0.00578228	0.0021424	-0.00559975	0.00412419	5.5233e-05	0.0501308	-0.000324747	-0.00124299	-0.00874719	0.0112787	-0.0522526	-0.00540665	-6.49181e-05	-0.00272201	-0.00525776	9.51812e-07	-4.74881e-05	-0.00938967	0.00258725	2.18116e-05	-0.00105844	8.09086e-09	0.00122648	-5.85476e-06	0.00184936	0.00050424	0.00118738	0.000265963
CCGATGGCAGTGCGCT.1	-0.0109887	-0.000424432	-0.108612	-0.000605462	0.0189326	0.00298022	0.00115141	0.00256254	-0.000292989	0.00129256	-0.0014392	-0.00425516	-0.00107811	-0.0108599	-0.00441837	-0.0365152	0.00518815	2.2456e-05	0.000133526	-0.0020012	-0.00426308	0.00587591	0.00249236	-0.00553153	0.00404569	5.16493e-05	0.110691	-0.000348715	-0.00190533	-0.0176613	0.0194416	-0.110661	-0.0114627	-8.16353e-05	-0.00272203	-0.0142023	6.06116e-06	-3.0227e-05	-0.0183304	0.00258295	1.54972e-05	0.00162886	1.00117e-08	0.00191063	4.47035e-08	0.00181294	0.000982285	0.00113893	0.000262627
CCGATGGGTGACTCGC.1	-0.0231803	-1.85152e-05	-0.0220583	-0.00551531	0.0296347	0.00399204	0.0012628	0.00269273	-0.000302935	0.00135129	-0.00122813	-0.00364059	-0.00095488	-0.0172005	-0.00632807	-0.00716859	0.00502484	2.9875e-05	0.000135848	-0.00845241	-0.00631432	0.00595074	0.00287893	-0.00536805	0.00401715	1.15046e-05	0.0459375	-0.000379978	-0.00302257	-0.0278599	0.0393354	-0.0267835	-0.0142554	-0.000124367	-0.00272411	-0.0328038	8.44337e-06	-1.3147e-05	-0.0275402	0.00277725	1.20057e-05	0.0063022	1.35333e-08	0.0028748	2.63278e-05	0.00180648	0.00211066	0.00103909	0.000250738
CCGCAAGAGGGATCTG.1	-0.00815428	-0.00146176	-0.077277	-0.00556925	0.0167811	0.00316154	0.0011309	-0.0064427	-0.000296589	0.00112438	-0.00112742	-0.00380027	-0.00116576	-0.00986919	-0.00400516	-0.0350614	0.00526565	3.15383e-05	0.000133047	0.00152048	-0.00359492	0.00591516	0.00228517	-0.00558089	0.00404339	2.42311e-05	0.0789862	-0.000338247	-0.00262902	-0.0212455	0.0324411	-0.100012	-0.0112388	-8.80437e-05	-0.00272206	-0.0163698	7.78213e-06	-1.82502e-05	-0.0186978	0.00269823	1.30869e-05	0.00161078	1.18744e-08	0.00257816	1.18813e-06	0.00184199	0.000833154	0.00117187	0.000261519
CCGCAAGCAGTTGTCA.1	-0.010243	0.00026438	-0.0802305	0.0013094	0.0104706	0.00293086	0.00111111	0.00617741	-0.000280339	0.00411189	-0.0013426	-0.00509723	-0.00117454	-0.00675677	-0.00608944	-0.0306249	0.00529395	1.50204e-05	0.000134217	-0.00168823	-0.00470351	0.0058564	0.00223441	-0.00547421	0.00406628	9.36091e-05	0.0870319	-0.000343909	-0.00153397	-0.0125183	0.0122546	-0.10739	-0.00862324	-7.66392e-05	-0.00272334	-0.00889552	2.4125e-05	-4.43868e-05	-0.00935307	0.00256255	1.69445e-05	0.00055315	8.3819e-09	0.00153444	-7.96048e-07	0.00184444	0.000455096	0.00111879	0.000265514
CCGCAAGGTTGTACGT.1	-0.00485053	-0.00117079	-0.0988215	-0.000637572	0.00658431	0.00297958	0.00108947	0.00267942	-0.000273375	0.00116618	-0.00120442	-0.00398256	-0.0011742	-0.00462035	-0.00395377	-0.0480259	0.00529367	1.80975e-05	0.000133688	0.00246628	-0.0033394	0.00582268	0.002148	-0.00555748	0.00409379	8.45753e-05	0.0726796	-0.000326252	-0.00148555	-0.0112378	0.0113635	-0.0335043	-0.00876222	-6.98518e-05	-0.00272201	-0.00582901	-3.241e-07	-4.10471e-05	-0.00239429	0.00258747	2.28658e-05	-9.05618e-06	9.08039e-09	0.001485	-1.95974e-06	0.00180649	0.00045605	0.00118034	0.000265451
CCGCAAGTCCCTTTGG.1	-0.0084446	-0.00173075	-0.0718434	-0.0101776	0.0128986	0.0033057	0.0011057	-0.00347152	-0.000296477	0.0010997	-0.00125781	-0.00397682	-0.00116147	-0.00519378	-0.00395402	-0.0460803	0.00527453	3.11974e-05	0.000132773	0.0170193	-0.00340229	0.00588814	0.00244803	-0.00574693	0.00403604	7.49063e-06	0.0502068	-0.000332011	-0.0026731	-0.0213155	0.0320542	-0.10805	-0.00795722	-7.99354e-05	-0.00271813	-0.0145097	9.33185e-06	-1.38916e-05	-0.0298774	0.00279528	1.22255e-05	0.000575068	1.13505e-08	0.00264544	1.712e-06	0.00187413	0.000813529	0.0011833	0.000265514
CCGGACACAATCTGCA.1	-0.00518074	-0.000963497	-0.0747179	0.000832914	0.00173484	0.00290704	0.00110395	0.00513168	-0.00026517	0.00120253	-0.00133284	-0.00372217	-0.00117318	-0.00322611	-0.00390911	-0.0450779	0.00529003	1.45845e-05	0.000134228	0.00269195	-0.00343168	0.00580135	0.00215997	-0.00554253	0.00410891	0.000117999	0.0419566	-0.000328576	-0.0012603	-0.00809161	0.00832389	0.0121943	-0.00655153	-6.64273e-05	-0.00272163	-0.00522572	1.06171e-07	-4.85834e-05	-0.00140631	0.00256303	2.58721e-05	-0.000823561	8.3819e-09	0.00126212	-7.69226e-06	0.00185569	0.000463262	0.00116131	0.000264682
CCGGACAGTTTGAACC.1	-0.00389139	-0.00128075	-0.0718109	-0.00664198	0.00280468	0.00291037	0.00107906	0.00373209	-0.000256572	0.00116691	-0.00133969	-0.003662	-0.00117587	0.00366346	-0.00369879	-0.0568286	0.00529586	1.45398e-05	0.000133017	0.00688671	-0.00314128	0.0057806	0.00213538	-0.00562486	0.004126	5.94128e-05	0.0452082	-0.000324575	-0.00124102	-0.00862879	0.010827	-0.0428412	-0.00596846	-6.48559e-05	-0.00272207	-0.00426123	2.40281e-07	-4.62681e-05	-0.007808	0.00261229	2.32011e-05	-0.00101689	8.09086e-09	0.0012255	-4.94579e-06	0.00185034	0.000458941	0.00118741	0.000265963
CCGGGTACAGGTGTGA.1	-0.00508917	-0.0012193	-0.0925006	-0.00128856	0.00642891	0.00297985	0.00109642	0.00276865	-0.000269212	0.00116795	-0.00124455	-0.00382838	-0.00117554	-0.00381312	-0.00391139	-0.0455119	0.00529577	1.5799e-05	0.000133933	0.00253019	-0.00330463	0.0058243	0.00211714	-0.00555125	0.00408714	7.21626e-05	0.0643707	-0.00032567	-0.00144559	-0.0109185	0.0116241	-0.0128642	-0.00726042	-6.75983e-05	-0.00272209	-0.00637078	1.21817e-06	-4.29843e-05	-0.00570759	0.00257546	2.32756e-05	-0.000408866	8.61473e-09	0.00144582	-2.34297e-06	0.00184365	0.000482783	0.00117084	0.00026577
CCGGGTACAGTCGAGA.1	-0.0187625	0.000277907	-0.0504393	-0.00038621	0.0181817	0.00291587	0.00113349	0.00695994	-0.000294971	0.00792567	-0.00141716	-0.00609326	-0.0011731	-0.007013	-0.00757227	-0.0337831	0.00529339	1.55978e-05	0.000134658	-0.00502134	-0.00473817	0.00589107	0.00225806	-0.00543569	0.00404006	6.83628e-05	0.101587	-0.000375753	-0.00170791	-0.0154602	0.0164687	-0.158823	-0.00950846	-8.837e-05	-0.00272279	-0.0113503	6.10948e-06	-3.57069e-05	-0.0165784	0.00256566	1.34949e-05	0.00190301	8.26549e-09	0.00171698	3.18978e-08	0.00184859	0.000560924	0.00103466	0.000265695
CCGGGTATCATTGTTC.1	-0.00554887	-0.00134963	-0.0587573	-0.0153605	0.0159558	0.00296302	0.00110403	0.00402451	-0.000263262	0.0011586	-0.00134173	-0.00358845	-0.00117475	0.0104799	-0.00374262	-0.0865431	0.00529375	1.45994e-05	0.000133073	0.00865052	-0.00322143	0.00580502	0.00210687	-0.00575969	0.00410315	2.36817e-05	0.046699	-0.000324985	-0.00149816	-0.0104209	0.013767	-0.077706	-0.00751527	-6.56123e-05	-0.002722	-0.00578564	-1.47149e-06	-3.91044e-05	-0.0249447	0.0027476	1.91275e-05	-0.00110912	7.91624e-09	0.00147746	-8.03033e-07	0.0018509	0.000595972	0.00118699	0.000265962
CCGGTGAAGTGGACTG.1	-0.00383565	-0.00127225	-0.0718335	-0.00491546	0.00320207	0.00291148	0.00107351	0.00360622	-0.00026039	0.00116782	-0.00133625	-0.00370919	-0.00117576	0.00176094	-0.00369894	-0.0477371	0.0052958	1.45845e-05	0.000133025	0.00580756	-0.00313578	0.00578248	0.002126	-0.00561678	0.00412356	6.78021e-05	0.0499503	-0.000324553	-0.00125742	-0.00885243	0.0106691	-0.0345779	-0.00592813	-6.4799e-05	-0.00272206	-0.00437287	1.92225e-06	-4.52139e-05	-0.00663281	0.00260489	2.39313e-05	-0.000974286	8.14907e-09	0.00124241	-5.18607e-06	0.00184571	0.000453711	0.00118751	0.000265962
CCGTAGGCACGGTGCT.1	-0.013599	0.000220619	-0.0652073	0.00109971	0.0104919	0.00291936	0.00111333	0.00735869	-0.000285605	0.00880554	-0.00137938	-0.00583578	-0.00117458	-0.00651034	-0.0076938	-0.0379883	0.00529533	1.56909e-05	0.00013417	-0.00338379	-0.00465785	0.00588406	0.00223987	-0.00546035	0.00404741	8.10772e-05	0.0909686	-0.000354266	-0.00152202	-0.0132221	0.0141042	-0.144497	-0.00993975	-8.29078e-05	-0.00272221	-0.0101746	3.58187e-06	-4.06615e-05	-0.0110393	0.00256231	1.49682e-05	0.00187088	8.44011e-09	0.00152322	-1.71131e-07	0.00184893	0.000485063	0.00110999	0.000265835
CCGTAGGGTCTAGTGT.1	-0.00354214	-0.00130588	-0.0485241	-0.00100212	0.000514014	0.00295277	0.00106815	0.00531463	-0.000255233	0.00117275	-0.0013226	-0.00368727	-0.001176	-0.000561604	-0.00371406	-0.0413777	0.00529658	1.4443e-05	0.000133345	0.00276747	-0.00311609	0.00577714	0.00208335	-0.00556718	0.00412961	0.000118943	0.0214493	-0.000324337	-0.00116289	-0.00725639	0.0075812	0.00754964	-0.00743055	-6.43774e-05	-0.00272198	-0.00338751	3.07336e-07	-4.99785e-05	-0.000565648	0.00255616	2.63937e-05	-0.00105224	8.14907e-09	0.00116148	-1.00723e-05	0.00185581	0.000414133	0.00118714	0.000265956
CCGTAGGTCATAGCAC.1	-0.00637887	-0.000950137	-0.103403	0.000965185	0.00619664	0.00290802	0.00109964	0.00470049	-0.000273822	0.00183034	-0.00133447	-0.00452827	-0.00115128	-0.0048692	-0.00468533	-0.0356926	0.00526678	1.44728e-05	0.000133757	0.00151884	-0.00346083	0.00580967	0.00220336	-0.0055239	0.00410436	0.000107661	0.0740849	-0.000341071	-0.00138112	-0.0104076	0.0106526	-0.0773797	-0.00797331	-6.98395e-05	-0.00272313	-0.00676578	1.2368e-06	-4.65065e-05	-0.0053519	0.00255887	2.14707e-05	-0.000386164	8.14907e-09	0.00138156	-5.31273e-06	0.00185148	0.000435621	0.00116499	0.000264213
CCGTGAGGTTCCTACC.1	-0.0230508	0.00118977	-0.0525637	-0.0039221	0.0214684	0.00308133	0.00123769	-0.000665473	-0.000298474	0.00198177	-0.0014449	-0.00425904	-0.000769624	-0.0144374	-0.0161907	-0.0205589	0.00487109	1.70209e-05	0.000136983	0.00364791	-0.00638644	0.00591672	0.0025549	-0.00531276	0.00402608	1.34567e-05	0.0508203	-0.000399819	-0.00264374	-0.0243362	0.0283894	-0.140355	-0.0203568	-0.000104124	-0.00272688	-0.0111883	7.87713e-06	-8.69273e-06	-0.0230106	0.00266289	1.2028e-05	0.010088	1.07102e-08	0.0026596	1.05533e-05	0.00180819	0.0010708	0.000613182	0.000260418
CCGTTCAGTCTATGAC.1	-0.00333049	-0.00127343	-0.0299679	-0.000728752	-0.000971504	0.00290952	0.0010821	0.00589449	-0.000247965	0.00117474	-0.00132992	-0.00359807	-0.00117573	-3.53139e-05	-0.00366727	-0.0278204	0.00529633	1.4469e-05	0.000133067	0.00293122	-0.003109	0.0057662	0.00208131	-0.00556637	0.00413873	0.000120949	0.00272854	-0.000324359	-0.00102261	-0.00636318	0.00698983	0.0167557	-0.00708023	-6.39271e-05	-0.00272186	-0.00282121	-3.33786e-06	-5.12786e-05	0.00133133	0.00255623	2.83755e-05	-0.00108846	8.14907e-09	0.00102269	-1.41794e-05	0.00185703	0.000414804	0.00118931	0.000265962
CCGTTCAGTGCATACT.1	-0.00330726	-0.00126815	-0.0292415	-0.00029003	-0.00102059	0.002905	0.00107964	0.0058961	-0.000247855	0.00117453	-0.00133105	-0.00358487	-0.00117587	-0.000384675	-0.00366593	-0.0234302	0.00529649	1.45063e-05	0.000133092	0.00296605	-0.00311004	0.00576581	0.00208051	-0.00556777	0.00413936	0.000125058	-0.000118785	-0.000324307	-0.00102051	-0.00626295	0.00687156	0.0193445	-0.00708966	-6.39227e-05	-0.002722	-0.00278543	-3.76999e-06	-5.15617e-05	0.00161332	0.00255596	2.86065e-05	-0.00108713	8.14907e-09	0.0010192	-1.42835e-05	0.00185724	0.000413924	0.00118958	0.000265962
CCTAACCGTTGCCAAT.1	-0.00332598	-0.00126481	-0.0354919	-0.000533837	-0.0011956	0.00290381	0.0010746	0.00545995	-0.000248897	0.00117395	-0.00132967	-0.00361013	-0.00117617	-0.000404499	-0.00367144	-0.0261881	0.00529665	1.48453e-05	0.000133036	0.00294852	-0.00310351	0.00576032	0.00208014	-0.00556901	0.0041381	0.000125986	0.00698383	-0.000324382	-0.00106458	-0.00655303	0.00729914	0.0147598	-0.00709534	-6.45125e-05	-0.00271394	-0.00273882	-3.75882e-06	-5.10607e-05	0.00147378	0.00255738	2.82452e-05	-0.00105734	8.14907e-09	0.00106209	-1.27302e-05	0.00185301	0.000412106	0.00118782	0.000265962
CCTACGTTCAGTGTCA.1	-0.050433	0.0121693	0.0318397	-0.00320696	0.0142907	0.00388681	0.00139492	0.0170926	-0.000905819	0.00543369	-0.000952481	-0.00478846	-0.000622343	-0.0315055	-0.026063	0.0184407	0.00451855	3.46382e-05	0.000139426	-0.013654	-0.01963	0.0071892	0.00421802	-0.00447516	0.00329095	-3.94732e-05	-0.00706479	-0.000502137	-0.0046337	-0.0394868	0.0591257	0.233457	-0.0292568	-0.000170427	-0.00272199	-0.0511342	0.0110686	4.48655e-05	-0.0111198	0.00272913	-2.6688e-05	0.012084	8.48668e-08	0.00482155	0.000273328	0.00171924	0.00314631	3.00966e-05	0.00020298
CCTATCGGTCCACATA.1	-0.00654136	-0.00163716	-0.0562485	-0.0187252	0.0158038	0.00306992	0.0012323	0.00316746	-0.000266525	0.00114258	-0.00138451	-0.00353032	-0.00117571	0.012649	-0.00374944	-0.119183	0.00529374	1.46665e-05	0.00013301	0.0196928	-0.00344032	0.00583028	0.00233	-0.00576374	0.00407802	6.2082e-06	0.0410162	-0.000325976	-0.00185572	-0.011434	0.017702	-0.0847957	-0.0077487	-6.70683e-05	-0.00272218	-0.00611219	5.07385e-06	-3.34922e-05	-0.0392112	0.00275279	1.47615e-05	-0.00149859	2.32831e-09	0.00184624	-1.25892e-06	0.00207084	0.000619903	0.00119262	0.000265952
CCTCAACAGACTTCAC.1	-0.00325302	-0.00126585	-0.0277518	-0.000310008	-0.00106271	0.00290493	0.0010734	0.00586581	-0.000247871	0.00117455	-0.00133008	-0.00357776	-0.00117616	-0.000295175	-0.0036633	-0.0199333	0.00529686	1.44579e-05	0.000133086	0.00250169	-0.00308985	0.00576439	0.00208079	-0.00556998	0.0041406	0.000131849	-0.000695871	-0.00032427	-0.00100234	-0.00619482	0.00678317	0.0196146	-0.00705908	-6.38463e-05	-0.00272171	-0.00278832	-4.05312e-06	-5.16623e-05	0.00212222	0.00255677	2.87704e-05	-0.00108366	8.14907e-09	0.00100276	-1.42092e-05	0.00185494	0.000411689	0.00118797	0.000265963
CCTCACAAGTGCAGGT.1	-0.0048097	-0.00113127	-0.0974802	0.00131431	0.00334372	0.00290541	0.00108838	0.00506327	-0.000266358	0.00161084	-0.00133662	-0.00426447	-0.00113826	-0.00400777	-0.00414366	-0.0345901	0.00525745	1.44802e-05	0.000133431	0.00198453	-0.00325077	0.00578805	0.00212243	-0.00555581	0.00412045	0.000120351	0.0570491	-0.000333292	-0.00128001	-0.00893891	0.00896332	-0.0438912	-0.00762461	-6.70749e-05	-0.00272227	-0.0050267	1.19023e-06	-4.74975e-05	-0.00258842	0.00255795	2.49334e-05	-0.000788517	8.14907e-09	0.00128172	-8.27201e-06	0.0018545	0.000424191	0.00117835	0.000265419
CCTCAGTAGATACTGA.1	-0.00331777	-0.00126808	-0.0301933	-0.000448445	-0.00107611	0.00290406	0.00107903	0.00578776	-0.000247982	0.00117447	-0.00133063	-0.00359257	-0.00117606	-0.000226006	-0.00366627	-0.0235867	0.00529668	1.45324e-05	0.00013308	0.00290167	-0.00310691	0.00576613	0.00208024	-0.00556776	0.00413884	0.000126278	-5.35138e-05	-0.000324337	-0.0010298	-0.00627189	0.00692135	0.0181803	-0.0071175	-6.39444e-05	-0.0027217	-0.00277631	-3.83332e-06	-5.16009e-05	0.00156727	0.00255631	2.85991e-05	-0.00108529	8.14907e-09	0.00102872	-1.39482e-05	0.00185726	0.000412762	0.00118882	0.000265962
CCTCAGTGTAGAGTTA.1	-0.014717	-0.00358865	-0.0294304	-0.00403024	0.000348866	0.00629021	0.00136038	0.014288	-0.000290195	0.00111485	-0.00118899	-0.00503649	-0.00117454	-0.0051771	-0.00431617	-0.146936	0.00528631	3.46049e-05	0.000132291	0.0328024	-0.00478764	0.005863	0.0127304	-0.00595231	0.00403581	5.47129e-06	0.0212167	-0.000335498	-0.00198417	-0.0158095	0.0228945	-0.121374	-0.0138172	-6.95348e-05	-0.00272202	-0.0225581	9.85991e-06	-1.37929e-05	-0.0372967	0.00300921	1.20476e-05	-0.0112924	2.32831e-09	0.00195392	1.234e-08	0.00176676	0.00257623	0.00117593	0.00026454
CCTCAGTTCGCTACAA.1	-0.0205248	5.11399e-05	-0.0434387	-0.00307801	0.0220144	0.00305343	0.00121043	0.00193035	-0.000298033	0.00181273	-0.00147668	-0.0044843	-0.000901245	-0.0123928	-0.0099909	-0.0274982	0.00500365	2.02283e-05	0.000136189	0.000475001	-0.00503766	0.00594118	0.00239576	-0.00540732	0.00402849	2.19289e-05	0.0558242	-0.000387458	-0.00227333	-0.0217821	0.0234885	-0.111729	-0.013347	-0.000100082	-0.00273869	-0.0101019	3.84636e-06	-1.42921e-05	-0.0126193	0.00261918	1.21044e-05	0.00765398	1.07102e-08	0.00224648	3.02866e-06	0.00176911	0.000954567	0.000865131	0.000261763
CCTCATGCAACCGATT.1	-0.00327588	-0.00127072	-0.0275317	-8.01119e-05	-0.00133467	0.00290803	0.00107619	0.00594419	-0.000247799	0.00117432	-0.00133135	-0.00357505	-0.00117602	-0.000566494	-0.00366459	-0.0251246	0.00529664	1.45957e-05	0.000133079	0.00287534	-0.00309846	0.00576481	0.00208543	-0.00557108	0.00414007	0.000125263	-0.000211921	-0.000324277	-0.00100588	-0.00622737	0.0068435	0.0185405	-0.00709382	-6.38526e-05	-0.002722	-0.00281706	-3.91901e-06	-5.15319e-05	0.00172031	0.00255801	2.85283e-05	-0.00108625	8.14907e-09	0.00100486	-1.42353e-05	0.0018568	0.000418946	0.00118981	0.000265963
CCTCATGCAAGCTGCC.1	-0.00779702	-0.00101059	-0.0893566	-0.000114509	0.00887027	0.00291192	0.00111079	0.00483214	-0.000269615	0.00122058	-0.00136857	-0.00422937	-0.00116287	-0.00665225	-0.00411468	-0.0441551	0.00528295	1.51806e-05	0.000133432	6.60587e-06	-0.00346916	0.00583657	0.00210277	-0.00557756	0.00407787	8.31261e-05	0.0960881	-0.00033888	-0.00165383	-0.0129626	0.0123773	-0.0646347	-0.0104378	-7.3335e-05	-0.002722	-0.00773183	2.2538e-06	-3.94024e-05	-0.00905916	0.00259422	1.95969e-05	-0.000529811	8.14907e-09	0.00165382	-2.89176e-07	0.00185008	0.000475183	0.00116377	0.000265788
CCTCCTCTCGTTAGTG.1	-0.0104568	-0.000131858	-0.102442	0.000315843	0.0152116	0.00295238	0.00114424	0.00378427	-0.000287793	0.00125748	-0.00142276	-0.00431451	-0.00113233	-0.0101493	-0.00497931	-0.0453792	0.00525126	1.56164e-05	0.00013385	0.000190141	-0.0045104	0.0058662	0.0023353	-0.00555532	0.00405246	5.76805e-05	0.101443	-0.000355503	-0.00190494	-0.0160981	0.0162283	-0.121775	-0.0109988	-7.99861e-05	-0.00272201	-0.0090231	4.24124e-06	-2.82526e-05	-0.016867	0.00259376	1.50856e-05	0.00106249	8.3819e-09	0.00190515	1.02445e-08	0.00183447	0.000604168	0.00110711	0.000265202
CCTCTAGTCGGTATGT.1	-0.0127393	-0.000445467	-0.090302	0.000176345	0.0166445	0.00293208	0.00111439	0.00652628	-0.000288271	0.00206025	-0.00138177	-0.00457089	-0.00116883	-0.00823552	-0.00587694	-0.0283521	0.00528912	1.4618e-05	0.000134148	-0.00313019	-0.00407446	0.00586903	0.00216788	-0.00546065	0.00405252	5.82673e-05	0.0974475	-0.000353811	-0.0018806	-0.0145983	0.0151755	-0.13412	-0.00969703	-7.99965e-05	-0.002722	-0.00945401	5.92117e-06	-3.03052e-05	-0.0172577	0.0025654	1.48285e-05	0.00117729	8.17818e-09	0.00188312	-3.18978e-08	0.00184789	0.000471488	0.00108283	0.000265636
CCTCTCCAGGTATTGA.1	-0.00345046	-0.00122643	-0.0377641	-0.000385001	0.00331374	0.00291156	0.0010762	0.00549441	-0.000248535	0.00117158	-0.00133568	-0.00361586	-0.00117617	-0.00104746	-0.00366826	-0.0258947	0.00529664	1.44467e-05	0.000133032	0.00306304	-0.00314414	0.0057686	0.00208112	-0.00557798	0.00413647	9.97148e-05	0.023413	-0.000324277	-0.00106495	-0.00704984	0.00796124	-0.000157654	-0.00638375	-6.39426e-05	-0.002722	-0.00419791	-3.48501e-06	-4.89671e-05	-0.0043987	0.00256482	2.65092e-05	-0.00109313	8.14907e-09	0.0010592	-1.24918e-05	0.00184721	0.000478864	0.00118761	0.000265948
CCTGTTGAGGAACTCG.1	-0.0112494	-0.000504928	-0.0922171	-1.20364e-05	0.0126614	0.00291991	0.00111801	0.00707935	-0.000281957	0.00169056	-0.00138288	-0.00450746	-0.00116728	-0.00739439	-0.00511471	-0.02917	0.00528732	1.45137e-05	0.000134068	-0.00262591	-0.00398462	0.00585714	0.00211466	-0.00548597	0.00406143	7.07284e-05	0.0977515	-0.00035066	-0.00181605	-0.0138828	0.0133177	-0.106095	-0.00865543	-7.74233e-05	-0.002722	-0.00911683	5.87106e-06	-3.32464e-05	-0.0117202	0.00256304	1.64676e-05	0.000269424	8.17818e-09	0.00181817	-1.14087e-07	0.00185042	0.000454187	0.00112348	0.000265658
CCTGTTGTCACTACGA.1	-0.00657326	-0.00150268	-0.0590401	-0.0197523	0.0184055	0.00311006	0.00109421	0.00530017	-0.000262293	0.00115402	-0.00136183	-0.00356711	-0.00117253	0.0146742	-0.00373701	-0.0937525	0.00529133	1.44914e-05	0.000133082	0.00955602	-0.00321569	0.00581614	0.00212279	-0.00586219	0.00409355	1.89366e-05	0.0394126	-0.000325372	-0.00149027	-0.0105977	0.0138097	-0.0936363	-0.00836934	-6.61849e-05	-0.002722	-0.00630718	-1.43982e-06	-3.87169e-05	-0.029276	0.00284962	1.82148e-05	-0.0011433	8.03266e-09	0.00146726	-4.01167e-07	0.00184794	0.000807628	0.00118724	0.000265947
CCTTCAGCACAGCGCT.1	-0.00412985	-0.00128627	-0.071602	-0.0070576	0.0048615	0.00291592	0.00107997	0.00423678	-0.000258959	0.00116482	-0.00133916	-0.00367855	-0.00117532	0.00358256	-0.00371286	-0.0597679	0.00529523	1.44988e-05	0.000133041	0.00684918	-0.00315815	0.00578632	0.00212843	-0.0056366	0.0041209	4.99226e-05	0.0481973	-0.000324776	-0.00132103	-0.00913946	0.0113961	-0.0546969	-0.00571294	-6.50811e-05	-0.00272201	-0.00473374	3.53903e-07	-4.58658e-05	-0.0103544	0.00262467	2.2145e-05	-0.00100772	8.09086e-09	0.00130399	-4.1821e-06	0.00185207	0.00048691	0.00118686	0.000265963
CCTTCAGCACTATCCC.1	-0.0048767	-0.00132837	-0.0687304	-0.00839579	0.00873505	0.00295996	0.00108803	0.00432316	-0.00027133	0.00115978	-0.00132246	-0.00369465	-0.0011759	0.00321293	-0.00376112	-0.0818119	0.00529417	1.52923e-05	0.000133229	0.00856298	-0.00321047	0.00581209	0.00215146	-0.00569633	0.00409647	3.40845e-05	0.0470959	-0.000325223	-0.00163431	-0.0108656	0.0125358	-0.0555773	-0.00658669	-6.6106e-05	-0.00272198	-0.00562465	-9.98378e-07	-3.70797e-05	-0.0147185	0.00268894	1.96099e-05	-0.00106212	8.11997e-09	0.00161929	-9.15257e-07	0.00185157	0.000525281	0.00118556	0.000265962
CCTTGTGAGTCTTGGT.1	-0.00401791	-0.00129334	-0.0418792	-0.0105562	0.00696115	0.00292867	0.00109099	0.006902	-0.00025189	0.00116676	-0.00133837	-0.00360472	-0.00117454	0.00771062	-0.0037066	-0.0471125	0.00529448	1.4469e-05	0.000132991	0.00424727	-0.00314696	0.00578567	0.00218726	-0.00559443	0.00412218	5.3592e-05	0.0416975	-0.000325074	-0.00121468	-0.00842238	0.0100362	-0.0487793	-0.00549032	-6.54417e-05	-0.002722	-0.00519979	3.2261e-06	-4.71845e-05	-0.0117792	0.00258171	2.17054e-05	-0.00107872	8.14907e-09	0.00119777	-7.98213e-06	0.00184609	0.000523835	0.0011875	0.000265962
CGAAGGAAGACATAGT.1	-0.00527276	-0.0010024	-0.0852595	0.000847669	0.00133537	0.00290575	0.0011098	0.00526512	-0.000265924	0.00121033	-0.00134315	-0.00368356	-0.00117564	-0.00364226	-0.00398016	-0.0418697	0.0052911	1.60076e-05	0.000133613	0.00267097	-0.00339581	0.0057994	0.00215099	-0.00550874	0.00410879	0.000118352	0.0473756	-0.000329418	-0.00128843	-0.00844508	0.00833985	-0.00218034	-0.006304	-6.65399e-05	-0.00272198	-0.00570226	-1.59442e-06	-4.74211e-05	-0.00152844	0.00255764	2.58461e-05	-0.000840832	8.61473e-09	0.00128949	-7.9493e-06	0.00185679	0.000459969	0.00115032	0.000264257
CGAAGGACAACGACTT.1	-0.00384063	-0.00127452	-0.0525486	-0.0036127	0.0069846	0.00290665	0.00108321	0.0019608	-0.000254164	0.00116681	-0.00133581	-0.00372366	-0.00117603	0.000448234	-0.00368269	-0.0650085	0.00529521	1.52886e-05	0.000132909	0.00435934	-0.00314001	0.00578165	0.00207956	-0.00561193	0.00412378	6.54645e-05	0.0527411	-0.000324538	-0.00128269	-0.00887472	0.0122429	-0.0389674	-0.00656654	-6.45036e-05	-0.002722	-0.00400302	-2.25753e-06	-4.42415e-05	-0.0098061	0.00259973	2.30223e-05	-0.0010329	8.11997e-09	0.00126765	-2.1446e-06	0.00184707	0.000442803	0.00118742	0.000265963
CGAAGTTAGCTAAGTA.1	-0.00697268	-0.000840563	-0.0940619	0.000434447	0.00669416	0.00290901	0.00110347	0.00645334	-0.000271835	0.00122764	-0.00135805	-0.004063	-0.00116038	-0.00604042	-0.00419783	-0.0308791	0.00527942	1.45324e-05	0.000133671	-8.67806e-06	-0.00358064	0.00582029	0.00208323	-0.00554389	0.00409212	9.96981e-05	0.0885968	-0.000337971	-0.00153976	-0.0116412	0.00999859	-0.0545245	-0.00995896	-7.04293e-05	-0.00272201	-0.00869173	5.36907e-06	-4.31184e-05	-0.00619203	0.00256549	2.09194e-05	-0.000676911	8.14907e-09	0.00154016	-1.112e-06	0.00185163	0.000478804	0.00116093	0.00026547
CGAAGTTTCTACTTCA.1	-0.00406102	-0.0012714	-0.0346127	-0.0105534	0.00622959	0.00295597	0.00109416	0.00573397	-0.000250857	0.0011631	-0.00133976	-0.00362029	-0.00117613	0.00740849	-0.00372669	-0.0526595	0.0052962	1.49086e-05	0.000132974	0.00627322	-0.00320115	0.0057911	0.00214279	-0.00560054	0.00411743	4.56367e-05	0.0447048	-0.000325097	-0.00121313	-0.00873297	0.0121714	-0.0577563	-0.00551251	-6.51098e-05	-0.00272201	-0.00535721	3.68804e-06	-4.8209e-05	-0.0129136	0.00258781	2.01464e-05	-0.00108628	8.09086e-09	0.00119802	-7.08969e-06	0.00185124	0.000564545	0.00118753	0.000265952
CGACAGCAGACATCCT.1	-0.00366108	-0.00127645	-0.0491045	-0.00321664	0.00403526	0.00291279	0.00108465	0.00408221	-0.000250298	0.00117023	-0.00133439	-0.00361574	-0.00117599	0.00145721	-0.00367394	-0.0508511	0.00529618	1.44616e-05	0.000133013	0.00387008	-0.00312334	0.00577235	0.00210618	-0.00559326	0.00413297	7.06501e-05	0.0302998	-0.000324426	-0.00110908	-0.0073676	0.00939607	-0.0153899	-0.00668133	-6.43759e-05	-0.002722	-0.00376044	-2.76975e-06	-4.95296e-05	-0.00591293	0.00258001	2.45385e-05	-0.0010745	8.14907e-09	0.00109889	-7.57608e-06	0.00185218	0.000451639	0.00118759	0.000265963
CGACAGCCAGAATCGG.1	-0.00328346	-0.00126434	-0.0299011	-0.000868067	-0.00127054	0.00290397	0.00107442	0.00559559	-0.000248571	0.00117428	-0.00132962	-0.00360331	-0.00117615	2.03773e-06	-0.00366589	-0.0242007	0.00529669	1.46776e-05	0.000133039	0.00282952	-0.00309769	0.0057623	0.00208028	-0.00557068	0.00413927	0.000128644	0.00646733	-0.000324329	-0.00104297	-0.00647515	0.00711287	0.0185407	-0.00699019	-6.41707e-05	-0.00271775	-0.00274162	-3.83705e-06	-5.12451e-05	0.00160101	0.00255793	2.84798e-05	-0.00106989	8.14907e-09	0.00104056	-1.32332e-05	0.00185346	0.000412568	0.00118794	0.000265963
CGAGAAGGTTATCTTC.1	-0.00576861	-0.00137655	-0.081929	-0.0113888	0.00935495	0.00299969	0.00109116	0.000598908	-0.00027882	0.0011482	-0.00132451	-0.00384793	-0.00117237	0.00350217	-0.003824	-0.070543	0.00529068	1.67564e-05	0.000133038	0.00870466	-0.00328538	0.00583947	0.00212981	-0.00570653	0.00407216	2.3555e-05	0.0827474	-0.000327332	-0.0018874	-0.0137116	0.0193252	-0.0798209	-0.00701884	-7.06279e-05	-0.00272163	-0.00711319	5.36442e-07	-2.91094e-05	-0.0191659	0.00270146	1.65552e-05	-0.00075125	8.14907e-09	0.00188254	4.19095e-09	0.00184836	0.000566304	0.0011836	0.000265904
CGAGTGCTCCTATGGA.1	-0.00490233	-0.00133313	-0.0519701	-0.01062	0.0148097	0.00294607	0.0011011	0.00312416	-0.000261229	0.00116185	-0.00133803	-0.00361304	-0.00117531	0.0060559	-0.00371592	-0.0761215	0.0052944	1.46143e-05	0.000132971	0.00769228	-0.00319693	0.00579481	0.00210196	-0.00573771	0.00411187	3.18214e-05	0.0490389	-0.000324881	-0.00148739	-0.0101382	0.0137039	-0.0653167	-0.00748708	-6.52863e-05	-0.002722	-0.00604337	-2.04146e-06	-4.18369e-05	-0.0217196	0.00272581	1.99676e-05	-0.00113964	7.79983e-09	0.00146738	-9.46689e-07	0.00185307	0.00058341	0.00118682	0.000265962
CGAGTTATCCACAAGT.1	-0.00850223	-0.00129525	-0.0788008	-0.00449855	0.018583	0.00312102	0.00114964	-0.00285439	-0.000296934	0.0011393	-0.00101905	-0.00380261	-0.00115797	-0.0104437	-0.00418957	-0.0302143	0.00524588	3.35602e-05	0.000133064	-0.00430436	-0.00376347	0.0059253	0.00240251	-0.00548267	0.00404406	3.54163e-05	0.0879596	-0.000340967	-0.00244125	-0.0208882	0.0292398	-0.0969393	-0.0123411	-9.17338e-05	-0.00272267	-0.0165966	6.83311e-06	-2.39331e-05	-0.0143627	0.00264174	1.37649e-05	0.00341092	1.30385e-08	0.00241028	7.33649e-07	0.00182436	0.000823259	0.00116689	0.000257434
CGATGCGAGTATGAAC.1	-0.00577913	-0.0013312	-0.0860038	-0.0161032	0.0126809	0.00295197	0.00109754	0.002918	-0.000270113	0.00115309	-0.00132948	-0.0037964	-0.0011751	0.00903053	-0.00377721	-0.075673	0.00529355	1.49049e-05	0.000133099	0.00654493	-0.00326301	0.00582913	0.00215809	-0.00578387	0.00408052	2.11075e-05	0.078139	-0.000325425	-0.00177745	-0.012836	0.0166652	-0.0886117	-0.00623324	-6.7423e-05	-0.002722	-0.00668865	3.63216e-07	-3.21846e-05	-0.0187501	0.00277624	1.77287e-05	-0.000645902	8.14907e-09	0.00176235	-4.19095e-09	0.00184974	0.000527412	0.00118741	0.000265956
CGATGCGTCAGGAACG.1	-0.00419059	-0.00127892	-0.068932	-0.00791207	0.0075951	0.00290852	0.00108619	0.00241685	-0.000258368	0.00116384	-0.0013339	-0.00373803	-0.00117607	0.00413371	-0.0036923	-0.0722166	0.00529552	1.49198e-05	0.000132928	0.00478081	-0.00315143	0.00578772	0.00208995	-0.00565085	0.00412006	4.90472e-05	0.0636703	-0.000324754	-0.0013597	-0.00949508	0.0122743	-0.0500691	-0.00674061	-6.54091e-05	-0.00272201	-0.00439578	2.27429e-06	-4.00245e-05	-0.0105739	0.00263868	2.20593e-05	-0.000975337	8.14907e-09	0.0013438	-1.64355e-06	0.00184879	0.000450149	0.00118753	0.000265962
CGATGCGTCTCTCTTC.1	-0.0167168	0.00169915	-0.0659705	-0.00127074	0.0231666	0.00299208	0.00116509	0.00294297	-0.000297383	0.00185261	-0.00144961	-0.00443604	-0.0011129	-0.0124261	-0.00730226	-0.0219947	0.00522253	2.38642e-05	0.00013447	-0.00240622	-0.00651012	0.00590576	0.00231867	-0.0054373	0.0040333	3.41684e-05	0.0914589	-0.000362551	-0.00209438	-0.0200375	0.0223136	-0.148253	-0.0132167	-9.08447e-05	-0.00272333	-0.016064	5.15673e-06	-2.38325e-05	-0.0201087	0.00260256	1.27479e-05	0.0054153	1.18744e-08	0.00209891	1.88942e-06	0.0017939	0.00111464	0.000945173	0.000262508
CGCATGGGTACAGTTC.1	-0.00650876	-0.00114583	-0.0977776	-0.000683003	0.0120178	0.00296601	0.00111929	0.0028268	-0.000275902	0.00116958	-0.00125633	-0.00386973	-0.00117498	-0.006143	-0.00409125	-0.0419049	0.00529144	1.68979e-05	0.000134096	0.00121866	-0.00344068	0.00584679	0.00229849	-0.00552784	0.00406906	5.93271e-05	0.0778854	-0.000328829	-0.00157199	-0.0126662	0.0133693	-0.0338461	-0.00827006	-7.02501e-05	-0.00272355	-0.00786933	8.56817e-08	-4.16581e-05	-0.0103367	0.00258218	2.14204e-05	0.000264082	9.08039e-09	0.001572	-7.97678e-07	0.00182883	0.000565082	0.00113901	0.000264529
CGCATGGTCACTGTCC.1	-0.00440662	-0.00128672	-0.069922	-0.0021621	0.00559242	0.00294415	0.0010923	0.0033555	-0.000263357	0.00116818	-0.00126522	-0.00380616	-0.00117583	-0.00185305	-0.00383027	-0.0571819	0.00529636	1.47559e-05	0.000133574	0.00305603	-0.00317961	0.00580562	0.00208026	-0.00555354	0.00410328	7.51987e-05	0.0521709	-0.00032468	-0.00140887	-0.00981822	0.0107872	-0.00535959	-0.00694486	-6.55766e-05	-0.00272319	-0.00510576	-9.12696e-08	-4.66481e-05	-0.00668651	0.00256449	2.42107e-05	-0.00090177	8.14907e-09	0.00141124	-4.6643e-06	0.00185262	0.000452802	0.00118385	0.000265881
CGCCAGAGTGATGGCA.1	-0.0037322	-0.00126824	-0.0619253	-0.00396636	0.00305868	0.00290489	0.00108196	0.00369153	-0.000253629	0.00116889	-0.0013362	-0.00367692	-0.00117576	0.00134122	-0.00368081	-0.0499218	0.00529556	1.44914e-05	0.000133008	0.00453617	-0.0031312	0.00577492	0.00212094	-0.00561439	0.00413022	6.68187e-05	0.048163	-0.000324322	-0.00116144	-0.00828987	0.00989361	-0.023218	-0.00595102	-6.42224e-05	-0.002722	-0.00387722	7.3202e-07	-4.71249e-05	-0.0054552	0.00260115	2.44491e-05	-0.00101891	8.14907e-09	0.00114952	-5.42472e-06	0.00185097	0.000440985	0.00118764	0.000265963
CGCCAGATCAACGTGT.1	-0.00461044	-0.00129653	-0.072975	-0.00896254	0.00924365	0.00292606	0.00109172	0.00248171	-0.000263533	0.00116028	-0.00132956	-0.00375461	-0.00117586	0.00418934	-0.00372477	-0.0766165	0.00529519	1.50017e-05	0.000132922	0.00535058	-0.0031819	0.00579797	0.00211499	-0.00567776	0.00411071	4.01251e-05	0.0734492	-0.000324948	-0.00150518	-0.0104973	0.013358	-0.0668999	-0.00715898	-6.62055e-05	-0.00272201	-0.00529411	1.73785e-06	-3.65712e-05	-0.0129949	0.00266702	2.05748e-05	-0.000877019	8.14907e-09	0.00148891	-8.3982e-07	0.00184772	0.000471845	0.00118741	0.00026596
CGCCAGATCGAAGTGG.1	-0.0184762	0.0033297	-0.0529345	-0.00262377	0.023908	0.00315292	0.00125477	0.00275279	-0.000297389	0.00185908	-0.00119584	-0.00419034	-0.0007663	-0.0170516	-0.00623065	-0.0238521	0.00484174	2.94e-05	0.00013458	-0.0117048	-0.00855677	0.00592657	0.00245687	-0.00538151	0.00402947	1.74511e-05	0.0800704	-0.000376729	-0.00270648	-0.0255344	0.0322192	-0.115576	-0.0179697	-0.000110524	-0.00272197	-0.0254999	8.16211e-06	-1.88379e-05	-0.0116753	0.00266378	1.21165e-05	0.00660436	1.42609e-08	0.00272892	2.08034e-05	0.00175221	0.00212383	0.00101797	0.000251904
CGCCATTAGAGGTCAC.1	-0.00729897	-0.00142638	-0.0934867	-0.0305787	0.0214107	0.00302184	0.00110834	0.00147907	-0.000277948	0.00113313	-0.0013244	-0.00359173	-0.0011753	0.0222574	-0.00382783	-0.0856262	0.00529192	1.61566e-05	0.00013298	0.0126521	-0.00337326	0.0058498	0.0022461	-0.00585726	0.00406462	5.99585e-06	0.0492848	-0.00032985	-0.00194295	-0.0138687	0.0211491	-0.128942	-0.00628982	-7.01382e-05	-0.00272203	-0.00778678	4.79445e-06	-3.03071e-05	-0.0339098	0.00284598	1.48602e-05	-0.000473123	7.68341e-09	0.00192979	5.93718e-09	0.00184851	0.000635371	0.0011869	0.000265954
CGCCATTCATTCTCTA.1	-0.0163437	0.000187663	-0.0574127	0.000448038	0.0119853	0.00294473	0.00113034	0.00738966	-0.000291912	0.00431932	-0.00140673	-0.00536056	-0.00117173	-0.00824664	-0.0107176	-0.0337117	0.00529136	1.52551e-05	0.000134597	-0.00159902	-0.00471884	0.00589232	0.00241535	-0.00543708	0.00404106	5.68386e-05	0.0882851	-0.000378175	-0.00176738	-0.0151274	0.0159755	-0.18269	-0.0104121	-9.04729e-05	-0.00272228	-0.00927436	5.84917e-06	-3.36058e-05	-0.0148714	0.00258078	1.26576e-05	0.00306979	8.41101e-09	0.00177305	1.42027e-08	0.00184844	0.000555068	0.000995412	0.0002653
CGGAATTAGCTTTCTT.1	-0.0045964	-0.00130635	-0.0794342	-0.00745559	0.00887061	0.00293812	0.00108437	0.00279877	-0.00026486	0.00115942	-0.00132281	-0.00374658	-0.00117587	0.00242998	-0.00375287	-0.0679915	0.00529519	1.53482e-05	0.000132963	0.00503756	-0.0031782	0.0057988	0.00213156	-0.00567912	0.00411016	4.29451e-05	0.0715217	-0.000325171	-0.00152074	-0.0107467	0.0131283	-0.0695834	-0.00705379	-6.65259e-05	-0.00272203	-0.00532112	2.20351e-06	-3.67444e-05	-0.0115501	0.00266922	2.03531e-05	-0.000750307	8.14907e-09	0.00150646	-1.06893e-06	0.00184947	0.000482663	0.00118722	0.00026596
CGGACACAGCTGTACT.1	-0.00375592	-0.00128911	-0.0352685	-0.00857186	0.00500469	0.00293983	0.00109039	0.00590793	-0.000250422	0.0011665	-0.00134163	-0.00358924	-0.00117614	0.00585811	-0.00371124	-0.046752	0.00529621	1.54413e-05	0.000132978	0.00535248	-0.00314952	0.00578704	0.00211523	-0.00560242	0.0041203	5.46984e-05	0.0384988	-0.000324829	-0.00116833	-0.00828021	0.0110963	-0.0484329	-0.00577154	-6.48027e-05	-0.00272221	-0.00501531	4.06057e-06	-4.79501e-05	-0.0103467	0.00258915	2.18004e-05	-0.00108814	8.11997e-09	0.00115418	-8.2932e-06	0.0018488	0.000547469	0.00118752	0.000265937
CGGACACCACTTCCTG.1	-0.00411218	-0.00126132	-0.0401607	-0.00697435	0.00510695	0.00291566	0.00108434	0.00467257	-0.000255677	0.00116631	-0.00133983	-0.00365538	-0.00117597	0.00415989	-0.00369857	-0.0426737	0.00529578	1.4469e-05	0.000132989	0.0050791	-0.00314579	0.00578372	0.00218114	-0.00558962	0.00412196	5.98673e-05	0.0469482	-0.000324672	-0.00121532	-0.00844666	0.0109129	-0.0449447	-0.00560863	-6.47238e-05	-0.002722	-0.00534195	1.52737e-06	-4.62644e-05	-0.00917107	0.00257782	2.25976e-05	-0.00106261	8.14907e-09	0.00119938	-7.35419e-06	0.00183737	0.00051479	0.0011875	0.000265963
CGGAGAAGTCTCGGAC.1	-0.00398578	-0.00128544	-0.0529906	-0.00161801	0.00557349	0.00292279	0.00107341	0.00264929	-0.000260267	0.00116648	-0.00133183	-0.00372393	-0.00117453	-0.00206899	-0.00369855	-0.0594862	0.00529421	1.4551e-05	0.000132985	0.00485481	-0.00313745	0.00578823	0.00208408	-0.00562455	0.00411913	8.60151e-05	0.054974	-0.000325343	-0.0013553	-0.00940145	0.0113774	-0.0295392	-0.00699372	-6.61865e-05	-0.002722	-0.00465518	-2.55555e-06	-4.28706e-05	-0.00812373	0.0026136	2.30223e-05	-0.00107496	8.14907e-09	0.00134307	-2.23028e-06	0.00185225	0.000454336	0.00118741	0.000265958
CGGAGAAGTTATGTGC.1	-0.00507132	-0.00131394	-0.0816914	-0.00907516	0.00979405	0.00294645	0.00108685	0.00292341	-0.000267521	0.00115858	-0.00132338	-0.00379957	-0.00117586	0.00331984	-0.00375696	-0.0724529	0.00529498	1.5121e-05	0.000133066	0.00560806	-0.00320225	0.00581066	0.00216221	-0.00569995	0.00409866	3.67556e-05	0.079981	-0.000325015	-0.00162425	-0.0115297	0.0141109	-0.072115	-0.00719985	-6.67296e-05	-0.002722	-0.00602615	4.63799e-07	-3.42168e-05	-0.0139486	0.00269176	1.97086e-05	-0.000751223	8.14907e-09	0.00160869	-2.96626e-07	0.00184737	0.000495568	0.00118735	0.000265956
CGGCAGTAGGTGCTTT.1	-0.00356989	-0.00124889	-0.0364604	-0.0014774	0.00286826	0.00291234	0.00107517	0.00483491	-0.000249507	0.00117005	-0.00133775	-0.00363106	-0.00117572	-0.000220459	-0.00367489	-0.0317037	0.00529579	1.44616e-05	0.000133032	0.00461322	-0.00313484	0.00577338	0.00208494	-0.00558744	0.00413187	8.07345e-05	0.0304778	-0.000324367	-0.00108805	-0.00732277	0.00909748	-0.0206493	-0.00612115	-6.40907e-05	-0.002722	-0.00442703	-1.36346e-06	-4.90509e-05	-0.00582996	0.00257474	2.47583e-05	-0.00109323	7.97445e-09	0.00107752	-1.0357e-05	0.00184587	0.000497624	0.00118761	0.000265948
CGGCAGTAGGTTCCAT.1	-0.00464499	-0.00135025	-0.0929826	-0.00521505	0.00670837	0.00302957	0.00107329	0.00316279	-0.000272487	0.00116359	-0.00124596	-0.00386846	-0.00117584	-0.000393674	-0.00381345	-0.0574483	0.00529503	1.61603e-05	0.000133442	0.00495134	-0.00321144	0.00581638	0.00214607	-0.00560218	0.00409142	6.13313e-05	0.0603603	-0.000325298	-0.00156932	-0.0114952	0.0115633	-0.0319644	-0.00657495	-6.70842e-05	-0.00271993	-0.00613901	-1.16415e-06	-3.34233e-05	-0.00524092	0.00260663	2.15787e-05	-0.000772234	8.3819e-09	0.00156424	-9.07807e-07	0.00184996	0.000474855	0.00118507	0.000265947
CGGGCATGTCAAAGAT.1	-0.00353725	-0.00121504	-0.0391427	-0.00053821	0.0034029	0.00291206	0.00107186	0.00528754	-0.000248941	0.00117096	-0.00133716	-0.00364826	-0.00117617	-0.00103669	-0.00366872	-0.0263007	0.00529645	1.44467e-05	0.000133021	0.00308114	-0.0031587	0.0057708	0.00208242	-0.00558057	0.00413418	8.95876e-05	0.0285944	-0.000324307	-0.00107487	-0.00722292	0.00863228	-0.00962725	-0.00622464	-6.40129e-05	-0.002722	-0.0044622	-2.62074e-06	-5.05559e-05	-0.00494322	0.00256753	2.57082e-05	-0.00109783	8.09086e-09	0.00106618	-1.10164e-05	0.00184825	0.000509203	0.00118761	0.000265948
CGGGCATGTCATGACT.1	-0.0043069	-0.00131713	-0.0888035	-0.00335681	0.00404602	0.00302629	0.00107536	0.00338883	-0.000266576	0.00116725	-0.00125621	-0.00382433	-0.00117572	-0.00102744	-0.00378778	-0.0555145	0.00529585	1.53631e-05	0.000133429	0.00413434	-0.00321891	0.00580751	0.00212562	-0.00558542	0.00410111	7.88271e-05	0.0553472	-0.000325037	-0.00141692	-0.0102096	0.0105242	-0.0211248	-0.00681365	-6.66756e-05	-0.00272005	-0.00551176	-7.61822e-07	-3.81321e-05	-0.00432155	0.00258595	2.35029e-05	-0.000772562	8.14907e-09	0.00141469	-2.502e-06	0.00184846	0.000461116	0.00118561	0.000265945
CGGGTGTTCACATTGG.1	-0.0189301	0.000500886	-0.0517733	-0.000466348	0.0188631	0.00292003	0.00113317	0.00675593	-0.000294826	0.00587766	-0.00141274	-0.00579233	-0.00117209	-0.00775438	-0.00764715	-0.0335733	0.00529222	1.59889e-05	0.000134628	-0.00459872	-0.00498753	0.00589214	0.0022845	-0.00542837	0.00403871	6.20913e-05	0.100384	-0.000376118	-0.00177559	-0.0159779	0.0169942	-0.160353	-0.00988185	-8.91765e-05	-0.00272261	-0.0123568	5.9437e-06	-3.29856e-05	-0.0176758	0.00256921	1.31857e-05	0.00200308	8.49832e-09	0.00178842	3.65544e-08	0.00184776	0.00057739	0.0010147	0.000265583
CGGTCAGTCCTTCGAC.1	-0.00970013	-0.000439119	-0.100738	0.00053436	0.0129155	0.00292353	0.00111978	0.00644246	-0.000279779	0.00154776	-0.0013858	-0.00446392	-0.00116519	-0.00760393	-0.00532757	-0.036819	0.00528476	1.46292e-05	0.000133898	-0.00145246	-0.00406911	0.00585023	0.00217178	-0.00552121	0.00406986	7.01733e-05	0.093645	-0.000348141	-0.00171444	-0.0134978	0.0126087	-0.115686	-0.00941476	-7.67452e-05	-0.00272201	-0.00720069	5.8969e-06	-3.77521e-05	-0.013332	0.00257657	1.66073e-05	0.000742519	8.14907e-09	0.00171444	-3.19909e-07	0.00184135	0.000469267	0.00112063	0.000265589
CGTAAGTAGTCAGCGA.1	-0.00821316	-0.000299424	-0.09537	0.000359561	0.00829225	0.00291519	0.00111353	0.0058133	-0.000278314	0.00199476	-0.00132969	-0.00435609	-0.00117238	-0.00600267	-0.0050376	-0.0263485	0.00528518	1.49347e-05	0.000134042	-0.0004826	-0.0041335	0.00583569	0.00213471	-0.00550641	0.00408169	9.73344e-05	0.0866974	-0.000346122	-0.00152912	-0.01197	0.0115393	-0.0815223	-0.00810204	-7.42842e-05	-0.00272243	-0.00796053	6.97747e-06	-4.43775e-05	-0.00613961	0.00255962	1.87159e-05	1.94199e-05	8.17818e-09	0.00152914	-1.50455e-06	0.00184296	0.000449672	0.00114013	0.000263693
CGTAAGTCAAATGCGG.1	-0.00358697	-0.00133347	-0.049069	-0.00369588	0.00655337	0.00297534	0.00108713	0.00489279	-0.000249674	0.00116954	-0.00130387	-0.00359276	-0.00117606	0.00134964	-0.00367478	-0.0503651	0.00529633	1.44802e-05	0.000132991	0.00370298	-0.00313953	0.00578677	0.00209364	-0.00558852	0.00412072	6.87353e-05	0.036299	-0.000324657	-0.0011319	-0.00791888	0.01067	-0.0296212	-0.00593105	-6.4561e-05	-0.00272201	-0.00392944	3.33786e-06	-4.83692e-05	-0.009837	0.00257516	2.3596e-05	-0.00112238	8.14907e-09	0.00112083	-8.96747e-06	0.00184808	0.000493824	0.00118759	0.00026585
CGTAAGTCATCCGTTC.1	-0.0183168	0.00137962	-0.0452621	-0.000163601	0.0176962	0.00294572	0.0011365	0.00724387	-0.000296371	0.00341005	-0.00142153	-0.00542031	-0.00117007	-0.00982311	-0.012368	-0.0262596	0.00528853	1.65775e-05	0.000135016	-0.00296794	-0.00596378	0.00590068	0.00268384	-0.00536351	0.00403562	4.07212e-05	0.0886013	-0.000381818	-0.00193932	-0.017359	0.0186824	-0.180397	-0.0103574	-9.49581e-05	-0.00272285	-0.0122215	6.19702e-06	-2.53916e-05	-0.0202578	0.00258301	1.22804e-05	0.003259	8.90577e-09	0.0019534	4.44707e-08	0.00184426	0.000644624	0.000884807	0.000265
CGTAGTACATGATAGA.1	-0.00629488	-0.00137244	-0.0939302	-0.0207607	0.0184952	0.00298773	0.00108183	0.00302737	-0.000275601	0.00114682	-0.00132392	-0.00379453	-0.001175	0.0126648	-0.00381367	-0.0686947	0.00529303	1.55456e-05	0.000133151	0.00740183	-0.00325633	0.00584165	0.00218901	-0.00581035	0.00406963	1.41202e-05	0.0667577	-0.000327131	-0.00183511	-0.0138716	0.0180248	-0.103014	-0.00627197	-6.87164e-05	-0.002722	-0.00689557	1.72481e-06	-3.23374e-05	-0.0255631	0.00280236	1.69016e-05	-0.000372499	8.14907e-09	0.00182029	7.21775e-09	0.0018478	0.000565499	0.00118697	0.000265952
CGTCAAAAGCAGGCTA.1	-0.00330355	-0.0012604	-0.0357466	-0.0010278	-0.00106999	0.00290585	0.00107189	0.00517565	-0.000250457	0.00117383	-0.00132922	-0.00363533	-0.00117617	-0.0002602	-0.00367082	-0.0273421	0.00529662	1.47931e-05	0.000132989	0.00308882	-0.00309856	0.00576509	0.0020811	-0.00557362	0.00413708	0.000125134	0.0203408	-0.000324382	-0.00108686	-0.00692494	0.00761633	0.0130328	-0.0069552	-6.46615e-05	-0.00271705	-0.00276248	-3.67872e-06	-5.03492e-05	0.00111657	0.00256127	2.78801e-05	-0.00104916	8.14907e-09	0.00108363	-1.18101e-05	0.00184686	0.000413641	0.00118778	0.000265962
CGTCAAACAAGAGCTG.1	-0.00580069	-0.00132289	-0.0831642	-0.020825	0.0159689	0.00294007	0.00109188	0.00358634	-0.000268022	0.00115384	-0.00134023	-0.00370627	-0.00117492	0.0143174	-0.00377228	-0.0811515	0.00529348	1.46218e-05	0.000133162	0.00746236	-0.00323931	0.00582121	0.00214043	-0.00577493	0.00408793	1.98716e-05	0.0672336	-0.000325529	-0.00169145	-0.0121792	0.0155994	-0.0923326	-0.00665381	-6.67999e-05	-0.002722	-0.00575164	-5.90459e-07	-3.61968e-05	-0.0237354	0.00276466	1.79484e-05	-0.000716336	8.11997e-09	0.00167307	-9.35979e-08	0.00184917	0.000544652	0.00118719	0.00026596
CGTGATAGTACAACGG.1	-0.00346515	-0.00123453	-0.0349554	-2.6796e-05	0.0033315	0.00291301	0.00107875	0.00556747	-0.000248398	0.00117128	-0.00133537	-0.00360068	-0.00117616	-0.00144683	-0.0036663	-0.0266341	0.00529663	1.4443e-05	0.000133032	0.00315849	-0.00313902	0.00576777	0.00207948	-0.00557801	0.00413733	0.000103125	0.0234976	-0.00032427	-0.0010707	-0.00707391	0.00793569	-0.000491053	-0.00640241	-6.39397e-05	-0.002722	-0.00423492	-3.00258e-06	-4.83617e-05	-0.00451869	0.00256488	2.62633e-05	-0.00109616	8.14907e-09	0.00106581	-1.26483e-05	0.00184492	0.000467807	0.00118761	0.000265932
CGTGATAGTACGACAG.1	-0.00363414	-0.00125779	-0.0563078	-0.00117069	0.00405013	0.0029083	0.00108298	0.00396267	-0.000252945	0.00117014	-0.00133307	-0.00365769	-0.0011758	-0.00121449	-0.00368115	-0.0444572	0.00529565	1.44467e-05	0.000132995	0.00321183	-0.00313457	0.00577119	0.0020871	-0.00561498	0.0041338	7.67466e-05	0.0487048	-0.000324344	-0.00113136	-0.0080348	0.00957936	-0.015761	-0.00631047	-6.41607e-05	-0.002722	-0.00361529	-2.26125e-06	-4.8982e-05	-0.00526464	0.0026018	2.4952e-05	-0.00104314	8.14907e-09	0.00111947	-5.35208e-06	0.00184535	0.000432983	0.0011876	0.000265963
CGTGTCTCAAGCACAG.1	-0.00496018	-0.00112691	-0.0797307	0.000787592	0.00469155	0.00290724	0.00108759	0.00535626	-0.000265965	0.00120097	-0.00133914	-0.00389855	-0.0011631	-0.0046675	-0.00396701	-0.0355284	0.00528333	1.4551e-05	0.000133188	0.00177277	-0.00326761	0.00579911	0.00209583	-0.00556321	0.00411267	0.000114359	0.0725729	-0.000336809	-0.00140198	-0.00975616	0.00917135	-0.0364109	-0.00839634	-6.92427e-05	-0.00272341	-0.00610566	6.14673e-08	-4.44744e-05	-0.00460863	0.0025653	2.40952e-05	-0.000991855	8.14907e-09	0.00140337	-3.63751e-06	0.00185563	0.000443771	0.00117794	0.000265805
CGTTCTGCAACTGCCG.1	-0.0128543	-0.000361938	-0.0839058	0.000630975	0.0126381	0.0029435	0.00111276	0.00545565	-0.000286633	0.00297966	-0.00133901	-0.00475928	-0.00117162	-0.00800863	-0.00757245	-0.0359578	0.00529091	1.46478e-05	0.000134442	-0.00073933	-0.00414792	0.00586425	0.00226564	-0.00542854	0.00405631	7.41035e-05	0.0937185	-0.000352284	-0.00175073	-0.0141071	0.0145889	-0.135286	-0.00883453	-7.91687e-05	-0.00272201	-0.00908935	5.93043e-06	-3.35593e-05	-0.0143428	0.00256152	1.47857e-05	0.00108428	8.20728e-09	0.00175273	-2.63797e-07	0.00185154	0.000455558	0.00107873	0.000265291
CGTTCTGCACTGTCCT.1	-0.0115629	-0.00116077	-0.060622	-0.00234926	0.0257573	0.00317271	0.00113417	0.00345744	-0.000296768	0.00117345	-0.00126211	-0.00417002	-0.00116851	-0.0110098	-0.00451993	-0.0248036	0.00524381	3.11993e-05	0.000133317	-0.00251544	-0.0038427	0.00590758	0.00318397	-0.00547874	0.00403392	2.19308e-05	0.0822436	-0.000342881	-0.00224265	-0.0194623	0.0231294	-0.107124	-0.00917232	-8.89911e-05	-0.00272325	-0.0170035	5.2955e-06	-2.25957e-05	-0.0294627	0.00259709	1.35899e-05	0.00134576	1.14087e-08	0.00223282	2.53087e-07	0.00183675	0.000914723	0.00112261	0.000253638
CTAACTTCAGAGAGGG.1	-0.00364098	-0.00126809	-0.042438	-0.00290205	0.0046211	0.00291629	0.00108412	0.00580499	-0.000249058	0.00116961	-0.00132768	-0.00357725	-0.00117614	0.00074308	-0.00367838	-0.040495	0.00529588	1.44877e-05	0.000133002	0.0036319	-0.00312531	0.00577904	0.00208102	-0.00559276	0.00412755	7.40755e-05	0.0343765	-0.000324449	-0.00111176	-0.00772544	0.00950884	-0.0287273	-0.00581061	-6.43069e-05	-0.00272215	-0.00455812	4.20772e-06	-4.844e-05	-0.0069313	0.00257952	2.3976e-05	-0.00109903	8.14907e-09	0.00110132	-1.00757e-05	0.00184613	0.000500992	0.00118759	0.000265811
CTAAGTGAGCAACAGC.1	-0.00537537	-0.0013292	-0.0788878	-0.0133786	0.012058	0.00295309	0.00109033	0.00351475	-0.000275272	0.00115292	-0.00132936	-0.00376546	-0.00117522	0.00639005	-0.00380355	-0.0777812	0.00529317	1.5229e-05	0.000133203	0.00867184	-0.00324153	0.00582433	0.00215999	-0.0057584	0.00408411	2.10265e-05	0.0650454	-0.000325819	-0.0018292	-0.0127303	0.0159822	-0.0845996	-0.00632121	-6.74574e-05	-0.002722	-0.00610778	1.37836e-07	-3.44012e-05	-0.0204749	0.00275129	1.73785e-05	-0.000733636	8.11997e-09	0.001814	-9.54606e-08	0.00185169	0.000566751	0.00118623	0.00026596
CTAAGTGCATGGGAAC.1	-0.00384632	-0.00129879	-0.0416949	-0.00898052	0.00632215	0.00293596	0.00109173	0.00692371	-0.000250749	0.00116773	-0.00133517	-0.00358666	-0.00117503	0.00632017	-0.00369981	-0.0478274	0.00529504	1.44839e-05	0.000132991	0.00392713	-0.00314655	0.00578566	0.00215319	-0.00559553	0.00412266	5.84349e-05	0.0388902	-0.000325022	-0.00118527	-0.00821991	0.00998851	-0.0435587	-0.00560904	-6.52935e-05	-0.002722	-0.00490147	3.93949e-06	-4.75049e-05	-0.0109819	0.00258257	2.19941e-05	-0.00109334	8.14907e-09	0.00117007	-8.45711e-06	0.00184546	0.000529766	0.00118756	0.00026595
CTACAGAAGAGTACCG.1	-0.0188598	0.000290267	-0.0688997	-0.000263133	0.0173554	0.00293337	0.00112389	0.00676867	-0.000293605	0.00387167	-0.00140642	-0.00503386	-0.00116334	-0.00884339	-0.00731748	-0.0312818	0.0052809	1.62311e-05	0.000134248	-0.00459484	-0.00482655	0.00588359	0.00218794	-0.00541592	0.00403848	5.89974e-05	0.0981089	-0.000364086	-0.00182993	-0.0161013	0.017186	-0.16189	-0.0103026	-8.34964e-05	-0.00272232	-0.0134401	5.49108e-06	-3.32426e-05	-0.0131752	0.00257032	1.3439e-05	0.00244373	8.49832e-09	0.00184206	7.79983e-08	0.00184622	0.000693887	0.00101639	0.000264695
CTACATTCAGTTAGGG.1	-0.00441979	-0.00131896	-0.0971513	-0.00188316	0.00547269	0.00302116	0.00105868	0.00298014	-0.000270791	0.0011668	-0.00122126	-0.00393927	-0.0011757	-0.00346076	-0.00375655	-0.0473172	0.0052958	1.68309e-05	0.000133313	0.00334107	-0.00318124	0.00580746	0.00210706	-0.0055818	0.00409903	8.59201e-05	0.067878	-0.000325074	-0.00149727	-0.0113067	0.0109602	-0.0172282	-0.00620405	-6.66159e-05	-0.00271798	-0.00625035	-1.63354e-06	-3.6465e-05	-0.00195387	0.00258525	2.2836e-05	-0.000825029	8.3819e-09	0.00149468	-1.59163e-06	0.00182959	0.000451207	0.0011857	0.000265941
CTACATTTCGAACGCC.1	-0.0129224	-0.000387097	-0.0805834	0.00101977	0.00892117	0.00296246	0.00111436	0.00387357	-0.000288411	0.00345962	-0.00132312	-0.00492457	-0.00116858	-0.00742946	-0.00832567	-0.0491254	0.00528731	1.45659e-05	0.000134774	0.00191036	-0.00412713	0.00585802	0.00256001	-0.00542974	0.00405994	8.2314e-05	0.0873875	-0.00035142	-0.00164053	-0.0133067	0.0148121	-0.126291	-0.00873243	-7.77706e-05	-0.0027223	-0.00900766	2.64123e-06	-3.47123e-05	-0.0123669	0.00255999	1.49775e-05	0.000757147	8.17818e-09	0.00164095	-8.3819e-07	0.00185131	0.000449538	0.00110426	0.000265045
CTACCCAAGAAATCCA.1	-0.00397103	-0.00124471	-0.0513723	-0.00368299	0.00505465	0.00290478	0.00108228	0.0035184	-0.000252353	0.00116576	-0.00133812	-0.0036746	-0.00117614	0.000528544	-0.00368584	-0.0482093	0.00529563	1.46292e-05	0.000132957	0.00469565	-0.00314279	0.00577501	0.00210671	-0.00560536	0.00413098	5.94333e-05	0.057129	-0.000324523	-0.00123659	-0.00881503	0.0112803	-0.0442258	-0.00527011	-6.46521e-05	-0.002722	-0.00432897	-1.39698e-06	-4.64916e-05	-0.00807014	0.00259259	2.22884e-05	-0.00102175	8.09086e-09	0.00122048	-4.53624e-06	0.0018382	0.000442371	0.00118752	0.000265963
CTACCCAAGTAGATCA.1	-0.00371006	-0.00125534	-0.0504574	-0.00149036	0.0039603	0.00290684	0.00108031	0.00451868	-0.000250536	0.00117013	-0.00133401	-0.00360735	-0.00117616	-0.000641383	-0.00367138	-0.0404129	0.00529626	1.44467e-05	0.000133013	0.0032029	-0.00312789	0.00577267	0.0020979	-0.00559194	0.00413289	7.31386e-05	0.039416	-0.000324344	-0.00111348	-0.00773353	0.00968925	-0.0166533	-0.00596051	-6.42673e-05	-0.002722	-0.00415131	-6.51926e-07	-4.96451e-05	-0.00567833	0.00257879	2.49036e-05	-0.00107779	8.14907e-09	0.00110371	-7.82381e-06	0.00184762	0.000460327	0.00118759	0.000265963
CTACCTGGTTTAGACC.1	-0.0076433	-0.000771905	-0.0993727	0.00108993	0.00717087	0.00291444	0.00111187	0.0038653	-0.000276065	0.00187844	-0.00130823	-0.0046596	-0.00114507	-0.00531194	-0.00523064	-0.043645	0.00526032	1.44579e-05	0.000134343	0.00185145	-0.00365616	0.00582204	0.0023387	-0.00549644	0.00409232	0.000102535	0.0773778	-0.000343492	-0.00142614	-0.0108551	0.0116399	-0.0806759	-0.00829554	-7.14326e-05	-0.0027228	-0.00683576	-4.84288e-08	-4.58825e-05	-0.00631851	0.00255872	1.99787e-05	-7.57687e-05	8.14907e-09	0.00142614	-4.51668e-06	0.00184429	0.000434399	0.00115431	0.000263952
CTACCTGTCGATCCCT.1	-0.0221352	0.00299072	-0.0484902	-0.00206611	0.0204906	0.00304264	0.001197	0.0042841	-0.000297586	0.00245777	-0.00119073	-0.00458449	-0.000880769	-0.01539	-0.00804938	-0.0277132	0.00495441	2.16179e-05	0.000135202	-0.00902661	-0.00796979	0.00592231	0.00274115	-0.00531451	0.00402765	2.7759e-05	0.0724502	-0.000382965	-0.0025689	-0.0238079	0.0286765	-0.147685	-0.0156451	-0.000104099	-0.002722	-0.0251338	6.69714e-06	-2.03047e-05	-0.00497162	0.0026639	1.22264e-05	0.00555417	1.08848e-08	0.00258493	1.44672e-05	0.00179546	0.00192022	0.000881381	0.000251545
CTAGACAAGGTAGTAT.1	-0.00908147	-0.000206757	-0.0899023	0.000768872	0.00847152	0.0029195	0.00111486	0.00630929	-0.000277425	0.00239794	-0.00134476	-0.00453671	-0.00117269	-0.0063419	-0.00514163	-0.0267463	0.00528891	1.47484e-05	0.000134164	-0.000864681	-0.00422193	0.00584092	0.00215755	-0.00549737	0.00407713	9.87463e-05	0.087074	-0.000346353	-0.00153383	-0.0120822	0.0112851	-0.0853673	-0.00828725	-7.46269e-05	-0.00272315	-0.00862145	3.49786e-05	-4.39025e-05	-0.00685886	0.00256082	1.84141e-05	-5.34542e-05	8.14907e-09	0.0015339	-1.18418e-06	0.00184502	0.000457957	0.00113111	0.000264695
CTAGACAGTAGTTACC.1	-0.00920984	-0.000442055	-0.104109	1.21146e-05	0.00863439	0.0029179	0.0011234	0.00474406	-0.000277925	0.00160081	-0.00134977	-0.00425098	-0.00116915	-0.0066258	-0.00484221	-0.0402601	0.005282	1.48043e-05	0.000134164	0.000924231	-0.00406103	0.00583214	0.00216011	-0.0055169	0.00408164	8.30218e-05	0.0858491	-0.000345802	-0.00162501	-0.0128246	0.0120398	-0.077526	-0.00965708	-7.31866e-05	-0.00272283	-0.00709483	4.13694e-06	-3.73311e-05	-0.00818533	0.0025688	1.90102e-05	0.000126302	8.3819e-09	0.001625	-8.09319e-07	0.00184948	0.00046213	0.00114779	0.0002636
CTAGACAGTCGGTAAG.1	-0.0105508	-0.000455274	-0.097884	0.000419281	0.0164613	0.00292967	0.00112232	0.00555011	-0.000289887	0.00153125	-0.00139609	-0.00459054	-0.00112584	-0.00941352	-0.00475787	-0.0323793	0.00524537	1.47857e-05	0.000134051	-0.00223265	-0.00407147	0.0058578	0.00218014	-0.00552419	0.00406133	6.69938e-05	0.110816	-0.000353007	-0.00183375	-0.0155509	0.0146593	-0.110201	-0.0100342	-7.95997e-05	-0.00272198	-0.00940767	5.96512e-06	-3.33264e-05	-0.0158769	0.00257558	1.59182e-05	0.000788124	8.17818e-09	0.00183681	2.79397e-09	0.00184205	0.000542328	0.00112204	0.000265574
CTAGGTACACATTACG.1	-0.00363073	-0.00124676	-0.0789968	-0.000594905	0.00190182	0.00293454	0.00106791	0.00445166	-0.000259387	0.00117029	-0.00130124	-0.00378962	-0.0011758	-0.00209927	-0.00370364	-0.0547834	0.00529619	1.51508e-05	0.00013309	0.00313912	-0.00314016	0.00578324	0.00213795	-0.00559211	0.00411837	0.000107838	0.0420669	-0.000325209	-0.00125437	-0.00848396	0.00886939	-0.0114542	-0.0071738	-6.58897e-05	-0.00271266	-0.00360411	-3.4105e-06	-4.43701e-05	-0.00181463	0.00258598	2.55965e-05	-0.000957191	8.14907e-09	0.00125189	-5.91273e-06	0.00183103	0.000419423	0.00118691	0.000265962
CTATAGGCATAAGCGG.1	-0.00987389	-5.24111e-05	-0.0850827	0.000910145	0.0100829	0.00292605	0.00111183	0.00632087	-0.000278965	0.00352171	-0.0013425	-0.00477595	-0.00117424	-0.00651062	-0.00585097	-0.0294472	0.00529223	1.49161e-05	0.000134222	-0.00165654	-0.00439058	0.00585268	0.00222483	-0.00547446	0.00406845	9.34787e-05	0.0859151	-0.000344483	-0.00153706	-0.0123488	0.0121173	-0.103846	-0.00849637	-7.59687e-05	-0.00272303	-0.00860947	1.35656e-05	-4.34443e-05	-0.00879642	0.0025618	1.72369e-05	0.00051816	8.3819e-09	0.00153733	-9.68808e-07	0.00184537	0.000448465	0.00112003	0.000265075
CTATAGGGTGGATTTC.1	-0.00349389	-0.0012893	-0.0469768	-0.00172333	0.00435591	0.00292382	0.00107758	0.00452166	-0.000249221	0.0011709	-0.00133498	-0.00363212	-0.00117617	8.50782e-05	-0.0036748	-0.042256	0.00529649	1.44579e-05	0.000133026	0.00361075	-0.00310868	0.00577092	0.00209811	-0.00558434	0.00413456	7.59698e-05	0.0292224	-0.00032465	-0.00110095	-0.00726696	0.00895655	-0.013879	-0.00642057	-6.45333e-05	-0.002722	-0.00380601	-3.09199e-06	-4.9537e-05	-0.00603095	0.00257131	2.49296e-05	-0.00109982	8.14907e-09	0.00109059	-8.65827e-06	0.00185383	0.000443205	0.00118761	0.000265963
CTATAGGGTTTAAGGA.1	-0.00380753	-0.00138908	-0.050422	-0.00634748	0.00756826	0.00303164	0.0010964	0.00440794	-0.000250778	0.00116789	-0.00129612	-0.00360505	-0.00117609	0.00374459	-0.00367924	-0.0570048	0.00529652	1.45175e-05	0.000132985	0.00461835	-0.00316592	0.0057935	0.00211503	-0.00559416	0.0041142	5.52777e-05	0.0375001	-0.000324836	-0.00116651	-0.00817054	0.0117598	-0.0377569	-0.00601639	-6.48337e-05	-0.002722	-0.00401688	1.6652e-06	-4.89391e-05	-0.0124927	0.00258086	2.22437e-05	-0.00113099	8.11997e-09	0.00115329	-7.65594e-06	0.00185018	0.000518456	0.00118756	0.000265827
CTATCTAGTACAAACA.1	-0.0169926	-0.000162348	-0.0594381	0.000936844	0.0105601	0.00296311	0.00112863	0.00713502	-0.000290215	0.00477565	-0.00137481	-0.00541443	-0.00117382	-0.00825593	-0.0110167	-0.0407768	0.0052916	1.6436e-05	0.000134228	-0.00111144	-0.0043747	0.00588996	0.00262786	-0.0054068	0.00404084	6.21416e-05	0.0851684	-0.000375202	-0.00170958	-0.0147004	0.0158304	-0.167763	-0.00900835	-8.59412e-05	-0.00272267	-0.00973684	5.84777e-06	-3.42429e-05	-0.0132399	0.00257126	1.2951e-05	0.00206486	8.44011e-09	0.00171981	-1.21072e-08	0.0018528	0.000497729	0.00102229	0.00026466
CTATCTATCATGGCCG.1	-0.00446282	-0.00135157	-0.0666424	-0.0085614	0.00894457	0.0029714	0.00110337	0.00406561	-0.000261806	0.00116284	-0.00133408	-0.00361052	-0.00117562	0.00444115	-0.00372865	-0.084191	0.00529511	1.46031e-05	0.000133138	0.00885145	-0.0032065	0.00579538	0.00210485	-0.00572418	0.00411392	3.41758e-05	0.042678	-0.000324918	-0.00141807	-0.00969586	0.0123233	-0.0601441	-0.00709703	-6.5656e-05	-0.002722	-0.00494572	-1.92411e-06	-4.0628e-05	-0.0167289	0.00271213	2.09305e-05	-0.0010943	7.85803e-09	0.00140108	-1.7737e-06	0.00185125	0.000541568	0.00118617	0.000265956
CTATCTATCGGTCTGG.1	-0.00669907	-0.00143033	-0.080715	-0.0201812	0.01809	0.00303397	0.00110806	0.000640674	-0.000278229	0.00114265	-0.00133587	-0.00368144	-0.00117512	0.0116221	-0.003814	-0.0810872	0.00529187	1.59666e-05	0.000132989	0.0113903	-0.0033466	0.00585019	0.00217476	-0.00575915	0.00406278	8.5762e-06	0.0630406	-0.00032731	-0.00201056	-0.0141955	0.0207509	-0.0993056	-0.00637333	-6.96381e-05	-0.00272209	-0.00715703	3.8445e-06	-2.83662e-05	-0.0295063	0.00275084	1.508e-05	-0.000900082	8.03266e-09	0.00200197	6.40284e-09	0.00185048	0.000566438	0.00118721	0.000265952
CTCAACCCAGTCGAGA.1	-0.00425442	-0.00132657	-0.0497103	-0.00742792	0.00621649	0.00296326	0.00109105	0.00399244	-0.000253568	0.00116669	-0.00133102	-0.00364763	-0.00117613	0.0046603	-0.00369759	-0.0685328	0.0052963	1.45584e-05	0.000133006	0.00605767	-0.00317173	0.00579027	0.0021164	-0.00560455	0.0041177	4.93564e-05	0.0378339	-0.000324717	-0.00124601	-0.00838764	0.0115146	-0.0423939	-0.00616636	-6.49001e-05	-0.002722	-0.00471711	-2.77534e-07	-4.74472e-05	-0.0117808	0.00259145	2.18581e-05	-0.00111194	8.03266e-09	0.00123274	-6.58119e-06	0.00185559	0.000522301	0.00118742	0.000265943
CTCAACCGTCCACTCT.1	-0.00456402	-0.00130092	-0.065385	-0.0104149	0.0111928	0.00292725	0.00110098	0.00210113	-0.000262286	0.00115969	-0.00133452	-0.00369294	-0.00117456	0.00570958	-0.00373043	-0.087963	0.0052938	1.5188e-05	0.000132902	0.00624701	-0.00320384	0.00579747	0.00210363	-0.00566481	0.00411085	3.65917e-05	0.0659689	-0.000324948	-0.00148108	-0.0103596	0.013941	-0.07046	-0.00661596	-6.5938e-05	-0.002722	-0.00522029	8.84756e-07	-3.79048e-05	-0.0167451	0.00265327	1.99992e-05	-0.000957523	8.09086e-09	0.00146445	-1.06241e-06	0.00185022	0.000487745	0.00118723	0.000265962
CTCAACCGTGCGAGTA.1	-0.00694848	-0.00142186	-0.0852009	-0.0196383	0.0211113	0.00302847	0.00109696	0.00160256	-0.000282668	0.00113793	-0.00132738	-0.00377034	-0.00117472	0.0101588	-0.00384833	-0.0676575	0.00529111	1.71699e-05	0.000132985	0.0107605	-0.00331766	0.00585488	0.00222977	-0.00581074	0.00405695	8.43412e-06	0.0553484	-0.000328226	-0.00204408	-0.015221	0.0210662	-0.108119	-0.00629421	-7.00525e-05	-0.002722	-0.00830364	5.2806e-06	-2.73101e-05	-0.031139	0.0028035	1.49459e-05	-0.000769105	8.26549e-09	0.0020349	8.03266e-09	0.00185158	0.000601187	0.00118694	0.000265952
CTCAACCTCCGCGGAT.1	-0.00402806	-0.00128174	-0.0370318	-0.00947311	0.00521709	0.0029238	0.00109025	0.00623954	-0.0002524	0.00116628	-0.00134147	-0.00361866	-0.00117569	0.00677403	-0.00370411	-0.0449493	0.00529558	1.45398e-05	0.000132995	0.00486272	-0.00314466	0.00578436	0.00217998	-0.00559549	0.00412232	5.49834e-05	0.0417308	-0.000324821	-0.00120445	-0.00829168	0.0103995	-0.0475652	-0.00564847	-6.49499e-05	-0.002722	-0.00527892	1.71736e-06	-4.68977e-05	-0.0102515	0.00258304	2.2091e-05	-0.00108067	8.14907e-09	0.00118895	-7.99517e-06	0.00184543	0.000529736	0.00118749	0.000265963
CTCAAGACATCACGGC.1	-0.019024	-0.00254922	-0.0277193	-0.0414794	0.00123146	0.00434587	0.00131775	0.00869946	-0.000299391	0.000888571	-0.0011035	-0.00330448	-0.00117533	0.0167165	-0.00449818	-0.0410782	0.00526808	3.06554e-05	0.000132831	0.0590562	-0.0041817	0.00591348	0.0056564	-0.00615025	0.00401347	-0.000214942	-0.0352108	-0.000346517	-0.00429174	-0.0295675	0.0468606	-0.142656	-0.00222138	-9.29693e-05	-0.00272384	-0.0415598	3.2622e-05	1.98837e-06	-0.0735953	0.00326168	-1.39959e-05	-0.00174072	-3.67407e-07	0.00399078	1.21894e-05	0.00185706	0.00316787	0.00119217	0.000265773
CTCAAGATCCGCGGAT.1	-0.0148458	0.00175369	-0.0689774	-0.00233387	0.0239053	0.00310279	0.00122428	-0.00147731	-0.000297433	0.00148026	-0.00143378	-0.0040851	-0.00110311	-0.0142883	-0.0055662	-0.0194729	0.00518209	3.01953e-05	0.000133876	-0.00408584	-0.0068393	0.00591526	0.00233467	-0.00546335	0.00403324	2.03382e-05	0.102204	-0.000354676	-0.00227618	-0.0225177	0.0294375	-0.13066	-0.0150461	-9.53733e-05	-0.00272459	-0.025184	6.86664e-06	-2.30782e-05	-0.0247573	0.00262337	1.25431e-05	0.00416065	1.32713e-08	0.00228788	4.95464e-06	0.00181142	0.00185794	0.00108799	0.000253795
CTCAATTGTGATACCT.1	-0.00344199	-0.00122185	-0.0448566	-0.00290022	0.0028689	0.00290939	0.0010766	0.00529849	-0.000249129	0.00117131	-0.00133446	-0.00364399	-0.00117617	0.00130625	-0.00367829	-0.0276373	0.00529653	1.46888e-05	0.000133043	0.00371282	-0.00315184	0.00577148	0.00208116	-0.00557627	0.00413351	8.23718e-05	0.0240007	-0.000324322	-0.00107039	-0.00723775	0.00822574	-0.0101368	-0.00617228	-6.39982e-05	-0.00272201	-0.00409269	-3.31551e-06	-4.90528e-05	-0.00468025	0.00256322	2.62558e-05	-0.00108824	8.14907e-09	0.00106359	-1.19403e-05	0.00185418	0.000489801	0.00118758	0.000265941
CTCACTGCATAGCACT.1	-0.00402276	-0.00128251	-0.0585278	-0.00824519	0.00341936	0.00290979	0.0010918	0.00344251	-0.000252656	0.00116711	-0.00134283	-0.00361266	-0.00117606	0.00568649	-0.0036962	-0.0660731	0.00529596	1.48788e-05	0.000132984	0.00712918	-0.00315613	0.00577909	0.00213481	-0.00560838	0.00412711	5.83101e-05	0.0394519	-0.000324441	-0.00120264	-0.00814974	0.0108195	-0.0437194	-0.00628029	-6.47017e-05	-0.00272201	-0.00444192	-1.53109e-06	-4.70802e-05	-0.00891805	0.00259501	2.26684e-05	-0.00107644	7.85803e-09	0.00118783	-5.73928e-06	0.00185491	0.000464395	0.00118744	0.000265963
CTCACTGCATGGTACT.1	-0.00356049	-0.00135779	-0.048205	-0.00136087	0.000343766	0.00300502	0.00106685	0.0052513	-0.000254494	0.00117257	-0.00131597	-0.00366199	-0.00117603	-0.000216242	-0.00370761	-0.0477716	0.00529655	1.44802e-05	0.000133188	0.00336384	-0.00312676	0.00577758	0.00211695	-0.00557031	0.00412907	0.000110013	0.0191081	-0.000324344	-0.00114506	-0.00723731	0.00773657	0.000185341	-0.00740633	-6.44505e-05	-0.00272188	-0.00340208	2.51457e-07	-4.92781e-05	-0.000793487	0.00256	2.6159e-05	-0.00107067	8.14907e-09	0.00114181	-9.70718e-06	0.00185494	0.000416592	0.00118735	0.000265962
CTCAGAACAGGATCTT.1	-0.0201834	0.000830142	-0.0505164	-0.00335496	0.0236862	0.00309843	0.00125056	-0.000417267	-0.000297908	0.00166224	-0.00149088	-0.00417285	-0.000837294	-0.0136181	-0.00890126	-0.0215002	0.00492876	2.13757e-05	0.000135981	-0.000185009	-0.0059631	0.00592912	0.00231179	-0.00541151	0.00402982	1.63857e-05	0.065132	-0.00037854	-0.00238328	-0.0229038	0.0269594	-0.11693	-0.0160446	-0.000100994	-0.00273105	-0.0155331	6.33532e-06	-1.48378e-05	-0.0176602	0.00265965	1.20699e-05	0.00825189	1.11759e-08	0.00237497	6.17886e-06	0.00177465	0.0013912	0.000871159	0.000257984
CTCAGGGTCTAGTTCT.1	-0.00319704	-0.0012739	-0.0246546	0.000640797	-0.00109189	0.00290561	0.00107105	0.00592617	-0.000247701	0.00117473	-0.00133387	-0.00358601	-0.00117615	-0.00117613	-0.00366247	-0.0153751	0.00529684	1.46218e-05	0.000133079	0.00238478	-0.00309038	0.00576377	0.00208687	-0.00556968	0.00414112	0.00013472	-0.00082343	-0.000324262	-0.00100153	-0.00613285	0.00673109	0.0219575	-0.00704911	-6.37902e-05	-0.002722	-0.00279766	-4.09968e-06	-5.15953e-05	0.0015434	0.00255643	2.90126e-05	-0.00108882	8.14907e-09	0.00100229	-1.49766e-05	0.0018632	0.000413775	0.00118823	0.000265941
CTCAGTCAGTGTACAA.1	-0.00493139	-0.00135272	-0.102415	-0.00280249	0.00701662	0.00303751	0.00107535	0.0019625	-0.000275159	0.00116359	-0.00120284	-0.00397916	-0.0011754	-0.00351333	-0.00384779	-0.0384926	0.00529572	1.76355e-05	0.000133537	0.00321864	-0.00321199	0.00582476	0.00211103	-0.00557081	0.00408698	6.95065e-05	0.0733834	-0.000325194	-0.00158398	-0.0123146	0.0125309	-0.0253891	-0.00679561	-6.808e-05	-0.00272173	-0.00742167	1.30385e-07	-3.58969e-05	-0.0039143	0.00258157	2.2009e-05	-0.000447344	8.61473e-09	0.00158296	-8.28644e-07	0.00184219	0.000479087	0.00118305	0.000265898
CTCAGTCCATGAAGGC.1	-0.00336079	-0.00125856	-0.0459164	-0.000498447	-0.000459414	0.00290867	0.00107197	0.00495647	-0.000253045	0.00117301	-0.0013278	-0.00367805	-0.00117615	-0.00116803	-0.00367742	-0.0301718	0.00529659	1.51433e-05	0.000132965	0.00315907	-0.00310144	0.00577245	0.00208559	-0.0055763	0.00413278	0.000121564	0.0312648	-0.000324516	-0.00112812	-0.00734343	0.00792373	0.00695166	-0.00710247	-6.4975e-05	-0.00271866	-0.00284564	-3.57255e-06	-4.95389e-05	0.000566751	0.00256538	2.73176e-05	-0.00102578	8.14907e-09	0.00112479	-1.03274e-05	0.00184248	0.000414088	0.00118755	0.000265962
CTCAGTCTCAGCTTCC.1	-0.00326912	-0.00126883	-0.0268116	7.51903e-05	-0.00100839	0.00290637	0.00107271	0.0058905	-0.000247805	0.0011745	-0.00133138	-0.00357997	-0.00117616	-0.00068322	-0.00366402	-0.0202097	0.00529685	1.44988e-05	0.000133082	0.00253906	-0.00309073	0.00576471	0.0020829	-0.00557084	0.0041403	0.000130724	0.000190027	-0.000324277	-0.00100448	-0.00619802	0.00679344	0.0199464	-0.00705809	-6.38331e-05	-0.002722	-0.0028102	-4.04753e-06	-5.15804e-05	0.00162578	0.00255767	2.87369e-05	-0.0010859	8.14907e-09	0.00100458	-1.42688e-05	0.00185675	0.000414029	0.00118848	0.000265963
CTCAGTCTCCCTCAAC.1	-0.00372013	-0.00128958	-0.0587779	-0.00540312	0.00322772	0.00291756	0.00108581	0.00404037	-0.000251056	0.0011691	-0.00133915	-0.00361085	-0.00117613	0.00336733	-0.00368546	-0.057057	0.00529628	1.46031e-05	0.000133015	0.00591105	-0.00313634	0.00577417	0.00214691	-0.00559427	0.0041318	6.54403e-05	0.0322118	-0.000324471	-0.00114544	-0.00763407	0.00979708	-0.0289176	-0.00641653	-6.46032e-05	-0.00272204	-0.00414184	-2.27801e-06	-4.82462e-05	-0.00733715	0.00258093	2.38121e-05	-0.00109841	8.09086e-09	0.00113321	-7.3805e-06	0.00185527	0.000456229	0.00118754	0.000265963
CTCAGTCTCGCAGTCG.1	-0.00557308	-0.00136822	-0.100258	-0.00851382	0.0125287	0.0030184	0.00107697	0.00205324	-0.000277454	0.00115401	-0.0012994	-0.00386028	-0.0011742	0.0011777	-0.00386199	-0.0542884	0.00529293	1.79745e-05	0.000133211	0.00557241	-0.00324701	0.00583038	0.0022253	-0.00565067	0.0040804	3.59826e-05	0.086729	-0.000326252	-0.00177271	-0.0131865	0.0160621	-0.0716019	-0.00829057	-6.82465e-05	-0.00272194	-0.00725478	2.60025e-06	-3.24231e-05	-0.0164763	0.00264743	1.88965e-05	-0.000225976	8.3819e-09	0.00176577	-1.04541e-07	0.00184663	0.000560448	0.00118527	0.00026588
CTCATCGAGTCCTGCG.1	-0.00658758	-0.00154334	-0.0895002	-0.00379917	0.0111459	0.00314865	0.00109677	0.000853265	-0.000294282	0.0011409	-0.0009321	-0.00401337	-0.00116897	-0.00708877	-0.0040586	-0.0265498	0.00528055	3.44263e-05	0.000132712	0.000758196	-0.00329856	0.00587802	0.00279691	-0.0055054	0.00406028	5.18188e-05	0.0848486	-0.00032731	-0.00210308	-0.0169956	0.0198852	-0.0674936	-0.0110548	-7.83056e-05	-0.00272298	-0.0118571	4.53368e-06	-3.241e-05	-0.00757527	0.00258934	1.52215e-05	0.00157095	1.35042e-08	0.00209514	-3.95812e-09	0.00183524	0.000546679	0.00117472	0.000262704
CTCATCGGTTCGGTAT.1	-0.00705564	-0.00133476	-0.112123	-0.00455111	0.0172721	0.00304311	0.00109497	0.00136221	-0.000285494	0.00114692	-0.00126836	-0.00394858	-0.00115846	-0.00464354	-0.00394196	-0.0399267	0.00527519	2.22549e-05	0.000133211	0.000946322	-0.00336625	0.00585624	0.00231158	-0.00558677	0.00405971	4.63799e-05	0.098947	-0.000331348	-0.00184531	-0.0151358	0.0187678	-0.0820203	-0.010414	-7.27666e-05	-0.00272188	-0.00985783	5.59259e-06	-3.08454e-05	-0.0185045	0.00259683	1.80285e-05	0.000626445	9.08039e-09	0.00184444	7.79983e-09	0.00184235	0.000653729	0.00117313	0.000264753
CTCATCGTCTGATGGT.1	-0.0142336	0.000391958	-0.0931975	0.000654985	0.0203673	0.00298617	0.00118582	0.00206239	-0.000295446	0.00161046	-0.00138583	-0.00452344	-0.00115578	-0.0128094	-0.00593722	-0.0430644	0.00527149	1.60635e-05	0.000134382	0.000719522	-0.00514789	0.00588186	0.00218121	-0.00547683	0.00404175	5.18449e-05	0.0970521	-0.000370575	-0.00212144	-0.0186001	0.0196816	-0.148583	-0.0114477	-8.54799e-05	-0.0027228	-0.0101062	1.14366e-06	-2.15638e-05	-0.0194716	0.00257848	1.40425e-05	0.00297774	8.90577e-09	0.00213461	2.09082e-07	0.00183882	0.000653356	0.0009351	0.000264172
CTCATGCCACAAATGA.1	-0.00379628	-0.00130089	-0.0394114	-0.00892143	0.00611549	0.00293576	0.00108616	0.00625527	-0.000249399	0.00116832	-0.00133547	-0.00359506	-0.0011761	0.00652282	-0.00369729	-0.0418496	0.005296	1.49719e-05	0.000132998	0.00467926	-0.00312578	0.00578407	0.00210885	-0.00559615	0.00412286	5.50803e-05	0.0330543	-0.00032465	-0.00113824	-0.00797823	0.00984397	-0.0434758	-0.00585439	-6.46017e-05	-0.00272216	-0.00518244	5.46034e-06	-4.73e-05	-0.0106015	0.00258293	2.27131e-05	-0.001093	8.14907e-09	0.00112713	-9.28226e-06	0.00185319	0.000555232	0.00118741	0.000265902
CTCATGCGTACGACAG.1	-0.00357884	-0.00122945	-0.0382579	-0.000714374	0.00411651	0.00290875	0.00107538	0.00537207	-0.000248723	0.00116958	-0.00133753	-0.00361166	-0.00117617	-0.00102129	-0.00366915	-0.0326026	0.00529606	1.44504e-05	0.000133026	0.00348596	-0.00314458	0.00577342	0.00208254	-0.00558636	0.00413221	8.39084e-05	0.029535	-0.000324337	-0.00107856	-0.00734385	0.00886772	-0.0206294	-0.00605987	-6.40908e-05	-0.00272201	-0.00454105	-1.45659e-06	-4.99971e-05	-0.00600323	0.0025734	2.46465e-05	-0.00110003	8.11997e-09	0.00106842	-1.05135e-05	0.00184703	0.00050436	0.00118761	0.000265844
CTCATGCTCGCCTATC.1	-0.0122069	-0.000239261	-0.0783998	0.000807209	0.0100289	0.00294062	0.00110454	0.00505166	-0.000284605	0.00507982	-0.00133153	-0.00487868	-0.00117275	-0.00713319	-0.00826724	-0.0420464	0.00529296	1.45845e-05	0.00013449	-0.000110944	-0.00423734	0.00585725	0.00235098	-0.00542587	0.00406133	9.00216e-05	0.0905444	-0.000345817	-0.0016197	-0.0131776	0.0139163	-0.138411	-0.0089218	-7.72688e-05	-0.00272209	-0.00910619	4.28036e-06	-3.65321e-05	-0.0118763	0.00255731	1.53054e-05	0.00087918	8.20728e-09	0.00162029	-6.48433e-07	0.00185245	0.000444457	0.00109403	0.000265522
CTCCAACAGCAGTCTT.1	-0.00448736	-0.00129148	-0.0950733	-0.00236045	0.00655297	0.00300348	0.0010791	0.00292886	-0.000273257	0.00116445	-0.00122088	-0.0039231	-0.00117553	-0.0030379	-0.00387702	-0.0534267	0.0052956	1.82278e-05	0.0001335	0.00324401	-0.00326177	0.00582058	0.00212644	-0.00559264	0.00409461	7.57314e-05	0.0681503	-0.000325462	-0.00150632	-0.011334	0.0110907	-0.0320884	-0.00742008	-6.91022e-05	-0.00272191	-0.00589889	-1.38767e-06	-3.79235e-05	-0.00226119	0.00260559	2.25417e-05	-0.00033474	8.84756e-09	0.00150528	-1.38837e-06	0.00183484	0.000461459	0.00118358	0.000265872
CTCCAACTCACCGGGT.1	-0.00350958	-0.0012787	-0.0463404	-0.00040258	0.000303737	0.00291681	0.00107518	0.00522663	-0.000251236	0.00117136	-0.00132433	-0.00363791	-0.00117608	-0.000947595	-0.00368131	-0.047792	0.00529656	1.48527e-05	0.000132998	0.003638	-0.00311846	0.00576215	0.00219445	-0.00558583	0.00412801	0.0001022	0.0135737	-0.000324836	-0.00113019	-0.00698099	0.00788062	-0.00761038	-0.0077363	-6.4772e-05	-0.00270509	-0.00307554	-3.63775e-06	-5.03901e-05	-0.000865132	0.00257711	2.65092e-05	-0.00105648	8.14907e-09	0.0011282	-1.05954e-05	0.0018528	0.00042066	0.00118773	0.000265962
CTCCAACTCTCGTCGT.1	-0.00449058	-0.00110406	-0.069526	0.00102092	0.000266232	0.00290505	0.00109184	0.00518157	-0.000259393	0.00122687	-0.00133786	-0.0037658	-0.00117371	-0.00293869	-0.0038199	-0.0280781	0.00529301	1.45994e-05	0.000133583	0.00242115	-0.00327083	0.0057858	0.00208464	-0.00555122	0.0041215	0.000127167	0.0396853	-0.000327868	-0.00117351	-0.00766708	0.0081061	0.00151402	-0.00700523	-6.56007e-05	-0.002722	-0.00398153	-1.47522e-06	-4.79482e-05	2.43187e-05	0.00255644	2.70791e-05	-0.000940077	8.14907e-09	0.00117565	-9.83104e-06	0.00185695	0.000429168	0.00116828	0.000265531
CTCCACACATGTTACG.1	-0.00369805	-0.00136068	-0.0474858	-0.00684897	0.0068962	0.00300372	0.00108987	0.00487665	-0.000250623	0.00116752	-0.00131564	-0.00360526	-0.0011761	0.0042065	-0.00368765	-0.0518772	0.0052965	1.4741e-05	0.000132978	0.00478985	-0.00315049	0.00579112	0.00211436	-0.00559333	0.00411642	5.64139e-05	0.0382124	-0.000324896	-0.00115853	-0.00822019	0.0116017	-0.04103	-0.00589324	-6.48479e-05	-0.00272201	-0.00416118	2.5779e-06	-4.88088e-05	-0.0120794	0.00257983	2.21021e-05	-0.00111495	8.11997e-09	0.0011456	-8.07876e-06	0.00184979	0.000515208	0.00118757	0.000265898
CTCCACAGTTCGGTTA.1	-0.0105131	0.00015417	-0.0758641	0.00115373	0.00949407	0.00292952	0.00110627	0.00622742	-0.000280479	0.00568388	-0.0013427	-0.00520531	-0.00117484	-0.00636993	-0.00698673	-0.0369998	0.00529521	1.50762e-05	0.000134164	-0.00199066	-0.00459516	0.005864	0.00223006	-0.00547309	0.00405973	8.98708e-05	0.0865678	-0.000341995	-0.00148682	-0.0123956	0.0130103	-0.123936	-0.00934869	-7.71103e-05	-0.00272244	-0.00914934	5.58514e-06	-4.37908e-05	-0.00940674	0.00256436	1.63075e-05	0.00116901	8.41101e-09	0.00148705	-8.54721e-07	0.0018487	0.000449821	0.00112207	0.000265708
CTCCATGGTCTTAGTG.1	-0.00715554	-0.00145826	-0.0766916	-0.024744	0.0206206	0.00305279	0.00109472	0.00326762	-0.000275373	0.00113855	-0.00135354	-0.00362297	-0.00117487	0.0175406	-0.00380056	-0.0911316	0.00529238	1.4849e-05	0.000133093	0.0125807	-0.00329557	0.0058442	0.00228918	-0.00593793	0.0040698	7.89855e-06	0.0393324	-0.000328643	-0.00181296	-0.0127818	0.0184798	-0.124624	-0.00758537	-6.94565e-05	-0.002722	-0.00697473	2.91876e-06	-3.32221e-05	-0.0345378	0.00292621	1.5514e-05	-0.000866514	8.03266e-09	0.00179529	-4.88944e-09	0.00185122	0.000690237	0.00118725	0.000265956
CTCCCAATCAGGGTAG.1	-0.00375227	-0.00125173	-0.0495599	-0.00109985	0.00347226	0.00290812	0.00108344	0.00399868	-0.000251897	0.00117095	-0.00133209	-0.00360105	-0.00117614	-0.00104785	-0.00366837	-0.0411109	0.00529632	1.4443e-05	0.00013301	0.00294301	-0.00313525	0.00577134	0.00208608	-0.00560127	0.00413389	7.31107e-05	0.0404837	-0.000324307	-0.00111007	-0.00774224	0.0100003	-0.0107702	-0.00615701	-6.41569e-05	-0.002722	-0.00386816	-2.31899e-06	-4.97382e-05	-0.00490636	0.00258803	2.5589e-05	-0.0010719	8.14907e-09	0.00110147	-7.04732e-06	0.00184453	0.000449687	0.00118759	0.000265963
CTCCCTCCAACCTAAC.1	-0.00415233	-0.00126906	-0.027959	-0.0134492	0.0054425	0.00294652	0.00109681	0.00688072	-0.000250682	0.00116145	-0.00134984	-0.00361788	-0.00117615	0.0102734	-0.00373816	-0.0514322	0.00529597	1.51247e-05	0.000132976	0.00613526	-0.00319661	0.00579116	0.00215507	-0.00560159	0.00411721	4.27719e-05	0.0449783	-0.000325395	-0.00123577	-0.00875832	0.0120334	-0.0617866	-0.00558138	-6.52272e-05	-0.00272201	-0.00602663	3.31178e-06	-4.76055e-05	-0.0129061	0.00258924	2.01296e-05	-0.00107544	8.09086e-09	0.00121931	-6.98166e-06	0.00185248	0.000615224	0.00118747	0.000265952
CTCCCTCGTGTGTCCG.1	-0.0300341	0.00326068	0.000973579	-0.00525114	0.017139	0.00376385	0.00102115	-0.000584838	-0.000333916	0.00206026	-0.000950404	-0.00463036	-0.000942422	-0.0219151	-0.0105725	-0.00180917	0.00499508	3.33944e-05	0.000135701	-0.0076272	-0.0097093	0.00602769	0.00404403	-0.00516163	0.00395294	1.15256e-05	0.0349348	-0.000397829	-0.00364488	-0.0328141	0.0447012	-0.0545245	-0.0225005	-0.00014693	-0.00272198	-0.0299894	1.39661e-05	-9.0925e-06	-0.01005	0.00269232	1.01998e-05	0.0128677	2.468e-08	0.00347003	8.69376e-05	0.00173183	0.00270478	0.000814333	0.000247788
CTCCGATAGTTACTCG.1	-0.00391392	-0.00127866	-0.061137	-0.0066648	0.00608864	0.00290394	0.00108709	0.00233066	-0.000254209	0.00116634	-0.00133683	-0.00369408	-0.00117604	0.00357501	-0.00368425	-0.0708278	0.00529559	1.50129e-05	0.000132957	0.00492096	-0.00314218	0.00578215	0.0020865	-0.00563338	0.00412482	5.60693e-05	0.0496718	-0.000324612	-0.00125813	-0.0087665	0.0116274	-0.0385557	-0.00644213	-6.4844e-05	-0.002722	-0.00381392	6.07222e-07	-4.34481e-05	-0.00908619	0.00262064	2.28174e-05	-0.001028	8.11997e-09	0.00124344	-2.78722e-06	0.00185341	0.000442326	0.00118753	0.000265963
CTCCTTTGTGTCCGGT.1	-0.00420189	-0.00114559	-0.0675081	-0.000157695	0.0024946	0.00293252	0.00107949	0.00511798	-0.000258432	0.001173	-0.00131988	-0.00367871	-0.00117257	-0.00170995	-0.00382028	-0.050563	0.00529216	1.4443e-05	0.000134021	0.00296857	-0.00327435	0.00579213	0.00218406	-0.00556812	0.00411709	0.000110116	0.0299212	-0.000325216	-0.00120046	-0.00753695	0.0080158	0.0162419	-0.00728608	-6.50757e-05	-0.00272128	-0.00445184	4.09782e-08	-5.00735e-05	-0.00209633	0.00256205	2.53953e-05	-0.000922494	8.14907e-09	0.00120147	-7.87014e-06	0.0018546	0.000444606	0.00118211	0.000265568
CTCCTTTGTTAGGAGC.1	-0.00385251	-0.00126988	-0.05375	-0.00471996	0.00303081	0.00290739	0.00108222	0.00433355	-0.000251369	0.00116835	-0.00133837	-0.00361738	-0.00117615	0.00240051	-0.00368304	-0.0470522	0.00529607	1.45994e-05	0.000132993	0.00494831	-0.00312932	0.00577537	0.00214212	-0.00559217	0.00413034	6.68354e-05	0.0409327	-0.000324441	-0.00115322	-0.00792565	0.00992195	-0.0308728	-0.00601976	-6.4456e-05	-0.00272201	-0.00428477	2.71946e-07	-4.9172e-05	-0.00633302	0.00257891	2.35252e-05	-0.0010718	8.11997e-09	0.00114071	-7.04336e-06	0.00185036	0.000457257	0.00118753	0.000265963
CTCTCAGAGCTACGTT.1	-0.0194389	0.00226101	-0.0601921	-0.00170161	0.0192863	0.00303611	0.00119327	0.00341669	-0.00029762	0.00220998	-0.00128347	-0.00439279	-0.000922627	-0.0144944	-0.00709334	-0.0297327	0.00500347	2.28211e-05	0.000134762	-0.00527592	-0.00721277	0.00591467	0.00245586	-0.00537062	0.0040296	2.87518e-05	0.0812588	-0.000368496	-0.00238197	-0.0224066	0.0255724	-0.134882	-0.0146463	-9.69844e-05	-0.00272199	-0.0227961	5.03846e-06	-2.08467e-05	-0.00744742	0.00262566	1.27098e-05	0.00486045	1.12341e-08	0.00238044	7.70576e-06	0.00180025	0.0016879	0.000946045	0.000254396
CTCTGGTAGGTCATTC.1	-0.00389465	-0.0012622	-0.040384	-0.00836448	0.0040711	0.00291741	0.00108417	0.00601872	-0.00025092	0.00116702	-0.00134186	-0.00361623	-0.00117615	0.0058762	-0.00370444	-0.0427086	0.00529613	1.49086e-05	0.000132985	0.00492632	-0.00313887	0.00578162	0.00210193	-0.0056019	0.00412506	6.0074e-05	0.0372912	-0.00032468	-0.00115959	-0.00808909	0.0103691	-0.0464704	-0.00569025	-6.47741e-05	-0.00272215	-0.00514764	3.75509e-06	-4.86504e-05	-0.00876707	0.00258885	2.23182e-05	-0.00107993	8.14907e-09	0.00114623	-8.49809e-06	0.00184797	0.000526607	0.0011875	0.000265963
CTCTGGTGTCATAACC.1	-0.026876	0.00273701	-0.0505113	-0.00455851	0.0166323	0.00313416	0.00125596	-0.00218018	-0.000301598	0.0026108	-0.00133591	-0.00426986	-0.000693327	-0.0165691	-0.0230997	-0.0118491	0.00479363	1.59442e-05	0.00013767	0.00630903	-0.00811877	0.00592464	0.00301014	-0.00520653	0.00401828	1.35805e-05	0.0418653	-0.000408983	-0.00302089	-0.0269783	0.0330372	-0.142613	-0.024594	-0.000111359	-0.00272565	-0.0147451	5.37112e-05	-9.6471e-06	-0.0222787	0.00268158	1.16751e-05	0.0130608	1.23982e-08	0.00302997	2.21478e-05	0.00181045	0.00143379	0.00041881	0.000259658
CTGAATGAGAGTGGCT.1	-0.00360839	-0.00124405	-0.0470334	-0.00235756	0.00428741	0.00291003	0.00107625	0.005596	-0.00024909	0.00116995	-0.00133554	-0.00360852	-0.00117616	0.000559466	-0.0036712	-0.0324108	0.00529607	1.45361e-05	0.000133023	0.00350445	-0.00313504	0.00577719	0.00207924	-0.00557931	0.004129	7.79536e-05	0.0301526	-0.00032456	-0.00109011	-0.00740116	0.00888654	-0.0238429	-0.00598972	-6.42699e-05	-0.00272201	-0.00479048	1.85706e-06	-4.99617e-05	-0.00648192	0.00256649	2.49818e-05	-0.00110339	8.14907e-09	0.00108015	-1.07295e-05	0.00184787	0.000517189	0.00118761	0.000265889
CTGAATGAGCAGCAGT.1	-0.0120154	-0.000326812	-0.070614	0.00127253	0.00934951	0.00292946	0.00111074	0.00776293	-0.000280885	0.00552812	-0.00138245	-0.00537922	-0.00117325	-0.00671671	-0.00589884	-0.0333846	0.00529309	1.50576e-05	0.00013403	-0.00287993	-0.00412059	0.00586532	0.00216331	-0.00545009	0.00405725	9.08561e-05	0.0882384	-0.000348603	-0.00162073	-0.0127986	0.0130087	-0.124683	-0.00919096	-7.92785e-05	-0.00272231	-0.0100027	5.88852e-06	-4.05516e-05	-0.00729913	0.00255885	1.62814e-05	0.000616383	8.41101e-09	0.00162294	-1.63447e-07	0.00185028	0.000471696	0.00112579	0.000265606
CTGAGCGCACGTAGTT.1	-0.0206261	0.00278041	-0.0403987	-0.00290096	0.0244151	0.00317237	0.00123728	0.00140662	-0.000297951	0.00189924	-0.00132562	-0.00429218	-0.000798778	-0.0168384	-0.00862468	-0.0181114	0.00488163	2.57865e-05	0.000135522	-0.00637866	-0.0080794	0.00592506	0.00244105	-0.0053241	0.00402857	1.42474e-05	0.0682157	-0.000386646	-0.0027205	-0.0257157	0.0318242	-0.127845	-0.018904	-0.000111365	-0.00272313	-0.0211433	1.54842e-05	-1.2082e-05	-0.0167381	0.0026725	1.20385e-05	0.00795598	1.33005e-08	0.00277371	1.89571e-05	0.00179436	0.00157128	0.000823013	0.000253983
CTGAGCGGTCAAAGTA.1	-0.00403419	-0.00130326	-0.0741092	-0.0014786	0.00367893	0.00299011	0.0010805	0.00329075	-0.00026348	0.00116557	-0.00129971	-0.0037863	-0.00117536	-0.00248905	-0.00377894	-0.0422618	0.0052956	1.76169e-05	0.000132924	0.00436509	-0.00315772	0.00579212	0.00212314	-0.00561583	0.00411738	9.05748e-05	0.0610509	-0.00032538	-0.00134017	-0.00974169	0.0103297	-0.0322544	-0.00731223	-6.71922e-05	-0.002722	-0.00456834	-4.71249e-07	-3.61614e-05	-0.00402167	0.00260881	2.3108e-05	-0.000637788	8.3819e-09	0.00133468	-4.43007e-06	0.00182835	0.000441164	0.00118743	0.000265952
CTGAGCGGTCGCAACC.1	-0.0106917	-0.000603714	-0.0826831	0.000327712	0.0113866	0.00292013	0.00111509	0.00761026	-0.000280321	0.0020857	-0.00138028	-0.00467705	-0.00116728	-0.00722915	-0.00498234	-0.0281477	0.00528682	1.45249e-05	0.000134116	-0.00271824	-0.00387395	0.00585474	0.00211666	-0.00549018	0.00406415	7.86968e-05	0.096622	-0.000349557	-0.00173272	-0.0135498	0.0127399	-0.112189	-0.00883651	-7.78509e-05	-0.00272198	-0.00884923	6.01774e-06	-3.58261e-05	-0.00931051	0.00256209	1.65589e-05	0.000387574	8.17818e-09	0.00173513	-7.63685e-08	0.00185049	0.000469625	0.0011261	0.000265591
CTGAGGCTCCGCACGA.1	-0.00332956	-0.00125878	-0.0420227	-0.000819802	-0.000791356	0.00290708	0.00107157	0.00506182	-0.000251874	0.00117334	-0.00132872	-0.00365701	-0.00117617	-0.000681248	-0.00367293	-0.0292225	0.00529659	1.49794e-05	0.000132969	0.00318447	-0.00309997	0.00576319	0.00208509	-0.00557493	0.0041347	0.000122283	0.026327	-0.000324411	-0.00111042	-0.00715878	0.00774945	0.00929746	-0.00709344	-6.47031e-05	-0.00271195	-0.00278106	-3.64147e-06	-5.00046e-05	0.000824064	0.00256346	2.75671e-05	-0.00103877	8.14907e-09	0.00110706	-1.10576e-05	0.00184345	0.000413299	0.00118762	0.000265962
CTGATCCCAGCCCAGT.1	-0.0192527	0.000834574	-0.0402904	-8.93995e-05	0.0145436	0.00292988	0.00113791	0.00803017	-0.000293653	0.0067471	-0.00142142	-0.00600113	-0.00117355	-0.00734987	-0.0112797	-0.0388819	0.00529285	1.73897e-05	0.000134412	-0.00340465	-0.00534124	0.00590374	0.00255744	-0.00541736	0.00403622	5.87944e-05	0.087288	-0.000384821	-0.00172631	-0.0154036	0.0165488	-0.179043	-0.00935379	-9.24538e-05	-0.00272304	-0.011069	5.9118e-06	-3.36766e-05	-0.0162228	0.0025716	1.25989e-05	0.00241292	8.73115e-09	0.00173856	2.46218e-08	0.00184987	0.000555456	0.000969737	0.0002653
CTGATCCTCGCGTTTC.1	-0.00351757	-0.00128935	-0.0468326	-0.00186722	0.00446855	0.00292408	0.00107936	0.00451675	-0.000248947	0.00117148	-0.00133414	-0.00362451	-0.00117615	0.000379136	-0.00367195	-0.0440462	0.00529652	1.44467e-05	0.000133026	0.00318043	-0.00310802	0.00576999	0.00210224	-0.00558169	0.00413553	7.66739e-05	0.0263607	-0.000324627	-0.00109041	-0.00711063	0.00885525	-0.00993264	-0.00663182	-6.45873e-05	-0.002722	-0.00366227	-3.38443e-06	-5.01424e-05	-0.00563145	0.00256854	2.49855e-05	-0.00109345	8.14907e-09	0.00108064	-8.85758e-06	0.00185389	0.000442967	0.0011876	0.000265963
CTGCAGGTCTAGCCAA.1	-0.0103814	-0.000377532	-0.0902932	0.000607454	0.0103508	0.00292811	0.00111466	0.00561083	-0.000281841	0.00249787	-0.00133463	-0.00453434	-0.00117287	-0.00685385	-0.00589314	-0.0313011	0.00528949	1.46478e-05	0.000134388	-0.000657486	-0.00409402	0.00584767	0.00222597	-0.00546519	0.0040703	8.90698e-05	0.089516	-0.000347545	-0.00160047	-0.0127516	0.0127238	-0.101091	-0.00825716	-7.58122e-05	-0.00272237	-0.00849041	6.43544e-06	-3.96892e-05	-0.0101715	0.00256143	1.6965e-05	0.000358932	8.17818e-09	0.00160075	-9.11765e-07	0.00185109	0.000446126	0.0011174	0.000264673
CTGCATCCACCAGTAT.1	-0.00335312	-0.00125176	-0.0336607	-0.00103302	0.000933983	0.00290668	0.00107253	0.00555681	-0.00024872	0.00117313	-0.00133267	-0.00362233	-0.00117617	-6.34156e-05	-0.00367239	-0.0218012	0.00529669	1.44914e-05	0.000133062	0.00315386	-0.00310489	0.0057694	0.00209263	-0.00557765	0.0041359	0.000104321	0.0161563	-0.000324329	-0.00104932	-0.00672295	0.00743679	0.00718388	-0.00662326	-6.40475e-05	-0.00272216	-0.00335199	-3.73088e-06	-4.99971e-05	-0.00163716	0.00256455	2.73846e-05	-0.00108475	8.14907e-09	0.00104402	-1.26481e-05	0.00184965	0.000437796	0.00118778	0.000265963
CTGCCATAGGCATCAG.1	-0.00385664	-0.00133729	-0.0596139	-0.00299282	0.00148942	0.00301342	0.00106908	0.00473647	-0.000259092	0.0011702	-0.00129753	-0.00370268	-0.00117583	0.000432309	-0.00374117	-0.060153	0.0052962	1.46776e-05	0.000133226	0.0040692	-0.00317738	0.00578972	0.00213849	-0.00557476	0.00411796	9.29628e-05	0.0329558	-0.000324493	-0.00124898	-0.00825713	0.00871324	-0.0107604	-0.00713078	-6.51801e-05	-0.00272137	-0.00431031	1.37463e-06	-4.58695e-05	-0.00287673	0.00256975	2.4721e-05	-0.00102403	8.14907e-09	0.00124643	-6.75279e-06	0.00185417	0.000438288	0.00118685	0.000265962
CTGCCTAAGCATGGGT.1	-0.00395727	-0.001411	-0.0502515	-0.00815203	0.00801789	0.00305338	0.00110118	0.00434601	-0.000251178	0.00116675	-0.00130058	-0.00361139	-0.00117609	0.00540261	-0.00368371	-0.0587138	0.00529651	1.45286e-05	0.000132982	0.00517443	-0.0031774	0.00579553	0.00213124	-0.00559934	0.00411225	4.81047e-05	0.0382734	-0.000324925	-0.00118473	-0.00831464	0.0122107	-0.0412754	-0.00602886	-6.49473e-05	-0.002722	-0.00425184	7.24569e-07	-4.90881e-05	-0.0138896	0.00258615	2.15601e-05	-0.00112944	8.09086e-09	0.00117023	-7.20494e-06	0.0018516	0.000535831	0.00118752	0.000265833
CTGCCTACATGCACTA.1	-0.0214578	0.000926681	-0.0316048	-0.00392342	0.0246776	0.00304327	0.00121325	0.00150075	-0.000298201	0.0022637	-0.0014676	-0.00448579	-0.000978605	-0.0121077	-0.0110401	-0.0216255	0.00508424	2.32533e-05	0.000136107	-0.00185618	-0.0059485	0.00599513	0.00251202	-0.00534233	0.00402842	2.57883e-05	0.0534765	-0.000391787	-0.00232566	-0.0222998	0.025133	-0.117549	-0.0137307	-0.000104833	-0.00273683	-0.0123256	5.85057e-06	-1.62479e-05	-0.00928703	0.00263439	1.2076e-05	0.00949725	1.35333e-08	0.0022759	5.97909e-06	0.00175726	0.00113547	0.000748969	0.000262454
CTGCCTAGTCCTGTCT.1	-0.0195665	0.00073988	-0.0322302	-0.00330948	0.0244742	0.00300381	0.00117648	0.00280455	-0.000298136	0.00223743	-0.00145264	-0.00478363	-0.00106996	-0.0106529	-0.00987556	-0.0241068	0.00517843	2.43001e-05	0.000135422	-0.00327547	-0.00558088	0.0059699	0.00243808	-0.00536579	0.00403004	3.23672e-05	0.0619245	-0.000386512	-0.00216126	-0.0206037	0.0229532	-0.133581	-0.0118006	-0.000101594	-0.00273748	-0.0105583	3.80166e-06	-2.06865e-05	-0.0103746	0.00260099	1.22394e-05	0.00792291	1.28348e-08	0.00211507	3.04775e-06	0.00175744	0.000889226	0.000806763	0.000263149
CTGCTCAGTTGAGAGC.1	-0.0131497	7.07782e-05	-0.0940728	-0.000873796	0.00748682	0.00302213	0.00115248	0.00219842	-0.000292317	0.00309912	-0.00142506	-0.00482594	-0.00115474	-0.00743549	-0.00783124	-0.0643011	0.0052663	1.46441e-05	0.000134634	0.00625133	-0.00473125	0.00587039	0.00224812	-0.00552654	0.00405509	5.72056e-05	0.0687286	-0.000364443	-0.00193963	-0.0150908	0.0161313	-0.114196	-0.0118253	-8.16428e-05	-0.00273619	-0.00607425	-4.61936e-07	-1.752e-05	-0.0125848	0.00257066	1.47112e-05	0.000724606	8.61473e-09	0.00193985	-1.04774e-07	0.00184898	0.000489697	0.0011306	0.000263169
CTGGCAGTCCACCTCA.1	-0.016845	-9.99509e-05	-0.06022	0.00107994	0.00977361	0.00296773	0.00113116	0.00689574	-0.000290888	0.00521924	-0.00138135	-0.00547443	-0.00117271	-0.00835795	-0.0113698	-0.0437907	0.0052902	1.60746e-05	0.000134362	-0.0003955	-0.00444744	0.00589268	0.00265564	-0.00542067	0.00404027	6.2814e-05	0.0832516	-0.000377273	-0.00171204	-0.0147195	0.015918	-0.169265	-0.00925127	-8.73056e-05	-0.00272276	-0.00941509	5.81937e-06	-3.3902e-05	-0.0131351	0.00257167	1.28765e-05	0.00221539	8.44011e-09	0.00171995	-2.28174e-08	0.00184996	0.00050652	0.00102904	0.000264622
CTGGTCTTCTGATGGT.1	-0.0035394	-0.00131882	-0.051211	-0.000934304	-0.000101591	0.00296614	0.00106552	0.00500382	-0.000255111	0.00117294	-0.00131826	-0.00368195	-0.00117607	-0.000679746	-0.00369825	-0.045762	0.00529661	1.45733e-05	0.000133093	0.00342516	-0.00312197	0.00577701	0.00211348	-0.00557324	0.00412883	0.000113668	0.0226247	-0.000324374	-0.00115441	-0.00729418	0.00791638	-0.00243694	-0.00731529	-6.44993e-05	-0.0027206	-0.00336719	-1.05612e-06	-4.93135e-05	-0.000300974	0.00256394	2.64011e-05	-0.0010722	8.14907e-09	0.00115106	-9.01241e-06	0.00185288	0.00041382	0.00118735	0.000265963
CTGTACCAGTAAACGT.1	-0.00426718	-0.00140006	-0.0460203	-0.0081571	0.00969052	0.00305464	0.00111107	0.00413893	-0.000251245	0.00116466	-0.00129983	-0.00361389	-0.00117607	0.00504555	-0.0036867	-0.0632301	0.0052963	1.45063e-05	0.000132978	0.00553322	-0.00320679	0.00579937	0.00215478	-0.00560816	0.00410878	4.14085e-05	0.0438766	-0.000325037	-0.00121874	-0.00866676	0.0129429	-0.0485145	-0.00569159	-6.51279e-05	-0.002722	-0.00469643	8.56817e-08	-4.8494e-05	-0.0160286	0.00259541	2.04463e-05	-0.0011395	8.09086e-09	0.00120306	-6.28107e-06	0.00185112	0.000560284	0.00118752	0.000265846
CTGTAGAGTTCCGCGA.1	-0.00344682	-0.0012469	-0.0370529	-0.000814526	0.00325685	0.00291304	0.00107399	0.00540466	-0.000248658	0.00117157	-0.00133513	-0.00363554	-0.00117617	-0.000581171	-0.00366917	-0.0263677	0.00529662	1.44653e-05	0.000133025	0.00301326	-0.0031246	0.00576963	0.00208563	-0.00557953	0.00413555	9.54587e-05	0.0249547	-0.000324322	-0.00107076	-0.00703288	0.00806362	-0.00201187	-0.00642594	-6.40444e-05	-0.00272201	-0.00408399	-3.50736e-06	-4.98854e-05	-0.0043371	0.0025664	2.63117e-05	-0.00109471	8.14907e-09	0.0010635	-1.18024e-05	0.00184901	0.000475287	0.00118761	0.000265956
CTGTCGTTCCCTCAAC.1	-0.00346899	-0.00129292	-0.0422046	-0.00308814	0.0051798	0.00293812	0.00109039	0.00623574	-0.000248772	0.00117016	-0.0013255	-0.00356358	-0.00116927	0.000945825	-0.00367989	-0.0466113	0.00528898	1.4469e-05	0.000133008	0.00332851	-0.00314532	0.00578126	0.0020986	-0.00560221	0.00412639	7.36546e-05	0.0340585	-0.000324657	-0.00111848	-0.00768474	0.00954632	-0.0246941	-0.0059657	-6.44849e-05	-0.002722	-0.00417706	5.04963e-06	-4.69331e-05	-0.00825369	0.00258916	2.41213e-05	-0.00111146	8.14907e-09	0.00110735	-1.03347e-05	0.00184602	0.000509396	0.00118762	0.000265796
CTGTGAACATTACGGT.1	-0.00393273	-0.00128617	-0.0518753	-0.00622057	0.00776756	0.00291195	0.00109511	0.0024427	-0.000254445	0.00116666	-0.00133849	-0.00363786	-0.00117592	0.00314675	-0.00368897	-0.078318	0.00529557	1.48416e-05	0.000132961	0.00578522	-0.00315704	0.00578262	0.00208267	-0.00565431	0.00412433	5.49406e-05	0.0429368	-0.000324568	-0.0012609	-0.00868782	0.0119072	-0.0410575	-0.0069087	-6.49518e-05	-0.00272201	-0.00425398	-2.27615e-06	-4.35561e-05	-0.0120085	0.00264148	2.24486e-05	-0.0010876	7.91624e-09	0.00124538	-2.92133e-06	0.00185192	0.000466913	0.00118747	0.000265963
CTTACCGGTCAGCTTA.1	-0.00403279	-0.00121526	-0.0855883	0.000363667	0.00262327	0.00291059	0.00107953	0.00481371	-0.000261356	0.00120873	-0.00132963	-0.00386368	-0.00117094	-0.00290284	-0.00382949	-0.0551878	0.00529087	1.46627e-05	0.000133302	0.00288448	-0.00318148	0.00579218	0.00222581	-0.00556324	0.00411706	0.00010889	0.042723	-0.000327332	-0.0012474	-0.00838883	0.00895505	-0.0298337	-0.00722085	-6.60452e-05	-0.00272173	-0.00393328	-2.83495e-06	-4.86057e-05	-0.00305423	0.00257014	2.51383e-05	-0.000882104	8.14907e-09	0.00124645	-7.72276e-06	0.00185066	0.000424579	0.00118159	0.000265732
CTTACCGGTTCTTAGG.1	-0.00500333	-0.00136007	-0.103437	-0.00312841	0.00782039	0.0030252	0.00106525	0.00188342	-0.000275642	0.0011623	-0.00122129	-0.0040272	-0.00117553	-0.00358343	-0.00380294	-0.0396569	0.00529554	1.72146e-05	0.000133358	0.00373457	-0.00318328	0.00582368	0.00211063	-0.00558722	0.00408674	6.96182e-05	0.077911	-0.000325119	-0.00162805	-0.0127594	0.0131426	-0.03307	-0.00652465	-6.76565e-05	-0.00272107	-0.00795847	3.59491e-07	-3.35835e-05	-0.00508603	0.0025921	2.12174e-05	-0.000641271	8.3819e-09	0.00162598	-4.93601e-07	0.00184013	0.000478908	0.00118491	0.000265924
CTTACCGTCGCATTGA.1	-0.00957467	-3.65195e-05	-0.0881614	0.000915042	0.0098518	0.00292386	0.00111486	0.00646443	-0.000277677	0.00251981	-0.00134497	-0.00462171	-0.00117333	-0.00667288	-0.00521601	-0.0259661	0.0052906	1.48639e-05	0.000134127	-0.00132928	-0.0043983	0.00584599	0.00220591	-0.00548975	0.00407425	9.56133e-05	0.088426	-0.000345899	-0.00154993	-0.0123515	0.011354	-0.0905932	-0.00818536	-7.53878e-05	-0.00272358	-0.00858882	0.000151386	-4.40702e-05	-0.00839451	0.00256221	1.79335e-05	8.01906e-05	8.14907e-09	0.00155007	-1.01444e-06	0.00183994	0.000458553	0.00112371	0.000264993
CTTACCGTCTCACGAA.1	-0.0122005	-0.000577527	-0.090814	0.00086609	0.00873559	0.00297383	0.00112211	0.00293861	-0.000289727	0.00246032	-0.00132836	-0.00480432	-0.00115545	-0.00712407	-0.00751458	-0.0538507	0.00527218	1.44653e-05	0.000134999	0.00364342	-0.00396173	0.00584938	0.00260218	-0.00545616	0.00406611	8.11983e-05	0.0857473	-0.000352552	-0.00164449	-0.0130332	0.0148183	-0.111424	-0.00910142	-7.69156e-05	-0.00272298	-0.00830373	1.86265e-07	-3.33898e-05	-0.0128066	0.00256038	1.54953e-05	0.00055035	8.17818e-09	0.00164444	-1.31084e-06	0.00185131	0.000454605	0.00112179	0.000264481
CTTAGGACAAGATCCT.1	-0.00375962	-0.0012502	-0.0868551	-0.00169255	0.00325774	0.00295771	0.00106124	0.00387426	-0.000263714	0.00116888	-0.00128127	-0.00384667	-0.00117592	-0.0018175	-0.00371423	-0.0594535	0.00529603	1.52253e-05	0.00013317	0.00319593	-0.00316623	0.00579022	0.00212036	-0.00559509	0.0041107	9.84203e-05	0.0492875	-0.000325276	-0.00134108	-0.00936795	0.00971724	-0.0141053	-0.00683293	-6.61651e-05	-0.0027117	-0.00412875	-3.0715e-06	-4.01102e-05	-0.0023112	0.00259122	2.45422e-05	-0.000945069	8.14907e-09	0.00133649	-4.00725e-06	0.00183094	0.000423998	0.00118643	0.000265958
CTTCCTTCAATTCTTC.1	-0.00960463	-0.000425364	-0.0956513	0.000554299	0.0112937	0.00291824	0.00111275	0.00683803	-0.000279014	0.00188886	-0.00133378	-0.00439382	-0.00117312	-0.00675329	-0.00511554	-0.026298	0.00528767	1.47447e-05	0.000134163	-0.00199028	-0.00404181	0.00584687	0.00223622	-0.00547156	0.00407364	8.38637e-05	0.0874955	-0.00034464	-0.00160016	-0.0125617	0.0119389	-0.0958965	-0.00806832	-7.52888e-05	-0.0027224	-0.00811681	6.53509e-06	-4.1334e-05	-0.0103373	0.00256424	1.77007e-05	0.000514671	8.17818e-09	0.00160027	-8.75676e-07	0.00184469	0.00044474	0.00112535	0.000264
CTTCCTTGTGCGGTAA.1	-0.00388923	-0.00127385	-0.0578379	-0.00525703	0.00454214	0.00290551	0.00108656	0.00277111	-0.000253975	0.0011673	-0.00133804	-0.00366208	-0.00117609	0.00241063	-0.00368273	-0.066061	0.00529581	1.45994e-05	0.000132995	0.00538908	-0.00313822	0.00577986	0.00209185	-0.00563268	0.00412672	6.14915e-05	0.0448707	-0.000324508	-0.00121997	-0.00849267	0.0111911	-0.0338261	-0.00660974	-6.47602e-05	-0.00272203	-0.00396043	-7.86036e-07	-4.43347e-05	-0.00802326	0.00261983	2.32235e-05	-0.00106769	8.09086e-09	0.00120578	-3.59188e-06	0.0018485	0.000449151	0.00118758	0.000265963
CTTCGGTAGGATATAC.1	-0.00985398	-0.000354708	-0.0827636	0.000763416	0.0092363	0.0029248	0.00111286	0.00701698	-0.000277531	0.00269169	-0.0013585	-0.00465833	-0.0011732	-0.00652376	-0.00517025	-0.0274882	0.00529143	1.47671e-05	0.000134094	-0.00178136	-0.0040897	0.00584845	0.00215489	-0.00548635	0.00407109	9.47285e-05	0.0884096	-0.000346525	-0.00157413	-0.0123919	0.0116738	-0.0982494	-0.00847434	-7.60498e-05	-0.00272264	-0.0088841	3.09795e-05	-4.16245e-05	-0.00741369	0.00256142	1.75834e-05	6.30729e-05	8.17818e-09	0.00157463	-6.38887e-07	0.00184996	0.00046058	0.00112628	0.000265248
CTTCGGTGTCACTGAT.1	-0.00348881	-0.00125898	-0.0359092	-0.00128815	0.00395746	0.00291267	0.0010782	0.00546637	-0.000248192	0.00117059	-0.0013346	-0.00360457	-0.00117584	-0.000259619	-0.00367008	-0.0326282	0.00529599	1.44504e-05	0.000133032	0.00379833	-0.00312015	0.00577302	0.00208353	-0.00558114	0.00413299	8.40072e-05	0.0271414	-0.000324449	-0.00107679	-0.0071486	0.00843596	-0.0125232	-0.00620276	-6.42153e-05	-0.00272201	-0.0042949	-1.99862e-06	-4.85722e-05	-0.00607631	0.00256804	2.53692e-05	-0.00109788	8.11997e-09	0.00106768	-1.15416e-05	0.00184598	0.000484049	0.00118761	0.000265911
CTTCTCTGTCTTGCTC.1	-0.0134563	0.000111004	-0.0867071	0.000107414	0.0163105	0.00294636	0.00112419	0.00644027	-0.000292104	0.00195626	-0.00144237	-0.00465552	-0.00116216	-0.00920284	-0.00734003	-0.0271222	0.00528209	1.53668e-05	0.000134382	-0.00197433	-0.00470687	0.00588054	0.0022913	-0.00547516	0.00404642	4.80134e-05	0.0953291	-0.000359824	-0.00192309	-0.0157152	0.0160147	-0.157512	-0.0109876	-8.45133e-05	-0.00272201	-0.0101302	5.72484e-06	-3.05586e-05	-0.018233	0.00258738	1.34874e-05	0.00264613	8.41101e-09	0.00192473	1.25729e-08	0.00184251	0.000617772	0.00103234	0.000265447
CTTCTCTGTGCAGATG.1	-0.00416033	-0.0012921	-0.0471249	-0.00897131	0.00851383	0.00292032	0.00111819	0.00256754	-0.000254683	0.00116625	-0.00134264	-0.00357624	-0.00117554	0.00611507	-0.00370178	-0.0912758	0.00529533	1.48676e-05	0.000132974	0.00687021	-0.00320344	0.00578619	0.00210012	-0.00563429	0.00412026	4.88348e-05	0.0345328	-0.000324471	-0.00125717	-0.00838519	0.0121966	-0.0498269	-0.00697783	-6.49048e-05	-0.002722	-0.00453618	-2.25566e-06	-4.44315e-05	-0.0144599	0.00262115	2.18358e-05	-0.00110865	7.10133e-09	0.00124101	-4.00702e-06	0.00185514	0.00049001	0.00118743	0.000265963
CTTGAGAAGGAAGTGA.1	-0.00375502	-0.00127144	-0.0510335	-0.00284479	0.00570212	0.00291004	0.00108588	0.00259426	-0.000253287	0.00116825	-0.00133416	-0.00368096	-0.00117607	6.79307e-05	-0.00368206	-0.0572835	0.00529557	1.48304e-05	0.00013295	0.00385859	-0.00313696	0.00577803	0.00207973	-0.00561795	0.00412712	6.80257e-05	0.0486155	-0.000324456	-0.00120828	-0.00844627	0.0113462	-0.032524	-0.00653191	-6.43017e-05	-0.002722	-0.00381351	-2.63005e-06	-4.56814e-05	-0.00782946	0.00260548	2.37636e-05	-0.0010362	8.14907e-09	0.00119496	-3.08151e-06	0.00184587	0.00043872	0.00118753	0.000265963
CTTGAGAAGGCAATGC.1	-0.0160545	0.000485653	-0.0820771	-0.000187988	0.0246555	0.0030464	0.00120185	0.00135477	-0.000297308	0.0015569	-0.00124682	-0.0043093	-0.0011003	-0.0155284	-0.00540606	-0.0350365	0.00519167	2.00942e-05	0.000134235	-0.0045713	-0.00540902	0.00590135	0.00220986	-0.0054291	0.00403299	3.65619e-05	0.10053	-0.000370255	-0.0023344	-0.0219032	0.0256409	-0.150044	-0.0137796	-9.27745e-05	-0.00272189	-0.0182385	4.22634e-06	-2.08337e-05	-0.021381	0.00259486	1.33459e-05	0.0038089	1.01281e-08	0.0023557	4.48059e-06	0.00182471	0.00111237	0.000971131	0.000256795
CTTGATTAGCCAAGGT.1	-0.0035169	-0.00128016	-0.0539071	-6.56079e-05	-7.99466e-05	0.00293564	0.00106951	0.00516523	-0.000254478	0.00117537	-0.00132066	-0.00368369	-0.00117604	-0.00145837	-0.00370026	-0.0377016	0.00529661	1.45808e-05	0.000133177	0.00286629	-0.00312066	0.00577598	0.00208704	-0.00556959	0.00413077	0.000121264	0.0237713	-0.000324486	-0.00114668	-0.0072097	0.00766428	0.00446808	-0.00723528	-6.46729e-05	-0.00272174	-0.00329307	-1.56462e-06	-5.01648e-05	0.000442743	0.00255898	2.68593e-05	-0.00104342	8.14907e-09	0.00114457	-9.3421e-06	0.00185335	0.000412822	0.00118726	0.000265963
CTTGATTCACAGAGCA.1	-0.0141444	-0.00298784	-0.0240521	-0.0339135	-0.00179847	0.00476955	0.00158343	0.00542742	-0.000293888	0.000999555	-0.00126101	-0.00305455	-0.00117492	0.0158869	-0.0042863	-0.101959	0.00527954	2.19159e-05	0.000133006	0.0604299	-0.00420498	0.00588885	0.0035144	-0.00617135	0.00403031	-0.000139607	-0.000962697	-0.000338277	-0.00316963	-0.0225159	0.0410105	-0.162751	-0.00929971	-8.21512e-05	-0.00272271	-0.030814	2.04062e-05	-9.91858e-06	-0.063275	0.00318965	7.72439e-06	-0.00193879	-1.49943e-07	0.00308648	1.61817e-06	0.00187733	0.00343186	0.00118995	0.000265647
CTTGATTGTTCTTAGG.1	-0.00507262	-0.00132382	-0.083206	-0.0160521	0.013028	0.00295023	0.0010832	0.00305485	-0.000268468	0.0011557	-0.00133465	-0.00376717	-0.00117576	0.0100263	-0.00379976	-0.0764182	0.00529463	1.50725e-05	0.000133077	0.00588593	-0.00321375	0.00581195	0.00216354	-0.00572571	0.00409855	2.64607e-05	0.0764408	-0.000325551	-0.00162253	-0.0117662	0.014766	-0.0874636	-0.00684042	-6.71056e-05	-0.002722	-0.00530857	3.37511e-06	-3.61782e-05	-0.0184268	0.0027158	1.86823e-05	-0.000563733	8.14907e-09	0.00160545	-3.6764e-07	0.00184835	0.00050953	0.00118722	0.000265962
CTTTCAAAGGTGATCG.1	-0.0121727	0.000331293	-0.0987649	-0.000567047	0.0131507	0.00298007	0.00118363	0.00228529	-0.000291543	0.00198527	-0.00144756	-0.0045405	-0.0011487	-0.0100402	-0.00591309	-0.0571699	0.00526677	1.61082e-05	0.000134071	0.00377095	-0.00503915	0.00587028	0.00216359	-0.00553067	0.00405152	5.701e-05	0.0854176	-0.000368452	-0.0020515	-0.0170742	0.0164291	-0.119861	-0.0113839	-8.13901e-05	-0.00272857	-0.00702545	7.93487e-07	-2.11932e-05	-0.0151303	0.00258233	1.51377e-05	0.00137372	9.34233e-09	0.00205488	1.18744e-08	0.0018471	0.000525169	0.0010224	0.000265082
CTTTCAACACTGTCGG.1	-0.0154883	0.00130366	-0.0781732	-0.000486258	0.0197174	0.00298218	0.00115082	0.00392547	-0.00029626	0.0017129	-0.0014583	-0.00447747	-0.00112368	-0.0118693	-0.0067749	-0.0261963	0.00523601	2.07834e-05	0.000134334	-0.00154628	-0.00605763	0.00589393	0.00232092	-0.00546557	0.00403637	3.89367e-05	0.0975102	-0.000359466	-0.00202982	-0.0187656	0.0201669	-0.147265	-0.0126808	-8.72471e-05	-0.00272231	-0.0150376	4.95743e-06	-2.51904e-05	-0.0192886	0.00259916	1.31344e-05	0.00396451	1.02445e-08	0.00203659	5.09433e-07	0.00181837	0.000993371	0.00099682	0.000263182
CTTTCGGTCGACATTG.1	-0.00353362	-0.00129648	-0.0404453	-0.00132362	0.00121844	0.00291992	0.00107343	0.00527564	-0.000255978	0.00117251	-0.00132566	-0.00374482	-0.00117603	-0.000369007	-0.00371685	-0.0457641	0.00529671	1.44392e-05	0.000133265	0.00261364	-0.00310134	0.00577809	0.00207733	-0.00556497	0.00412851	0.000116751	0.0241001	-0.000324314	-0.00122397	-0.00744713	0.00775826	0.00740007	-0.00763733	-6.42387e-05	-0.0027221	-0.00347355	-1.00769e-06	-5.01517e-05	-0.00147441	0.00255531	2.62484e-05	-0.00107418	8.14907e-09	0.00122538	-1.03088e-05	0.00186384	0.000414625	0.0011875	0.000265941
GAAACCTCATTCCTCG.1	-0.00595978	-0.000943706	-0.0959089	0.000652552	0.00578389	0.00290749	0.0010957	0.00574987	-0.000271793	0.00124812	-0.00133629	-0.00403041	-0.00115862	-0.00505206	-0.0041837	-0.0335596	0.00527706	1.47112e-05	0.000133473	0.00112785	-0.00346138	0.00580503	0.00211216	-0.00553829	0.00410634	0.000106374	0.0771553	-0.000338292	-0.00143258	-0.0104053	0.00955572	-0.0480223	-0.00780933	-6.91676e-05	-0.00272224	-0.00711334	3.14787e-06	-4.2988e-05	-0.00523156	0.00256386	2.29888e-05	-0.000779837	8.14907e-09	0.00143376	-4.14555e-06	0.00185486	0.000440061	0.00116605	0.000265187
GAAACCTTCTGTAAGC.1	-0.00726733	-0.00165629	-0.0756519	-0.00435228	0.0111068	0.00324624	0.00110147	0.00168933	-0.000296016	0.00113267	-0.000836427	-0.00392159	-0.00116236	-0.00731651	-0.00414347	-0.0266947	0.00526866	3.48361e-05	0.000132332	0.00186888	-0.0033515	0.0058843	0.00378156	-0.00550294	0.00405158	3.82904e-05	0.0758844	-0.000327712	-0.00218314	-0.0176623	0.0207576	-0.0744646	-0.0118759	-7.92243e-05	-0.00272297	-0.0132846	4.87268e-06	-3.20133e-05	-0.00801614	0.00261487	1.37668e-05	0.00173945	1.67638e-08	0.00216444	4.65661e-09	0.00183432	0.000570893	0.00117195	0.000260772
GAAATGAGTGTCATCA.1	-0.00644309	-0.00136267	-0.0774387	-0.0211495	0.0254138	0.00296599	0.00111483	0.00184202	-0.000267113	0.00114973	-0.00135425	-0.00362114	-0.00117337	0.0141534	-0.00374219	-0.0911967	0.00529107	1.51917e-05	0.000132889	0.0121256	-0.00326332	0.00582192	0.00214907	-0.00569285	0.00408428	1.6083e-05	0.0528269	-0.000325417	-0.00176091	-0.0125663	0.0177463	-0.0868356	-0.00735528	-6.5978e-05	-0.002722	-0.00786892	1.7751e-06	-3.72492e-05	-0.0369663	0.0026808	1.67992e-05	-0.00127359	7.45058e-09	0.00174481	-1.10827e-07	0.00185154	0.000653416	0.00118709	0.000265962
GAACACTCAAGGACAC.1	-0.0178221	0.00140906	-0.0532304	-0.0036957	0.0266892	0.00331978	0.0012483	-0.000654016	-0.000297509	0.00153103	-0.00138526	-0.00399552	-0.00100268	-0.0153598	-0.00608953	-0.0147067	0.00506887	2.89176e-05	0.000134809	-0.0059233	-0.00682967	0.00592605	0.00236868	-0.00540586	0.00403166	1.13733e-05	0.0833276	-0.000367066	-0.00254183	-0.0247651	0.0329366	-0.106689	-0.0159888	-0.000105005	-0.00272851	-0.0273903	1.39717e-05	-1.79354e-05	-0.0250765	0.00267188	1.20632e-05	0.00549544	1.28057e-08	0.00253427	1.09999e-05	0.00180979	0.00198828	0.0010274	0.000249604
GAACACTGTGGATGAC.1	-0.00718475	-0.00152829	-0.0930075	-0.00713523	0.0159037	0.00315715	0.00109344	-0.000906805	-0.000291435	0.00112915	-0.00123603	-0.00398577	-0.00115536	-0.0045639	-0.00393251	-0.039761	0.00527136	2.61981e-05	0.000133058	0.00595306	-0.0033342	0.00586662	0.00233571	-0.00561747	0.00404834	2.37729e-05	0.0817412	-0.000330342	-0.00214054	-0.0176816	0.0244508	-0.09575	-0.00924754	-7.53453e-05	-0.00271579	-0.0120653	6.68131e-06	-2.37077e-05	-0.0229669	0.00264014	1.4469e-05	0.000827383	9.54606e-09	0.00213343	1.39931e-07	0.0018452	0.000690594	0.00117899	0.000265099
GAACACTTCGCGAAGA.1	-0.00392989	-0.00124559	-0.0828966	-0.000592853	0.00240318	0.00297523	0.0010818	0.00395269	-0.000263623	0.00116891	-0.00127706	-0.00382854	-0.00117544	-0.00287932	-0.00376444	-0.0449629	0.00529599	1.8578e-05	0.000132969	0.00351214	-0.00319371	0.00579541	0.00214115	-0.00558995	0.00411515	0.000103593	0.0540263	-0.000325425	-0.00131023	-0.00929426	0.00937384	-0.0185336	-0.00718189	-6.73073e-05	-0.00272157	-0.00452411	-1.46963e-06	-3.64799e-05	-0.00199336	0.00258636	2.45422e-05	-0.000641421	8.3819e-09	0.00130859	-5.37047e-06	0.00182613	0.000436559	0.00118707	0.000265945
GAAGAATGTAGTCTTG.1	-0.00394602	-0.00127671	-0.0593631	-0.00647561	0.00721588	0.00290535	0.00108445	0.00235734	-0.000255923	0.00116626	-0.00133472	-0.00372218	-0.00117607	0.00318496	-0.00367987	-0.0714903	0.00529547	1.54674e-05	0.000132915	0.0046506	-0.00314097	0.00578427	0.00208125	-0.00563461	0.0041225	5.71962e-05	0.0546114	-0.000324702	-0.00130255	-0.00899768	0.0119001	-0.0395131	-0.00679394	-6.4966e-05	-0.00272203	-0.00400725	-9.51812e-07	-4.25912e-05	-0.0101604	0.00262223	2.29292e-05	-0.00102326	8.11997e-09	0.00128749	-2.01049e-06	0.00184888	0.000444174	0.00118747	0.000265963
GAAGGACGTTAAGAAC.1	-0.00494273	-0.00115787	-0.0900332	0.00111658	0.00440986	0.002907	0.00108846	0.0052591	-0.000267	0.00130968	-0.00133592	-0.00405155	-0.00114637	-0.00448533	-0.00408707	-0.0333375	0.0052664	1.45547e-05	0.000133241	0.00186064	-0.00322886	0.00579423	0.00210706	-0.00556193	0.00411619	0.000120802	0.0668095	-0.000338672	-0.00134893	-0.00939948	0.0089524	-0.0392652	-0.00802936	-6.91232e-05	-0.00272352	-0.00537094	1.20699e-06	-4.52846e-05	-0.0040924	0.00256069	2.48142e-05	-0.000942558	8.14907e-09	0.0013511	-5.63264e-06	0.00185594	0.000427365	0.00117795	0.00026571
GAAGGGTCAACGGGTA.1	-0.00429884	-0.0012746	-0.0714626	-0.00527311	0.00631704	0.00291768	0.00108165	0.00212285	-0.000260082	0.0011646	-0.00133406	-0.00374698	-0.00117575	0.00131711	-0.00370065	-0.0617286	0.00529539	1.48155e-05	0.000132933	0.00559752	-0.00315245	0.00578945	0.00210378	-0.00563957	0.00411858	6.07222e-05	0.0651125	-0.000324873	-0.00137338	-0.00968409	0.0123588	-0.0444014	-0.006809	-6.59302e-05	-0.0027221	-0.00470108	1.98185e-06	-3.96185e-05	-0.00988299	0.00262791	2.2497e-05	-0.000991527	8.14907e-09	0.00135791	-1.70874e-06	0.00184148	0.000452697	0.00118762	0.00026596
GAAGGGTCAACTTGGT.1	-0.00332975	-0.00126171	-0.0277524	-0.000930401	-0.000797326	0.00290388	0.00107192	0.00569231	-0.000248186	0.00117419	-0.00133037	-0.00359825	-0.00117615	9.79323e-05	-0.00366527	-0.0223337	0.00529676	1.44579e-05	0.000133071	0.00280942	-0.00309138	0.00576452	0.00208051	-0.00557266	0.00413911	0.000127353	0.00738751	-0.000324329	-0.00103108	-0.00643814	0.00701946	0.0176074	-0.00695892	-6.39848e-05	-0.00272042	-0.00287539	-3.94508e-06	-5.11166e-05	0.00108254	0.00255972	2.83457e-05	-0.00108316	8.14907e-09	0.00103014	-1.35051e-05	0.00185166	0.000413299	0.00118858	0.000265963
GAATAGAAGAGCAGAA.1	-0.0445725	0.0073974	0.0167187	-0.003983	0.0191276	0.00400974	0.00142337	0.0098006	-0.000607491	0.00477803	-0.000785814	-0.00463096	-0.000743828	-0.0294981	-0.0198642	0.0120012	0.00469011	3.50047e-05	0.000137908	-0.0130913	-0.0148292	0.00659368	0.00321944	-0.00481232	0.00358197	-1.98409e-05	0.0060492	-0.000476947	-0.00475833	-0.0383041	0.0582261	0.141412	-0.0331381	-0.000161397	-0.002722	-0.0437461	0.0262903	3.64259e-05	-0.0178744	0.0027241	-7.00355e-06	0.0142093	1.02038e-07	0.00482731	0.000246634	0.00171913	0.00306775	0.000382882	0.00021283
GAATAGATCAATCCGA.1	-0.00336995	-0.00126531	-0.0347319	0.000107242	-0.000988448	0.00290374	0.00107872	0.00574431	-0.000248285	0.00118077	-0.00133202	-0.00362913	-0.00117573	-0.000829253	-0.00367566	-0.0213268	0.0052964	1.4469e-05	0.000133097	0.00261702	-0.0031051	0.00576688	0.00207962	-0.00556163	0.00413834	0.000128839	0.00406318	-0.000324404	-0.00102308	-0.00635677	0.00700975	0.0172871	-0.00710244	-6.39283e-05	-0.002722	-0.00278707	-3.2261e-06	-5.14947e-05	0.00158882	0.00255528	2.86847e-05	-0.00108061	8.14907e-09	0.00102505	-1.42574e-05	0.00185736	0.000411853	0.00118748	0.000265962
GAATCACAGCGCATCC.1	-0.0038737	-0.00129111	-0.0713323	-0.00489249	0.00361266	0.00291689	0.00108318	0.00378364	-0.000259033	0.00116714	-0.00133811	-0.00366445	-0.00117577	0.00165333	-0.00369245	-0.0628327	0.00529573	1.44802e-05	0.000133054	0.006945	-0.00314917	0.00578272	0.00209148	-0.00565486	0.00412408	5.81052e-05	0.0421901	-0.000324627	-0.00128775	-0.00889016	0.0110183	-0.0399854	-0.00636246	-6.49754e-05	-0.00272201	-0.00417212	-1.61864e-06	-4.54653e-05	-0.00882205	0.00264224	2.33874e-05	-0.00105785	8.09086e-09	0.00127278	-3.78373e-06	0.00185193	0.000469908	0.00118729	0.000265963
GAATCACAGCTACTAC.1	-0.00346959	-0.00128621	-0.0389568	-0.000283875	6.0522e-05	0.00292298	0.00108143	0.00552632	-0.000249665	0.00117237	-0.00132375	-0.00360481	-0.00117612	-0.000726603	-0.00367945	-0.0433234	0.00529666	1.48416e-05	0.000133039	0.00359799	-0.00312381	0.00577266	0.00216303	-0.00557907	0.0041304	0.000104301	0.00457205	-0.000324665	-0.00109172	-0.00660481	0.00749459	0.000338435	-0.00755256	-6.44786e-05	-0.00271876	-0.00305261	-3.62098e-06	-5.09974e-05	-0.000256002	0.00256889	2.70642e-05	-0.00106918	8.14907e-09	0.00109029	-1.16013e-05	0.00185552	0.000422075	0.00118826	0.00026596
GAATCACTCCGTTGAA.1	-0.0121389	-0.000457866	-0.0989085	-0.00019291	0.0157693	0.00292292	0.00112212	0.00596033	-0.00028684	0.00143199	-0.0013818	-0.00438766	-0.00116118	-0.00848656	-0.00502507	-0.0315664	0.00528176	1.4469e-05	0.000134144	-0.00217412	-0.00407094	0.00586114	0.00211662	-0.00549649	0.00405723	5.87106e-05	0.104026	-0.000356054	-0.00189554	-0.0150323	0.0147597	-0.118536	-0.0101427	-7.92691e-05	-0.00272198	-0.00865391	5.71273e-06	-2.99104e-05	-0.0161334	0.00256915	1.53966e-05	0.000719463	8.17818e-09	0.00189837	-1.16415e-09	0.0018492	0.000465214	0.00110546	0.000265745
GAATCGTGTTAGGCTT.1	-0.00343384	-0.00127089	-0.0403625	-6.75069e-06	-0.000337227	0.00290953	0.00107558	0.00542699	-0.000249695	0.00117287	-0.00132766	-0.0036233	-0.00117615	-0.000938859	-0.00367335	-0.035756	0.00529673	1.47931e-05	0.000133021	0.00324547	-0.00311072	0.00576729	0.00212154	-0.00557685	0.00413176	0.000113768	0.00599559	-0.000324612	-0.00108573	-0.0065662	0.00740467	0.00292236	-0.00759127	-6.43384e-05	-0.00271473	-0.00294074	-3.7998e-06	-5.12712e-05	0.000404477	0.00256665	2.74815e-05	-0.00106878	8.14907e-09	0.00108478	-1.16869e-05	0.00185343	0.000415012	0.00118784	0.000265963
GAATCGTTCTGCTTTA.1	-0.00412999	-0.00131833	-0.0349274	-0.0118941	0.00640425	0.00295221	0.00109548	0.00708289	-0.000250517	0.00116578	-0.00133745	-0.0036002	-0.00117544	0.00912939	-0.00371353	-0.0512034	0.00529534	1.4592e-05	0.000133004	0.0047085	-0.00314977	0.00578776	0.00218769	-0.00559944	0.0041196	4.51021e-05	0.0378836	-0.000324925	-0.00120431	-0.0083342	0.0102752	-0.0514494	-0.00566294	-6.50989e-05	-0.002722	-0.00537449	4.09968e-06	-4.61806e-05	-0.0121326	0.00258681	2.14856e-05	-0.00108347	8.14907e-09	0.00118996	-8.66363e-06	0.0018532	0.000542656	0.00118742	0.000265962
GACACGCAGCTGCCTG.1	-0.0110434	-0.000502278	-0.0987545	0.00034232	0.0153893	0.00293026	0.00111503	0.006844	-0.000284787	0.00171191	-0.00137968	-0.00444642	-0.00116754	-0.0079494	-0.0056153	-0.0297902	0.00528675	1.45733e-05	0.000134109	-0.00255589	-0.00401363	0.00585972	0.00218744	-0.00547717	0.00406145	6.4753e-05	0.0953951	-0.000349564	-0.0018018	-0.0140205	0.0136005	-0.121889	-0.00895445	-7.78879e-05	-0.002722	-0.00837371	5.98514e-06	-3.37958e-05	-0.0157531	0.00256661	1.58027e-05	0.000980278	8.17818e-09	0.00180238	-2.45869e-07	0.00184788	0.000464737	0.00109731	0.00026541
GACACGCCACTACAGT.1	-0.00532807	-0.00133771	-0.0729438	-0.0137652	0.0122513	0.00295714	0.00108927	0.00222374	-0.00027397	0.00115157	-0.00133444	-0.00375649	-0.00117557	0.00704225	-0.00382369	-0.0798962	0.00529328	1.5188e-05	0.000133025	0.00837204	-0.00323091	0.00582184	0.00215651	-0.00577042	0.00408819	1.91489e-05	0.0684776	-0.000325901	-0.00180073	-0.012449	0.0165452	-0.0913247	-0.00615378	-6.74824e-05	-0.002722	-0.00649554	4.59701e-06	-3.53251e-05	-0.019989	0.00276203	1.71885e-05	-0.000758961	8.09086e-09	0.0017847	-2.23285e-07	0.00185105	0.000561208	0.00118718	0.00026596
GACACGCGTATCCCTC.1	-0.00386542	-0.00131695	-0.054255	-0.00298405	0.00246877	0.00296398	0.00106902	0.00446479	-0.000259674	0.00117067	-0.00129953	-0.0037725	-0.00117591	0.000462567	-0.00375954	-0.0575056	0.00529643	1.44616e-05	0.000133386	0.00337399	-0.00313634	0.00578835	0.00208296	-0.00556251	0.00411877	9.53507e-05	0.0349198	-0.000324314	-0.00127349	-0.0082987	0.00898139	-0.0019055	-0.00717666	-6.45774e-05	-0.002722	-0.00415608	1.33738e-06	-4.84716e-05	-0.00373316	0.00255981	2.50824e-05	-0.00104733	8.14907e-09	0.00127412	-7.35442e-06	0.00185432	0.000427827	0.00118692	0.000265948
GACAGCCAGATAGGGA.1	-0.00350769	-0.00125259	-0.043065	-0.000287323	0.00383982	0.00290553	0.00108577	0.0054565	-0.000248631	0.00117137	-0.00132904	-0.00356511	-0.00117615	-0.00157921	-0.00366393	-0.0349972	0.00529648	1.44392e-05	0.000133019	0.00302901	-0.00313021	0.00576922	0.00207951	-0.00557984	0.00413576	8.7779e-05	0.0312398	-0.00032427	-0.00109337	-0.00742532	0.00846888	-0.00599739	-0.00601103	-6.40255e-05	-0.002722	-0.00427355	-6.22123e-07	-4.90379e-05	-0.00486293	0.00256664	2.57678e-05	-0.00111105	8.14907e-09	0.00108754	-1.08117e-05	0.00184876	0.000480399	0.00118759	0.000265924
GACAGCCCATTGAGGG.1	-0.00457234	-0.00113988	-0.0829942	0.000982518	0.00218195	0.00290742	0.00108689	0.00504073	-0.000265269	0.00134562	-0.00132335	-0.00399037	-0.00115544	-0.0036259	-0.00387269	-0.0412642	0.00527511	1.4618e-05	0.000133492	0.00238041	-0.00323708	0.00579067	0.00212571	-0.00556012	0.00411797	0.000120053	0.0483725	-0.000328658	-0.0012601	-0.00861752	0.00865187	-0.0192149	-0.00708909	-6.6557e-05	-0.00272198	-0.00443897	4.89876e-07	-4.74695e-05	-0.00177345	0.00256313	2.56971e-05	-0.000822507	8.14907e-09	0.00126151	-7.05221e-06	0.00184719	0.000427827	0.00118175	0.000265619
GACAGCCGTAGGTGCA.1	-0.00902728	-0.000603816	-0.101666	0.000231165	0.0113851	0.00291426	0.00112486	0.00575793	-0.000275479	0.00130084	-0.00139903	-0.00438311	-0.00115282	-0.00771589	-0.00460227	-0.0415409	0.0052725	1.46665e-05	0.00013373	-0.000704907	-0.00390156	0.00584281	0.00216085	-0.00555325	0.00407241	7.60052e-05	0.0973769	-0.000347523	-0.00170727	-0.013828	0.0124596	-0.0898694	-0.00984323	-7.5039e-05	-0.002722	-0.00694728	5.0962e-06	-3.75211e-05	-0.0113349	0.00257771	1.80285e-05	7.65473e-05	8.17818e-09	0.00170728	-2.42144e-07	0.00184407	0.000472248	0.00114331	0.000265656
GACCAATGTAGGAAAG.1	-0.00543948	-0.000991062	-0.0804123	0.000854592	0.00135456	0.0029061	0.00111247	0.00517171	-0.00026682	0.00120896	-0.00133966	-0.00368966	-0.00117536	-0.0035456	-0.0039536	-0.0442946	0.00529062	1.52364e-05	0.000133939	0.00270222	-0.00340554	0.005803	0.00216235	-0.00551721	0.0041062	0.000118552	0.0450036	-0.000329537	-0.00128871	-0.00834942	0.00838217	0.00567049	-0.00621824	-6.67575e-05	-0.00272185	-0.00563681	-9.05246e-07	-4.75775e-05	-0.00137913	0.00256026	2.59057e-05	-0.000807758	8.61473e-09	0.00128993	-7.91182e-06	0.00185664	0.000469178	0.00115168	0.000264205
GACCAATTCCCAGTGG.1	-0.0334752	0.00635191	0.0156411	-0.00422074	0.010899	0.00390161	0.00131294	0.000786261	-0.000399306	0.00236437	-0.00111636	-0.00426619	-0.000867228	-0.0245131	-0.013725	0.00518871	0.00489888	3.21679e-05	0.000136895	-0.0070969	-0.0130412	0.00613452	0.00388228	-0.00495227	0.00391246	7.57596e-06	0.0212178	-0.000418117	-0.00375561	-0.0338625	0.048782	-0.0128077	-0.0246026	-0.000156045	-0.00272199	-0.0324084	4.82406e-05	-4.92856e-06	-0.00330931	0.00269371	5.99772e-06	0.0126331	3.39933e-08	0.00367471	9.76762e-05	0.00169562	0.00310801	0.000770776	0.000243483
GACCAATTCGTTAGAC.1	-0.00512154	-0.00100102	-0.0771479	0.000854498	0.00183618	0.002907	0.00110117	0.00509026	-0.000265377	0.0012248	-0.001331	-0.00375611	-0.0011715	-0.00330042	-0.00390506	-0.0449881	0.00528872	1.45733e-05	0.000134138	0.00265459	-0.00339265	0.00580027	0.0021576	-0.00554498	0.00410983	0.000118246	0.0426161	-0.00032868	-0.00126239	-0.00818013	0.00838884	0.00736767	-0.00661375	-6.64646e-05	-0.00272174	-0.00517705	1.71363e-07	-4.87082e-05	-0.00140306	0.00256286	2.58647e-05	-0.000813499	8.3819e-09	0.0012642	-7.50436e-06	0.0018549	0.000457734	0.00116613	0.000264809
GACCCAGGTGTTGCCG.1	-0.00610702	-0.00143742	-0.106218	-0.00655264	0.0139022	0.0031147	0.00108623	0.00140636	-0.000284194	0.00114858	-0.00123855	-0.00390651	-0.00117314	-0.00217924	-0.00395253	-0.0418526	0.0052908	2.16402e-05	0.000133308	0.00491874	-0.00330171	0.00585256	0.00232471	-0.00559723	0.00406169	3.67537e-05	0.0831732	-0.000327444	-0.00190145	-0.0146427	0.0173237	-0.0701155	-0.00888823	-7.05148e-05	-0.00272137	-0.00900766	3.58932e-06	-2.7949e-05	-0.0154578	0.00260858	1.7954e-05	0.000362534	8.84756e-09	0.00190002	-9.08039e-09	0.00184427	0.000605747	0.00118042	0.000265505
GACCCTTAGTAGTCTC.1	-0.00331189	-0.00126091	-0.0282575	-0.00276364	-0.00138519	0.00290396	0.00107235	0.00547856	-0.000248584	0.00117417	-0.00132899	-0.00359461	-0.00117615	0.00188899	-0.00366486	-0.0275603	0.00529667	1.44653e-05	0.000133066	0.00301091	-0.00309475	0.00573406	0.00208064	-0.00557135	0.0041396	0.000125183	0.00402626	-0.000324307	-0.00104355	-0.00647692	0.00719184	0.0178026	-0.00709026	-6.39915e-05	-0.00269036	-0.00280482	-3.81097e-06	-5.11073e-05	0.00157461	0.00255847	2.83793e-05	-0.00107807	8.14907e-09	0.00104165	-1.32704e-05	0.00184992	0.000412345	0.00118881	0.000265963
GACCCTTCAGTTAGGG.1	-0.00786194	-0.00147538	-0.0753929	-0.0238403	0.0250176	0.00306471	0.00116557	0.00155874	-0.000279565	0.00112025	-0.00136778	-0.00347195	-0.00117385	0.0146436	-0.00382444	-0.0966429	0.00528858	1.89804e-05	0.000132842	0.0190523	-0.00348071	0.00585039	0.00225459	-0.00579122	0.00405983	2.15392e-06	0.0441801	-0.00032906	-0.00210219	-0.0145764	0.0231156	-0.126204	-0.00638137	-6.94948e-05	-0.00272201	-0.00879112	6.68131e-06	-2.72579e-05	-0.0439478	0.00278372	1.30422e-05	-0.00137899	2.79397e-09	0.00209298	7.567e-09	0.00186049	0.000722975	0.00118732	0.000265954
GACCCTTGTCCACTTC.1	-0.00395274	-0.00126862	-0.0813272	-0.00199497	0.00299937	0.00298527	0.00107656	0.00414056	-0.000263093	0.00116784	-0.00127595	-0.00379009	-0.00117564	-0.00160984	-0.00375534	-0.0648363	0.00529588	1.60336e-05	0.000133172	0.0039894	-0.00322321	0.00580196	0.00216776	-0.00559676	0.00410847	8.7874e-05	0.0476845	-0.000325492	-0.00134604	-0.0093918	0.00965544	-0.0244432	-0.00715913	-6.73918e-05	-0.00271976	-0.00472623	-2.06195e-06	-3.89293e-05	-0.00336307	0.00259581	2.39871e-05	-0.000827923	8.3819e-09	0.00134414	-4.28641e-06	0.00184629	0.000454113	0.00118624	0.000265956
GACCCTTTCCGGCTTT.1	-0.00396865	-0.00129669	-0.0690575	-0.002528	0.00187044	0.00299069	0.00106895	0.00431922	-0.000261338	0.00117063	-0.00128462	-0.00374925	-0.00117575	-0.000305602	-0.0037524	-0.0527746	0.00529628	1.46106e-05	0.000133388	0.00337072	-0.00318377	0.00579294	0.00209705	-0.00556876	0.00411514	9.85153e-05	0.040413	-0.000324426	-0.00127876	-0.00857884	0.00902681	-0.00523084	-0.00695965	-6.50212e-05	-0.00272163	-0.00461781	2.63937e-06	-4.56087e-05	-0.00269142	0.00256492	2.50153e-05	-0.000967838	8.14907e-09	0.00127851	-5.79725e-06	0.00185318	0.000433609	0.00118594	0.000265954
GACCGTGTCAGCAGAG.1	-0.00389814	-0.0012762	-0.0465022	-0.00585853	0.00461849	0.00290885	0.00110319	0.00341621	-0.000253177	0.00116875	-0.00133578	-0.0035928	-0.00117567	0.00357117	-0.00367848	-0.0714334	0.00529556	1.4469e-05	0.000132993	0.00474243	-0.00315718	0.00577903	0.00209643	-0.00561881	0.00412608	6.28028e-05	0.0338919	-0.000324344	-0.00116619	-0.00785341	0.0104411	-0.0285751	-0.00706374	-6.43001e-05	-0.002722	-0.00381416	-2.70084e-06	-4.72963e-05	-0.00761276	0.00260557	2.35513e-05	-0.00106551	8.03266e-09	0.00115376	-4.71692e-06	0.00185213	0.000472292	0.00118757	0.000265963
GACCTTCTCGGCTATA.1	-0.00881574	-0.00175534	-0.0480118	-0.0299929	0.00221864	0.00330313	0.00122454	0.00311127	-0.000286579	0.00107561	-0.00139153	-0.00334284	-0.00117599	0.0166295	-0.00416962	-0.0836897	0.00528791	2.27094e-05	0.000133121	0.0465973	-0.00370872	0.00587748	0.00231655	-0.00587349	0.00404061	-1.10306e-05	0.0159717	-0.000332607	-0.0025483	-0.0185589	0.0291257	-0.140687	-0.00834874	-7.51827e-05	-0.00272209	-0.011605	1.42222e-05	-1.70912e-05	-0.0478681	0.00286981	1.20476e-05	-0.00113631	-2.04891e-08	0.00253753	1.52271e-07	0.00190162	0.000966281	0.00119466	0.00026596
GACGTTAGTGAGGAAA.1	-0.00384268	-0.00127074	-0.0592321	-0.00478103	0.00447395	0.00290359	0.00108321	0.00276304	-0.000253446	0.00116759	-0.00133532	-0.00370134	-0.00117612	0.00195126	-0.00367813	-0.0601514	0.00529569	1.4659e-05	0.000132998	0.00444298	-0.0031308	0.00577876	0.00208941	-0.0056271	0.00412747	6.26817e-05	0.0489503	-0.000324471	-0.00120717	-0.00851887	0.0109165	-0.0296705	-0.00641011	-6.45154e-05	-0.002722	-0.00376996	2.45869e-07	-4.448e-05	-0.0067969	0.00261422	2.36221e-05	-0.00103074	8.14907e-09	0.00119371	-3.39444e-06	0.00184962	0.000439093	0.00118759	0.000265963
GACGTTATCAACACGT.1	-0.00379943	-0.00127598	-0.0460627	-0.00373183	0.00418659	0.00291113	0.00109089	0.00383624	-0.000252061	0.00116976	-0.00133394	-0.00360682	-0.00117591	0.00171777	-0.00367616	-0.0615274	0.00529597	1.44504e-05	0.000132995	0.00394414	-0.00313612	0.00577562	0.00209357	-0.00560431	0.00412956	7.16243e-05	0.033178	-0.000324411	-0.0011433	-0.00760654	0.00979652	-0.0196645	-0.00696139	-6.43693e-05	-0.002722	-0.00381032	-3.02866e-06	-4.88777e-05	-0.00619647	0.0025911	2.4192e-05	-0.00107576	8.11997e-09	0.00113182	-5.95371e-06	0.00185154	0.000466838	0.00118759	0.000265963
GACTATGAGTTGCCCG.1	-0.00408943	-0.00126113	-0.0459178	-0.00719854	0.00499248	0.00291627	0.00108128	0.00446158	-0.000255778	0.00116572	-0.00133758	-0.00365908	-0.00117574	0.00422693	-0.0037034	-0.0467507	0.00529562	1.44616e-05	0.000132991	0.00572817	-0.00314903	0.00578424	0.00220617	-0.00559935	0.00412156	5.68293e-05	0.0494639	-0.000324687	-0.00123178	-0.00860962	0.0111766	-0.0478924	-0.00553997	-6.47906e-05	-0.00272201	-0.00536725	1.80677e-06	-4.56441e-05	-0.00973034	0.0025874	2.2281e-05	-0.00104798	8.11997e-09	0.00121521	-6.90715e-06	0.00183515	0.000516221	0.00118749	0.000265963
GACTATGGTCCTCAGG.1	-0.00769112	-0.00068487	-0.0956339	0.000486913	0.00737456	0.00291107	0.00110594	0.00646273	-0.000273169	0.00137394	-0.00135115	-0.00419532	-0.00116262	-0.00600039	-0.00435703	-0.0298435	0.00528074	1.45771e-05	0.00013379	-0.0001347	-0.0037367	0.00582545	0.00210465	-0.00553171	0.00408818	9.85209e-05	0.0874507	-0.000340609	-0.00152031	-0.0116809	0.0102178	-0.0627121	-0.00898382	-7.12963e-05	-0.00272212	-0.00866374	5.84405e-06	-4.33493e-05	-0.0068025	0.00256391	2.0368e-05	-0.000546344	8.14907e-09	0.00152055	-1.30967e-06	0.00184921	0.000468239	0.00115417	0.000265209
GACTCAACACAAGGTG.1	-0.00558576	-0.00140186	-0.10235	-0.00210148	0.00936939	0.0030513	0.00109117	0.000796596	-0.000287491	0.00115411	-0.00106791	-0.00404091	-0.0011739	-0.00619823	-0.00404898	-0.0288004	0.00529235	3.13297e-05	0.000133172	0.00169386	-0.0032538	0.00585841	0.00225376	-0.00552063	0.00407438	6.54701e-05	0.0857531	-0.000325909	-0.00183564	-0.0143902	0.0156592	-0.037975	-0.0091895	-7.4673e-05	-0.00272394	-0.00860289	1.77883e-06	-3.78378e-05	-0.00395071	0.00257133	1.88667e-05	0.000872403	1.14087e-08	0.00183696	-3.48315e-07	0.00183527	0.000492886	0.00117848	0.000264928
GACTCAACATCACAGT.1	-0.00333778	-0.00125582	-0.0366155	-0.00248584	-0.0013262	0.00290526	0.001069	0.00503093	-0.000250502	0.00117346	-0.00132883	-0.00362696	-0.00117616	0.00118543	-0.00366933	-0.0309308	0.0052965	1.45435e-05	0.000133013	0.00351021	-0.00310012	0.00571433	0.00208438	-0.00557415	0.00413707	0.000117337	0.015365	-0.000324352	-0.00109149	-0.00692964	0.00775341	0.0100927	-0.00722177	-6.42877e-05	-0.00266753	-0.00278564	-3.60049e-06	-4.9876e-05	0.00082925	0.00256197	2.76975e-05	-0.00106389	8.14907e-09	0.00108737	-1.17654e-05	0.00184184	0.000413626	0.00118817	0.000265963
GACTCAAGTCACATTG.1	-0.00329281	-0.00126668	-0.0289372	-0.000653378	-0.00139923	0.00290414	0.00107684	0.0057916	-0.000248036	0.00117433	-0.00132993	-0.00358195	-0.00117597	-7.72122e-05	-0.003665	-0.0239202	0.00529654	1.45771e-05	0.000133079	0.00292759	-0.00310026	0.00576454	0.00208088	-0.00556998	0.00413978	0.00012671	0.00139179	-0.000324307	-0.00102134	-0.00631757	0.00695422	0.0187715	-0.00707992	-6.39395e-05	-0.00272109	-0.00278433	-3.82774e-06	-5.14574e-05	0.00170475	0.0025572	2.85618e-05	-0.00108131	8.14907e-09	0.00101935	-1.39074e-05	0.0018562	0.000413775	0.00118896	0.000265963
GACTCTCAGTGGTTCT.1	-0.00631852	-0.00135618	-0.062785	-0.0208803	0.019786	0.00296433	0.00109593	0.00456968	-0.00026192	0.00115613	-0.00134508	-0.00358359	-0.00117281	0.015621	-0.00374137	-0.0861637	0.0052918	1.44541e-05	0.000133099	0.00903237	-0.00321564	0.0058112	0.00211978	-0.00581117	0.00409701	2.1426e-05	0.0482939	-0.000325037	-0.00149775	-0.0107943	0.0142343	-0.0918254	-0.00804385	-6.56263e-05	-0.002722	-0.00607571	-1.81608e-06	-3.86611e-05	-0.0299209	0.00279874	1.85054e-05	-0.00106797	8.03266e-09	0.00147498	-4.31901e-07	0.00184875	0.000638425	0.00118728	0.000265954
GACTGATCAACGTATC.1	-0.00383634	-0.00126966	-0.0559117	-0.00397387	0.00354655	0.00290642	0.00108495	0.00345785	-0.00025283	0.00116844	-0.00133619	-0.00365433	-0.00117604	0.0014562	-0.00368215	-0.0548344	0.00529584	1.45398e-05	0.000132993	0.00463241	-0.00313427	0.0057761	0.00210321	-0.00561014	0.00412945	6.68075e-05	0.0446218	-0.000324404	-0.00117331	-0.00815865	0.0103138	-0.0276788	-0.00632143	-6.43785e-05	-0.002722	-0.00390041	-1.33738e-06	-4.73093e-05	-0.00620735	0.00259698	2.38307e-05	-0.00103995	8.11997e-09	0.00116075	-5.04847e-06	0.00184954	0.000446826	0.00118756	0.000265963
GAGACTTAGCGCTGAA.1	-0.00350953	-0.00126298	-0.0519607	-0.00251088	0.000754278	0.00290845	0.00107032	0.00378316	-0.000256068	0.00117088	-0.00133594	-0.00370935	-0.00117614	0.00028971	-0.00368472	-0.0330958	0.0052963	1.55978e-05	0.000132956	0.00438711	-0.00311518	0.00577771	0.0020965	-0.0055923	0.00412787	8.7915e-05	0.0427282	-0.000324419	-0.00114876	-0.00792239	0.00962248	-0.0130962	-0.00618955	-6.4397e-05	-0.002722	-0.00406438	1.86265e-06	-4.74826e-05	-0.00254473	0.00258065	2.58014e-05	-0.00101258	8.14907e-09	0.00113878	-8.40309e-06	0.00184596	0.00045009	0.00118789	0.000265962
GAGACTTGTCGGAACA.1	-0.00344186	-0.00122876	-0.0366286	-0.00027935	0.00315167	0.00291457	0.00107385	0.00560493	-0.000248445	0.00117182	-0.00133664	-0.00363012	-0.00117617	-0.00108719	-0.0036684	-0.0243577	0.00529669	1.44467e-05	0.000133026	0.00277134	-0.00314252	0.00576827	0.00208299	-0.00557902	0.00413671	0.000102267	0.0231124	-0.000324277	-0.00106498	-0.00699997	0.007873	0.00198993	-0.00647689	-6.39277e-05	-0.002722	-0.00419219	-3.67127e-06	-4.96563e-05	-0.00402087	0.00256585	2.66619e-05	-0.00109426	8.14907e-09	0.00105898	-1.24248e-05	0.00184775	0.000484005	0.00118761	0.000265956
GAGACTTGTTAACAGA.1	-0.00357262	-0.00126101	-0.0412065	-0.00222125	0.00474508	0.0029127	0.00108062	0.0057202	-0.000248534	0.00117016	-0.00133064	-0.00358669	-0.00117612	0.000378566	-0.00367247	-0.0349386	0.00529583	1.44728e-05	0.000133013	0.00369884	-0.00312254	0.00577746	0.00208059	-0.00558142	0.00412937	7.83615e-05	0.0310981	-0.000324523	-0.00109061	-0.00742191	0.00891779	-0.0203546	-0.00597057	-6.42604e-05	-0.00272209	-0.00479132	3.01935e-06	-4.86635e-05	-0.00709963	0.00256841	2.49483e-05	-0.00109644	8.11997e-09	0.00108079	-1.10946e-05	0.00184447	0.000509009	0.00118761	0.000265805
GAGAGGTCATTGCCTC.1	-0.00395289	-0.00127925	-0.0587085	-0.00622103	0.00688532	0.00290529	0.00108741	0.00227672	-0.000254639	0.00116596	-0.00133607	-0.00370464	-0.00117606	0.00300121	-0.00368452	-0.070776	0.00529553	1.51806e-05	0.000132935	0.00476548	-0.00314345	0.00578339	0.00208287	-0.00563124	0.00412337	5.64475e-05	0.052356	-0.000324672	-0.00128125	-0.00890703	0.0118967	-0.0420924	-0.00657273	-6.48906e-05	-0.002722	-0.00401905	-8.3074e-07	-4.30532e-05	-0.00988275	0.00261872	2.26907e-05	-0.00102381	8.11997e-09	0.00126642	-2.34763e-06	0.00185207	0.000446111	0.0011875	0.000265963
GAGCCTGGTAGTTAGA.1	-0.00398606	-0.00138575	-0.0487438	-0.00785338	0.00774663	0.0030298	0.00109969	0.00434438	-0.00025148	0.00116668	-0.00130508	-0.00361746	-0.0011761	0.00507142	-0.00368548	-0.0589523	0.00529647	1.44914e-05	0.000132991	0.00527155	-0.00317858	0.00579442	0.00212811	-0.00559895	0.0041137	4.92968e-05	0.0388335	-0.000324903	-0.00119327	-0.0083565	0.0120842	-0.0422164	-0.00597033	-6.49986e-05	-0.002722	-0.00436786	9.49949e-07	-4.9036e-05	-0.0134413	0.00258577	2.14987e-05	-0.00112517	8.09086e-09	0.00117891	-6.97048e-06	0.00185157	0.000539005	0.00118753	0.000265853
GAGCTGCGTTTCGCTC.1	-0.00408803	-0.00116084	-0.0684215	0.00097468	0.000269854	0.00290515	0.00108548	0.00523314	-0.000257183	0.00128152	-0.00133403	-0.00382892	-0.00117042	-0.00258622	-0.00379175	-0.0299147	0.00529052	1.44765e-05	0.000133613	0.00236934	-0.00321092	0.00578049	0.00208425	-0.00556096	0.00412707	0.000127016	0.0336207	-0.000326773	-0.00115047	-0.00743191	0.00787464	0.00370198	-0.0071708	-6.53106e-05	-0.002722	-0.00359064	-1.92225e-06	-4.94868e-05	0.000941634	0.00255714	2.72729e-05	-0.000958715	8.14907e-09	0.0011528	-1.03717e-05	0.00185615	0.000420138	0.00118104	0.000265792
GAGGCCTTCACGATAC.1	-0.00390282	-0.00126931	-0.0588567	-0.00555082	0.00271671	0.00290531	0.00108062	0.00350983	-0.000253695	0.00116776	-0.0013399	-0.00365956	-0.00117613	0.00289848	-0.00368716	-0.0524047	0.00529594	1.45845e-05	0.000132995	0.00543274	-0.00313242	0.00577767	0.00214561	-0.00560422	0.00412812	6.48648e-05	0.0459086	-0.000324434	-0.00118861	-0.00829864	0.0104877	-0.0328451	-0.00598593	-6.44899e-05	-0.00272201	-0.00431547	1.06543e-06	-4.71696e-05	-0.00617251	0.00259111	2.35587e-05	-0.00105169	8.11997e-09	0.00117505	-5.66849e-06	0.00184954	0.00045605	0.00118754	0.000265963
GAGGCCTTCGATTGGT.1	-0.00872714	-0.00152417	-0.0796251	-0.0242079	0.0129326	0.00312562	0.00112863	0.00218342	-0.000290212	0.00111167	-0.00131088	-0.00368877	-0.00117513	0.0129447	-0.00397717	-0.0667971	0.00529037	2.27727e-05	0.000133073	0.0211555	-0.00349944	0.00587622	0.00226649	-0.00577804	0.00404235	5.98095e-06	0.0400393	-0.00033067	-0.00216524	-0.0169082	0.0246608	-0.126926	-0.00709625	-7.2416e-05	-0.00272204	-0.0112108	9.44547e-06	-2.19326e-05	-0.0342484	0.00277489	1.27852e-05	8.16192e-05	7.45058e-09	0.00215958	2.98023e-08	0.00184353	0.000706598	0.00118508	0.000265945
GAGGGTAGTTCCGTTC.1	-0.00506159	-0.00133457	-0.0919097	-0.00411411	0.0074337	0.00299503	0.00107187	0.00224283	-0.000271094	0.00116256	-0.001292	-0.00391067	-0.00117576	-0.00190274	-0.00376794	-0.0549209	0.00529537	1.64136e-05	0.000133172	0.00502914	-0.003196	0.00581638	0.00216073	-0.00561903	0.00409379	5.60246e-05	0.0810016	-0.000325015	-0.00159039	-0.0119247	0.0132929	-0.0438844	-0.00692352	-6.68805e-05	-0.00272177	-0.00693032	-5.58794e-09	-3.39709e-05	-0.00896379	0.00261699	2.12081e-05	-0.000771049	8.14907e-09	0.00158277	-5.40866e-07	0.00183927	0.000488147	0.0011866	0.00026595
GAGGGTAGTTCGAAGG.1	-0.00847954	-0.00175207	-0.0672873	-0.00821169	0.0152007	0.0033122	0.0011153	-0.00627062	-0.000296641	0.00110125	-0.00126094	-0.00388055	-0.00114937	-0.00808448	-0.00392728	-0.0457559	0.00526117	2.98694e-05	0.000132821	0.0153809	-0.00344481	0.00589064	0.00230401	-0.00576292	0.00403539	8.17888e-06	0.0510806	-0.000332667	-0.0028661	-0.0221262	0.034233	-0.111632	-0.00816605	-8.08593e-05	-0.0027193	-0.0163858	8.37818e-06	-1.31531e-05	-0.0306286	0.00281587	1.22264e-05	0.000195164	1.11468e-08	0.00283086	2.87476e-06	0.00191062	0.000921592	0.00119101	0.000265198
GAGTCATAGCTGAAGC.1	-0.0180877	0.000530801	-0.0515293	0.000334174	0.014097	0.00291754	0.00113385	0.00773531	-0.000292248	0.00809381	-0.00141952	-0.00623786	-0.00117321	-0.0068322	-0.00883548	-0.0387811	0.00529338	1.63652e-05	0.000134474	-0.00355608	-0.00499655	0.00590153	0.00239608	-0.00543316	0.00403884	6.7398e-05	0.0894417	-0.00038044	-0.00164674	-0.0147067	0.0155043	-0.167144	-0.00966476	-9.10978e-05	-0.00272279	-0.0100671	5.71739e-06	-3.6085e-05	-0.0153302	0.00256151	1.31996e-05	0.00233813	8.44011e-09	0.00165284	2.21189e-08	0.00184815	0.000532448	0.00102524	0.00026568
GAGTCTACAGGTCCGT.1	-0.00449529	-0.00130739	-0.0827279	-0.00490997	0.0064019	0.00295274	0.00108481	0.00269885	-0.000265295	0.00116245	-0.00131953	-0.00376485	-0.00117557	0.000330864	-0.00375305	-0.0575835	0.00529514	1.58399e-05	0.00013298	0.00634637	-0.00317782	0.00579725	0.00217223	-0.00564323	0.00411157	5.63581e-05	0.0680097	-0.000325	-0.00146071	-0.0103217	0.0123288	-0.0511057	-0.0069372	-6.64648e-05	-0.00272209	-0.00518581	2.55369e-06	-3.56138e-05	-0.0101939	0.00263377	2.17315e-05	-0.000799227	8.14907e-09	0.00144786	-1.86311e-06	0.00184701	0.000467032	0.00118764	0.000265956
GAGTGAGGTGATATAG.1	-0.00356056	-0.00128119	-0.0471376	-0.00158222	0.0041544	0.00291915	0.00107918	0.00454873	-0.000249273	0.00117133	-0.00133443	-0.00361698	-0.00117617	8.30553e-06	-0.00366945	-0.0409819	0.00529652	1.4443e-05	0.000133021	0.00297964	-0.00311131	0.00577014	0.00209822	-0.00558363	0.00413526	7.68285e-05	0.0286004	-0.000324486	-0.0010846	-0.00718943	0.00895775	-0.00755611	-0.00651656	-6.44279e-05	-0.002722	-0.00375177	-3.03425e-06	-5.03305e-05	-0.00521541	0.00257044	2.53916e-05	-0.00109036	8.14907e-09	0.00107561	-8.93022e-06	0.00185323	0.000453934	0.0011876	0.000265963
GAGTGTTAGCGCGTTC.1	-0.0104049	-0.000347489	-0.0906292	0.00101603	0.00983384	0.00294031	0.00111961	0.00410392	-0.000282711	0.00229691	-0.00131422	-0.00468229	-0.00116679	-0.00701121	-0.00608387	-0.0416587	0.00528216	1.45659e-05	0.000134749	0.000920398	-0.00414149	0.00584641	0.0023248	-0.00545838	0.00406999	8.89059e-05	0.0851917	-0.00034651	-0.00159862	-0.0126474	0.0131521	-0.0914569	-0.00892507	-7.54497e-05	-0.00272289	-0.00800541	5.38677e-06	-4.07137e-05	-0.0098578	0.00256108	1.71531e-05	0.000410719	8.17818e-09	0.00159869	-1.30199e-06	0.00184546	0.00044468	0.00112763	0.000264121
GAGTGTTCACCTCAGG.1	-0.00351503	-0.00125933	-0.0394304	-0.00148493	0.00446777	0.00291597	0.00108176	0.00573296	-0.000248414	0.00117003	-0.00133045	-0.00357862	-0.00117576	-0.000453871	-0.00367212	-0.0375219	0.00529512	1.44579e-05	0.000133013	0.00354862	-0.00313216	0.0057782	0.00208124	-0.005587	0.00412856	8.04495e-05	0.0326114	-0.000324493	-0.00109307	-0.00750774	0.00918166	-0.0224832	-0.00595187	-6.42351e-05	-0.00272203	-0.00437537	2.00048e-06	-4.79799e-05	-0.00680652	0.00257393	2.46838e-05	-0.0011064	8.09086e-09	0.00108224	-1.07891e-05	0.0018439	0.000498697	0.00118761	0.000265691
GAGTTACCATATAGCC.1	-0.0189475	0.0011096	-0.0516649	-0.00303331	0.0219979	0.00302347	0.00121104	0.00236711	-0.000297742	0.00178198	-0.00143162	-0.00429811	-0.00095558	-0.012282	-0.00766246	-0.0258805	0.00505199	2.54288e-05	0.000134943	-0.00309724	-0.006024	0.00593307	0.00233893	-0.00541939	0.00403022	2.86996e-05	0.0736752	-0.000371082	-0.0022057	-0.0214411	0.0238214	-0.120579	-0.0131791	-9.67647e-05	-0.00272744	-0.016369	3.66755e-06	-2.28081e-05	-0.00905693	0.00262238	1.2611e-05	0.00702021	1.2602e-08	0.00218053	4.18723e-06	0.00174107	0.0013198	0.000938266	0.000259602
GAGTTACGTTCTGAGT.1	-0.00385448	-0.00128674	-0.0434073	-0.00746935	0.00474322	0.00292267	0.00108667	0.005729	-0.000251462	0.00116768	-0.0013406	-0.00361111	-0.00117602	0.00496217	-0.00369572	-0.0452016	0.00529602	1.45286e-05	0.000132998	0.00510758	-0.00313645	0.00578155	0.00215809	-0.00559072	0.00412517	6.059e-05	0.037873	-0.000324694	-0.00117698	-0.00809891	0.0100142	-0.0408799	-0.00575902	-6.47971e-05	-0.00272203	-0.00493354	9.25735e-07	-4.79016e-05	-0.00935602	0.00257778	2.28286e-05	-0.00109208	8.14907e-09	0.00116285	-8.00821e-06	0.00184844	0.000505865	0.00118753	0.000265963
GAGTTACTCACTTCTA.1	-0.00705444	-0.00155999	-0.0838685	-0.00344119	0.0118224	0.00316869	0.00110045	0.00170593	-0.000294653	0.00114009	-0.000961581	-0.00396785	-0.00116801	-0.0072721	-0.00417566	-0.0280472	0.00527618	3.46042e-05	0.000132617	0.000789254	-0.00332802	0.00588753	0.00294821	-0.00549343	0.0040555	4.55715e-05	0.0838287	-0.000327928	-0.00209297	-0.0167385	0.0192376	-0.0664468	-0.0110295	-7.93139e-05	-0.00272446	-0.0114973	4.96581e-06	-3.41535e-05	-0.00768271	0.00258501	1.50409e-05	0.00198535	1.53668e-08	0.00208462	-7.21775e-09	0.00183612	0.000561759	0.00117157	0.000261735
GAGTTTGCATCATTGG.1	-0.00478591	-0.00134154	-0.0658217	-0.00872718	0.00697034	0.00296162	0.001094	0.00490985	-0.000267646	0.00115838	-0.00133894	-0.00365305	-0.00117591	0.00380307	-0.00375492	-0.0823251	0.00529449	1.51619e-05	0.000133155	0.010566	-0.00320371	0.00580618	0.00216778	-0.00573266	0.0041034	2.79825e-05	0.047672	-0.000325231	-0.00159231	-0.0105545	0.0128953	-0.067783	-0.00631387	-6.61784e-05	-0.00272209	-0.0055584	-3.12924e-07	-3.90224e-05	-0.0164994	0.00272232	1.90921e-05	-0.00106107	7.79983e-09	0.0015759	-1.27079e-06	0.00185145	0.000562325	0.00118636	0.000265962
GATAGAATCCGATAGT.1	-0.0129402	0.000582523	-0.0949999	0.000126774	0.0169275	0.00298981	0.0011708	0.00198916	-0.000293434	0.00136855	-0.00143289	-0.00433761	-0.00113182	-0.0117419	-0.00565195	-0.0421473	0.00524819	1.66111e-05	0.000134129	0.00135124	-0.00534283	0.00588191	0.00226302	-0.00552395	0.00404181	4.69461e-05	0.0983103	-0.000363624	-0.00204336	-0.0178818	0.0190773	-0.133804	-0.0116953	-8.4633e-05	-0.00272215	-0.0115056	2.21468e-06	-2.30167e-05	-0.0184212	0.00259657	1.39512e-05	0.00198992	8.84756e-09	0.00204593	8.96398e-08	0.00183345	0.000723243	0.00103171	0.00026435
GATCACACAATGACCT.1	-0.0220781	0.00172243	-0.0485908	-0.00194114	0.0226547	0.00306834	0.00123124	0.000861193	-0.000297736	0.00183795	-0.00133109	-0.00443777	-0.000933028	-0.0155932	-0.0084402	-0.0228226	0.00501621	1.99676e-05	0.000135882	-0.00450163	-0.00677952	0.00591639	0.00248067	-0.00533456	0.00402772	2.17948e-05	0.0654446	-0.000392837	-0.0025308	-0.0237399	0.0301768	-0.150689	-0.0158154	-0.000105571	-0.00272328	-0.0202388	9.25176e-06	-1.70358e-05	-0.0136535	0.00267747	1.20704e-05	0.00729355	1.01281e-08	0.00255601	1.19773e-05	0.00179885	0.00160468	0.000821456	0.000254417
GATCACAGTCTACGTA.1	-0.00337398	-0.0012615	-0.0425754	0.00021693	-0.000725554	0.00290578	0.00107363	0.00544384	-0.000249676	0.00117386	-0.00133171	-0.00363744	-0.00117616	-0.00121426	-0.00367948	-0.0253414	0.00529673	1.47112e-05	0.000133131	0.00258737	-0.00310666	0.00577073	0.00207991	-0.00556769	0.00413581	0.000128422	0.0112307	-0.000324463	-0.0010864	-0.00664303	0.00725165	0.0161979	-0.00719427	-6.47077e-05	-0.00272194	-0.00286224	-3.5651e-06	-5.13922e-05	0.00162438	0.00255652	2.81073e-05	-0.00105234	8.14907e-09	0.00108487	-1.18436e-05	0.0018562	0.000411242	0.00118747	0.000265963
GATCAGTGTGACTGTT.1	-0.00363887	-0.0012239	-0.0424288	0.00081143	-0.00131297	0.00290348	0.0010818	0.00543412	-0.000250306	0.00117601	-0.00133459	-0.00359663	-0.00117603	-0.00190136	-0.00368341	-0.0161462	0.00529626	1.49943e-05	0.000133106	0.00265813	-0.00314101	0.00577158	0.0020797	-0.00556074	0.00413353	0.000132315	0.0173465	-0.000325186	-0.00105149	-0.00668099	0.00737585	0.0145014	-0.00736515	-6.41656e-05	-0.002722	-0.00315294	-3.58e-06	-5.09899e-05	0.0012815	0.00255525	2.83942e-05	-0.00107394	8.14907e-09	0.00105238	-1.32476e-05	0.00185755	0.000416204	0.00118186	0.000265814
GATCATGGTCCGAAGA.1	-0.00455259	-0.00133487	-0.0905236	-0.00471021	0.00697641	0.00302178	0.00106319	0.00306156	-0.000272218	0.00116495	-0.00121894	-0.00388423	-0.00117578	-0.000946414	-0.00377909	-0.0533383	0.00529517	1.66856e-05	0.000133317	0.00411238	-0.00319359	0.00581019	0.00210751	-0.00558239	0.00409456	6.9024e-05	0.0597271	-0.000325045	-0.00153129	-0.0115764	0.0111975	-0.0228425	-0.00615503	-6.64672e-05	-0.00271783	-0.00619301	-1.16788e-06	-3.41088e-05	-0.00296998	0.00258997	2.1724e-05	-0.000928186	8.3819e-09	0.00152588	-9.31323e-07	0.00184377	0.000454277	0.00118497	0.000265943
GATCGTACATTCATCT.1	-0.00331641	-0.00126772	-0.0308399	-0.000209856	-0.000924252	0.00290459	0.00107877	0.00582386	-0.000248032	0.00117448	-0.00133108	-0.00359196	-0.00117602	-0.000502305	-0.00366744	-0.0237484	0.00529663	1.45324e-05	0.000133093	0.00293828	-0.00311013	0.00576653	0.00208035	-0.00556769	0.00413882	0.000124929	0.000937149	-0.000324329	-0.00103018	-0.00630797	0.00693888	0.0181571	-0.00710424	-6.40009e-05	-0.002722	-0.00279473	-3.77558e-06	-5.15189e-05	0.00155345	0.00255616	2.85245e-05	-0.00108335	8.14907e-09	0.00102895	-1.39966e-05	0.0018573	0.000413448	0.00118908	0.000265962
GATCGTAGTGCCCAGT.1	-0.00531033	-0.00142079	-0.101579	-0.00670783	0.0106623	0.00304577	0.00106983	0.00179955	-0.000279451	0.00115279	-0.00118789	-0.00412366	-0.00117505	-0.00184713	-0.0038235	-0.0365686	0.00529472	1.69873e-05	0.000133311	0.00497289	-0.00318598	0.00583741	0.00210304	-0.00561601	0.00407391	5.03846e-05	0.0801042	-0.000325581	-0.00182358	-0.014703	0.0161655	-0.0585494	-0.00698929	-6.93909e-05	-0.0027214	-0.00943166	2.21468e-06	-2.97613e-05	-0.011582	0.00261606	1.80881e-05	-0.000552516	8.3819e-09	0.00182221	-2.00234e-08	0.00184923	0.00049217	0.001182	0.000265894
GATGACTTCAACTGGT.1	-0.0144335	0.00213829	-0.0716176	-0.00276442	0.0279652	0.00313437	0.00127636	0.000550197	-0.00029749	0.00143106	-0.00131265	-0.00396098	-0.00102893	-0.0157273	-0.00526062	-0.0249786	0.00510804	3.03276e-05	0.000133807	-0.0111019	-0.00727006	0.00592741	0.00230211	-0.00543906	0.00403295	1.96379e-05	0.104309	-0.000369733	-0.00245648	-0.0241826	0.032311	-0.123975	-0.0152607	-0.000105678	-0.00272209	-0.0260543	7.18609e-06	-1.85352e-05	-0.0240858	0.0026345	1.26166e-05	0.0057123	1.32713e-08	0.00246583	1.06727e-05	0.00175702	0.0018919	0.00111964	0.000253642
GATGAGGTCATTACGG.1	-0.00357766	-0.00130702	-0.0378745	-0.00168563	0.00192615	0.0029173	0.00107557	0.00510041	-0.00025651	0.0011721	-0.00132272	-0.00376346	-0.00117601	-0.000217725	-0.0037219	-0.0527114	0.00529672	1.44392e-05	0.000133252	0.00284994	-0.00310389	0.00577926	0.00207698	-0.0055642	0.00412745	0.000111282	0.0274026	-0.000324314	-0.00127989	-0.00767636	0.00805381	0.00615144	-0.0076955	-6.42692e-05	-0.00272234	-0.00368208	-1.26474e-06	-4.98872e-05	-0.00254923	0.00255555	2.582e-05	-0.00108529	8.14907e-09	0.00128212	-9.75747e-06	0.0018738	0.00041683	0.00118755	0.000265941
GATGATCTCTCCTGTG.1	-0.00475959	-0.00131538	-0.0913726	-0.00625742	0.00943391	0.00296851	0.00108771	0.00371091	-0.000265564	0.00116061	-0.00130779	-0.00375189	-0.00117553	0.00148854	-0.00380554	-0.0818651	0.00529513	1.47037e-05	0.000133453	0.00660841	-0.00323414	0.0058144	0.00217336	-0.00566958	0.00409872	4.34332e-05	0.0531834	-0.00032617	-0.00149122	-0.0105005	0.0123156	-0.0656319	-0.0070941	-6.72011e-05	-0.00272198	-0.00477439	-2.4233e-06	-3.77558e-05	-0.0131979	0.00266238	2.08691e-05	-0.000704851	8.14907e-09	0.0014809	-1.30036e-06	0.00184672	0.000492632	0.00118402	0.000265939
GATGCTACATTGACAC.1	-0.00895035	-0.00156797	-0.0776651	-0.0201536	0.0113251	0.00316468	0.00112277	-4.40897e-05	-0.000292057	0.00110074	-0.00131944	-0.00378552	-0.00117331	0.00681638	-0.00401397	-0.0622084	0.00528765	2.55592e-05	0.000133049	0.0231364	-0.00349297	0.00588017	0.00222602	-0.00578631	0.0040396	6.47083e-06	0.0444908	-0.000331497	-0.00231684	-0.0190809	0.0283197	-0.127548	-0.00802966	-7.46706e-05	-0.002722	-0.0120821	1.08322e-05	-1.74772e-05	-0.0328021	0.00279235	1.24034e-05	0.000542611	8.3819e-09	0.00230769	4.13507e-07	0.00184752	0.000781417	0.00118604	0.000265928
GATGGAGTCGAGAAAT.1	-0.0136186	5.86733e-06	-0.0666804	0.000954857	0.0112209	0.00292281	0.00111203	0.00749049	-0.000285975	0.00801276	-0.00138868	-0.00562936	-0.00117423	-0.006602	-0.00744162	-0.0359398	0.0052948	1.58846e-05	0.000134099	-0.0035633	-0.00445341	0.00588035	0.00224877	-0.00545262	0.00404806	8.03359e-05	0.0886496	-0.000353804	-0.00158315	-0.0132514	0.0141664	-0.14401	-0.00966733	-8.17045e-05	-0.00272223	-0.010039	5.06174e-06	-3.98271e-05	-0.0110432	0.00256103	1.49421e-05	0.00161526	8.44011e-09	0.00158519	-1.39698e-07	0.00184923	0.00047642	0.00110409	0.000265762
GCAACCGAGTAGTCCT.1	-0.0132976	7.62474e-06	-0.0927396	-0.00052782	0.00738535	0.00303628	0.0011491	0.00178961	-0.000292756	0.00286923	-0.00140922	-0.00488572	-0.00115372	-0.00748177	-0.00810001	-0.0648817	0.00526513	1.45957e-05	0.0001348	0.00640072	-0.00467615	0.00586745	0.00227485	-0.00551622	0.0040542	5.76749e-05	0.0708273	-0.000364183	-0.00191218	-0.014854	0.0165508	-0.114094	-0.0115683	-8.15624e-05	-0.00273209	-0.00653094	-7.72998e-07	-1.8714e-05	-0.012662	0.00256777	1.45845e-05	0.000800332	8.3819e-09	0.00191215	-1.56928e-07	0.00184836	0.00049074	0.00113102	0.000263095
GCAACCGGTCACTAGT.1	-0.0331622	0.0064963	-0.0107316	-0.0046814	0.0086445	0.00364777	0.00132722	-0.00152562	-0.000385368	0.00259369	-0.00105879	-0.00419485	-0.000963487	-0.0245695	-0.0167893	0.00626295	0.00499628	3.18196e-05	0.000136711	-0.00110941	-0.0129807	0.0061004	0.0033914	-0.00495903	0.00392932	9.44827e-06	0.0278218	-0.000423109	-0.00396785	-0.0343331	0.0487628	-0.0432168	-0.0301782	-0.000137841	-0.00272234	-0.0276268	0.00025256	8.82428e-07	-0.0173735	0.00269875	2.41771e-06	0.012286	4.00469e-08	0.00393265	0.000100652	0.00174433	0.00230926	0.000647848	0.000243012
GCACATAGTTCATCTT.1	-0.00336994	-0.00126111	-0.0308539	-0.00207319	-0.00146046	0.00290407	0.00107373	0.00536047	-0.000249223	0.00117372	-0.00132914	-0.00361152	-0.00117615	0.00108418	-0.00366629	-0.0325168	0.00529658	1.45026e-05	0.000133036	0.00325146	-0.00310058	0.00561818	0.00209893	-0.00557214	0.00413825	0.000120699	0.00667593	-0.000324352	-0.00106362	-0.00660478	0.00732745	0.0118924	-0.0072787	-6.40886e-05	-0.00257291	-0.00276369	-3.71598e-06	-5.10849e-05	0.0011729	0.00256026	2.79285e-05	-0.00107303	8.14907e-09	0.0010615	-1.27973e-05	0.00184862	0.000412628	0.00118853	0.000265963
GCACGTGAGAGCAACC.1	-0.00340758	-0.001264	-0.0389849	0.000329133	-0.000916852	0.00290669	0.00107565	0.00576964	-0.000248888	0.00117963	-0.00133257	-0.00366019	-0.00117615	-0.00103593	-0.00369618	-0.0227239	0.00529679	1.44504e-05	0.000133157	0.00234724	-0.00310142	0.00576905	0.00207906	-0.00556533	0.00413646	0.000132715	0.00406117	-0.000324374	-0.0010379	-0.00637659	0.00693159	0.0181501	-0.00714041	-6.40701e-05	-0.002722	-0.00283879	-2.68966e-06	-5.14686e-05	0.00167713	0.00255516	2.84128e-05	-0.0010536	8.14907e-09	0.00103963	-1.37696e-05	0.00185593	0.000411183	0.00118741	0.000265963
GCACGTGAGCCTCAAT.1	-0.00592654	-0.00162963	-0.0452437	-0.0162426	0.0137814	0.00323456	0.0012034	0.00410076	-0.000258024	0.0011538	-0.00135352	-0.00353733	-0.00117548	0.0114942	-0.00371519	-0.111217	0.00529447	1.45845e-05	0.000132976	0.0145696	-0.00332279	0.00581675	0.00220735	-0.00574236	0.00409051	1.18264e-05	0.0383201	-0.000325112	-0.00151959	-0.0101359	0.0149709	-0.0697059	-0.00743653	-6.58073e-05	-0.00272206	-0.00648192	8.27014e-07	-3.88119e-05	-0.0303833	0.00273045	1.68644e-05	-0.00134481	5.58794e-09	0.00150545	-2.16416e-06	0.00187559	0.000764519	0.0011878	0.000265943
GCACTAACAGAGTCTT.1	-0.0034049	-0.00125929	-0.0438807	0.000221185	-0.000682818	0.00290853	0.00107404	0.00549329	-0.000249929	0.00117424	-0.00133173	-0.00363987	-0.00117616	-0.0012177	-0.00368627	-0.0262351	0.00529674	1.45771e-05	0.000133215	0.00254568	-0.00311181	0.00577067	0.00207965	-0.00556722	0.00413573	0.00012883	0.0107558	-0.000324478	-0.00108665	-0.00664507	0.00721244	0.0169511	-0.00719178	-6.46705e-05	-0.00272198	-0.00290693	-3.21306e-06	-5.13308e-05	0.00160089	0.00255604	2.80216e-05	-0.00105052	8.14907e-09	0.00108534	-1.19405e-05	0.00185645	0.000411242	0.00118737	0.000265963
GCACTAACATTCATCT.1	-0.0140962	-0.00205511	-0.0464767	-0.0397542	0.00266379	0.00373358	0.00126546	0.00359504	-0.000297634	0.000968747	-0.00130073	-0.00338759	-0.00117553	0.020569	-0.00424582	-0.0587845	0.00527904	2.66526e-05	0.000132823	0.0517069	-0.00391957	0.00589562	0.00325017	-0.00608881	0.004031	-7.39582e-05	0.0112396	-0.000337949	-0.00344829	-0.024325	0.0395318	-0.165102	-0.00517942	-8.27509e-05	-0.00272333	-0.0268356	2.24198e-05	-1.03638e-05	-0.0635389	0.0031385	6.78375e-06	-0.00145903	-2.03494e-07	0.00336105	3.28315e-06	0.00187694	0.00203414	0.00119044	0.000265883
GCAGCTGAGGCACAAC.1	-0.00349324	-0.00131672	-0.0455248	-0.000741302	0.000382643	0.00296308	0.00106982	0.00546469	-0.00025304	0.00117296	-0.00132492	-0.00365553	-0.00117605	-0.00061837	-0.00370601	-0.0404122	0.0052966	1.44504e-05	0.000133295	0.00282665	-0.00311688	0.00577513	0.0020949	-0.00556828	0.00413147	0.000118306	0.015687	-0.000324359	-0.00113029	-0.00701881	0.00740817	0.00906274	-0.00749055	-6.44036e-05	-0.00272198	-0.00321083	-7.6741e-07	-5.01778e-05	-0.000312209	0.00255646	2.66284e-05	-0.00105699	8.14907e-09	0.0011283	-1.0916e-05	0.00185627	0.000413999	0.00118732	0.000265956
GCAGCTGCAAGTGGCA.1	-0.00349517	-0.00128255	-0.0414758	-0.00273477	0.00506773	0.00292783	0.0010899	0.00554281	-0.00024893	0.0011697	-0.00132682	-0.00355493	-0.0011761	0.000387449	-0.00368061	-0.0438989	0.00529548	1.46702e-05	0.000132985	0.00364767	-0.00313706	0.00578513	0.00208554	-0.00559644	0.00412193	7.20769e-05	0.0359187	-0.00032456	-0.00111831	-0.00788472	0.0100492	-0.030842	-0.00586685	-6.43506e-05	-0.00272233	-0.00425085	4.30085e-06	-4.7382e-05	-0.00750086	0.00258319	2.3935e-05	-0.00110993	8.14907e-09	0.0011064	-9.55979e-06	0.00184506	0.000503033	0.00118758	0.000265686
GCAGTTATCAACCCGG.1	-0.00487529	-0.0015344	-0.0370986	-0.0094533	0.00843803	0.00317163	0.00118778	0.00487236	-0.000251415	0.00116327	-0.00129261	-0.00354	-0.00117608	0.00609179	-0.00368839	-0.0725714	0.00529616	1.451e-05	0.00013303	0.00762318	-0.00324587	0.00581072	0.00228972	-0.00561599	0.00409719	2.60063e-05	0.0374474	-0.00032535	-0.00121881	-0.00876378	0.013354	-0.0442223	-0.00579448	-6.54788e-05	-0.002722	-0.0055666	4.13507e-07	-4.52418e-05	-0.0179258	0.00260393	1.9582e-05	-0.00115109	8.09086e-09	0.00120353	-7.16909e-06	0.00185331	0.000643656	0.00118681	0.00026577
GCATCGGAGAAGTCTA.1	-0.00440169	-0.00134886	-0.0421823	-0.00714778	0.0114936	0.0029669	0.0010966	0.00276254	-0.000255883	0.00116496	-0.0013381	-0.00361733	-0.0011758	0.00354374	-0.00369518	-0.0759556	0.00529537	1.45771e-05	0.000132948	0.00709528	-0.00317189	0.00578777	0.00209339	-0.00569798	0.00411904	4.25056e-05	0.0450576	-0.000324739	-0.00136481	-0.00919051	0.0127694	-0.0510776	-0.0071239	-6.51374e-05	-0.002722	-0.00546259	-2.65986e-06	-4.38169e-05	-0.01712	0.00268538	2.12155e-05	-0.00115163	7.68341e-09	0.00134725	-2.11457e-06	0.00185377	0.000575081	0.00118721	0.000265962
GCATCTCCAATCCTTT.1	-0.00987328	-0.00161585	-0.0674698	-0.00325818	0.0156786	0.00328853	0.00111666	0.00225328	-0.000297056	0.00115003	-0.000966187	-0.00390822	-0.00115464	-0.00964174	-0.00448263	-0.0262003	0.00524168	3.46105e-05	0.000132628	-0.00132846	-0.00351515	0.00590515	0.00374634	-0.00545692	0.00404126	3.24082e-05	0.0763662	-0.000333024	-0.00222677	-0.0188183	0.02191	-0.0871263	-0.0113012	-8.45366e-05	-0.00272495	-0.0147791	5.29177e-06	-3.17693e-05	-0.0116352	0.00261985	1.35489e-05	0.00282988	1.60653e-08	0.00220902	1.25729e-08	0.00182652	0.000680685	0.0011525	0.000255864
GCATCTCCAATTCACG.1	-0.00417482	-0.00128218	-0.0471202	-0.00796561	0.007224	0.00291138	0.0010943	0.00254738	-0.00025261	0.00116455	-0.00134421	-0.00363943	-0.00117609	0.00487852	-0.00369961	-0.0722694	0.00529576	1.527e-05	0.000132943	0.00673275	-0.00316295	0.00578442	0.00209857	-0.00562216	0.00412242	5.03846e-05	0.0471296	-0.000324627	-0.00127032	-0.00870059	0.0123428	-0.0544218	-0.00614257	-6.50285e-05	-0.002722	-0.00494653	-2.00421e-06	-4.55119e-05	-0.0127167	0.00260948	2.13832e-05	-0.00108694	7.68341e-09	0.001253	-3.97721e-06	0.00185465	0.000482187	0.0011874	0.000265963
GCATCTCCACAGAGAC.1	-0.0036029	-0.00126142	-0.0422699	-0.000916238	0.00324441	0.0029137	0.00107741	0.00481642	-0.000249203	0.00117156	-0.00133415	-0.00361427	-0.00117617	-0.000677642	-0.00366589	-0.0323086	0.00529659	1.4443e-05	0.000133021	0.0028979	-0.00311836	0.00576945	0.00209477	-0.00558776	0.00413597	8.57227e-05	0.0296084	-0.000324322	-0.00107355	-0.00720897	0.00875276	-0.00203437	-0.00639783	-6.41904e-05	-0.002722	-0.00404726	-3.04542e-06	-5.03566e-05	-0.00423715	0.00257456	2.60957e-05	-0.00109057	8.14907e-09	0.00106666	-1.04355e-05	0.0018502	0.000472412	0.0011876	0.000265963
GCATCTCCAGAGGAAA.1	-0.00416935	-0.00130614	-0.031478	-0.0108981	0.0058096	0.00296981	0.00110604	0.00573408	-0.000251202	0.00116265	-0.00134208	-0.00360372	-0.00117613	0.0076591	-0.00372048	-0.0553826	0.00529608	1.52364e-05	0.000132965	0.00724219	-0.00319646	0.00579621	0.00215175	-0.00560813	0.00411228	4.02741e-05	0.0442499	-0.000325291	-0.00121967	-0.00879521	0.0124644	-0.0573037	-0.00553178	-6.5361e-05	-0.00272203	-0.00568637	2.32272e-06	-4.76837e-05	-0.0137218	0.00259513	1.98595e-05	-0.001095	8.09086e-09	0.00120363	-6.91088e-06	0.0018504	0.000586167	0.00118754	0.000265945
GCATCTCGTGACAGCA.1	-0.00341776	-0.0012956	-0.0435995	-0.000322902	-0.000221783	0.0029398	0.00107064	0.00550556	-0.000251981	0.00117361	-0.00132985	-0.00365391	-0.00117611	-0.0008779	-0.00369482	-0.0329581	0.0052967	1.44467e-05	0.000133295	0.00257397	-0.00310787	0.00577229	0.0020801	-0.0055678	0.00413413	0.000126081	0.0136071	-0.000324337	-0.00111377	-0.00686354	0.0072474	0.0138484	-0.00741647	-6.44215e-05	-0.002722	-0.00304939	-9.9279e-07	-5.06695e-05	0.000625134	0.00255553	2.72319e-05	-0.00105881	8.14907e-09	0.00111179	-1.15493e-05	0.00185631	0.000411466	0.00118736	0.000265963
GCATCTCTCGTGTGAT.1	-0.0171819	0.000447752	-0.0809292	6.24568e-05	0.0212552	0.00297924	0.00115233	0.00344177	-0.000296671	0.00193028	-0.00137081	-0.00462303	-0.00113407	-0.012565	-0.00655563	-0.030701	0.00524702	1.69165e-05	0.000134723	-0.000518236	-0.0051526	0.00588729	0.00222979	-0.00544019	0.00403692	4.66648e-05	0.0991498	-0.000370061	-0.00210322	-0.0190639	0.0200272	-0.147987	-0.0121298	-8.65994e-05	-0.00272218	-0.013635	4.5523e-06	-1.97627e-05	-0.0209771	0.00258041	1.31279e-05	0.00313719	9.1386e-09	0.00212008	4.25382e-07	0.00183931	0.000746042	0.00092338	0.00026333
GCATGATTCTCCTGAC.1	-0.0196879	0.000492997	-0.0437805	-0.000229487	0.0156925	0.00292998	0.00113246	0.00767478	-0.000293063	0.00705758	-0.00141288	-0.00572913	-0.00117375	-0.00738988	-0.0100531	-0.0361769	0.0052932	1.77808e-05	0.000134159	-0.00443435	-0.00498743	0.00589391	0.00236602	-0.0054131	0.00403697	6.30189e-05	0.092626	-0.000376618	-0.00173189	-0.0153115	0.0167214	-0.176152	-0.00936014	-8.79965e-05	-0.00272315	-0.0122257	5.85621e-06	-3.47178e-05	-0.0147781	0.00256992	1.28634e-05	0.00209449	8.78936e-09	0.00174548	2.52621e-08	0.00185173	0.000563473	0.000992849	0.000265248
GCCAACGCACTGTCGG.1	-0.00869191	-0.00119	-0.00953818	-0.0060934	0.0182066	0.00308505	0.00134673	0.00564732	-0.000259534	0.00113534	-0.00131988	-0.00346941	-0.00117591	-0.00164793	-0.00376672	-0.108486	0.00529096	1.56052e-05	0.000132905	0.0162576	-0.003682	0.005843	0.00239197	-0.00576875	0.00406791	6.63567e-06	0.0716622	-0.000326445	-0.0015926	-0.0129169	0.0193199	-0.113388	-0.00252139	-6.77461e-05	-0.00272255	-0.0124592	4.43123e-06	-2.96906e-05	-0.0327884	0.00276254	1.27358e-05	-0.00131983	-2.32831e-09	0.00158484	-1.88174e-06	0.00184995	0.00076358	0.00118653	0.000265932
GCCAACGGTACTGACT.1	-0.00343012	-0.00127321	-0.0469426	5.64279e-05	-6.21453e-05	0.00291623	0.00107042	0.00524591	-0.000251518	0.00117244	-0.00132506	-0.00364991	-0.00117614	-0.00130284	-0.00367836	-0.0379139	0.00529669	1.49161e-05	0.000133013	0.0031324	-0.00310771	0.00577376	0.00211848	-0.00557752	0.00413033	0.000116574	0.0159838	-0.000324553	-0.00111575	-0.0068957	0.00759013	0.00147778	-0.00748803	-6.45582e-05	-0.00271868	-0.00299731	-3.57628e-06	-5.08409e-05	0.000169903	0.00256692	2.71611e-05	-0.00106021	8.14907e-09	0.00111358	-1.03088e-05	0.00185088	0.000413075	0.00118758	0.000265963
GCCAACGTCTACCACC.1	-0.00331224	-0.00126616	-0.0294593	-0.000933971	-0.00111908	0.0029035	0.00107843	0.00565374	-0.000248224	0.00117426	-0.0013308	-0.00359865	-0.00117608	0.000179596	-0.00366485	-0.0252258	0.00529667	1.45547e-05	0.000133064	0.0028277	-0.00310291	0.00576274	0.00208019	-0.00556885	0.00413875	0.000127802	0.00261111	-0.000324344	-0.00103952	-0.00635896	0.00700148	0.0181209	-0.00709663	-6.39872e-05	-0.00271809	-0.00277692	-3.80911e-06	-5.15189e-05	0.00149038	0.00255719	2.85134e-05	-0.00108152	8.14907e-09	0.00103833	-1.34418e-05	0.00185598	0.000412017	0.00118807	0.000265963
GCCAGCAGTTTACGTG.1	-0.00336019	-0.00125088	-0.0354061	0.000136546	-0.000564551	0.00290469	0.0010684	0.00546202	-0.000251668	0.00117386	-0.00132922	-0.00364425	-0.00117615	-0.00152871	-0.00367753	-0.0221312	0.00529661	1.47186e-05	0.000132987	0.00255151	-0.00310903	0.00577003	0.00208402	-0.00558005	0.00413627	0.000128271	0.0299275	-0.000324955	-0.00110359	-0.00703268	0.0076463	0.0123426	-0.00703018	-6.49814e-05	-0.00272198	-0.00298321	-3.90597e-06	-4.99487e-05	0.00058192	0.00256829	2.78726e-05	-0.00107377	8.14907e-09	0.00110244	-1.08304e-05	0.0018517	0.000417098	0.00118768	0.000265924
GCCAGGTTCCGAGGCT.1	-0.00337851	-0.00123102	-0.040413	-0.000587311	0.00218102	0.00290818	0.00107354	0.00564963	-0.000248985	0.00117251	-0.00133444	-0.00362943	-0.00117617	-0.000682395	-0.00367566	-0.0227465	0.00529672	1.45175e-05	0.000133038	0.00283485	-0.00313231	0.00576875	0.00208956	-0.00557595	0.0041363	0.00010474	0.0219005	-0.000324367	-0.0010616	-0.00690261	0.0075398	0.00522441	-0.00655593	-6.39993e-05	-0.00272203	-0.00366411	-3.8147e-06	-4.95967e-05	-0.00283682	0.00256306	2.72095e-05	-0.00108672	8.14907e-09	0.0010562	-1.24918e-05	0.00185147	0.000450134	0.00118759	0.000265963
GCCAGTGAGGCATTTC.1	-0.00475223	-0.00105202	-0.0691469	0.000979745	0.000162653	0.00290543	0.00109858	0.00519301	-0.000260144	0.00119838	-0.00133966	-0.00370574	-0.00117558	-0.0029649	-0.003825	-0.0300391	0.00529422	1.46739e-05	0.000133812	0.00256154	-0.00332493	0.00579041	0.00208517	-0.0055449	0.00411737	0.00012601	0.0384558	-0.000327623	-0.00119047	-0.00767131	0.00803011	0.00978935	-0.00670066	-6.56786e-05	-0.00272198	-0.00421703	-1.90735e-06	-4.7626e-05	7.39694e-05	0.00255672	2.70903e-05	-0.000911787	8.14907e-09	0.00119224	-9.88669e-06	0.00185718	0.000439629	0.00115707	0.000265315
GCCAGTGGTAACATGA.1	-0.00531	-0.00132391	-0.0633549	-0.0149169	0.0152233	0.00294131	0.00109616	0.00365098	-0.000263358	0.00115852	-0.00133601	-0.00365523	-0.00117457	0.00962138	-0.00373413	-0.0817516	0.00529349	1.45882e-05	0.000133045	0.00758417	-0.00320964	0.0058042	0.00211507	-0.00573394	0.00410338	2.81092e-05	0.0593255	-0.000324948	-0.00153225	-0.0109143	0.0137823	-0.0789006	-0.00724784	-6.56348e-05	-0.002722	-0.0058164	-1.24425e-06	-3.85009e-05	-0.0222075	0.00272281	1.91703e-05	-0.000978757	8.09086e-09	0.00151242	-5.12693e-07	0.00184964	0.000553012	0.00118709	0.000265962
GCCAGTGGTAATTAGG.1	-0.0172888	0.00144874	-0.0771157	-0.000704918	0.0198214	0.00299722	0.0011653	0.00374254	-0.00029705	0.00188424	-0.00140245	-0.00440095	-0.00105803	-0.012823	-0.00630773	-0.0303051	0.00516018	2.16663e-05	0.000134295	-0.00242431	-0.00622465	0.00589634	0.00223878	-0.00543539	0.00403346	3.91882e-05	0.0943015	-0.000363519	-0.00210127	-0.0198402	0.0210664	-0.143324	-0.0132853	-8.82423e-05	-0.00272201	-0.0163685	3.09758e-06	-2.38027e-05	-0.014034	0.00259636	1.3452e-05	0.0042168	1.07393e-08	0.0021089	1.85613e-06	0.00179551	0.00111577	0.000952564	0.000260249
GCCAGTGGTGAATGTA.1	-0.0183517	0.000377731	-0.05104	-2.05929e-05	0.016794	0.00291465	0.00113444	0.00728822	-0.000293896	0.00772004	-0.00141713	-0.00628657	-0.00117301	-0.00683617	-0.00761556	-0.0358496	0.00529332	1.58511e-05	0.000134647	-0.004584	-0.00483303	0.00589593	0.00229587	-0.00543766	0.00403996	6.81691e-05	0.0980725	-0.000377549	-0.00166406	-0.0151137	0.0159453	-0.15669	-0.00961165	-9.01218e-05	-0.00272269	-0.0107794	5.97345e-06	-3.57721e-05	-0.0164439	0.00256313	1.35358e-05	0.00201227	8.49832e-09	0.00167061	2.1304e-08	0.00184772	0.000540376	0.00104298	0.000265755
GCCATTCCATGACAGG.1	-0.00353383	-0.00123439	-0.0837176	-0.000610352	0.00152995	0.00293402	0.00106567	0.00419698	-0.000260012	0.00116989	-0.00130401	-0.00383358	-0.00117589	-0.00208163	-0.00370822	-0.0557198	0.00529628	1.50874e-05	0.00013306	0.0030433	-0.00314258	0.00578532	0.00215083	-0.0055957	0.00411843	0.00010822	0.042061	-0.000325544	-0.00124169	-0.00852599	0.00918292	-0.0156272	-0.00749854	-6.64185e-05	-0.00271403	-0.00346151	-3.46825e-06	-4.29824e-05	-0.00145617	0.00259112	2.56337e-05	-0.000898901	8.14907e-09	0.00123868	-6.34859e-06	0.00182343	0.000418991	0.00118691	0.000265962
GCCCAGAAGAATCGCG.1	-0.00347194	-0.00122158	-0.039711	-0.00063553	0.00341343	0.00291054	0.0010764	0.00544257	-0.000248774	0.00117131	-0.00133517	-0.00361994	-0.00117617	-0.000841854	-0.00366987	-0.0267538	0.00529661	1.44653e-05	0.000133034	0.00312755	-0.00314975	0.00576925	0.00208074	-0.00557709	0.00413586	9.63062e-05	0.0245013	-0.000324292	-0.00106865	-0.00709798	0.00807283	-0.00322157	-0.00632394	-6.39808e-05	-0.002722	-0.00419204	-3.3509e-06	-4.90732e-05	-0.00461826	0.002564	2.63266e-05	-0.00109329	8.14907e-09	0.00106253	-1.216e-05	0.00184863	0.000476852	0.00118761	0.000265948
GCCCGAATCAACTGGT.1	-0.00345008	-0.00122958	-0.0433882	-0.0032007	0.00271665	0.00290908	0.00107668	0.0053006	-0.00024914	0.00117136	-0.00133442	-0.00364965	-0.00117617	0.00160943	-0.0036785	-0.0272671	0.0052965	1.46739e-05	0.000133045	0.00378381	-0.00314514	0.00577212	0.00208279	-0.00557716	0.00413289	7.95666e-05	0.024097	-0.000324322	-0.00107199	-0.00723994	0.00825237	-0.0110646	-0.00617265	-6.40019e-05	-0.00272203	-0.00407183	-3.30806e-06	-4.88013e-05	-0.0046308	0.0025641	2.61851e-05	-0.00108844	8.14907e-09	0.00106481	-1.18248e-05	0.00185399	0.000489116	0.00118756	0.000265941
GCCGATGAGTAAGCAT.1	-0.00783903	-0.000972175	-0.102296	0.000889061	0.00663375	0.00292238	0.00110288	0.00309987	-0.000282041	0.00181226	-0.00133222	-0.00467023	-0.00113567	-0.00482932	-0.00557458	-0.0473546	0.00525197	1.44467e-05	0.000134222	0.00337542	-0.00347123	0.00581388	0.00254599	-0.00550315	0.00409919	0.00010323	0.0778017	-0.000341399	-0.00142548	-0.0105846	0.0123027	-0.0876152	-0.00827658	-6.99838e-05	-0.0027235	-0.00731269	-1.86451e-06	-4.32935e-05	-0.00815448	0.00255714	1.95131e-05	-0.000243835	8.14907e-09	0.00142531	-5.96046e-06	0.00185455	0.000439018	0.00115155	0.000264354
GCCGTGAGTACCGGCT.1	-0.00357348	-0.00126403	-0.0412037	-0.00174496	0.00453708	0.00291286	0.00108482	0.00563498	-0.000248684	0.00117001	-0.00132426	-0.00357225	-0.00117615	-0.000299077	-0.00367267	-0.039213	0.00529587	1.44541e-05	0.000133008	0.0036486	-0.0031246	0.00577716	0.00207956	-0.00558583	0.00412931	7.8328e-05	0.0330727	-0.000324419	-0.00110212	-0.00760608	0.00915422	-0.023337	-0.00587901	-6.42351e-05	-0.0027221	-0.00445473	3.48501e-06	-4.82611e-05	-0.00651607	0.00257265	2.44491e-05	-0.00110208	8.14907e-09	0.00109242	-1.04427e-05	0.00184497	0.000496045	0.0011876	0.000265801
GCCGTGATCCTCACGT.1	-0.00415535	-0.0012098	-0.063666	-0.00135574	0.00326878	0.00295492	0.00107498	0.00491794	-0.000259039	0.00117053	-0.00130853	-0.0036818	-0.00117443	-0.000850994	-0.00380784	-0.057606	0.00529456	1.44504e-05	0.000133798	0.00341214	-0.00324332	0.00579295	0.00219204	-0.00556892	0.00411544	9.77591e-05	0.0320583	-0.000324717	-0.00123642	-0.00787836	0.00846693	0.00804389	-0.00723993	-6.48807e-05	-0.00272163	-0.00455096	1.08033e-06	-4.92092e-05	-0.00398475	0.0025638	2.48328e-05	-0.000963382	8.14907e-09	0.00123658	-7.25361e-06	0.00185522	0.000448436	0.00118425	0.000265792
GCCGTGATCGCTCATC.1	-0.00693212	-0.00140173	-0.0937906	-0.0309506	0.0203384	0.00300083	0.0010944	0.00194537	-0.000275356	0.00113953	-0.00132536	-0.00362807	-0.00117536	0.0234119	-0.00380597	-0.0854104	0.00529291	1.51098e-05	0.000133041	0.0106325	-0.00331893	0.0058439	0.00224938	-0.0058796	0.00407065	8.08248e-06	0.0508715	-0.000329321	-0.00184024	-0.0131272	0.0195026	-0.124696	-0.00668937	-6.96102e-05	-0.00272201	-0.00672469	3.11993e-06	-3.34699e-05	-0.0314709	0.00286701	1.59238e-05	-0.000411838	8.03266e-09	0.00182407	-1.86265e-09	0.00184672	0.00060375	0.00118706	0.000265954
GCCTGTTAGAGCCGTA.1	-0.00427784	-0.00122511	-0.0828016	-0.000490197	0.00362776	0.00295595	0.00108366	0.00393508	-0.000265778	0.00117219	-0.0012821	-0.0038474	-0.00117369	-0.00329675	-0.00379639	-0.0426393	0.00529419	1.77994e-05	0.000133066	0.00355492	-0.00320062	0.00579564	0.00215691	-0.00558849	0.00411439	9.8139e-05	0.0579536	-0.000325864	-0.00133733	-0.00962121	0.00970569	-0.0264056	-0.00714646	-6.72156e-05	-0.00272198	-0.00473136	2.55182e-07	-3.78918e-05	-0.00329566	0.00258706	2.39238e-05	-0.000569846	8.3819e-09	0.00133526	-4.87315e-06	0.00182383	0.00043714	0.00118676	0.000265921
GCGAGAAGTTCCAGGC.1	-0.00387815	-0.00127568	-0.0581162	-0.00497659	0.00544032	0.00290574	0.00108542	0.00267659	-0.0002547	0.00116713	-0.00133679	-0.00368535	-0.001176	0.001962	-0.00368247	-0.0662183	0.00529563	1.47298e-05	0.000132965	0.00497082	-0.00313795	0.00578107	0.00208508	-0.0056337	0.0041254	6.2719e-05	0.0481193	-0.000324545	-0.0012436	-0.00868545	0.0113006	-0.0348965	-0.00662764	-6.4793e-05	-0.00272201	-0.0039424	-1.13621e-06	-4.40627e-05	-0.0084815	0.002621	2.32086e-05	-0.00104708	8.11997e-09	0.0012293	-3.00328e-06	0.00185001	0.000446022	0.00118755	0.000265963
GCGATCGAGCTCGGCT.1	-0.00366893	-0.00143849	-0.0480527	-0.00445622	0.00678679	0.00307052	0.00109272	0.00493435	-0.000250073	0.00116942	-0.00130187	-0.00360859	-0.00117604	0.00212489	-0.00367381	-0.0608556	0.00529647	1.4469e-05	0.000133006	0.00362438	-0.00315145	0.00578863	0.00212598	-0.00559212	0.00411838	6.27209e-05	0.0329838	-0.000324754	-0.0011412	-0.00790938	0.0107505	-0.0256032	-0.00614302	-6.45654e-05	-0.002722	-0.00392777	2.49781e-06	-4.79557e-05	-0.0103415	0.00257889	2.36109e-05	-0.00112526	8.14907e-09	0.00113111	-9.3549e-06	0.00185589	0.000498533	0.00118753	0.000265837
GCGGAAACAACCTATG.1	-0.0129045	0.000132065	-0.0970325	-0.000930284	0.0103834	0.00299482	0.00116577	0.00235122	-0.000292523	0.00242037	-0.001434	-0.004763	-0.00114127	-0.00881573	-0.00707736	-0.060453	0.00525737	1.53109e-05	0.000134289	0.00532403	-0.00481334	0.00587165	0.00220803	-0.00552261	0.00405244	5.54658e-05	0.0769131	-0.000367081	-0.00205543	-0.0164515	0.0165005	-0.121667	-0.0114713	-8.1619e-05	-0.00273273	-0.00613707	1.13808e-06	-1.80509e-05	-0.0143294	0.00257349	1.46721e-05	0.00107479	8.84756e-09	0.00205717	6.28643e-09	0.00184953	0.000499316	0.00108341	0.000264568
GCGGATCCAGAAGCGT.1	-0.0106445	0.000103232	-0.0994629	-0.000460671	0.0127913	0.00295353	0.00118787	0.00273534	-0.000287583	0.00153841	-0.0014447	-0.00447047	-0.00112319	-0.00953476	-0.00577196	-0.0620445	0.00524267	1.54972e-05	0.000133859	0.00351621	-0.00478149	0.00585697	0.00223946	-0.00554754	0.00405894	5.98859e-05	0.0896874	-0.000365106	-0.0020274	-0.0163831	0.0157744	-0.11004	-0.0112136	-7.96205e-05	-0.00272589	-0.00608966	5.7742e-08	-2.2471e-05	-0.0161608	0.00258851	1.54469e-05	0.000661606	8.61473e-09	0.00202739	8.84756e-09	0.00184708	0.000490673	0.00105536	0.000265544
GCGGATCGTCTTCGAA.1	-0.00533424	-0.00129578	-0.0511252	-0.00932028	0.0102488	0.00297064	0.00110746	0.00259594	-0.000261154	0.00115656	-0.00132394	-0.00367951	-0.00117595	0.00432588	-0.00377814	-0.0841785	0.00529455	1.49123e-05	0.000133114	0.0129751	-0.00327047	0.00581324	0.00220978	-0.00564609	0.00409518	2.66526e-05	0.062305	-0.000325521	-0.00151178	-0.010637	0.0141496	-0.0649241	-0.00612079	-6.67454e-05	-0.00272203	-0.00609243	9.31323e-09	-3.48706e-05	-0.0215564	0.0026399	1.89506e-05	-0.00105514	8.03266e-09	0.00149788	-1.5907e-06	0.00185072	0.000582233	0.00118755	0.00026596
GCGTGCAAGGTTCACT.1	-0.00789896	-0.000576054	-0.0931179	0.000690464	0.00980875	0.00293867	0.0011096	0.00423538	-0.000276999	0.00173805	-0.00129226	-0.00443716	-0.00117315	-0.00639972	-0.00481972	-0.0410603	0.00529047	1.51098e-05	0.00013439	0.000239292	-0.00390122	0.005847	0.00226069	-0.0054967	0.00407066	8.26288e-05	0.0816756	-0.000333218	-0.00150506	-0.0121178	0.0123482	-0.0609322	-0.00906926	-7.17021e-05	-0.00272282	-0.00829682	5.68386e-06	-4.58844e-05	-0.00818154	0.00257218	1.96453e-05	0.000450186	8.61473e-09	0.00150523	-1.2333e-06	0.00182078	0.0004839	0.00113557	0.000264835
GCGTGCAGTGATCATC.1	-0.00552461	-0.00131527	-0.0842121	-0.0158433	0.0138348	0.00294046	0.00108678	0.0045474	-0.000267233	0.00115636	-0.00133271	-0.00376561	-0.0011757	0.00949947	-0.00377175	-0.0742399	0.00529441	1.47857e-05	0.000133276	0.005964	-0.00322162	0.00581769	0.00217059	-0.00575319	0.00409141	2.4952e-05	0.0726415	-0.000325112	-0.0017054	-0.0120861	0.0145577	-0.0836529	-0.00658995	-6.66501e-05	-0.002722	-0.00578639	-9.85339e-07	-3.56194e-05	-0.0195343	0.00274481	1.87755e-05	-0.000624109	8.14907e-09	0.00168629	-7.70669e-08	0.00184876	0.000538602	0.00118743	0.00026596
GCGTGCATCGACACTA.1	-0.00330491	-0.00126364	-0.0274822	-0.00203325	-0.00137807	0.00290366	0.00107541	0.00559684	-0.000248313	0.00117428	-0.00132943	-0.00359251	-0.00117611	0.00124269	-0.00366412	-0.0263008	0.00529665	1.44988e-05	0.000133066	0.002889	-0.00309733	0.00574339	0.0020806	-0.00557055	0.00413972	0.000127027	0.00214248	-0.000324307	-0.00103645	-0.00639046	0.00705919	0.0193245	-0.0070745	-6.39675e-05	-0.00269978	-0.00277187	-3.82029e-06	-5.13773e-05	0.00163066	0.00255775	2.85245e-05	-0.00107898	8.14907e-09	0.00103459	-1.34977e-05	0.00185318	0.000412375	0.00118846	0.000265963
GCGTGCATCTAATTCC.1	-0.00510516	-0.00132008	-0.054005	-0.0103226	0.0121627	0.00295531	0.00111132	0.00364761	-0.000259487	0.00115886	-0.00133394	-0.00362387	-0.00117545	0.00547603	-0.00374057	-0.0897494	0.00529431	1.4592e-05	0.000133121	0.0111116	-0.0032329	0.00580223	0.00213539	-0.00569612	0.00410641	3.00091e-05	0.0540105	-0.000325022	-0.00148124	-0.0104285	0.0133479	-0.064545	-0.00677075	-6.58104e-05	-0.00272207	-0.00560591	-1.29081e-06	-3.71709e-05	-0.0217595	0.00268537	1.96863e-05	-0.00111941	7.97445e-09	0.00146325	-1.04052e-06	0.00184843	0.000595838	0.00118712	0.000265962
GCGTGCATCTAGCCAA.1	-0.00387024	-0.00128321	-0.0468064	-0.00475675	0.00680303	0.00291052	0.00109279	0.00254233	-0.000254073	0.00116744	-0.00133802	-0.00363844	-0.0011759	0.0018654	-0.00368339	-0.0757046	0.00529559	1.46814e-05	0.000132965	0.00554012	-0.00314894	0.00578135	0.00208217	-0.00564441	0.00412507	6.10892e-05	0.0412805	-0.000324531	-0.00124093	-0.00850945	0.0115765	-0.0361787	-0.00704175	-6.48514e-05	-0.002722	-0.00415844	-2.62819e-06	-4.47147e-05	-0.0106576	0.00263156	2.27801e-05	-0.00109749	8.03266e-09	0.00122609	-3.20631e-06	0.00185164	0.000465289	0.00118753	0.000265963
GCTACAAGTCCACTCT.1	-0.00417241	-0.00132676	-0.0718889	-0.0053947	0.00591567	0.00295477	0.00108963	0.00419387	-0.00026321	0.0011645	-0.00132701	-0.00366863	-0.00117568	0.0016092	-0.0037246	-0.0786357	0.00529536	1.46888e-05	0.000133177	0.00741603	-0.00318637	0.0057984	0.00214314	-0.00566852	0.00411092	4.69126e-05	0.041291	-0.000325052	-0.00141129	-0.00943522	0.0114283	-0.0467154	-0.00674719	-6.57662e-05	-0.00272198	-0.00457591	-2.16067e-06	-4.16916e-05	-0.0115983	0.00265773	2.19662e-05	-0.00105381	8.11997e-09	0.00139787	-3.00119e-06	0.00185176	0.000487134	0.00118572	0.000265963
GCTACCTAGCCTGCCA.1	-0.00431164	-0.00130039	-0.0563536	-0.0106108	0.0111908	0.00292503	0.00111301	0.00208671	-0.000256173	0.00116309	-0.00134348	-0.00360403	-0.00117514	0.00705659	-0.00372256	-0.0921474	0.00529477	1.54749e-05	0.000132941	0.00710836	-0.00320737	0.00579046	0.00209066	-0.00564863	0.00411769	3.87635e-05	0.0441387	-0.000324799	-0.00133672	-0.00911194	0.0132619	-0.0623596	-0.00647482	-6.5483e-05	-0.002722	-0.00481799	-7.86036e-07	-4.18089e-05	-0.0176534	0.00263581	2.08057e-05	-0.00108263	7.33417e-09	0.00131948	-2.82051e-06	0.00185429	0.000485077	0.00118718	0.000265963
GCTACCTAGCTCATAC.1	-0.00338178	-0.00126688	-0.0427783	-1.45128e-05	-0.000376534	0.002908	0.00107165	0.00528685	-0.000250612	0.00117278	-0.00132847	-0.00363998	-0.00117616	-0.00114089	-0.00367274	-0.0334194	0.00529671	1.50464e-05	0.000132998	0.00302375	-0.00310327	0.00576747	0.00210069	-0.00557676	0.00413264	0.000121132	0.0152764	-0.000324486	-0.00110101	-0.00679699	0.00747471	0.00575796	-0.0073926	-6.44544e-05	-0.00271476	-0.00286146	-3.7495e-06	-5.11426e-05	0.000561684	0.00256564	2.75634e-05	-0.00106488	8.14907e-09	0.00109856	-1.09496e-05	0.0018516	0.000411943	0.00118759	0.000265963
GCTACCTCACGTAACT.1	-0.00337745	-0.00126759	-0.0349583	-1.93948e-05	-0.000778066	0.0029057	0.00107856	0.00564275	-0.000248455	0.00117395	-0.00133058	-0.0035933	-0.00117615	-0.000776084	-0.00367413	-0.0286271	0.00529672	1.46739e-05	0.000133131	0.00294908	-0.00311675	0.00576912	0.00208105	-0.00556976	0.00413701	0.000122007	0.000950364	-0.000324426	-0.00106183	-0.00639271	0.00714883	0.0158117	-0.00715318	-6.44796e-05	-0.00272195	-0.00283687	-3.80166e-06	-5.145e-05	0.00138226	0.00255832	2.82489e-05	-0.00107183	8.14907e-09	0.00106045	-1.31696e-05	0.00185712	0.00041312	0.00118866	0.000265962
GCTCAAAGTTACACAC.1	-0.00326853	-0.0012675	-0.0272897	3.3366e-05	-0.00133856	0.00290473	0.00107574	0.00592291	-0.000247723	0.00117454	-0.00133134	-0.00357462	-0.00117602	-0.000640817	-0.00366319	-0.0208382	0.00529669	1.4592e-05	0.000133079	0.00266532	-0.00309643	0.00576463	0.00208139	-0.00556979	0.00414042	0.000130491	-0.00077497	-0.000324277	-0.00100263	-0.00618982	0.00677689	0.0206614	-0.00708489	-6.38445e-05	-0.002722	-0.00277166	-3.97488e-06	-5.16698e-05	0.00188643	0.00255672	2.87965e-05	-0.00108678	8.14907e-09	0.00100188	-1.44104e-05	0.00185702	0.000413314	0.00118843	0.000265963
GCTGCAGAGCCAGTAG.1	-0.0115838	4.28986e-05	-0.0984813	0.000217127	0.0164361	0.00297096	0.00117314	0.00260692	-0.000290711	0.00153437	-0.00142906	-0.00448243	-0.00114083	-0.0107629	-0.00527358	-0.0506077	0.00525755	1.64732e-05	0.000133989	0.00132561	-0.00474893	0.00586962	0.00221879	-0.0055324	0.00404855	5.83325e-05	0.0935616	-0.000362104	-0.00199257	-0.0169607	0.0172544	-0.125556	-0.0110929	-8.09192e-05	-0.00272336	-0.00827366	1.66707e-06	-2.56542e-05	-0.0161886	0.00258234	1.51806e-05	0.00182211	8.87667e-09	0.0019943	1.95578e-08	0.00183769	0.000599593	0.00105197	0.000264646
GCTGCAGCATACCACA.1	-0.0104257	-0.000544249	-0.0904064	0.00110933	0.00895473	0.00293569	0.00112116	0.00347474	-0.000281472	0.00198181	-0.00128844	-0.00470509	-0.00115275	-0.00658833	-0.00608523	-0.0483761	0.00526904	1.44728e-05	0.000134999	0.00197211	-0.0039376	0.00584226	0.00256985	-0.00545043	0.00407222	9.04668e-05	0.0849521	-0.00034838	-0.00153415	-0.0121554	0.0131582	-0.0895103	-0.00873406	-7.46601e-05	-0.00272231	-0.00782949	5.4203e-07	-4.20772e-05	-0.0100004	0.00255947	1.74455e-05	0.00036297	8.17818e-09	0.00153414	-2.19978e-06	0.00184512	0.000443637	0.0011305	0.00026427
GCTGCAGGTTTCACTT.1	-0.0111649	5.11785e-05	-0.10186	0.000503275	0.0151233	0.00296842	0.00114489	0.00480545	-0.000290412	0.00133877	-0.0014512	-0.00441617	-0.00114052	-0.0102563	-0.00573394	-0.0397254	0.00525997	1.56797e-05	0.000134055	-0.000171942	-0.00472584	0.0058764	0.00240688	-0.00554065	0.00404841	5.15487e-05	0.097915	-0.000356643	-0.00193891	-0.0161192	0.0163586	-0.14137	-0.0111449	-8.23803e-05	-0.00272204	-0.00971276	4.57279e-06	-2.77832e-05	-0.0174457	0.00259772	1.42362e-05	0.00191978	8.61473e-09	0.0019384	1.11759e-08	0.00182804	0.000670105	0.00108322	0.000265325
GCTGCAGTCACCGACG.1	-0.00439443	-0.00120098	-0.0281106	-0.0127365	0.00692091	0.00294232	0.00109433	0.00670088	-0.000250384	0.00115887	-0.0013473	-0.00363564	-0.00117615	0.00929382	-0.00375124	-0.0526466	0.00529592	1.48863e-05	0.000132976	0.00598794	-0.00326355	0.00579181	0.00215903	-0.00559492	0.00411735	4.15631e-05	0.0496047	-0.000325462	-0.00126005	-0.00904505	0.0125865	-0.0689964	-0.00536075	-6.53436e-05	-0.002722	-0.00642273	4.17232e-06	-4.76986e-05	-0.0140511	0.00258422	1.93194e-05	-0.0010724	8.03266e-09	0.00124328	-6.44359e-06	0.00185376	0.000617474	0.00118743	0.000265947
GCTTCACAGTCATAGA.1	-0.0121498	-0.000454572	-0.0970129	1.99899e-05	0.016233	0.00293094	0.00112019	0.0059836	-0.00028784	0.00163966	-0.00138118	-0.00444531	-0.0011635	-0.00853539	-0.00542213	-0.0303792	0.00528369	1.45473e-05	0.000134084	-0.00231416	-0.00408037	0.00586363	0.00214814	-0.0054801	0.00405637	5.93252e-05	0.101361	-0.000354661	-0.00190732	-0.0149261	0.0148759	-0.12084	-0.00942118	-7.93184e-05	-0.002722	-0.00925657	5.91157e-06	-2.93627e-05	-0.0168627	0.00256826	1.52737e-05	0.000728359	8.17818e-09	0.00190969	-2.91038e-08	0.00184908	0.000468388	0.0010965	0.000265643
[truncated: 4,447 more rows]
[truncated: 21 more columns]

## Sheet: Fig1g
ECAR
Time (minutes)	F9-Ctrl	F9-Ctrl	F9-Ctrl	F9-Ctrl	F9-Ctrl	F9-Ctrl	F9-Ctrl	F9-Stra8	F9-Stra8	F9-Stra8	F9-Stra8	F9-Stra8	F9-Stra8	F9-Stra8
1.314	49.306	50.377	48.898	57.023	36.555	49.475	49.933	50.138	49.165	49.912	48.863	48.433	41.43	60.014
7.722	50.362	47.796	46.919	53.084	33.308	44.62	45.206	45.305	32.804	45.671	49.103	50.742	42.158	40.128
14.032	49.421	45.85	45.986	52.038	37.711	43.266	45.456	43.617	42.981	47.26	43.903	45.512	48.035	38.759
[truncated: 13 more rows]

## Sheet: Fig1j
OCR
[truncated: 17 more rows]

## Sheet: Fig2e
gene	FC	p.value	p.adj
Ldha	1.59744e+07	0	0
[truncated: 8,143 more rows]

## Sheet: Fig2h
gene	FC	p.value	p.adj
[truncated: 8,144 more rows]

[truncated: 6 more sheets: Fig3f, Fig4b, Fig4d, Fig4f, Fig5b, Fig5e]
